# Supplementary material for: Knowledge, attitude, and practice regarding COVID-19 outbreak in Bangladesh: An online-based cross-sectional study
Source: PLoS One. 2020 Oct 9;15(10):e0239254. doi: 10.1371/journal.pone.0239254 (PMC7546509; doi:10.1371/journal.pone.0239254)
Supplement: S1 Data — (XLSX) [file pone.0239254.s001.xlsx]

## Sheet: Data_KAP_Study_Bangladesh
ID No	Gender	Age_cate	Education	Matital_status	Occupation	Family_type	No_F_member	Monthly_family_income	Residence	Knowledge	Attitude	Practice	K1	K2	K3	K4	K5	K6	A1	A2	A3	A4	A5	A6	P1	P2	P3	P4	P5	P6	P7
1	Male	12-20	Bachelor	Single	Student	Nuclear	<5	<20,000	Urban area	More accurate	Less Positive	Less frequent	Yes	Don't know	Yes	Yes	No	No	Agree	Agree	Agree	Agree	Disagree	Agree	No	Yes	Yes	Sometimes	Yes	Sometimes	Yes
2	Male	12-20	Bachelor	Single	Student	Nuclear	<5	<20,000	Rural area	More accurate	Less Positive	Less frequent	Yes	Yes	Yes	Yes	Don't know	No	Agree	Disagree	Agree	Agree	Agree	Agree	Sometimes	Yes	Sometimes	Yes	Yes	Sometimes	Yes
3	Male	21-30	Bachelor	Single	Student	Nuclear	≥5	<20,000	Rural area	More accurate	Less Positive	Less frequent	Yes	Yes	Yes	Yes	Yes	Don't know	Agree	Agree	Agree	Agree	Disagree	Agree	Yes	Yes	Sometimes	Yes	No	Sometimes	Sometimes
4	Male	21-30	Intermediate (11-12)	Single	Student	Nuclear	<5	<20,000	Urban area	More accurate	Less Positive	Less frequent	Yes	No	Yes	Yes	No	No	Agree	Agree	Agree	Agree	Disagree	Agree	Yes	Yes	Yes	Yes	No	Yes	Sometimes
5	Male	21-30	Bachelor	Single	Student	Nuclear	≥5	<20,000	Urban area	More accurate	Less Positive	Less frequent	Yes	No	Yes	Yes	No	No	Agree	Agree	Agree	Disagree	Disagree	Agree	Yes	Yes	Yes	No	No	Yes	Yes
6	Male	12-20	Bachelor	Single	Student	Nuclear	<5	<20,000	Urban area	More accurate	Less Positive	Less frequent	Yes	Don't know	Yes	Yes	Don't know	No	Agree	Agree	Agree	Agree	Disagree	Agree	Sometimes	Yes	Sometimes	Yes	No	Sometimes	Sometimes
7	Male	12-20	Intermediate (11-12)	Single	Student	Nuclear	<5	<20,000	Rural area	More accurate	Less Positive	Less frequent	Yes	Don't know	Yes	Yes	No	No	Agree	Agree	Agree	Agree	Disagree	Agree	Sometimes	Yes	Yes	Yes	No	Yes	Yes
8	Male	21-30	Bachelor	Single	Student	Nuclear	<5	<20,000	Urban area	More accurate	Less Positive	Less frequent	Yes	No	Yes	Yes	Don't know	No	Agree	Agree	Agree	Disagree	Agree	Agree	Sometimes	Yes	Sometimes	Yes	No	Yes	Yes
9	Male	12-20	Bachelor	Single	Student	Nuclear	<5	<20,000	Urban area	More accurate	Less Positive	Less frequent	Yes	No	Yes	Yes	Yes	No	Agree	Agree	Agree	Agree	Disagree	Agree	Sometimes	Yes	Yes	Sometimes	No	Yes	Yes
10	Male	21-30	Bachelor	Single	Student	Nuclear	<5	<20,000	Urban area	More accurate	Less Positive	Less frequent	Yes	Yes	Yes	Yes	Yes	No	Agree	Agree	Agree	Undecided	Undecided	Agree	Sometimes	Yes	Sometimes	Yes	No	Yes	Sometimes
11	Male	12-20	Intermediate (11-12)	Single	Student	Nuclear	≥5	<20,000	Urban area	More accurate	Less Positive	Less frequent	Yes	Yes	Yes	Yes	No	No	Agree	Agree	Agree	Agree	Disagree	Agree	Sometimes	Yes	Sometimes	Yes	No	Yes	Yes
12	Male	21-30	Bachelor	Single	Student	Nuclear	<5	<20,000	Rural area	More accurate	Less Positive	Less frequent	Yes	Yes	Yes	Yes	Don't know	No	Agree	Agree	Agree	Undecided	Disagree	Agree	Sometimes	Yes	Yes	Sometimes	No	No	Yes
13	Male	>30	Bachelor	Single	Student	Nuclear	<5	<20,000	Rural area	More accurate	Less Positive	Less frequent	Yes	Yes	Yes	Yes	No	No	Agree	Agree	Agree	Agree	Disagree	Agree	Yes	Yes	Sometimes	Yes	No	Yes	Yes
14	Male	21-30	Bachelor	Single	Student	Nuclear	≥5	<20,000	Urban area	More accurate	Less Positive	Less frequent	Yes	Yes	Yes	Yes	Don't know	No	Agree	Agree	Agree	Agree	Disagree	Agree	Yes	Yes	Yes	Sometimes	No	Yes	Yes
15	Male	12-20	Bachelor	Single	Student	Nuclear	<5	<20,000	Rural area	Less accurate	Less Positive	Less frequent	Yes	Yes	Yes	Yes	Don't know	Don't know	Agree	Agree	Agree	Agree	Disagree	Agree	Sometimes	Yes	Sometimes	Sometimes	No	Yes	Sometimes
16	Male	12-20	Bachelor	Single	Student	Nuclear	≥5	<20,000	Urban area	Less accurate	Less Positive	Less frequent	No	Don't know	Yes	Yes	No	No	Agree	Agree	Agree	Agree	Disagree	Agree	Sometimes	Yes	Yes	No	No	Sometimes	Yes
17	Male	21-30	Bachelor	Single	Student	Nuclear	<5	<20,000	Rural area	More accurate	Less Positive	Less frequent	Yes	No	Yes	Yes	Yes	No	Agree	Agree	Agree	Agree	Disagree	Agree	No	Yes	No	Yes	No	Sometimes	Sometimes
18	Male	21-30	Secondary (6-10)	Single	Businessman	Nuclear	≥5	<20,000	Rural area	More accurate	Less Positive	Less frequent	No	No	Yes	Yes	Yes	No	Agree	Agree	Agree	Agree	Agree	Disagree	No	Yes	No	No	No	Sometimes	Sometimes
19	Male	21-30	Bachelor	Single	Student	Nuclear	<5	<20,000	Rural area	More accurate	Less Positive	Less frequent	Yes	Yes	Yes	Yes	No	No	Agree	Agree	Agree	Agree	Disagree	Agree	Yes	Yes	Yes	Sometimes	No	Yes	Sometimes
20	Male	21-30	Intermediate (11-12)	Single	Non-govt. empolyee	Nuclear	<5	<20,000	Urban area	More accurate	Less Positive	Less frequent	Yes	Yes	Yes	Yes	Yes	No	Agree	Agree	Agree	Disagree	Undecided	Agree	Sometimes	Yes	Sometimes	Yes	No	Yes	Yes
21	Male	21-30	Bachelor	Single	Student	Nuclear	<5	<20,000	Rural area	More accurate	Less Positive	Less frequent	Yes	No	Yes	Yes	No	No	Agree	Agree	Agree	Agree	Disagree	Agree	No	Yes	No	Yes	No	Yes	Yes
22	Male	21-30	Highier education (avobe bachelor)	Single	Non-govt. empolyee	Nuclear	<5	<20,000	Rural area	More accurate	Less Positive	Less frequent	Yes	No	Yes	Yes	No	No	Agree	Agree	Agree	Agree	Disagree	Agree	Yes	Yes	No	Yes	No	Yes	Sometimes
23	Male	21-30	Intermediate (11-12)	Single	Student	Nuclear	<5	<20,000	Urban area	More accurate	Less Positive	Less frequent	Yes	No	Yes	Yes	Yes	No	Agree	Agree	Agree	Disagree	Disagree	Agree	Sometimes	Yes	Yes	Sometimes	Yes	Yes	Sometimes
24	Male	12-20	Bachelor	Single	Student	Nuclear	<5	<20,000	Rural area	More accurate	Less Positive	Less frequent	Yes	No	Yes	Yes	Yes	No	Agree	Agree	Agree	Agree	Disagree	Agree	Yes	Yes	Sometimes	Yes	Yes	Sometimes	Yes
25	Male	12-20	Secondary (6-10)	Single	Student	Nuclear	<5	<20,000	Rural area	Less accurate	Less Positive	Less frequent	Don't know	Yes	Yes	Yes	Don't know	Don't know	Undecided	Agree	Agree	Undecided	Undecided	Undecided	Sometimes	Yes	Sometimes	Sometimes	No	Sometimes	Yes
26	Male	12-20	Bachelor	Single	Student	Nuclear	<5	<20,000	Rural area	More accurate	Less Positive	Less frequent	Yes	No	Yes	Yes	Yes	No	Agree	Agree	Agree	Undecided	Disagree	Agree	Yes	Yes	Sometimes	Yes	No	Yes	Yes
27	Male	21-30	Bachelor	Single	Student	Nuclear	≥5	<20,000	Urban area	More accurate	Less Positive	Less frequent	Yes	Yes	Yes	Yes	Don't know	No	Agree	Agree	Agree	Disagree	Agree	Agree	Sometimes	Yes	Yes	Yes	No	Yes	No
28	Female	21-30	Bachelor	Single	Student	Nuclear	<5	<20,000	Rural area	Less accurate	Less Positive	Less frequent	No	Yes	Yes	Yes	No	No	Agree	Agree	Agree	Agree	Disagree	Agree	Yes	Yes	Sometimes	Yes	No	Yes	Yes
29	Female	12-20	Bachelor	Single	Student	Nuclear	<5	<20,000	Urban area	More accurate	Less Positive	Less frequent	Yes	Yes	Yes	Yes	Yes	No	Agree	Agree	Agree	Agree	Disagree	Agree	Yes	Yes	Yes	Yes	No	Sometimes	Yes
30	Female	12-20	Bachelor	Single	Student	Nuclear	<5	<20,000	Rural area	Less accurate	Less Positive	Less frequent	Yes	Don't know	Yes	Yes	Don't know	Don't know	Agree	Agree	Agree	Undecided	Undecided	Undecided	Sometimes	Yes	Sometimes	Yes	No	Yes	Yes
31	Female	12-20	Bachelor	Single	Student	Nuclear	<5	<20,000	Urban area	More accurate	Less Positive	Less frequent	Yes	Yes	Yes	Yes	No	No	Agree	Disagree	Agree	Agree	Agree	Agree	Yes	Yes	Sometimes	Yes	No	Yes	Yes
32	Female	21-30	Bachelor	Single	Student	Nuclear	<5	<20,000	Urban area	More accurate	Less Positive	Less frequent	Yes	No	Yes	Yes	Yes	No	Agree	Agree	Agree	Agree	Disagree	Agree	Sometimes	Yes	Sometimes	Yes	Yes	Sometimes	Sometimes
33	Female	21-30	Bachelor	Single	Student	Nuclear	<5	<20,000	Urban area	More accurate	Less Positive	Less frequent	Yes	Yes	Yes	Yes	Yes	No	Agree	Agree	Agree	Agree	Disagree	Agree	Yes	Yes	Sometimes	Yes	No	Sometimes	Yes
34	Female	21-30	Bachelor	Single	Student	Nuclear	<5	<20,000	Rural area	More accurate	Less Positive	Less frequent	Yes	No	Yes	Yes	Yes	No	Agree	Agree	Agree	Agree	Disagree	Agree	Sometimes	Yes	No	Yes	Yes	Yes	Yes
35	Female	12-20	Bachelor	Single	Student	Nuclear	<5	<20,000	Rural area	More accurate	Less Positive	Less frequent	Yes	Yes	Yes	Yes	No	No	Agree	Agree	Agree	Agree	Disagree	Agree	Sometimes	Yes	Sometimes	Yes	Yes	Yes	Yes
36	Female	12-20	Bachelor	Single	Student	Nuclear	<5	<20,000	Rural area	More accurate	Less Positive	Less frequent	Yes	Yes	Yes	Yes	No	No	Agree	Agree	Agree	Agree	Disagree	Agree	Sometimes	Yes	Sometimes	Yes	No	Yes	Yes
37	Female	12-20	Bachelor	Single	Student	Nuclear	<5	<20,000	Rural area	More accurate	Less Positive	Less frequent	Yes	Yes	Yes	Yes	Don't know	No	Agree	Agree	Agree	Agree	Disagree	Agree	Sometimes	Yes	Yes	Yes	No	Yes	Yes
38	Female	12-20	Bachelor	Single	Student	Nuclear	<5	<20,000	Urban area	More accurate	Less Positive	Less frequent	Yes	No	Yes	Yes	Don't know	No	Agree	Agree	Agree	Agree	Disagree	Agree	No	Yes	Sometimes	Yes	No	Sometimes	Yes
39	Female	21-30	Highier education (avobe bachelor)	Single	Student	Nuclear	≥5	<20,000	Urban area	More accurate	Less Positive	Less frequent	Yes	No	Yes	Yes	No	No	Agree	Agree	Agree	Disagree	Agree	Agree	Yes	Yes	Sometimes	Yes	No	Yes	Yes
40	Female	21-30	Bachelor	Single	Student	Nuclear	≥5	<20,000	Urban area	More accurate	Less Positive	Less frequent	Yes	Yes	Yes	Yes	Don't know	No	Agree	Agree	Agree	Disagree	Agree	Agree	Yes	Yes	Sometimes	Yes	No	Yes	Yes
41	Female	21-30	Bachelor	Single	Student	Nuclear	≥5	<20,000	Urban area	More accurate	Less Positive	Less frequent	Yes	Yes	Yes	Yes	Don't know	No	Agree	Agree	Agree	Disagree	Agree	Agree	Yes	Yes	Sometimes	Yes	No	Yes	Yes
42	Female	12-20	Bachelor	Single	Student	Nuclear	<5	<20,000	Rural area	More accurate	Less Positive	Less frequent	Yes	No	Yes	Yes	No	No	Agree	Agree	Agree	Undecided	Disagree	Agree	Yes	Yes	Sometimes	Yes	No	Yes	Yes
43	Male	21-30	Bachelor	Married	Student	Nuclear	≥5	<20,000	Urban area	More accurate	Less Positive	Less frequent	Yes	Yes	Yes	Yes	No	No	Agree	Agree	Agree	Agree	Disagree	Agree	Sometimes	Yes	Sometimes	Yes	No	Sometimes	Sometimes
44	Male	21-30	Highier education (avobe bachelor)	Married	Govt. employee	Nuclear	<5	<20,000	Rural area	More accurate	Less Positive	Less frequent	No	No	Yes	Yes	Yes	Yes	Undecided	Agree	Disagree	Agree	Agree	Agree	Yes	Yes	Yes	No	No	Sometimes	Sometimes
45	Male	>30	Highier education (avobe bachelor)	Married	Govt. employee	Nuclear	<5	<20,000	Rural area	More accurate	Less Positive	Less frequent	Yes	No	Yes	Yes	Don't know	No	Agree	Agree	Agree	Agree	Disagree	Agree	Yes	Yes	Yes	Yes	No	Sometimes	Yes
46	Female	21-30	Highier education (avobe bachelor)	Divorced	Housewife	Nuclear	<5	<20,000	Rural area	More accurate	Less Positive	Less frequent	Yes	Yes	Yes	Yes	Yes	Yes	Disagree	Agree	Disagree	Agree	Disagree	Disagree	Sometimes	Yes	No	Yes	Yes	Sometimes	Sometimes
47	Male	21-30	Intermediate (11-12)	Single	Student	Join	<5	<20,000	Urban area	More accurate	Less Positive	Less frequent	Yes	Yes	Yes	Yes	Yes	Don't know	Agree	Agree	Agree	Disagree	Disagree	Agree	Sometimes	Yes	Sometimes	Yes	Yes	Yes	Yes
48	Male	21-30	Highier education (avobe bachelor)	Single	Student	Join	≥5	<20,000	Urban area	More accurate	Less Positive	Less frequent	Yes	Yes	Yes	Yes	Yes	No	Agree	Agree	Agree	Disagree	Disagree	Agree	Yes	Yes	Yes	Sometimes	No	Sometimes	Sometimes
49	Male	12-20	Bachelor	Single	Student	Join	≥5	<20,000	Urban area	More accurate	Less Positive	Less frequent	Yes	Yes	Yes	Yes	No	No	Agree	Agree	Agree	Agree	Disagree	Agree	Yes	Yes	Yes	Sometimes	No	Yes	Yes
50	Male	21-30	Bachelor	Single	Student	Join	≥5	<20,000	Urban area	More accurate	Less Positive	Less frequent	Yes	Yes	Yes	Yes	Don't know	No	Agree	Agree	Agree	Agree	Disagree	Agree	Yes	Yes	Sometimes	Sometimes	No	Sometimes	Sometimes
51	Male	12-20	Intermediate (11-12)	Single	Student	Join	<5	<20,000	Rural area	More accurate	Less Positive	Less frequent	Yes	No	Yes	Yes	No	No	Agree	Agree	Agree	Agree	Disagree	Agree	Sometimes	Yes	Yes	Yes	No	Sometimes	Yes
52	Male	21-30	Bachelor	Single	Student	Join	≥5	<20,000	Urban area	More accurate	Less Positive	Less frequent	Yes	Yes	Yes	Yes	Yes	No	Agree	Agree	Agree	Agree	Disagree	Agree	Yes	Yes	Yes	Yes	No	Sometimes	Sometimes
53	Female	21-30	Bachelor	Single	Housewife	Join	≥5	<20,000	Rural area	More accurate	Less Positive	Less frequent	Yes	No	Yes	Yes	Yes	No	Agree	Agree	Agree	Undecided	Undecided	Agree	No	Yes	Yes	Yes	No	Yes	Yes
54	Female	12-20	Intermediate (11-12)	Married	Student	Join	<5	<20,000	Rural area	More accurate	Less Positive	Less frequent	Don't know	Yes	Yes	Yes	Yes	No	Agree	Agree	Agree	Agree	Disagree	Undecided	Sometimes	Yes	Sometimes	Yes	Yes	Sometimes	Sometimes
55	Male	21-30	Bachelor	Single	Student	Nuclear	<5	20,000-30,000	Rural area	More accurate	Less Positive	Less frequent	Yes	Yes	Yes	Yes	Yes	No	Agree	Undecided	Agree	Agree	Disagree	Agree	Sometimes	Yes	No	Sometimes	No	Yes	Yes
56	Male	21-30	Bachelor	Single	Student	Nuclear	<5	20,000-30,000	Rural area	More accurate	Less Positive	Less frequent	Yes	No	Yes	Yes	No	No	Agree	Agree	Agree	Agree	Disagree	Agree	Yes	Yes	Sometimes	Yes	No	Yes	Yes
57	Male	21-30	Bachelor	Single	Student	Nuclear	<5	20,000-30,000	Rural area	More accurate	Less Positive	Less frequent	Yes	No	Yes	Yes	Don't know	Don't know	Agree	Agree	Agree	Undecided	Undecided	Agree	Sometimes	Yes	Sometimes	Sometimes	No	Sometimes	Sometimes
58	Male	12-20	Bachelor	Single	Student	Nuclear	<5	20,000-30,000	Urban area	More accurate	Less Positive	Less frequent	Yes	Yes	Yes	Yes	Yes	No	Agree	Agree	Agree	Agree	Disagree	Agree	Yes	Yes	Yes	Yes	No	Yes	Sometimes
59	Male	21-30	Intermediate (11-12)	Single	Student	Nuclear	<5	20,000-30,000	Urban area	More accurate	Less Positive	Less frequent	Yes	No	Yes	Yes	No	No	Agree	Agree	Agree	Disagree	Agree	Agree	No	Yes	Sometimes	Sometimes	No	Sometimes	Sometimes
60	Male	12-20	Bachelor	Single	Student	Nuclear	<5	20,000-30,000	Rural area	More accurate	Less Positive	Less frequent	Yes	Yes	Yes	Yes	Yes	Yes	Agree	Undecided	Disagree	Disagree	Agree	Agree	No	Yes	No	No	No	Sometimes	Yes
61	Male	21-30	Bachelor	Single	Student	Nuclear	<5	20,000-30,000	Rural area	More accurate	Less Positive	Less frequent	Yes	Yes	Yes	Yes	Don't know	No	Agree	Agree	Agree	Agree	Disagree	Agree	Sometimes	Yes	Sometimes	Yes	No	Yes	Yes
62	Male	21-30	Bachelor	Single	Student	Nuclear	<5	20,000-30,000	Rural area	More accurate	Less Positive	Less frequent	Yes	No	Yes	Yes	Yes	No	Agree	Agree	Agree	Agree	Disagree	Agree	Yes	Yes	Yes	Yes	No	No	Yes
63	Male	21-30	Highier education (avobe bachelor)	Single	Non-govt. empolyee	Nuclear	<5	20,000-30,000	Rural area	More accurate	Less Positive	Less frequent	Yes	Yes	Yes	Yes	Yes	No	Agree	Agree	Agree	Agree	Disagree	Agree	Yes	Yes	Sometimes	Yes	No	Yes	Yes
64	Male	12-20	Bachelor	Single	Student	Nuclear	≥5	20,000-30,000	Rural area	More accurate	Less Positive	Less frequent	Yes	Yes	Yes	Yes	No	No	Agree	Agree	Agree	Agree	Disagree	Agree	Yes	Yes	Sometimes	Yes	No	Yes	Yes
65	Male	12-20	Bachelor	Single	Student	Nuclear	<5	20,000-30,000	Rural area	Less accurate	Less Positive	Less frequent	Yes	Yes	Yes	Yes	No	Don't know	Agree	Agree	Agree	Agree	Undecided	Undecided	Sometimes	Yes	Sometimes	Yes	No	Sometimes	Yes
66	Male	12-20	Bachelor	Single	Student	Nuclear	<5	20,000-30,000	Urban area	More accurate	Less Positive	Less frequent	Yes	Yes	Yes	Yes	Yes	No	Agree	Agree	Agree	Agree	Disagree	Agree	Yes	Yes	Sometimes	Sometimes	Yes	Yes	Sometimes
67	Male	21-30	Highier education (avobe bachelor)	Single	Non-govt. empolyee	Nuclear	<5	20,000-30,000	Rural area	More accurate	Less Positive	Less frequent	Yes	No	Yes	Yes	Yes	No	Agree	Agree	Agree	Disagree	Disagree	Agree	Sometimes	Yes	Sometimes	Yes	No	Sometimes	Sometimes
68	Male	12-20	Bachelor	Single	Student	Nuclear	<5	20,000-30,000	Rural area	More accurate	Less Positive	Less frequent	Yes	No	Yes	Yes	Don't know	No	Agree	Agree	Agree	Agree	Disagree	Agree	Yes	Yes	Yes	Yes	No	Sometimes	Yes
69	Male	21-30	Highier education (avobe bachelor)	Single	Student	Nuclear	≥5	20,000-30,000	Urban area	More accurate	Less Positive	Less frequent	Yes	Don't know	Yes	Yes	Yes	No	Agree	Agree	Agree	Agree	Disagree	Agree	Sometimes	Yes	Yes	Yes	No	No	Yes
70	Male	21-30	Highier education (avobe bachelor)	Single	Student	Nuclear	<5	20,000-30,000	Rural area	More accurate	Less Positive	Less frequent	Yes	Yes	Yes	Yes	No	No	Agree	Agree	Agree	Agree	Disagree	Agree	Sometimes	Yes	Sometimes	Yes	No	Yes	Yes
71	Male	12-20	Intermediate (11-12)	Single	Student	Nuclear	<5	20,000-30,000	Urban area	More accurate	Less Positive	Less frequent	Yes	Don't know	Yes	Yes	Don't know	No	Agree	Agree	Agree	Agree	Disagree	Agree	Sometimes	Yes	Sometimes	Yes	No	Yes	Yes
72	Male	21-30	Highier education (avobe bachelor)	Single	Non-govt. empolyee	Nuclear	<5	20,000-30,000	Urban area	More accurate	Less Positive	Less frequent	Yes	Yes	Yes	Yes	Don't know	No	Agree	Agree	Agree	Agree	Disagree	Agree	Sometimes	Yes	Sometimes	Sometimes	No	Yes	Sometimes
73	Female	12-20	Bachelor	Single	Student	Nuclear	≥5	20,000-30,000	Rural area	More accurate	Less Positive	Less frequent	Yes	Yes	Yes	Yes	No	No	Agree	Agree	Agree	Agree	Disagree	Agree	Sometimes	Yes	Sometimes	Yes	Yes	Yes	Yes
74	Female	12-20	Bachelor	Single	Student	Nuclear	<5	20,000-30,000	Rural area	More accurate	Less Positive	Less frequent	Yes	Yes	Yes	Yes	No	No	Agree	Agree	Agree	Agree	Disagree	Agree	Yes	Yes	No	Yes	No	Sometimes	Yes
75	Female	12-20	Bachelor	Single	Student	Nuclear	<5	20,000-30,000	Rural area	More accurate	Less Positive	Less frequent	Yes	No	Yes	Yes	Yes	No	Agree	Agree	Agree	Agree	Disagree	Agree	Yes	Yes	Sometimes	Yes	No	Yes	Yes
76	Female	12-20	Bachelor	Single	Student	Nuclear	<5	20,000-30,000	Rural area	More accurate	Less Positive	Less frequent	Yes	Don't know	Yes	Yes	No	No	Agree	Agree	Agree	Agree	Undecided	Undecided	Sometimes	Yes	Sometimes	Yes	No	Sometimes	Yes
77	Female	12-20	Bachelor	Single	Student	Nuclear	<5	20,000-30,000	Rural area	More accurate	Less Positive	Less frequent	Yes	No	Yes	Yes	Don't know	No	Agree	Agree	Agree	Agree	Disagree	Agree	Sometimes	Yes	Yes	Yes	No	Yes	Yes
78	Female	21-30	Bachelor	Single	Student	Nuclear	<5	20,000-30,000	Rural area	More accurate	Less Positive	Less frequent	Yes	No	Yes	Yes	Yes	No	Agree	Agree	Agree	Agree	Disagree	Agree	Sometimes	Yes	Yes	Yes	No	Yes	Yes
79	Female	21-30	Bachelor	Single	Student	Nuclear	<5	20,000-30,000	Rural area	More accurate	Less Positive	Less frequent	Yes	No	Yes	Yes	No	No	Agree	Agree	Agree	Agree	Disagree	Agree	Yes	Yes	Sometimes	Yes	No	Yes	Yes
80	Female	12-20	Bachelor	Single	Student	Nuclear	<5	20,000-30,000	Rural area	More accurate	Less Positive	Less frequent	Yes	No	Yes	Yes	Yes	No	Agree	Agree	Agree	Agree	Disagree	Agree	Sometimes	Yes	No	Yes	Yes	Sometimes	Sometimes
81	Female	12-20	Bachelor	Single	Student	Nuclear	<5	20,000-30,000	Rural area	More accurate	Less Positive	Less frequent	Yes	No	Yes	Yes	No	No	Agree	Agree	Agree	Agree	Disagree	Agree	Yes	Yes	No	Yes	Yes	Yes	No
82	Female	12-20	Bachelor	Single	Student	Nuclear	<5	20,000-30,000	Urban area	More accurate	Less Positive	Less frequent	Yes	No	Yes	Yes	Don't know	No	Agree	Agree	Agree	Agree	Disagree	Agree	Yes	Yes	No	Yes	Yes	Yes	No
83	Male	21-30	Bachelor	Married	Student	Nuclear	<5	20,000-30,000	Rural area	More accurate	Less Positive	Less frequent	Yes	Yes	Yes	Yes	No	No	Agree	Agree	Agree	Agree	Disagree	Agree	Sometimes	Yes	Sometimes	Yes	No	Yes	Yes
84	Female	21-30	Highier education (avobe bachelor)	Married	Housewife	Nuclear	<5	20,000-30,000	Rural area	More accurate	Less Positive	Less frequent	Yes	No	Yes	Yes	Don't know	Don't know	Agree	Agree	Agree	Disagree	Agree	Agree	Sometimes	Yes	Sometimes	Yes	No	Sometimes	Yes
85	Female	21-30	Highier education (avobe bachelor)	Married	Non-govt. empolyee	Nuclear	≥5	20,000-30,000	Rural area	More accurate	Less Positive	Less frequent	Yes	Yes	Yes	Yes	Yes	Don't know	Agree	Agree	Agree	Undecided	Disagree	Agree	Sometimes	Yes	Yes	Yes	No	Sometimes	Yes
86	Male	21-30	Bachelor	Single	Student	Join	≥5	20,000-30,000	Urban area	More accurate	Less Positive	Less frequent	Yes	Yes	Yes	Yes	Yes	No	Agree	Agree	Agree	Agree	Disagree	Agree	Yes	Yes	Yes	Yes	No	Sometimes	Sometimes
87	Male	21-30	Bachelor	Single	Student	Join	≥5	20,000-30,000	Urban area	Less accurate	Less Positive	Less frequent	Yes	Don't know	Yes	Yes	Don't know	Don't know	Agree	Agree	Agree	Agree	Disagree	Agree	Sometimes	Yes	No	Yes	No	Sometimes	Yes
88	Male	12-20	Bachelor	Single	Student	Join	<5	20,000-30,000	Rural area	More accurate	Less Positive	Less frequent	Yes	No	Yes	Yes	Yes	Don't know	Agree	Agree	Agree	Agree	Disagree	Agree	Sometimes	Yes	Sometimes	Yes	No	Yes	Yes
89	Female	12-20	Bachelor	Single	Student	Join	≥5	20,000-30,000	Urban area	More accurate	Less Positive	Less frequent	Yes	Yes	Yes	Yes	No	No	Agree	Agree	Agree	Agree	Disagree	Agree	Sometimes	Yes	No	Yes	No	Sometimes	Yes
90	Male	21-30	Bachelor	Married	Student	Join	≥5	20,000-30,000	Urban area	More accurate	Less Positive	Less frequent	Yes	Yes	Yes	Yes	No	No	Agree	Agree	Agree	Agree	Disagree	Agree	No	Yes	Yes	Yes	No	Yes	Yes
91	Male	12-20	Bachelor	Single	Student	Nuclear	<5	>30,000	Rural area	More accurate	Less Positive	Less frequent	Yes	Don't know	Yes	Yes	Yes	No	Agree	Agree	Agree	Agree	Disagree	Agree	No	Yes	No	Yes	No	Sometimes	Yes
92	Male	21-30	Highier education (avobe bachelor)	Single	Student	Nuclear	≥5	>30,000	Urban area	More accurate	Less Positive	Less frequent	Yes	Yes	Yes	Yes	No	No	Agree	Agree	Agree	Agree	Disagree	Agree	Yes	Yes	Sometimes	Sometimes	No	Yes	Yes
93	Male	21-30	Bachelor	Single	Student	Nuclear	<5	>30,000	Rural area	More accurate	Less Positive	Less frequent	Yes	No	Yes	Yes	No	Don't know	Agree	Agree	Agree	Disagree	Disagree	Agree	Sometimes	Yes	Sometimes	Yes	No	Sometimes	Sometimes
94	Male	12-20	Bachelor	Single	Student	Nuclear	<5	>30,000	Rural area	More accurate	Less Positive	Less frequent	Yes	No	Yes	Yes	Yes	No	Agree	Agree	Agree	Disagree	Agree	Agree	Sometimes	Yes	Yes	Yes	No	Sometimes	Sometimes
95	Male	21-30	Bachelor	Single	Student	Nuclear	≥5	>30,000	Rural area	More accurate	Less Positive	Less frequent	Yes	Yes	Yes	Yes	No	No	Disagree	Agree	Agree	Agree	Agree	Agree	Sometimes	Yes	Sometimes	Yes	No	Sometimes	Sometimes
96	Male	12-20	Bachelor	Single	Student	Nuclear	<5	>30,000	Rural area	More accurate	Less Positive	Less frequent	Yes	No	Yes	Yes	No	No	Agree	Agree	Agree	Undecided	Disagree	Undecided	Yes	Yes	Sometimes	Yes	No	Sometimes	Yes
97	Male	12-20	Intermediate (11-12)	Single	Student	Nuclear	<5	>30,000	Rural area	More accurate	Less Positive	Less frequent	Yes	No	Yes	Yes	Yes	No	Agree	Agree	Agree	Agree	Disagree	Agree	Sometimes	Yes	Sometimes	Yes	No	Yes	Yes
98	Male	21-30	Bachelor	Single	Student	Nuclear	<5	>30,000	Rural area	More accurate	Less Positive	Less frequent	Yes	Don't know	Yes	Yes	Yes	Don't know	Agree	Agree	Agree	Agree	Disagree	Agree	Sometimes	Yes	Sometimes	Yes	No	Yes	Yes
99	Male	21-30	Bachelor	Single	Student	Nuclear	<5	>30,000	Rural area	More accurate	Less Positive	Less frequent	Yes	No	Yes	Yes	No	No	Agree	Agree	Agree	Agree	Disagree	Agree	Sometimes	Yes	Sometimes	Yes	Yes	Yes	Yes
100	Male	21-30	Bachelor	Single	Student	Nuclear	<5	>30,000	Rural area	More accurate	Less Positive	Less frequent	Yes	Don't know	Yes	Yes	Don't know	No	Agree	Agree	Agree	Agree	Disagree	Agree	Yes	Yes	Sometimes	Yes	No	Yes	Yes
101	Male	21-30	Bachelor	Single	Student	Nuclear	≥5	>30,000	Rural area	More accurate	Less Positive	Less frequent	Yes	Yes	Yes	Yes	No	No	Agree	Agree	Agree	Agree	Disagree	Agree	Yes	Yes	No	Yes	No	Yes	Yes
102	Male	21-30	Bachelor	Single	Student	Nuclear	<5	>30,000	Rural area	More accurate	Less Positive	Less frequent	Yes	Yes	Yes	Yes	No	No	Agree	Agree	Agree	Agree	Disagree	Agree	Sometimes	Yes	Sometimes	Yes	No	Yes	Yes
103	Male	12-20	Bachelor	Single	Student	Nuclear	<5	>30,000	Rural area	Less accurate	Less Positive	Less frequent	No	Yes	Yes	Yes	No	No	Agree	Disagree	Agree	Agree	Agree	Agree	Yes	Yes	No	Yes	No	Yes	Yes
104	Male	12-20	Bachelor	Single	Student	Nuclear	<5	>30,000	Rural area	More accurate	Less Positive	Less frequent	Yes	No	Yes	Yes	Yes	No	Agree	Agree	Agree	Agree	Disagree	Agree	Yes	Yes	Yes	Sometimes	No	Yes	Yes
105	Male	12-20	Intermediate (11-12)	Single	Student	Nuclear	<5	>30,000	Rural area	More accurate	Less Positive	Less frequent	Yes	Yes	Yes	Yes	Yes	No	Agree	Agree	Agree	Agree	Disagree	Agree	Yes	Yes	Yes	Yes	No	Sometimes	Yes
106	Male	21-30	Bachelor	Single	Non-govt. empolyee	Nuclear	<5	>30,000	Rural area	Less accurate	Less Positive	Less frequent	Yes	Yes	Yes	Yes	Don't know	Don't know	Agree	Agree	Agree	Agree	Disagree	Agree	Yes	Yes	Sometimes	Yes	No	Yes	Yes
107	Male	21-30	Intermediate (11-12)	Single	Businessman	Nuclear	<5	>30,000	Rural area	More accurate	Less Positive	Less frequent	Yes	Yes	Yes	Yes	Yes	No	Agree	Agree	Agree	Agree	Disagree	Agree	Yes	Yes	Sometimes	Sometimes	Yes	Yes	Yes
108	Male	21-30	Bachelor	Single	Student	Nuclear	<5	>30,000	Rural area	More accurate	Less Positive	Less frequent	Yes	No	Yes	Yes	Don't know	No	Agree	Agree	Agree	Agree	Disagree	Agree	Yes	Yes	No	Yes	No	Yes	Yes
109	Male	12-20	Intermediate (11-12)	Single	Student	Nuclear	<5	>30,000	Rural area	More accurate	Less Positive	Less frequent	Yes	No	Yes	Yes	Yes	No	Agree	Agree	Agree	Agree	Disagree	Agree	Yes	Yes	Sometimes	Yes	No	Yes	Yes
110	Male	12-20	Bachelor	Single	Student	Nuclear	<5	>30,000	Rural area	More accurate	Less Positive	Less frequent	Yes	No	Yes	Yes	No	No	Agree	Agree	Agree	Agree	Disagree	Agree	Yes	Yes	No	Sometimes	No	Yes	Yes
111	Male	12-20	Bachelor	Single	Student	Nuclear	<5	>30,000	Urban area	More accurate	Less Positive	Less frequent	Yes	No	Yes	Yes	Yes	No	Agree	Agree	Agree	Agree	Disagree	Agree	Sometimes	Yes	Yes	Yes	No	Yes	Yes
112	Male	21-30	Bachelor	Single	Student	Nuclear	<5	>30,000	Urban area	More accurate	Less Positive	Less frequent	Yes	Yes	Yes	Yes	Don't know	No	Agree	Agree	Agree	Disagree	Agree	Agree	Yes	Yes	No	Sometimes	Yes	Yes	Yes
113	Male	12-20	Bachelor	Single	Student	Nuclear	<5	>30,000	Urban area	More accurate	Less Positive	Less frequent	Yes	No	Yes	Yes	No	No	Agree	Agree	Agree	Agree	Disagree	Agree	Sometimes	Yes	Yes	Sometimes	No	Yes	Yes
114	Male	21-30	Highier education (avobe bachelor)	Single	Businessman	Nuclear	≥5	>30,000	Rural area	More accurate	Less Positive	Less frequent	Yes	No	Yes	Yes	Don't know	No	Agree	Agree	Agree	Agree	Disagree	Agree	Yes	Yes	Sometimes	Yes	No	Yes	Yes
115	Male	21-30	Highier education (avobe bachelor)	Single	Non-govt. empolyee	Nuclear	<5	>30,000	Rural area	More accurate	Less Positive	Less frequent	Yes	No	Yes	Yes	No	No	Agree	Agree	Agree	Agree	Disagree	Agree	Sometimes	Yes	Yes	Yes	No	Yes	Yes
116	Male	21-30	Bachelor	Single	Student	Nuclear	<5	>30,000	Rural area	More accurate	Less Positive	Less frequent	Yes	Yes	Yes	Yes	Yes	No	Agree	Agree	Agree	Agree	Disagree	Agree	Yes	Yes	Sometimes	Yes	No	Yes	Yes
117	Male	21-30	Bachelor	Single	Non-govt. empolyee	Nuclear	<5	>30,000	Rural area	More accurate	Less Positive	Less frequent	Yes	No	Yes	Yes	Yes	No	Agree	Agree	Agree	Agree	Disagree	Agree	Yes	Yes	Sometimes	Sometimes	Yes	Yes	Sometimes
118	Male	21-30	Bachelor	Single	Student	Nuclear	<5	>30,000	Rural area	More accurate	Less Positive	Less frequent	Yes	Yes	Yes	Yes	Don't know	No	Agree	Agree	Agree	Agree	Disagree	Agree	Sometimes	Yes	Sometimes	Yes	Yes	Yes	Yes
119	Male	21-30	Highier education (avobe bachelor)	Single	Non-govt. empolyee	Nuclear	<5	>30,000	Rural area	More accurate	Less Positive	Less frequent	Yes	Yes	Yes	Yes	Yes	No	Agree	Agree	Agree	Agree	Disagree	Agree	Yes	Yes	Sometimes	Yes	No	Yes	Yes
120	Female	12-20	Intermediate (11-12)	Single	Student	Nuclear	<5	>30,000	Rural area	More accurate	Less Positive	Less frequent	Yes	No	Yes	Yes	Don't know	No	Agree	Agree	Agree	Agree	Disagree	Agree	Sometimes	Yes	Sometimes	Yes	No	Yes	Yes
121	Female	21-30	Intermediate (11-12)	Single	Student	Nuclear	<5	>30,000	Rural area	More accurate	Less Positive	Less frequent	Yes	Don't know	Yes	Yes	No	No	Agree	Agree	Agree	Agree	Disagree	Agree	Yes	Yes	Sometimes	Yes	No	Sometimes	Sometimes
122	Female	12-20	Bachelor	Single	Student	Nuclear	<5	>30,000	Rural area	More accurate	Less Positive	Less frequent	Yes	No	Yes	Yes	Don't know	Don't know	Agree	Agree	Agree	Agree	Disagree	Agree	Sometimes	Yes	Yes	Yes	No	Yes	Yes
123	Female	12-20	Bachelor	Single	Student	Nuclear	<5	>30,000	Rural area	More accurate	Less Positive	Less frequent	Yes	No	Yes	Yes	Don't know	Don't know	Agree	Agree	Agree	Agree	Disagree	Agree	Sometimes	Yes	Yes	Yes	No	Yes	Yes
124	Female	12-20	Bachelor	Single	Student	Nuclear	<5	>30,000	Rural area	Less accurate	Less Positive	Less frequent	Yes	Yes	Yes	Yes	Don't know	Yes	Agree	Agree	Agree	Undecided	Disagree	Agree	Yes	Yes	Sometimes	Yes	No	Yes	Yes
125	Female	12-20	Bachelor	Single	Student	Nuclear	<5	>30,000	Rural area	More accurate	Less Positive	Less frequent	Yes	Yes	Yes	Yes	No	No	Agree	Agree	Agree	Agree	Disagree	Agree	Yes	Yes	Sometimes	Yes	No	Yes	Yes
126	Female	12-20	Intermediate (11-12)	Single	Student	Nuclear	<5	>30,000	Rural area	More accurate	Less Positive	Less frequent	Yes	No	Yes	Yes	Don't know	No	Agree	Agree	Agree	Agree	Disagree	Agree	Yes	Yes	Yes	Yes	No	Sometimes	Sometimes
127	Female	12-20	Bachelor	Single	Student	Nuclear	<5	>30,000	Rural area	More accurate	Less Positive	Less frequent	Yes	No	Yes	Yes	Yes	No	Agree	Agree	Agree	Agree	Disagree	Agree	Yes	Yes	Yes	Yes	No	Sometimes	Yes
128	Female	12-20	Intermediate (11-12)	Single	Student	Nuclear	<5	>30,000	Rural area	More accurate	Less Positive	Less frequent	Yes	No	Yes	Yes	No	No	Agree	Agree	Agree	Agree	Disagree	Agree	Sometimes	Yes	Sometimes	Yes	No	Yes	Yes
129	Female	21-30	Bachelor	Single	Student	Nuclear	<5	>30,000	Rural area	More accurate	Less Positive	Less frequent	Yes	Yes	Yes	Yes	Yes	No	Agree	Agree	Agree	Agree	Disagree	Agree	Yes	Yes	Sometimes	Yes	No	Yes	Yes
130	Female	21-30	Bachelor	Single	Student	Nuclear	<5	>30,000	Rural area	More accurate	Less Positive	Less frequent	Yes	No	Yes	Yes	Don't know	No	Agree	Agree	Agree	Agree	Disagree	Agree	Yes	Yes	Sometimes	Yes	No	Yes	Yes
131	Female	21-30	Bachelor	Single	Student	Nuclear	<5	>30,000	Urban area	More accurate	Less Positive	Less frequent	Yes	Yes	Yes	Yes	Don't know	No	Agree	Agree	Agree	Undecided	Disagree	Agree	Yes	Yes	Sometimes	Yes	No	Yes	Yes
132	Female	21-30	Bachelor	Single	Student	Nuclear	<5	>30,000	Rural area	More accurate	Less Positive	Less frequent	Yes	Yes	Yes	Yes	Don't know	No	Agree	Agree	Agree	Agree	Disagree	Agree	Yes	Yes	Sometimes	Yes	No	Yes	Yes
133	Female	12-20	Bachelor	Single	Student	Nuclear	<5	>30,000	Urban area	More accurate	Less Positive	Less frequent	Yes	No	Yes	Yes	No	No	Agree	Agree	Agree	Agree	Disagree	Agree	Yes	Yes	No	Yes	No	Yes	Yes
134	Female	12-20	Intermediate (11-12)	Single	Student	Nuclear	<5	>30,000	Rural area	More accurate	Less Positive	Less frequent	Yes	Don't know	Yes	Yes	No	No	Agree	Agree	Agree	Agree	Disagree	Agree	Sometimes	Yes	Yes	Yes	No	Yes	Yes
135	Female	12-20	Intermediate (11-12)	Single	Student	Nuclear	<5	>30,000	Rural area	More accurate	Less Positive	Less frequent	Yes	No	Yes	Yes	No	No	Agree	Agree	Agree	Disagree	Agree	Agree	Yes	Yes	Sometimes	Yes	No	Yes	Yes
136	Female	21-30	Highier education (avobe bachelor)	Single	Non-govt. empolyee	Nuclear	<5	>30,000	Rural area	More accurate	Less Positive	Less frequent	Yes	No	Yes	Yes	No	No	Agree	Agree	Agree	Agree	Disagree	Agree	Yes	Yes	Sometimes	Yes	Yes	Sometimes	Yes
137	Female	21-30	Bachelor	Single	Student	Nuclear	<5	>30,000	Urban area	More accurate	Less Positive	Less frequent	Yes	Yes	Yes	Yes	Don't know	No	Agree	Agree	Agree	Agree	Disagree	Agree	Yes	Yes	Sometimes	Yes	No	Yes	Yes
138	Female	12-20	Intermediate (11-12)	Single	Student	Nuclear	<5	>30,000	Rural area	More accurate	Less Positive	Less frequent	Yes	No	Yes	Yes	No	No	Agree	Agree	Agree	Agree	Disagree	Agree	Yes	Yes	Sometimes	Yes	No	Yes	Yes
139	Male	21-30	Bachelor	Married	Govt. employee	Nuclear	<5	>30,000	Urban area	More accurate	Less Positive	Less frequent	Yes	Yes	Yes	Yes	No	No	Agree	Agree	Agree	Agree	Disagree	Agree	No	Yes	Yes	Yes	No	Yes	Yes
140	Male	12-20	Bachelor	Married	Student	Nuclear	<5	>30,000	Urban area	More accurate	Less Positive	Less frequent	Yes	No	Yes	Yes	No	No	Agree	Agree	Agree	Agree	Disagree	Agree	Yes	Yes	Sometimes	Yes	No	Yes	Yes
141	Male	21-30	Bachelor	Married	Student	Nuclear	<5	>30,000	Rural area	Less accurate	Less Positive	Less frequent	Don't know	Yes	Yes	Yes	No	No	Agree	Agree	Agree	Disagree	Disagree	Agree	No	Yes	Yes	No	Yes	Yes	Yes
142	Male	21-30	Highier education (avobe bachelor)	Married	Student	Nuclear	≥5	>30,000	Rural area	More accurate	Less Positive	Less frequent	Yes	No	Yes	Yes	No	No	Agree	Agree	Agree	Agree	Disagree	Agree	Yes	Yes	No	Yes	No	Yes	Yes
143	Female	>30	Highier education (avobe bachelor)	Married	Non-govt. empolyee	Nuclear	<5	>30,000	Rural area	More accurate	Less Positive	Less frequent	Yes	No	Yes	Yes	Don't know	No	Agree	Agree	Agree	Disagree	Agree	Agree	Yes	Yes	Sometimes	Yes	No	Yes	Yes
144	Female	>30	Highier education (avobe bachelor)	Married	Govt. employee	Nuclear	≥5	>30,000	Rural area	More accurate	Less Positive	Less frequent	Yes	Yes	Yes	Yes	Yes	Yes	Agree	Disagree	Agree	Agree	Agree	Agree	Yes	Yes	Yes	Yes	Yes	Sometimes	No
145	Female	21-30	Highier education (avobe bachelor)	Married	Non-govt. empolyee	Nuclear	<5	>30,000	Rural area	More accurate	Less Positive	Less frequent	Yes	Yes	Yes	Yes	No	No	Agree	Agree	Agree	Agree	Disagree	Agree	Sometimes	Yes	Sometimes	Yes	No	Yes	Yes
146	Male	21-30	Bachelor	Single	Student	Join	≥5	>30,000	Urban area	More accurate	Less Positive	Less frequent	Yes	No	Yes	Yes	No	No	Agree	Disagree	Agree	Agree	Agree	Agree	Yes	Yes	Sometimes	Yes	No	Sometimes	Yes
147	Male	21-30	Intermediate (11-12)	Single	Student	Join	≥5	>30,000	Urban area	More accurate	Less Positive	Less frequent	Yes	No	Yes	Yes	Yes	No	Agree	Agree	Agree	Agree	Disagree	Agree	Sometimes	Yes	Yes	Yes	No	Yes	Yes
148	Male	21-30	Bachelor	Single	Student	Join	≥5	>30,000	Urban area	More accurate	Less Positive	Less frequent	Yes	Yes	Yes	Yes	No	No	Agree	Agree	Agree	Agree	Disagree	Agree	Yes	Yes	Sometimes	Sometimes	No	Sometimes	Yes
149	Male	21-30	Bachelor	Single	Student	Join	≥5	>30,000	Urban area	More accurate	Less Positive	Less frequent	Yes	No	Yes	Yes	Don't know	No	Agree	Agree	Agree	Agree	Disagree	Agree	Sometimes	Yes	Yes	Yes	No	Yes	Yes
150	Male	21-30	Bachelor	Single	Student	Join	≥5	>30,000	Urban area	More accurate	Less Positive	Less frequent	Yes	Yes	Yes	Yes	No	No	Agree	Agree	Agree	Disagree	Disagree	Agree	Yes	Yes	No	No	No	Yes	No
151	Male	21-30	Intermediate (11-12)	Single	Student	Join	≥5	>30,000	Urban area	More accurate	Less Positive	Less frequent	Yes	Yes	Yes	Yes	No	No	Agree	Agree	Agree	Agree	Disagree	Agree	Yes	Yes	Yes	Sometimes	No	Sometimes	Sometimes
152	Male	12-20	Bachelor	Single	Student	Join	≥5	>30,000	Urban area	More accurate	Less Positive	Less frequent	Yes	No	Yes	Yes	Yes	No	Disagree	Agree	Agree	Agree	Agree	Agree	Yes	Yes	Sometimes	Yes	No	Yes	Yes
153	Male	12-20	Bachelor	Single	Student	Join	≥5	>30,000	Rural area	More accurate	Less Positive	Less frequent	Yes	No	Yes	Yes	No	No	Agree	Agree	Agree	Agree	Disagree	Agree	Yes	Yes	No	Yes	No	Yes	Yes
154	Male	>30	Highier education (avobe bachelor)	Single	Non-govt. empolyee	Join	≥5	>30,000	Rural area	More accurate	Less Positive	Less frequent	Yes	No	Yes	Yes	Don't know	Don't know	Agree	Agree	Agree	Agree	Disagree	Agree	Yes	Yes	Sometimes	Yes	No	Yes	Yes
155	Female	12-20	Bachelor	Single	Student	Join	≥5	>30,000	Rural area	More accurate	Less Positive	Less frequent	Yes	Yes	Yes	Yes	Don't know	No	Agree	Agree	Agree	Undecided	Disagree	Agree	Yes	Yes	No	Yes	No	Sometimes	Yes
156	Female	12-20	Bachelor	Single	Student	Join	≥5	>30,000	Urban area	More accurate	Less Positive	Less frequent	Yes	No	Yes	Yes	Yes	No	Agree	Agree	Agree	Agree	Disagree	Agree	Sometimes	Yes	Sometimes	Yes	No	Yes	Yes
157	Female	21-30	Highier education (avobe bachelor)	Single	Govt. employee	Join	<5	>30,000	Rural area	More accurate	Less Positive	Less frequent	Yes	Yes	Yes	Yes	No	No	Agree	Agree	Agree	Agree	Disagree	Agree	Yes	Yes	Sometimes	Yes	No	Yes	Yes
158	Male	21-30	Bachelor	Married	Non-govt. empolyee	Join	<5	>30,000	Rural area	More accurate	Less Positive	Less frequent	Yes	No	Yes	Yes	Yes	No	Agree	Agree	Agree	Agree	Disagree	Agree	Sometimes	Yes	Sometimes	Yes	Yes	Yes	Yes
159	Male	21-30	Highier education (avobe bachelor)	Married	Govt. employee	Join	≥5	>30,000	Urban area	More accurate	Less Positive	Less frequent	Yes	Yes	Yes	Yes	Don't know	No	Agree	Agree	Agree	Agree	Disagree	Agree	Sometimes	Yes	Yes	Yes	No	Yes	Yes
160	Male	21-30	Bachelor	Married	Govt. employee	Join	<5	>30,000	Rural area	More accurate	Less Positive	Less frequent	Yes	No	Yes	Yes	Don't know	No	Agree	Agree	Agree	Disagree	Disagree	Undecided	Yes	Yes	No	Yes	No	Yes	Sometimes
161	Male	>30	Highier education (avobe bachelor)	Married	Govt. employee	Join	≥5	>30,000	Urban area	More accurate	Less Positive	Less frequent	Yes	Yes	Yes	Yes	No	No	Agree	Agree	Agree	Agree	Disagree	Agree	No	Yes	Yes	Yes	No	Yes	Yes
162	Male	21-30	Highier education (avobe bachelor)	Married	Non-govt. empolyee	Join	≥5	>30,000	Rural area	More accurate	Less Positive	Less frequent	Yes	Yes	Yes	Yes	Yes	No	Agree	Agree	Agree	Agree	Agree	Disagree	No	Yes	Sometimes	No	No	Yes	Yes
163	Female	>30	Highier education (avobe bachelor)	Married	Businessman	Join	<5	>30,000	Rural area	More accurate	Less Positive	Less frequent	Yes	Yes	Yes	Yes	No	No	Agree	Agree	Agree	Agree	Disagree	Disagree	Yes	Yes	No	Yes	No	Yes	Yes
164	Male	12-20	Bachelor	Single	Student	Nuclear	<5	<20,000	Rural area	More accurate	Less Positive	Less frequent	Yes	No	Yes	Yes	No	No	Agree	Agree	Agree	Disagree	Disagree	Agree	Sometimes	No	Yes	No	No	Sometimes	No
165	Male	21-30	Bachelor	Married	Govt. employee	Join	≥5	<20,000	Urban area	Less accurate	Less Positive	Less frequent	No	Yes	Yes	Yes	Yes	Yes	Agree	Agree	Agree	Agree	Disagree	Agree	No	No	Sometimes	Sometimes	Yes	No	Sometimes
166	Male	12-20	Bachelor	Single	Student	Join	≥5	20,000-30,000	Urban area	More accurate	Less Positive	Less frequent	Yes	Yes	Yes	Yes	Yes	No	Agree	Agree	Agree	Agree	Disagree	Agree	No	No	No	Yes	No	Sometimes	Sometimes
167	Male	12-20	Intermediate (11-12)	Single	Student	Join	<5	20,000-30,000	Urban area	More accurate	Less Positive	Less frequent	Yes	Don't know	Yes	Yes	No	No	Agree	Agree	Agree	Agree	Disagree	Agree	Yes	No	Sometimes	Yes	No	Sometimes	Yes
168	Male	12-20	Intermediate (11-12)	Single	Student	Nuclear	<5	>30,000	Rural area	More accurate	Less Positive	Less frequent	Yes	No	Yes	Yes	Don't know	No	Agree	Agree	Agree	Undecided	Disagree	Agree	Yes	No	Yes	Yes	No	Yes	Yes
169	Female	21-30	Bachelor	Single	Student	Nuclear	<5	>30,000	Rural area	More accurate	Less Positive	Less frequent	Yes	Yes	Yes	Yes	Yes	No	Disagree	Agree	Agree	Agree	Agree	Agree	No	No	No	No	No	No	No
170	Male	21-30	Bachelor	Single	Student	Nuclear	<5	<20,000	Urban area	More accurate	Less Positive	Less frequent	Yes	No	Yes	Yes	No	No	Agree	Undecided	Agree	Undecided	Disagree	Undecided	Sometimes	Sometimes	Sometimes	Sometimes	Yes	Sometimes	No
171	Male	21-30	Bachelor	Single	Student	Nuclear	<5	<20,000	Urban area	More accurate	Less Positive	Less frequent	Yes	No	Yes	Yes	Yes	No	Agree	Agree	Agree	Agree	Disagree	Agree	Sometimes	Sometimes	Sometimes	Sometimes	No	Sometimes	Sometimes
172	Male	12-20	Bachelor	Single	Student	Nuclear	<5	<20,000	Rural area	More accurate	Less Positive	Less frequent	Yes	Yes	Yes	Yes	Yes	No	Agree	Disagree	Agree	Agree	Disagree	Undecided	Yes	Sometimes	Yes	Yes	No	No	No
173	Male	21-30	Intermediate (11-12)	Single	Student	Nuclear	<5	<20,000	Urban area	More accurate	Less Positive	Less frequent	Yes	No	Yes	Yes	Don't know	No	Agree	Agree	Agree	Agree	Disagree	Agree	Sometimes	Sometimes	Sometimes	Sometimes	No	Sometimes	Yes
174	Male	21-30	Bachelor	Single	Student	Nuclear	≥5	<20,000	Urban area	More accurate	Less Positive	Less frequent	Yes	Yes	Yes	Yes	Yes	No	Agree	Agree	Agree	Agree	Disagree	Agree	Yes	Sometimes	Sometimes	Sometimes	No	Sometimes	Sometimes
175	Male	21-30	Bachelor	Single	Student	Nuclear	≥5	<20,000	Urban area	More accurate	Less Positive	Less frequent	Yes	Yes	Yes	Yes	Yes	No	Agree	Agree	Agree	Agree	Disagree	Agree	Yes	Sometimes	Sometimes	Sometimes	No	Sometimes	Sometimes
176	Male	12-20	Bachelor	Single	Student	Nuclear	≥5	<20,000	Urban area	More accurate	Less Positive	Less frequent	Yes	No	Yes	Yes	Yes	No	Agree	Agree	Agree	Agree	Disagree	Agree	Sometimes	Sometimes	Sometimes	Sometimes	Yes	Yes	Sometimes
177	Male	12-20	Secondary (6-10)	Single	Student	Nuclear	<5	<20,000	Urban area	More accurate	Less Positive	Less frequent	Yes	Don't know	Yes	Yes	Don't know	No	Agree	Agree	Agree	Agree	Disagree	Agree	Sometimes	Sometimes	Sometimes	Sometimes	No	Sometimes	Sometimes
178	Male	21-30	Intermediate (11-12)	Single	Student	Nuclear	<5	<20,000	Urban area	More accurate	Less Positive	Less frequent	Yes	No	Yes	Yes	Don't know	No	Agree	Agree	Agree	Agree	Disagree	Agree	Sometimes	Sometimes	No	Sometimes	Yes	Sometimes	Yes
179	Male	12-20	Bachelor	Single	Student	Nuclear	<5	<20,000	Urban area	More accurate	Less Positive	Less frequent	Yes	No	Yes	Yes	Yes	No	Agree	Agree	Agree	Agree	Disagree	Agree	Sometimes	Sometimes	Yes	Yes	No	Sometimes	Sometimes
180	Female	12-20	Intermediate (11-12)	Single	Student	Nuclear	<5	<20,000	Urban area	More accurate	Less Positive	Less frequent	Yes	No	Yes	Yes	Yes	No	Agree	Agree	Agree	Agree	Disagree	Agree	Yes	Sometimes	Sometimes	Yes	No	Sometimes	Sometimes
181	Female	12-20	Bachelor	Single	Student	Nuclear	<5	<20,000	Rural area	More accurate	Less Positive	Less frequent	Yes	No	Yes	Yes	Yes	Don't know	Agree	Agree	Agree	Agree	Disagree	Agree	Yes	Sometimes	No	Yes	No	Yes	Yes
182	Male	21-30	Bachelor	Single	Student	Join	≥5	<20,000	Urban area	More accurate	Less Positive	Less frequent	Yes	Yes	Yes	Yes	No	No	Agree	Agree	Agree	Agree	Disagree	Agree	Sometimes	Sometimes	Yes	Yes	No	Yes	Yes
183	Male	12-20	Bachelor	Single	Student	Nuclear	<5	20,000-30,000	Urban area	More accurate	Less Positive	Less frequent	Yes	Yes	Yes	Yes	No	No	Agree	Agree	Agree	Agree	Disagree	Agree	No	Sometimes	No	Yes	No	Yes	Sometimes
184	Male	12-20	Intermediate (11-12)	Single	Student	Nuclear	≥5	20,000-30,000	Rural area	Less accurate	Less Positive	Less frequent	Yes	Yes	Yes	Yes	No	Yes	Agree	Agree	Agree	Agree	Disagree	Agree	Yes	Sometimes	Yes	Yes	No	Yes	Yes
185	Female	21-30	Bachelor	Single	Student	Nuclear	≥5	20,000-30,000	Rural area	More accurate	Less Positive	Less frequent	Yes	No	Yes	Yes	No	No	Agree	Agree	Agree	Agree	Disagree	Agree	Sometimes	Sometimes	Yes	Yes	Yes	Yes	Yes
186	Male	12-20	Intermediate (11-12)	Single	Student	Join	≥5	20,000-30,000	Urban area	More accurate	Less Positive	Less frequent	Yes	No	Yes	Yes	Yes	No	Agree	Agree	Agree	Agree	Disagree	Agree	No	Sometimes	Sometimes	Yes	No	Yes	Yes
187	Male	21-30	Bachelor	Single	Student	Nuclear	<5	>30,000	Rural area	Less accurate	Less Positive	Less frequent	Yes	Don't know	Yes	Yes	No	Don't know	Agree	Agree	Agree	Undecided	Disagree	Agree	No	Sometimes	Sometimes	No	No	Sometimes	Sometimes
188	Female	12-20	Bachelor	Single	Student	Nuclear	<5	>30,000	Urban area	More accurate	Less Positive	Less frequent	Yes	No	Yes	Yes	Yes	No	Agree	Agree	Agree	Agree	Disagree	Agree	Sometimes	Sometimes	No	Yes	No	Yes	Yes
189	Female	21-30	Bachelor	Single	Student	Nuclear	≥5	>30,000	Rural area	More accurate	Less Positive	Less frequent	Yes	Yes	Yes	Yes	Yes	No	Agree	Agree	Agree	Agree	Disagree	Agree	Sometimes	Sometimes	Sometimes	Yes	Yes	Yes	Yes
190	Male	21-30	Highier education (avobe bachelor)	Married	Non-govt. empolyee	Join	≥5	>30,000	Rural area	More accurate	Less Positive	Less frequent	Yes	No	Yes	Yes	Yes	No	Agree	Agree	Agree	Disagree	Disagree	Agree	Sometimes	Sometimes	Sometimes	Yes	No	Yes	Sometimes
191	Female	21-30	Bachelor	Married	Student	Join	≥5	>30,000	Rural area	More accurate	Less Positive	Less frequent	Yes	Yes	Yes	Yes	Yes	Don't know	Agree	Agree	Agree	Undecided	Undecided	Agree	Yes	Sometimes	No	Sometimes	No	Sometimes	Sometimes
192	Male	21-30	Bachelor	Divorced	Non-govt. empolyee	Join	<5	>30,000	Rural area	More accurate	Less Positive	Less frequent	Yes	No	Yes	Yes	Yes	No	Agree	Agree	Agree	Agree	Disagree	Agree	Sometimes	Sometimes	Sometimes	Yes	Yes	Yes	Yes
193	Male	21-30	Bachelor	Single	Student	Nuclear	≥5	<20,000	Urban area	More accurate	Less Positive	More frequent	Yes	Yes	Yes	Yes	Yes	No	Agree	Agree	Agree	Agree	Disagree	Agree	Yes	Yes	Yes	Yes	No	Yes	Yes
194	Male	12-20	Bachelor	Single	Student	Nuclear	≥5	<20,000	Urban area	More accurate	Less Positive	More frequent	Yes	No	Yes	Yes	No	No	Agree	Agree	Agree	Agree	Disagree	Agree	Yes	Yes	Yes	Yes	Yes	Yes	Yes
195	Male	21-30	Highier education (avobe bachelor)	Single	Student	Nuclear	<5	<20,000	Rural area	More accurate	Less Positive	More frequent	Yes	No	Yes	Yes	Yes	No	Agree	Agree	Agree	Agree	Disagree	Agree	Yes	Yes	Yes	Yes	No	Yes	Yes
196	Male	21-30	Bachelor	Single	Student	Nuclear	<5	<20,000	Rural area	More accurate	Less Positive	More frequent	Yes	No	Yes	Yes	No	No	Agree	Agree	Agree	Agree	Disagree	Agree	Yes	Yes	Yes	Yes	No	Yes	Yes
197	Male	12-20	Bachelor	Single	Student	Nuclear	<5	<20,000	Urban area	More accurate	Less Positive	More frequent	Yes	No	Yes	Yes	Yes	No	Agree	Agree	Agree	Agree	Disagree	Agree	Yes	Yes	Yes	Yes	No	Yes	Yes
198	Male	21-30	Bachelor	Single	Student	Nuclear	≥5	<20,000	Urban area	More accurate	Less Positive	More frequent	Yes	Yes	Yes	Yes	Yes	No	Agree	Agree	Disagree	Agree	Agree	Agree	Yes	Yes	Yes	Yes	No	Yes	Yes
199	Male	21-30	Intermediate (11-12)	Single	Student	Nuclear	≥5	<20,000	Urban area	More accurate	Less Positive	More frequent	Yes	No	Yes	Yes	Don't know	No	Agree	Agree	Agree	Undecided	Disagree	Agree	Yes	Yes	Yes	Yes	No	Yes	Yes
200	Male	21-30	Bachelor	Single	Student	Nuclear	<5	<20,000	Urban area	More accurate	Less Positive	More frequent	Yes	No	Yes	Yes	No	No	Agree	Agree	Agree	Agree	Disagree	Agree	Yes	Yes	Yes	No	Yes	Yes	Yes
201	Male	21-30	Intermediate (11-12)	Single	Student	Nuclear	≥5	<20,000	Urban area	More accurate	Less Positive	More frequent	Yes	No	Yes	Yes	No	No	Agree	Agree	Agree	Agree	Agree	Disagree	Yes	Yes	Yes	Yes	No	Yes	Yes
202	Male	12-20	Intermediate (11-12)	Single	Student	Nuclear	≥5	<20,000	Rural area	Less accurate	Less Positive	More frequent	No	Yes	Yes	Yes	No	No	Agree	Agree	Agree	Agree	Disagree	Agree	Yes	Yes	Yes	Yes	Yes	Yes	Yes
203	Male	12-20	Bachelor	Single	Student	Nuclear	≥5	<20,000	Rural area	More accurate	Less Positive	More frequent	Yes	Yes	Yes	Yes	No	No	Agree	Agree	Agree	Agree	Disagree	Agree	Yes	Yes	Yes	Yes	Yes	Yes	Yes
204	Male	12-20	Bachelor	Single	Student	Nuclear	<5	<20,000	Urban area	More accurate	Less Positive	More frequent	Yes	Yes	Yes	Yes	No	No	Agree	Agree	Agree	Agree	Disagree	Agree	Yes	Yes	Yes	Yes	No	Yes	Yes
205	Male	12-20	Bachelor	Single	Student	Nuclear	<5	<20,000	Urban area	More accurate	Less Positive	More frequent	Yes	Yes	Yes	Yes	No	No	Agree	Agree	Agree	Agree	Disagree	Agree	Yes	Yes	Yes	Yes	No	Yes	Yes
206	Male	21-30	Bachelor	Single	Student	Nuclear	<5	<20,000	Rural area	More accurate	Less Positive	More frequent	Yes	No	Yes	Yes	Yes	No	Agree	Agree	Agree	Agree	Disagree	Agree	Yes	Yes	Yes	Yes	No	Yes	Yes
207	Male	21-30	Bachelor	Single	Student	Nuclear	<5	<20,000	Urban area	More accurate	Less Positive	More frequent	Yes	Yes	Yes	Yes	Yes	No	Agree	Agree	Agree	Agree	Disagree	Agree	Yes	Yes	Yes	Yes	Yes	Yes	Yes
208	Male	21-30	Bachelor	Single	Govt. employee	Nuclear	<5	<20,000	Rural area	More accurate	Less Positive	More frequent	Yes	Yes	Yes	Yes	No	No	Agree	Agree	Agree	Agree	Disagree	Agree	Yes	Yes	Yes	Yes	No	Yes	Yes
209	Male	21-30	Bachelor	Single	Student	Nuclear	≥5	<20,000	Urban area	More accurate	Less Positive	More frequent	Yes	Don't know	Yes	Yes	Yes	No	Agree	Agree	Agree	Agree	Disagree	Agree	Yes	Yes	Yes	Yes	Yes	Yes	Yes
210	Male	21-30	Bachelor	Single	Student	Nuclear	<5	<20,000	Rural area	More accurate	Less Positive	More frequent	Yes	No	Yes	Yes	Don't know	Don't know	Agree	Agree	Agree	Agree	Disagree	Agree	Yes	Yes	Yes	Yes	Yes	Yes	Yes
211	Male	12-20	Secondary (6-10)	Single	Student	Nuclear	<5	<20,000	Urban area	More accurate	Less Positive	More frequent	Yes	Yes	Yes	Yes	Yes	No	Agree	Agree	Agree	Agree	Disagree	Agree	Yes	Yes	Yes	Yes	No	Yes	Yes
212	Male	21-30	Bachelor	Single	Student	Nuclear	≥5	<20,000	Urban area	More accurate	Less Positive	More frequent	Yes	No	Yes	Yes	No	No	Agree	Agree	Agree	Agree	Disagree	Agree	Yes	Yes	Yes	Yes	No	Yes	Yes
213	Male	12-20	Bachelor	Single	Student	Nuclear	<5	<20,000	Rural area	More accurate	Less Positive	More frequent	Yes	No	Yes	Yes	Yes	No	Agree	Agree	Agree	Agree	Agree	Disagree	Yes	Yes	Yes	Yes	No	Yes	Yes
214	Female	12-20	Intermediate (11-12)	Single	Student	Nuclear	<5	<20,000	Urban area	More accurate	Less Positive	More frequent	Yes	Yes	Yes	Yes	Yes	No	Agree	Agree	Agree	Agree	Disagree	Agree	Yes	Yes	Yes	Yes	No	Yes	Yes
215	Female	21-30	Bachelor	Single	Student	Nuclear	<5	<20,000	Rural area	More accurate	Less Positive	More frequent	Yes	No	Yes	Yes	Yes	No	Agree	Agree	Agree	Agree	Disagree	Agree	Yes	Yes	Yes	Yes	Yes	Yes	Yes
216	Female	12-20	Bachelor	Single	Student	Nuclear	<5	<20,000	Rural area	More accurate	Less Positive	More frequent	Yes	Don't know	Yes	Yes	Don't know	No	Agree	Agree	Agree	Undecided	Undecided	Agree	Yes	Yes	Yes	Yes	No	Yes	Yes
217	Female	12-20	Intermediate (11-12)	Single	Student	Nuclear	<5	<20,000	Rural area	More accurate	Less Positive	More frequent	Yes	Yes	Yes	Yes	No	No	Agree	Agree	Agree	Agree	Disagree	Agree	Yes	Yes	Yes	Yes	No	Yes	Yes
218	Female	21-30	Bachelor	Single	Student	Nuclear	≥5	<20,000	Rural area	More accurate	Less Positive	More frequent	Yes	No	Yes	Yes	Yes	No	Agree	Agree	Agree	Agree	Disagree	Agree	Yes	Yes	Yes	Yes	No	Yes	Yes
219	Female	12-20	Bachelor	Single	Student	Nuclear	<5	<20,000	Urban area	More accurate	Less Positive	More frequent	Yes	Yes	Yes	Yes	Yes	Don't know	Agree	Agree	Agree	Undecided	Undecided	Agree	Yes	Yes	Yes	Yes	No	Yes	Yes
220	Female	12-20	Bachelor	Single	Student	Nuclear	<5	<20,000	Rural area	More accurate	Less Positive	More frequent	Yes	No	Yes	Yes	No	Don't know	Agree	Agree	Agree	Agree	Disagree	Agree	Yes	Yes	Yes	Yes	Yes	Yes	Yes
221	Female	12-20	Bachelor	Single	Student	Nuclear	<5	<20,000	Rural area	More accurate	Less Positive	More frequent	Yes	No	Yes	Yes	Don't know	No	Agree	Agree	Agree	Agree	Disagree	Agree	Yes	Yes	Yes	Yes	No	Yes	Yes
222	Male	21-30	Highier education (avobe bachelor)	Married	Non-govt. empolyee	Nuclear	<5	<20,000	Rural area	More accurate	Less Positive	More frequent	Yes	No	Yes	Yes	Yes	No	Agree	Agree	Agree	Agree	Disagree	Agree	Yes	Yes	Yes	Yes	Yes	Yes	Yes
223	Male	>30	Bachelor	Married	Non-govt. empolyee	Nuclear	<5	<20,000	Rural area	More accurate	Less Positive	More frequent	Yes	No	Yes	Yes	Yes	Don't know	Agree	Agree	Agree	Agree	Disagree	Disagree	Yes	Yes	Yes	Yes	No	Yes	Yes
224	Male	21-30	Bachelor	Married	Businessman	Nuclear	<5	<20,000	Rural area	More accurate	Less Positive	More frequent	Yes	No	Yes	Yes	No	No	Agree	Agree	Agree	Agree	Disagree	Agree	Yes	Yes	Yes	Yes	No	Yes	Yes
225	Female	12-20	Bachelor	Married	Student	Nuclear	≥5	<20,000	Urban area	More accurate	Less Positive	More frequent	Yes	Yes	Yes	Yes	No	No	Agree	Agree	Agree	Agree	Disagree	Agree	Yes	Yes	Yes	Yes	No	Yes	Yes
226	Female	21-30	Bachelor	Married	Student	Nuclear	<5	<20,000	Urban area	More accurate	Less Positive	More frequent	Yes	No	Yes	Yes	No	No	Agree	Agree	Agree	Undecided	Disagree	Agree	Yes	Yes	Yes	Yes	Yes	Yes	Yes
227	Female	21-30	Bachelor	Married	Student	Nuclear	<5	<20,000	Rural area	More accurate	Less Positive	More frequent	Yes	Don't know	Yes	Yes	Yes	No	Agree	Agree	Agree	Agree	Disagree	Agree	Yes	Yes	Yes	Yes	No	Yes	Yes
228	Male	12-20	Bachelor	Single	Student	Join	≥5	<20,000	Urban area	More accurate	Less Positive	More frequent	Yes	No	Yes	Yes	No	No	Agree	Agree	Agree	Agree	Disagree	Agree	Yes	Yes	Yes	Yes	No	Yes	Yes
229	Male	21-30	Bachelor	Single	Student	Join	≥5	<20,000	Urban area	More accurate	Less Positive	More frequent	Yes	No	Yes	Yes	Yes	No	Agree	Agree	Agree	Agree	Disagree	Agree	Yes	Yes	Yes	Yes	Yes	Yes	Yes
230	Male	21-30	Highier education (avobe bachelor)	Single	Student	Join	≥5	<20,000	Rural area	More accurate	Less Positive	More frequent	Yes	No	Yes	Yes	No	No	Agree	Agree	Agree	Agree	Disagree	Agree	Yes	Yes	Sometimes	Yes	Yes	Yes	Yes
231	Male	21-30	Bachelor	Single	Student	Join	≥5	<20,000	Rural area	More accurate	Less Positive	More frequent	Yes	No	Yes	Yes	Yes	No	Agree	Agree	Agree	Agree	Disagree	Agree	Yes	Yes	Yes	Yes	Yes	Yes	Yes
232	Male	12-20	Intermediate (11-12)	Single	Student	Join	<5	<20,000	Urban area	More accurate	Less Positive	More frequent	Yes	No	Yes	Yes	No	No	Agree	Agree	Agree	Agree	Disagree	Agree	Yes	Yes	Yes	Yes	Yes	Yes	Yes
233	Male	21-30	Intermediate (11-12)	Single	Student	Join	≥5	<20,000	Urban area	More accurate	Less Positive	More frequent	Yes	Yes	Yes	Yes	Don't know	No	Agree	Agree	Agree	Agree	Disagree	Agree	Sometimes	Yes	Yes	Yes	Yes	Yes	Yes
234	Male	12-20	Intermediate (11-12)	Single	Unemployment	Join	<5	<20,000	Urban area	More accurate	Less Positive	More frequent	Yes	Don't know	Yes	Yes	Yes	No	Agree	Agree	Agree	Agree	Disagree	Agree	Yes	Yes	Yes	Yes	No	Yes	Yes
235	Male	21-30	Highier education (avobe bachelor)	Single	Student	Join	≥5	<20,000	Urban area	More accurate	Less Positive	More frequent	Yes	Yes	Yes	Yes	No	No	Agree	Agree	Agree	Agree	Disagree	Agree	Yes	Yes	Yes	Yes	No	Yes	Yes
236	Female	12-20	Intermediate (11-12)	Single	Student	Join	<5	<20,000	Rural area	More accurate	Less Positive	More frequent	Yes	No	Yes	Yes	Yes	No	Agree	Agree	Agree	Agree	Disagree	Agree	Yes	Yes	Yes	Yes	No	Yes	Yes
237	Female	21-30	Bachelor	Single	Student	Join	≥5	<20,000	Urban area	More accurate	Less Positive	More frequent	Yes	Yes	Yes	Yes	No	No	Agree	Agree	Agree	Agree	Undecided	Undecided	Yes	Yes	Yes	Yes	Yes	Yes	Yes
238	Male	21-30	Highier education (avobe bachelor)	Single	Student	Nuclear	<5	20,000-30,000	Rural area	More accurate	Less Positive	More frequent	Yes	No	Yes	Yes	Yes	No	Agree	Agree	Agree	Agree	Disagree	Agree	Yes	Yes	Yes	Yes	Yes	Yes	Yes
239	Male	12-20	Bachelor	Single	Student	Nuclear	<5	20,000-30,000	Rural area	More accurate	Less Positive	More frequent	Yes	No	Yes	Yes	No	No	Agree	Agree	Agree	Agree	Disagree	Agree	Yes	Yes	Yes	Yes	No	Yes	Yes
240	Male	12-20	Bachelor	Single	Student	Nuclear	<5	20,000-30,000	Rural area	More accurate	Less Positive	More frequent	Yes	No	Yes	Yes	Yes	No	Agree	Agree	Agree	Disagree	Disagree	Agree	Yes	Yes	Yes	Yes	No	Yes	Yes
241	Male	21-30	Bachelor	Single	Student	Nuclear	<5	20,000-30,000	Urban area	More accurate	Less Positive	More frequent	Yes	No	Yes	Yes	Yes	No	Agree	Agree	Agree	Agree	Disagree	Agree	Yes	Yes	Yes	Yes	No	Yes	Yes
242	Male	21-30	Bachelor	Single	Student	Nuclear	<5	20,000-30,000	Rural area	More accurate	Less Positive	More frequent	Yes	No	Yes	Yes	Yes	No	Agree	Agree	Agree	Agree	Disagree	Agree	Yes	Yes	Yes	Yes	Yes	Yes	Yes
243	Male	21-30	Bachelor	Single	Student	Nuclear	<5	20,000-30,000	Rural area	More accurate	Less Positive	More frequent	Yes	Yes	Yes	Yes	Don't know	No	Agree	Agree	Agree	Agree	Disagree	Agree	Yes	Yes	Yes	Yes	Yes	Yes	Yes
244	Male	21-30	Bachelor	Single	Student	Nuclear	<5	20,000-30,000	Urban area	More accurate	Less Positive	More frequent	Yes	No	Yes	Yes	Yes	No	Agree	Agree	Agree	Agree	Disagree	Agree	Yes	Yes	Yes	Yes	Yes	Yes	Yes
245	Male	12-20	Bachelor	Single	Student	Nuclear	<5	20,000-30,000	Urban area	More accurate	Less Positive	More frequent	Yes	No	Yes	Yes	Yes	No	Agree	Agree	Agree	Agree	Disagree	Agree	Yes	Yes	Yes	Yes	No	Yes	Yes
246	Male	12-20	Intermediate (11-12)	Single	Student	Nuclear	<5	20,000-30,000	Rural area	More accurate	Less Positive	More frequent	Yes	Yes	Yes	Yes	Yes	No	Agree	Agree	Agree	Agree	Disagree	Agree	Yes	Yes	Yes	Yes	No	Yes	Yes
247	Male	21-30	Bachelor	Single	Student	Nuclear	<5	20,000-30,000	Urban area	More accurate	Less Positive	More frequent	Yes	Yes	Yes	Yes	Yes	No	Agree	Agree	Agree	Agree	Disagree	Agree	Yes	Yes	Yes	Yes	Yes	Yes	Yes
248	Male	21-30	Bachelor	Single	Student	Nuclear	<5	20,000-30,000	Rural area	More accurate	Less Positive	More frequent	Yes	No	Yes	Yes	No	No	Disagree	Agree	Agree	Agree	Disagree	Agree	Yes	Yes	Yes	Yes	Yes	Yes	Yes
249	Male	21-30	Intermediate (11-12)	Single	Non-govt. empolyee	Nuclear	<5	20,000-30,000	Rural area	More accurate	Less Positive	More frequent	Yes	Yes	Yes	Yes	Yes	No	Agree	Agree	Agree	Agree	Disagree	Agree	Yes	Yes	Yes	Yes	Yes	Yes	Yes
250	Male	21-30	Intermediate (11-12)	Single	Student	Nuclear	<5	20,000-30,000	Rural area	More accurate	Less Positive	More frequent	Yes	Yes	Yes	Yes	Yes	No	Agree	Agree	Agree	Agree	Disagree	Agree	Yes	Yes	Yes	Yes	No	Yes	Yes
251	Male	21-30	Bachelor	Single	Student	Nuclear	<5	20,000-30,000	Urban area	More accurate	Less Positive	More frequent	Yes	Don't know	Yes	Yes	Don't know	No	Agree	Agree	Agree	Undecided	Disagree	Undecided	Yes	Yes	Yes	Yes	No	Yes	Yes
252	Male	21-30	Bachelor	Single	Student	Nuclear	<5	20,000-30,000	Urban area	More accurate	Less Positive	More frequent	Yes	No	Yes	Yes	No	No	Agree	Agree	Agree	Disagree	Agree	Agree	Yes	Yes	Yes	Yes	No	Yes	Yes
253	Male	21-30	Intermediate (11-12)	Single	Student	Nuclear	<5	20,000-30,000	Rural area	More accurate	Less Positive	More frequent	Yes	No	Yes	Yes	No	No	Agree	Agree	Agree	Disagree	Disagree	Agree	Yes	Yes	Yes	Yes	No	Yes	Yes
254	Male	21-30	Bachelor	Single	Student	Nuclear	<5	20,000-30,000	Urban area	More accurate	Less Positive	More frequent	Yes	Yes	Yes	Yes	No	No	Agree	Agree	Agree	Agree	Disagree	Agree	Yes	Yes	Sometimes	Yes	Yes	Yes	Yes
255	Male	12-20	Intermediate (11-12)	Single	Student	Nuclear	<5	20,000-30,000	Rural area	More accurate	Less Positive	More frequent	Yes	No	Yes	Yes	Yes	No	Agree	Agree	Agree	Agree	Disagree	Agree	Yes	Yes	Yes	Yes	No	Yes	Yes
256	Male	12-20	Bachelor	Single	Student	Nuclear	<5	20,000-30,000	Rural area	More accurate	Less Positive	More frequent	Yes	No	Yes	Yes	No	No	Agree	Agree	Agree	Agree	Disagree	Agree	Yes	Yes	Yes	Yes	No	Yes	Yes
257	Male	21-30	Bachelor	Single	Student	Nuclear	≥5	20,000-30,000	Rural area	More accurate	Less Positive	More frequent	Yes	Don't know	Yes	Yes	Yes	No	Agree	Agree	Agree	Agree	Disagree	Agree	Yes	Yes	Yes	Yes	No	Yes	Yes
258	Male	12-20	Intermediate (11-12)	Single	Student	Nuclear	<5	20,000-30,000	Rural area	More accurate	Less Positive	More frequent	Yes	No	Yes	Yes	Yes	No	Agree	Agree	Agree	Disagree	Agree	Agree	Yes	Yes	Yes	Yes	Yes	Yes	Yes
259	Male	12-20	Bachelor	Single	Student	Nuclear	≥5	20,000-30,000	Urban area	More accurate	Less Positive	More frequent	Yes	Yes	Yes	Yes	No	No	Agree	Agree	Agree	Disagree	Agree	Agree	Yes	Yes	Yes	Yes	Yes	Yes	Yes
260	Male	21-30	Intermediate (11-12)	Single	Non-govt. empolyee	Nuclear	<5	20,000-30,000	Rural area	More accurate	Less Positive	More frequent	Yes	Yes	Yes	Yes	Don't know	No	Agree	Agree	Agree	Agree	Disagree	Agree	Yes	Yes	Yes	Yes	No	Yes	Yes
261	Male	12-20	Intermediate (11-12)	Single	Student	Nuclear	<5	20,000-30,000	Rural area	More accurate	Less Positive	More frequent	Yes	No	Yes	Yes	No	No	Agree	Agree	Agree	Agree	Disagree	Agree	Yes	Yes	Yes	Yes	No	Yes	Yes
262	Male	12-20	Bachelor	Single	Student	Nuclear	<5	20,000-30,000	Rural area	More accurate	Less Positive	More frequent	Yes	No	Yes	Yes	No	No	Agree	Agree	Agree	Agree	Disagree	Agree	Yes	Yes	Yes	Yes	No	Yes	Yes
263	Male	12-20	Intermediate (11-12)	Single	Student	Nuclear	<5	20,000-30,000	Urban area	More accurate	Less Positive	More frequent	Yes	Yes	Yes	Yes	Yes	No	Agree	Agree	Agree	Agree	Disagree	Agree	Yes	Yes	Yes	Yes	No	Yes	Yes
264	Male	21-30	Highier education (avobe bachelor)	Single	Student	Nuclear	≥5	20,000-30,000	Rural area	Less accurate	Less Positive	More frequent	Yes	Yes	Yes	Yes	Don't know	Yes	Agree	Agree	Agree	Agree	Disagree	Undecided	Yes	Yes	Yes	Yes	Yes	Yes	Yes
265	Male	21-30	Highier education (avobe bachelor)	Single	Non-govt. empolyee	Nuclear	<5	20,000-30,000	Rural area	More accurate	Less Positive	More frequent	Yes	Yes	Yes	Yes	Don't know	No	Agree	Agree	Agree	Agree	Disagree	Agree	Yes	Yes	Yes	Yes	Yes	Yes	Yes
266	Female	21-30	Bachelor	Single	Student	Nuclear	<5	20,000-30,000	Rural area	More accurate	Less Positive	More frequent	Yes	No	Yes	Yes	No	No	Agree	Agree	Agree	Agree	Disagree	Agree	Yes	Yes	Yes	Yes	Yes	Yes	Yes
267	Female	12-20	Bachelor	Single	Student	Nuclear	<5	20,000-30,000	Urban area	More accurate	Less Positive	More frequent	Yes	No	Yes	Yes	No	Yes	Agree	Agree	Agree	Agree	Disagree	Agree	Yes	Yes	Yes	Yes	Yes	Yes	Yes
268	Female	12-20	Bachelor	Single	Student	Nuclear	≥5	20,000-30,000	Rural area	More accurate	Less Positive	More frequent	Yes	Yes	Yes	Yes	Yes	No	Agree	Agree	Agree	Agree	Disagree	Agree	Yes	Yes	Sometimes	Yes	Yes	Yes	Yes
269	Female	21-30	Bachelor	Single	Student	Nuclear	<5	20,000-30,000	Urban area	More accurate	Less Positive	More frequent	Yes	No	Yes	Yes	Yes	No	Agree	Agree	Agree	Agree	Disagree	Agree	Sometimes	Yes	Yes	Yes	Yes	Yes	Yes
270	Female	12-20	Bachelor	Single	Student	Nuclear	<5	20,000-30,000	Rural area	More accurate	Less Positive	More frequent	Yes	Yes	Yes	Yes	Yes	No	Agree	Agree	Agree	Agree	Disagree	Agree	Yes	Yes	Yes	Yes	Yes	Yes	Yes
271	Female	21-30	Bachelor	Single	Student	Nuclear	≥5	20,000-30,000	Rural area	More accurate	Less Positive	More frequent	Yes	Yes	Yes	Yes	Yes	No	Agree	Agree	Agree	Agree	Undecided	Undecided	Yes	Yes	Yes	Yes	Yes	Yes	Yes
272	Female	12-20	Bachelor	Single	Student	Nuclear	<5	20,000-30,000	Urban area	More accurate	Less Positive	More frequent	Yes	Don't know	Yes	Yes	No	No	Agree	Agree	Agree	Agree	Disagree	Agree	Yes	Yes	Yes	Yes	No	Yes	Yes
273	Female	21-30	Highier education (avobe bachelor)	Single	Govt. employee	Nuclear	<5	20,000-30,000	Rural area	More accurate	Less Positive	More frequent	Yes	Yes	Yes	Yes	No	No	Agree	Agree	Agree	Disagree	Agree	Agree	Yes	Yes	Yes	Yes	No	Yes	Yes
274	Female	21-30	Bachelor	Single	Unemployment	Nuclear	<5	20,000-30,000	Rural area	More accurate	Less Positive	More frequent	Yes	Yes	Yes	Yes	No	No	Agree	Agree	Agree	Agree	Disagree	Agree	Yes	Yes	Sometimes	Yes	Yes	Yes	Yes
275	Female	12-20	Bachelor	Single	Student	Nuclear	<5	20,000-30,000	Rural area	More accurate	Less Positive	More frequent	Yes	Yes	Yes	Yes	No	No	Agree	Agree	Agree	Agree	Disagree	Agree	Yes	Yes	Yes	Yes	Yes	Yes	Yes
276	Female	12-20	Intermediate (11-12)	Single	Student	Nuclear	<5	20,000-30,000	Rural area	More accurate	Less Positive	More frequent	Yes	No	Yes	Yes	No	No	Agree	Agree	Agree	Undecided	Disagree	Agree	Yes	Yes	Yes	Yes	No	Yes	Yes
277	Male	21-30	Highier education (avobe bachelor)	Married	Student	Nuclear	<5	20,000-30,000	Urban area	More accurate	Less Positive	More frequent	Yes	Yes	Yes	Yes	No	No	Agree	Agree	Agree	Agree	Disagree	Agree	Yes	Yes	Yes	Yes	Yes	Yes	Yes
278	Male	21-30	Highier education (avobe bachelor)	Married	Non-govt. empolyee	Nuclear	<5	20,000-30,000	Rural area	More accurate	Less Positive	More frequent	Yes	Yes	Yes	Yes	No	No	Agree	Agree	Agree	Agree	Disagree	Agree	Yes	Yes	Yes	Yes	Yes	Yes	Yes
279	Female	21-30	Bachelor	Married	Student	Nuclear	<5	20,000-30,000	Rural area	More accurate	Less Positive	More frequent	Yes	Yes	Yes	Yes	No	No	Agree	Agree	Agree	Agree	Disagree	Agree	Yes	Yes	Yes	Yes	No	Yes	Yes
280	Male	21-30	Bachelor	Single	Student	Join	<5	20,000-30,000	Rural area	More accurate	Less Positive	More frequent	Yes	Yes	Yes	Yes	No	No	Agree	Agree	Agree	Agree	Disagree	Agree	Yes	Yes	Yes	Yes	No	Yes	Yes
281	Male	12-20	Intermediate (11-12)	Single	Student	Join	≥5	20,000-30,000	Rural area	More accurate	Less Positive	More frequent	Yes	Yes	Yes	Yes	Yes	No	Agree	Agree	Agree	Agree	Disagree	Agree	Yes	Yes	Yes	Yes	No	Yes	Yes
282	Male	21-30	Bachelor	Single	Student	Join	<5	20,000-30,000	Rural area	More accurate	Less Positive	More frequent	Yes	No	Yes	Yes	Yes	No	Agree	Agree	Agree	Agree	Disagree	Agree	Yes	Yes	Yes	Yes	Yes	Yes	Yes
283	Male	21-30	Highier education (avobe bachelor)	Single	Non-govt. empolyee	Join	<5	20,000-30,000	Rural area	More accurate	Less Positive	More frequent	Yes	No	Yes	Yes	No	No	Agree	Agree	Agree	Agree	Disagree	Agree	Yes	Yes	Yes	Yes	Yes	Yes	Yes
284	Male	21-30	Highier education (avobe bachelor)	Single	Non-govt. empolyee	Join	<5	20,000-30,000	Rural area	More accurate	Less Positive	More frequent	Yes	No	Yes	Yes	No	No	Agree	Agree	Agree	Agree	Disagree	Agree	Yes	Yes	Yes	Yes	Yes	Yes	Yes
285	Male	21-30	Bachelor	Single	Non-govt. empolyee	Join	<5	20,000-30,000	Rural area	More accurate	Less Positive	More frequent	Yes	No	Yes	Yes	No	No	Agree	Agree	Agree	Agree	Disagree	Agree	Yes	Yes	Yes	Yes	Yes	Yes	Yes
286	Male	21-30	Highier education (avobe bachelor)	Single	Student	Join	≥5	20,000-30,000	Rural area	More accurate	Less Positive	More frequent	Yes	Yes	Yes	Yes	Yes	No	Agree	Agree	Agree	Disagree	Agree	Agree	Yes	Yes	Yes	Yes	No	Yes	Yes
287	Female	21-30	Highier education (avobe bachelor)	Married	Non-govt. empolyee	Join	<5	20,000-30,000	Rural area	More accurate	Less Positive	More frequent	Yes	Yes	Yes	Yes	No	No	Agree	Agree	Agree	Agree	Disagree	Agree	Yes	Yes	Yes	Yes	No	Yes	Yes
288	Male	12-20	Bachelor	Single	Student	Nuclear	<5	>30,000	Rural area	More accurate	Less Positive	More frequent	Yes	No	Yes	Yes	Yes	No	Agree	Agree	Agree	Agree	Disagree	Agree	Yes	Yes	Yes	Yes	No	Yes	Yes
289	Male	12-20	Bachelor	Single	Student	Nuclear	<5	>30,000	Rural area	More accurate	Less Positive	More frequent	Yes	Yes	Yes	Yes	Yes	No	Agree	Agree	Agree	Agree	Disagree	Agree	Yes	Yes	Yes	Yes	No	Yes	Yes
290	Male	21-30	Bachelor	Single	Student	Nuclear	<5	>30,000	Rural area	More accurate	Less Positive	More frequent	Yes	No	Yes	Yes	No	Yes	Agree	Agree	Agree	Disagree	Agree	Agree	Yes	Yes	Yes	Yes	Yes	Yes	Sometimes
291	Male	12-20	Bachelor	Single	Student	Nuclear	<5	>30,000	Rural area	More accurate	Less Positive	More frequent	Yes	Yes	Yes	Yes	No	No	Agree	Agree	Agree	Agree	Disagree	Agree	Yes	Yes	Yes	Yes	No	Yes	Yes
292	Male	21-30	Bachelor	Single	Student	Nuclear	<5	>30,000	Rural area	More accurate	Less Positive	More frequent	Yes	No	Yes	Yes	No	No	Agree	Agree	Agree	Agree	Disagree	Agree	Yes	Yes	Yes	Yes	No	Yes	Yes
293	Male	21-30	Bachelor	Single	Student	Nuclear	<5	>30,000	Rural area	More accurate	Less Positive	More frequent	Yes	No	Yes	Yes	Yes	No	Agree	Agree	Agree	Agree	Disagree	Agree	Yes	Yes	Yes	Yes	No	Yes	Yes
294	Male	21-30	Highier education (avobe bachelor)	Single	Non-govt. empolyee	Nuclear	<5	>30,000	Rural area	More accurate	Less Positive	More frequent	Yes	Yes	Yes	Yes	Don't know	No	Agree	Agree	Agree	Disagree	Disagree	Agree	Yes	Yes	Yes	Yes	Yes	Yes	Yes
295	Male	21-30	Bachelor	Single	Student	Nuclear	<5	>30,000	Rural area	More accurate	Less Positive	More frequent	Yes	No	Yes	Yes	Don't know	No	Agree	Agree	Agree	Disagree	Agree	Agree	Yes	Yes	Yes	Yes	Yes	No	Yes
296	Male	12-20	Bachelor	Single	Student	Nuclear	<5	>30,000	Rural area	More accurate	Less Positive	More frequent	Yes	Yes	Yes	Yes	Don't know	No	Agree	Agree	Agree	Agree	Disagree	Agree	Yes	Yes	Yes	Yes	No	Yes	Yes
297	Male	21-30	Highier education (avobe bachelor)	Single	Student	Nuclear	<5	>30,000	Rural area	More accurate	Less Positive	More frequent	Yes	Yes	Yes	Yes	Yes	No	Agree	Agree	Agree	Disagree	Disagree	Disagree	Yes	Yes	Yes	Yes	Yes	Yes	Yes
298	Male	21-30	Highier education (avobe bachelor)	Single	Non-govt. empolyee	Nuclear	<5	>30,000	Urban area	More accurate	Less Positive	More frequent	Yes	No	Yes	Yes	No	No	Agree	Agree	Agree	Agree	Disagree	Agree	Yes	Yes	Yes	Yes	No	Yes	Yes
299	Male	21-30	Bachelor	Single	Student	Nuclear	<5	>30,000	Rural area	More accurate	Less Positive	More frequent	Yes	Yes	Yes	Yes	No	No	Agree	Agree	Agree	Agree	Disagree	Agree	Yes	Yes	Yes	Yes	Yes	Yes	Yes
300	Male	21-30	Bachelor	Single	Student	Nuclear	<5	>30,000	Rural area	More accurate	Less Positive	More frequent	Yes	Yes	Yes	Yes	Don't know	No	Agree	Agree	Agree	Agree	Disagree	Agree	Yes	Yes	Yes	Yes	No	Yes	Yes
301	Male	12-20	Bachelor	Single	Student	Nuclear	≥5	>30,000	Rural area	More accurate	Less Positive	More frequent	Yes	Yes	Yes	Yes	No	No	Agree	Agree	Agree	Agree	Disagree	Agree	Yes	Yes	Yes	Yes	Yes	Yes	Yes
302	Male	21-30	Highier education (avobe bachelor)	Single	Student	Nuclear	<5	>30,000	Rural area	More accurate	Less Positive	More frequent	Yes	Yes	Yes	Yes	No	No	Agree	Agree	Agree	Agree	Agree	Disagree	Yes	Yes	Yes	Yes	No	Yes	Yes
303	Male	21-30	Bachelor	Single	Non-govt. empolyee	Nuclear	≥5	>30,000	Rural area	More accurate	Less Positive	More frequent	Yes	Yes	Yes	Yes	No	No	Agree	Agree	Agree	Disagree	Disagree	Agree	Yes	Yes	Yes	Yes	No	Yes	Yes
304	Male	12-20	Bachelor	Single	Student	Nuclear	<5	>30,000	Rural area	More accurate	Less Positive	More frequent	Yes	Yes	Yes	Yes	Yes	No	Agree	Agree	Agree	Agree	Disagree	Agree	Sometimes	Yes	Yes	Yes	Yes	Yes	Yes
305	Male	21-30	Bachelor	Single	Student	Nuclear	<5	>30,000	Rural area	More accurate	Less Positive	More frequent	Yes	Yes	Yes	Yes	No	No	Agree	Agree	Agree	Agree	Disagree	Agree	Yes	Yes	Yes	Yes	No	Yes	Yes
306	Male	21-30	Bachelor	Single	Student	Nuclear	<5	>30,000	Rural area	More accurate	Less Positive	More frequent	Yes	No	Yes	Yes	No	No	Agree	Agree	Agree	Agree	Disagree	Agree	Yes	Yes	Yes	Yes	No	Yes	Yes
307	Male	12-20	Bachelor	Single	Student	Nuclear	<5	>30,000	Urban area	More accurate	Less Positive	More frequent	Yes	No	Yes	Yes	Yes	No	Agree	Agree	Agree	Agree	Disagree	Agree	Yes	Yes	Yes	Yes	No	Yes	Yes
308	Male	12-20	Intermediate (11-12)	Single	Student	Nuclear	<5	>30,000	Rural area	More accurate	Less Positive	More frequent	Yes	Yes	Yes	Yes	Yes	No	Agree	Agree	Agree	Agree	Disagree	Agree	Yes	Yes	Yes	Yes	Yes	Yes	Yes
309	Male	12-20	Intermediate (11-12)	Single	Student	Nuclear	<5	>30,000	Rural area	More accurate	Less Positive	More frequent	Yes	Yes	Yes	Yes	Yes	No	Agree	Agree	Agree	Agree	Disagree	Agree	Yes	Yes	Yes	Yes	Yes	Yes	Yes
310	Male	21-30	Bachelor	Single	Student	Nuclear	<5	>30,000	Rural area	More accurate	Less Positive	More frequent	Yes	Yes	Yes	Yes	Don't know	No	Agree	Agree	Agree	Agree	Agree	Disagree	Yes	Yes	Sometimes	Yes	Yes	Yes	Yes
311	Male	12-20	Secondary (6-10)	Single	Student	Nuclear	<5	>30,000	Rural area	More accurate	Less Positive	More frequent	Yes	Yes	Yes	Yes	Yes	No	Agree	Agree	Agree	Agree	Disagree	Agree	Yes	Yes	Yes	Yes	No	Yes	Yes
312	Male	21-30	Bachelor	Single	Student	Nuclear	<5	>30,000	Rural area	More accurate	Less Positive	More frequent	Yes	Yes	Yes	Yes	No	No	Agree	Agree	Agree	Agree	Disagree	Agree	Yes	Yes	Yes	Yes	Yes	Yes	Yes
313	Male	12-20	Bachelor	Single	Student	Nuclear	≥5	>30,000	Urban area	More accurate	Less Positive	More frequent	Yes	Yes	Yes	Yes	Yes	No	Agree	Agree	Agree	Agree	Disagree	Agree	Yes	Yes	Yes	Yes	Yes	Yes	Yes
314	Male	12-20	Intermediate (11-12)	Single	Student	Nuclear	≥5	>30,000	Rural area	More accurate	Less Positive	More frequent	Yes	Yes	Yes	Yes	No	No	Agree	Agree	Agree	Agree	Disagree	Agree	Yes	Yes	Yes	Yes	No	Yes	Yes
315	Male	21-30	Highier education (avobe bachelor)	Single	Govt. employee	Nuclear	<5	>30,000	Rural area	More accurate	Less Positive	More frequent	Yes	No	Yes	Yes	Yes	No	Agree	Agree	Agree	Undecided	Disagree	Agree	Yes	Yes	Yes	Yes	No	Yes	Yes
316	Male	12-20	Bachelor	Single	Student	Nuclear	<5	>30,000	Rural area	More accurate	Less Positive	More frequent	Yes	No	Yes	Yes	Yes	No	Agree	Agree	Agree	Agree	Disagree	Agree	Yes	Yes	Yes	Yes	No	Yes	Yes
317	Male	12-20	Bachelor	Single	Student	Nuclear	≥5	>30,000	Urban area	More accurate	Less Positive	More frequent	Yes	No	Yes	Yes	Yes	No	Agree	Agree	Agree	Agree	Disagree	Agree	Yes	Yes	Yes	Yes	No	Yes	Yes
318	Male	12-20	Secondary (6-10)	Single	Student	Nuclear	<5	>30,000	Rural area	More accurate	Less Positive	More frequent	Yes	No	Yes	Yes	No	No	Agree	Agree	Agree	Agree	Agree	Disagree	Yes	Yes	Yes	Yes	No	Yes	Yes
319	Male	>30	Highier education (avobe bachelor)	Single	Businessman	Nuclear	<5	>30,000	Urban area	More accurate	Less Positive	More frequent	Yes	Yes	Yes	Yes	Yes	No	Agree	Agree	Agree	Undecided	Disagree	Agree	Yes	Yes	Yes	Yes	No	Yes	Yes
320	Male	21-30	Bachelor	Single	Student	Nuclear	<5	>30,000	Urban area	More accurate	Less Positive	More frequent	Yes	No	Yes	Yes	Don't know	No	Agree	Agree	Agree	Agree	Disagree	Agree	Yes	Yes	Yes	Yes	No	Yes	Yes
321	Male	21-30	Intermediate (11-12)	Single	Student	Nuclear	<5	>30,000	Urban area	More accurate	Less Positive	More frequent	Yes	No	Yes	Yes	No	No	Agree	Agree	Agree	Agree	Disagree	Agree	Yes	Yes	Sometimes	Yes	Yes	Yes	Yes
322	Female	21-30	Bachelor	Single	Student	Nuclear	≥5	>30,000	Urban area	More accurate	Less Positive	More frequent	Yes	No	Yes	Yes	Don't know	No	Agree	Agree	Agree	Agree	Disagree	Agree	Yes	Yes	Yes	Yes	No	Yes	Yes
323	Female	12-20	Bachelor	Single	Student	Nuclear	<5	>30,000	Rural area	More accurate	Less Positive	More frequent	Yes	Yes	Yes	Yes	No	No	Agree	Agree	Agree	Agree	Disagree	Agree	Yes	Yes	Yes	Yes	No	Yes	Yes
324	Female	21-30	Bachelor	Single	Student	Nuclear	<5	>30,000	Rural area	More accurate	Less Positive	More frequent	Yes	Yes	Yes	Yes	No	No	Agree	Agree	Agree	Agree	Disagree	Agree	Yes	Yes	Yes	Yes	No	Yes	Yes
325	Female	12-20	Bachelor	Single	Student	Nuclear	<5	>30,000	Rural area	More accurate	Less Positive	More frequent	Yes	Yes	Yes	Yes	Yes	No	Agree	Agree	Agree	Agree	Disagree	Agree	Yes	Yes	Yes	Yes	No	Yes	Yes
326	Female	12-20	Bachelor	Single	Student	Nuclear	≥5	>30,000	Rural area	More accurate	Less Positive	More frequent	Yes	No	Yes	Yes	Don't know	No	Agree	Agree	Agree	Undecided	Undecided	Agree	Yes	Yes	Yes	Yes	No	Yes	Yes
327	Female	21-30	Bachelor	Single	Student	Nuclear	<5	>30,000	Rural area	More accurate	Less Positive	More frequent	Yes	Yes	Yes	Yes	Yes	No	Agree	Agree	Agree	Agree	Disagree	Agree	Yes	Yes	Yes	Yes	No	Yes	Yes
328	Female	12-20	Bachelor	Single	Student	Nuclear	<5	>30,000	Rural area	More accurate	Less Positive	More frequent	Yes	Yes	Yes	Yes	Yes	No	Agree	Agree	Agree	Agree	Disagree	Agree	Yes	Yes	Yes	Yes	No	Yes	Yes
329	Female	12-20	Bachelor	Single	Student	Nuclear	<5	>30,000	Rural area	More accurate	Less Positive	More frequent	Yes	No	Yes	Yes	Yes	No	Agree	Agree	Agree	Agree	Disagree	Agree	Yes	Yes	Yes	Yes	No	Yes	Yes
330	Female	21-30	Bachelor	Single	Student	Nuclear	<5	>30,000	Rural area	More accurate	Less Positive	More frequent	Yes	Yes	Yes	Yes	Yes	No	Agree	Agree	Agree	Agree	Disagree	Agree	Yes	Yes	Yes	Yes	No	Yes	Yes
331	Female	21-30	Highier education (avobe bachelor)	Single	Non-govt. empolyee	Nuclear	<5	>30,000	Rural area	More accurate	Less Positive	More frequent	Yes	No	Yes	Yes	Yes	No	Agree	Agree	Agree	Agree	Disagree	Agree	Yes	Yes	Yes	Yes	No	Yes	Yes
332	Female	12-20	Bachelor	Single	Student	Nuclear	<5	>30,000	Rural area	More accurate	Less Positive	More frequent	Yes	Yes	Yes	Yes	No	No	Agree	Agree	Agree	Agree	Agree	Disagree	Yes	Yes	Yes	Yes	No	Yes	Yes
333	Female	12-20	Bachelor	Single	Student	Nuclear	<5	>30,000	Rural area	More accurate	Less Positive	More frequent	Yes	Yes	Yes	Yes	No	No	Agree	Agree	Agree	Agree	Disagree	Agree	Yes	Yes	Yes	Yes	No	Yes	Yes
334	Female	12-20	Bachelor	Single	Student	Nuclear	<5	>30,000	Rural area	More accurate	Less Positive	More frequent	Yes	Yes	Yes	Yes	No	No	Agree	Agree	Agree	Agree	Disagree	Agree	Yes	Yes	Yes	Yes	Yes	Yes	Yes
335	Female	12-20	Bachelor	Single	Student	Nuclear	<5	>30,000	Rural area	More accurate	Less Positive	More frequent	Yes	Yes	Yes	Yes	No	No	Agree	Agree	Agree	Undecided	Undecided	Undecided	Yes	Yes	Yes	Yes	No	Yes	Yes
336	Female	12-20	Bachelor	Single	Student	Nuclear	<5	>30,000	Rural area	More accurate	Less Positive	More frequent	Yes	Yes	Yes	Yes	Don't know	No	Agree	Agree	Agree	Undecided	Undecided	Agree	Yes	Yes	Yes	Yes	No	Yes	Yes
337	Female	12-20	Bachelor	Single	Student	Nuclear	<5	>30,000	Rural area	More accurate	Less Positive	More frequent	Yes	Yes	Yes	Yes	Yes	No	Agree	Agree	Agree	Agree	Disagree	Agree	Yes	Yes	Yes	Yes	Yes	Yes	Yes
338	Female	21-30	Bachelor	Single	Student	Nuclear	<5	>30,000	Rural area	More accurate	Less Positive	More frequent	Yes	No	Yes	Yes	Don't know	No	Agree	Agree	Agree	Agree	Disagree	Agree	Yes	Yes	Yes	Yes	No	Yes	Yes
339	Female	21-30	Bachelor	Single	Student	Nuclear	<5	>30,000	Rural area	More accurate	Less Positive	More frequent	Yes	Yes	Yes	Yes	Yes	No	Agree	Agree	Agree	Agree	Disagree	Agree	Yes	Yes	Yes	Yes	No	Yes	Yes
340	Female	21-30	Bachelor	Single	Student	Nuclear	<5	>30,000	Rural area	More accurate	Less Positive	More frequent	Yes	No	Yes	Yes	Yes	No	Agree	Agree	Agree	Agree	Disagree	Agree	Yes	Yes	Yes	Yes	Yes	Yes	Yes
341	Female	12-20	Intermediate (11-12)	Single	Student	Nuclear	<5	>30,000	Rural area	More accurate	Less Positive	More frequent	Yes	No	Yes	Yes	No	No	Agree	Agree	Agree	Agree	Disagree	Agree	Yes	Yes	Yes	Yes	No	Yes	Yes
342	Female	12-20	Intermediate (11-12)	Single	Student	Nuclear	<5	>30,000	Rural area	More accurate	Less Positive	More frequent	Yes	Yes	Yes	Yes	Don't know	No	Agree	Agree	Agree	Agree	Disagree	Agree	Yes	Yes	Sometimes	Yes	Yes	Yes	Yes
343	Female	21-30	Bachelor	Single	Student	Nuclear	≥5	>30,000	Urban area	More accurate	Less Positive	More frequent	Yes	No	Yes	Yes	Yes	No	Agree	Agree	Agree	Agree	Disagree	Agree	Yes	Yes	Yes	Yes	No	Yes	Yes
344	Female	12-20	Bachelor	Single	Student	Nuclear	<5	>30,000	Rural area	More accurate	Less Positive	More frequent	Yes	Yes	Yes	Yes	No	No	Agree	Agree	Agree	Agree	Disagree	Agree	Yes	Yes	Yes	Yes	No	Yes	Yes
345	Female	21-30	Bachelor	Single	Student	Nuclear	<5	>30,000	Urban area	Less accurate	Less Positive	More frequent	Yes	Yes	Yes	Yes	Don't know	Don't know	Agree	Agree	Agree	Agree	Disagree	Agree	Yes	Yes	Yes	Yes	No	Yes	Yes
346	Female	12-20	Bachelor	Single	Student	Nuclear	<5	>30,000	Urban area	More accurate	Less Positive	More frequent	Yes	No	Yes	Yes	No	No	Agree	Agree	Agree	Agree	Disagree	Agree	Yes	Yes	Yes	Yes	No	Yes	Yes
347	Female	12-20	Intermediate (11-12)	Single	Student	Nuclear	<5	>30,000	Rural area	More accurate	Less Positive	More frequent	Yes	Yes	Yes	Yes	Don't know	No	Undecided	Agree	Agree	Agree	Disagree	Agree	Sometimes	Yes	Yes	Yes	Yes	Yes	Yes
348	Female	12-20	Intermediate (11-12)	Single	Student	Nuclear	<5	>30,000	Rural area	More accurate	Less Positive	More frequent	Yes	Don't know	Yes	Yes	Don't know	No	Agree	Agree	Agree	Agree	Disagree	Agree	Yes	Yes	Yes	Yes	No	Yes	Yes
349	Female	12-20	Bachelor	Single	Student	Nuclear	<5	>30,000	Rural area	More accurate	Less Positive	More frequent	Yes	No	Yes	Yes	Don't know	No	Agree	Agree	Agree	Undecided	Disagree	Agree	Yes	Yes	Yes	Yes	No	Yes	Yes
350	Female	12-20	Bachelor	Single	Student	Nuclear	<5	>30,000	Rural area	More accurate	Less Positive	More frequent	Yes	Yes	Yes	Yes	No	No	Agree	Agree	Agree	Agree	Disagree	Agree	Yes	Yes	Yes	Yes	Yes	Yes	Yes
351	Female	21-30	Highier education (avobe bachelor)	Single	Student	Nuclear	<5	>30,000	Rural area	More accurate	Less Positive	More frequent	Yes	Yes	Yes	Yes	Yes	No	Agree	Agree	Agree	Agree	Agree	Disagree	Yes	Yes	Yes	Yes	Yes	Yes	Yes
352	Female	21-30	Highier education (avobe bachelor)	Single	Non-govt. empolyee	Nuclear	<5	>30,000	Rural area	More accurate	Less Positive	More frequent	Yes	No	Yes	Yes	No	No	Agree	Agree	Agree	Agree	Disagree	Agree	Yes	Yes	Sometimes	Yes	Yes	Yes	Yes
353	Female	>30	Highier education (avobe bachelor)	Single	Non-govt. empolyee	Nuclear	≥5	>30,000	Rural area	More accurate	Less Positive	More frequent	Yes	No	Yes	Yes	Yes	No	Agree	Agree	Agree	Disagree	Agree	Agree	Yes	Yes	Yes	Yes	Yes	Yes	Yes
354	Male	>30	Highier education (avobe bachelor)	Married	Govt. employee	Nuclear	<5	>30,000	Rural area	More accurate	Less Positive	More frequent	Yes	Yes	Yes	Yes	Yes	No	Agree	Agree	Agree	Agree	Disagree	Agree	Yes	Yes	Yes	Yes	No	Yes	Yes
355	Male	21-30	Highier education (avobe bachelor)	Married	Student	Nuclear	≥5	>30,000	Urban area	More accurate	Less Positive	More frequent	Yes	Yes	Yes	Yes	No	No	Agree	Agree	Agree	Agree	Disagree	Agree	Yes	Yes	Yes	Yes	Yes	Yes	Yes
356	Male	>30	Highier education (avobe bachelor)	Married	Non-govt. empolyee	Nuclear	<5	>30,000	Rural area	More accurate	Less Positive	More frequent	Yes	Yes	Yes	Yes	Yes	No	Agree	Disagree	Agree	Agree	Agree	Agree	Yes	Yes	Yes	Yes	No	Yes	Yes
357	Male	>30	Highier education (avobe bachelor)	Married	Non-govt. empolyee	Nuclear	<5	>30,000	Rural area	More accurate	Less Positive	More frequent	Yes	Yes	Yes	Yes	Yes	No	Agree	Disagree	Agree	Agree	Agree	Agree	Yes	Yes	Yes	Yes	No	Yes	Yes
358	Male	>30	Highier education (avobe bachelor)	Married	Non-govt. empolyee	Nuclear	<5	>30,000	Rural area	More accurate	Less Positive	More frequent	Yes	Yes	Yes	Yes	No	No	Agree	Agree	Agree	Agree	Disagree	Agree	Yes	Yes	Yes	Yes	No	Yes	Yes
359	Male	>30	Bachelor	Married	Non-govt. empolyee	Nuclear	<5	>30,000	Rural area	More accurate	Less Positive	More frequent	Yes	Yes	Yes	Yes	Don't know	No	Agree	Agree	Agree	Disagree	Disagree	Agree	Yes	Yes	Yes	Yes	Yes	Yes	Yes
360	Male	21-30	Highier education (avobe bachelor)	Married	Non-govt. empolyee	Nuclear	<5	>30,000	Urban area	More accurate	Less Positive	More frequent	Yes	No	Yes	Yes	Yes	No	Agree	Agree	Agree	Agree	Agree	Disagree	Yes	Yes	Yes	Yes	Yes	Yes	No
361	Male	21-30	Highier education (avobe bachelor)	Married	Govt. employee	Nuclear	<5	>30,000	Rural area	More accurate	Less Positive	More frequent	Yes	No	Yes	Yes	No	No	Agree	Agree	Agree	Agree	Disagree	Agree	Yes	Yes	Yes	Yes	No	Yes	Yes
362	Male	21-30	Highier education (avobe bachelor)	Married	Govt. employee	Nuclear	<5	>30,000	Rural area	More accurate	Less Positive	More frequent	Yes	No	Yes	Yes	Don't know	No	Agree	Agree	Agree	Disagree	Disagree	Agree	Yes	Yes	Yes	Yes	No	Yes	Yes
363	Male	21-30	Highier education (avobe bachelor)	Married	Non-govt. empolyee	Nuclear	<5	>30,000	Rural area	More accurate	Less Positive	More frequent	Yes	No	Yes	Yes	Don't know	No	Agree	Agree	Agree	Agree	Disagree	Agree	Yes	Yes	Yes	Yes	No	Yes	Yes
364	Female	21-30	Bachelor	Married	Housewife	Nuclear	<5	>30,000	Rural area	More accurate	Less Positive	More frequent	Yes	Yes	Yes	Yes	Yes	No	Agree	Agree	Agree	Agree	Disagree	Agree	Yes	Yes	Yes	Yes	Yes	Yes	Yes
365	Female	21-30	Highier education (avobe bachelor)	Married	Housewife	Nuclear	<5	>30,000	Rural area	More accurate	Less Positive	More frequent	Yes	Yes	Yes	Yes	No	No	Agree	Agree	Agree	Agree	Disagree	Agree	Yes	Yes	Yes	Yes	Yes	Yes	Yes
366	Female	21-30	Highier education (avobe bachelor)	Married	Govt. employee	Nuclear	<5	>30,000	Rural area	More accurate	Less Positive	More frequent	Yes	Yes	Yes	Yes	No	No	Agree	Agree	Agree	Agree	Disagree	Agree	Yes	Yes	Yes	Yes	No	Yes	Yes
367	Female	21-30	Highier education (avobe bachelor)	Married	Govt. employee	Nuclear	≥5	>30,000	Rural area	More accurate	Less Positive	More frequent	Yes	No	Yes	Yes	Yes	No	Agree	Agree	Agree	Agree	Disagree	Agree	Yes	Yes	Yes	Yes	No	Yes	Yes
368	Female	21-30	Highier education (avobe bachelor)	Married	Housewife	Nuclear	<5	>30,000	Rural area	More accurate	Less Positive	More frequent	Yes	No	Yes	Yes	Yes	No	Agree	Agree	Agree	Agree	Disagree	Agree	Yes	Yes	Yes	Yes	Yes	Yes	Yes
369	Female	>30	Highier education (avobe bachelor)	Married	Non-govt. empolyee	Nuclear	<5	>30,000	Rural area	More accurate	Less Positive	More frequent	Yes	No	Yes	Yes	Yes	No	Agree	Agree	Agree	Agree	Disagree	Agree	Yes	Yes	Yes	Yes	No	Yes	Yes
370	Male	21-30	Highier education (avobe bachelor)	Single	Student	Join	≥5	>30,000	Rural area	More accurate	Less Positive	More frequent	Yes	Yes	Yes	Yes	No	No	Agree	Agree	Agree	Agree	Agree	Disagree	Yes	Yes	Yes	Yes	Yes	Yes	Yes
371	Male	21-30	Highier education (avobe bachelor)	Single	Govt. employee	Join	≥5	>30,000	Urban area	More accurate	Less Positive	More frequent	Yes	Yes	Yes	Yes	No	No	Agree	Agree	Agree	Agree	Disagree	Agree	Yes	Yes	Yes	Yes	Yes	Yes	Yes
372	Male	21-30	Bachelor	Single	Student	Join	≥5	>30,000	Urban area	More accurate	Less Positive	More frequent	Yes	No	Yes	Yes	No	No	Agree	Agree	Agree	Agree	Disagree	Agree	Yes	Yes	Yes	Yes	No	Yes	Yes
373	Male	21-30	Bachelor	Single	Student	Join	<5	>30,000	Rural area	More accurate	Less Positive	More frequent	Yes	Yes	Yes	Yes	No	No	Agree	Agree	Agree	Agree	Disagree	Agree	Yes	Yes	Yes	Yes	Yes	Yes	Yes
374	Female	21-30	Bachelor	Single	Student	Join	≥5	>30,000	Rural area	More accurate	Less Positive	More frequent	Yes	Yes	Yes	Yes	No	No	Agree	Agree	Agree	Disagree	Agree	Agree	Yes	Yes	Sometimes	Yes	Yes	Yes	Yes
375	Female	12-20	Bachelor	Single	Student	Join	<5	>30,000	Rural area	More accurate	Less Positive	More frequent	Yes	Yes	Yes	Yes	Yes	No	Agree	Agree	Agree	Agree	Disagree	Agree	Yes	Yes	Sometimes	Yes	Yes	Yes	Yes
376	Female	12-20	Intermediate (11-12)	Single	Student	Join	≥5	>30,000	Rural area	More accurate	Less Positive	More frequent	Yes	Yes	Yes	Yes	Yes	No	Agree	Agree	Agree	Agree	Disagree	Agree	Yes	Yes	Yes	Yes	No	Yes	Yes
377	Female	>30	Highier education (avobe bachelor)	Single	Non-govt. empolyee	Join	≥5	>30,000	Rural area	More accurate	Less Positive	More frequent	Yes	Yes	Yes	Yes	No	No	Agree	Agree	Agree	Agree	Disagree	Agree	Yes	Yes	Yes	Yes	Yes	Yes	Yes
378	Female	12-20	Bachelor	Single	Student	Join	<5	>30,000	Rural area	More accurate	Less Positive	More frequent	Yes	Yes	Yes	Yes	Don't know	No	Agree	Agree	Agree	Undecided	Undecided	Agree	Yes	Yes	Sometimes	Yes	Yes	Yes	Yes
379	Female	21-30	Highier education (avobe bachelor)	Single	Businessman	Join	≥5	>30,000	Rural area	More accurate	Less Positive	More frequent	Yes	Yes	Yes	Yes	No	No	Agree	Agree	Agree	Agree	Agree	Disagree	Yes	Yes	Sometimes	Yes	Yes	Yes	Yes
380	Male	>30	Bachelor	Married	Non-govt. empolyee	Join	≥5	>30,000	Rural area	More accurate	Less Positive	More frequent	Yes	Yes	Yes	Yes	No	No	Agree	Agree	Agree	Undecided	Disagree	Agree	Yes	Yes	Yes	Yes	Yes	Yes	Yes
381	Male	21-30	Highier education (avobe bachelor)	Married	Non-govt. empolyee	Join	≥5	>30,000	Rural area	More accurate	Less Positive	More frequent	Yes	No	Yes	Yes	Yes	No	Agree	Agree	Agree	Agree	Disagree	Agree	Yes	Yes	Yes	Yes	No	Yes	Yes
382	Male	>30	Highier education (avobe bachelor)	Married	Businessman	Join	≥5	>30,000	Rural area	More accurate	Less Positive	More frequent	Yes	Yes	Yes	Yes	No	No	Agree	Agree	Agree	Agree	Disagree	Agree	Yes	Yes	Yes	Yes	No	Yes	Yes
383	Male	21-30	Bachelor	Married	Businessman	Join	<5	>30,000	Rural area	More accurate	Less Positive	More frequent	Yes	Yes	Yes	Yes	No	No	Agree	Agree	Agree	Agree	Disagree	Agree	Yes	Yes	Sometimes	Yes	Yes	Yes	Yes
384	Male	>30	Highier education (avobe bachelor)	Married	Non-govt. empolyee	Join	≥5	>30,000	Rural area	More accurate	Less Positive	More frequent	Yes	No	Yes	Yes	No	No	Agree	Disagree	Agree	Agree	Agree	Agree	Yes	Yes	Yes	Yes	Yes	Yes	Yes
385	Male	21-30	Highier education (avobe bachelor)	Married	Student	Join	≥5	>30,000	Rural area	More accurate	Less Positive	More frequent	Yes	Yes	Yes	Yes	Don't know	No	Agree	Agree	Agree	Agree	Undecided	Disagree	Yes	Yes	Yes	Yes	No	Yes	Yes
386	Male	12-20	Bachelor	Single	Student	Nuclear	<5	<20,000	Urban area	More accurate	More Positive	Less frequent	Yes	No	Yes	Yes	Yes	No	Agree	Agree	Agree	Agree	Agree	Agree	Yes	Yes	Sometimes	Sometimes	Yes	Sometimes	No
387	Male	12-20	Bachelor	Single	Student	Nuclear	<5	<20,000	Rural area	More accurate	More Positive	Less frequent	Yes	Yes	Yes	Yes	No	No	Agree	Agree	Agree	Agree	Agree	Agree	Yes	Yes	Sometimes	Sometimes	No	Sometimes	Yes
388	Male	21-30	Bachelor	Single	Student	Nuclear	≥5	<20,000	Urban area	More accurate	More Positive	Less frequent	Yes	Don't know	Yes	Yes	Yes	No	Agree	Agree	Agree	Agree	Agree	Agree	Yes	Yes	Sometimes	Sometimes	Yes	Yes	Yes
389	Male	21-30	Intermediate (11-12)	Single	Non-govt. empolyee	Nuclear	<5	<20,000	Rural area	More accurate	More Positive	Less frequent	Yes	Don't know	Yes	Yes	Don't know	No	Agree	Agree	Agree	Agree	Undecided	Agree	Yes	Yes	Sometimes	Yes	No	Yes	Yes
390	Male	21-30	Intermediate (11-12)	Single	Student	Nuclear	≥5	<20,000	Rural area	More accurate	More Positive	Less frequent	Yes	Yes	Yes	Yes	No	No	Agree	Agree	Agree	Agree	Agree	Agree	Yes	Yes	Sometimes	Yes	No	Yes	Yes
391	Male	21-30	Bachelor	Single	Student	Nuclear	<5	<20,000	Urban area	More accurate	More Positive	Less frequent	Yes	Yes	Yes	Yes	No	No	Agree	Agree	Agree	Agree	Agree	Agree	Sometimes	Yes	No	Yes	No	Yes	Yes
392	Male	21-30	Bachelor	Single	Student	Nuclear	≥5	<20,000	Urban area	More accurate	More Positive	Less frequent	Yes	No	Yes	Yes	Don't know	No	Agree	Agree	Agree	Agree	Undecided	Agree	Yes	Yes	Sometimes	Sometimes	No	Sometimes	Sometimes
393	Male	21-30	Bachelor	Single	Student	Nuclear	<5	<20,000	Urban area	More accurate	More Positive	Less frequent	Yes	Yes	Yes	Yes	Yes	No	Agree	Agree	Agree	Agree	Agree	Agree	Sometimes	Yes	Yes	Yes	No	Yes	Yes
394	Male	21-30	Bachelor	Single	Student	Nuclear	<5	<20,000	Urban area	More accurate	More Positive	Less frequent	Yes	Yes	Yes	Yes	No	No	Agree	Agree	Agree	Agree	Agree	Agree	No	Yes	No	Yes	Yes	Yes	Yes
395	Male	12-20	Bachelor	Single	Student	Nuclear	<5	<20,000	Urban area	More accurate	More Positive	Less frequent	Yes	No	Yes	Yes	Yes	No	Agree	Agree	Agree	Agree	Agree	Agree	Sometimes	Yes	Sometimes	Yes	No	Yes	Yes
396	Male	21-30	Highier education (avobe bachelor)	Single	Student	Nuclear	<5	<20,000	Urban area	More accurate	More Positive	Less frequent	Yes	Yes	Yes	Yes	Yes	No	Agree	Agree	Agree	Agree	Agree	Agree	Sometimes	Yes	Sometimes	Yes	Yes	Yes	Yes
397	Male	21-30	Bachelor	Single	Student	Nuclear	<5	<20,000	Urban area	Less accurate	More Positive	Less frequent	Yes	Don't know	Yes	Yes	Don't know	Don't know	Agree	Agree	Agree	Agree	Agree	Agree	Sometimes	Yes	Sometimes	Sometimes	No	Sometimes	Yes
398	Male	21-30	Bachelor	Single	Student	Nuclear	<5	<20,000	Urban area	More accurate	More Positive	Less frequent	Yes	No	Yes	Yes	No	No	Agree	Agree	Agree	Agree	Agree	Agree	Yes	Yes	Sometimes	Sometimes	No	Yes	Sometimes
399	Male	21-30	Bachelor	Single	Student	Nuclear	<5	<20,000	Urban area	More accurate	More Positive	Less frequent	Yes	No	Yes	Yes	No	No	Agree	Agree	Agree	Agree	Agree	Agree	Sometimes	Yes	Yes	Yes	No	Yes	Yes
400	Male	21-30	Bachelor	Single	Student	Nuclear	<5	<20,000	Rural area	More accurate	More Positive	Less frequent	Yes	No	Yes	Yes	Don't know	No	Agree	Agree	Agree	Agree	Undecided	Agree	Sometimes	Yes	Sometimes	Yes	No	Yes	Yes
401	Male	21-30	Bachelor	Single	Student	Nuclear	<5	<20,000	Urban area	More accurate	More Positive	Less frequent	Yes	No	Yes	Yes	No	No	Agree	Agree	Agree	Agree	Agree	Agree	Yes	Yes	Yes	Sometimes	No	Yes	Yes
402	Male	12-20	Intermediate (11-12)	Single	Student	Nuclear	<5	<20,000	Urban area	More accurate	More Positive	Less frequent	Yes	No	Yes	Yes	Don't know	No	Agree	Agree	Agree	Agree	Undecided	Agree	Sometimes	Yes	Sometimes	Yes	No	Yes	Yes
403	Male	21-30	Highier education (avobe bachelor)	Single	Student	Nuclear	<5	<20,000	Rural area	More accurate	More Positive	Less frequent	Yes	Don't know	Yes	Yes	Don't know	No	Agree	Agree	Agree	Agree	Undecided	Agree	Sometimes	Yes	Sometimes	Yes	Yes	Sometimes	Yes
404	Male	21-30	Highier education (avobe bachelor)	Single	Student	Nuclear	<5	<20,000	Urban area	More accurate	More Positive	Less frequent	Yes	No	Yes	Yes	Yes	No	Agree	Agree	Agree	Agree	Agree	Agree	Sometimes	Yes	No	Yes	Yes	Yes	Yes
405	Male	12-20	Bachelor	Single	Student	Nuclear	<5	<20,000	Urban area	More accurate	More Positive	Less frequent	Yes	No	Yes	Yes	Don't know	No	Agree	Agree	Agree	Agree	Undecided	Agree	Sometimes	Yes	Sometimes	Yes	No	Yes	Sometimes
406	Male	21-30	Bachelor	Single	Student	Nuclear	<5	<20,000	Rural area	More accurate	More Positive	Less frequent	Yes	Yes	Yes	Yes	Don't know	No	Agree	Agree	Agree	Agree	Undecided	Agree	Yes	Yes	Yes	Sometimes	No	Yes	Yes
407	Male	12-20	Intermediate (11-12)	Single	Student	Nuclear	<5	<20,000	Urban area	Less accurate	More Positive	Less frequent	Yes	Don't know	Yes	Yes	Don't know	Don't know	Agree	Agree	Agree	Agree	Agree	Agree	Sometimes	Yes	Sometimes	Yes	No	Yes	Yes
408	Male	21-30	Bachelor	Single	Student	Nuclear	<5	<20,000	Rural area	More accurate	More Positive	Less frequent	Yes	No	Yes	Yes	Don't know	Don't know	Agree	Agree	Agree	Agree	Agree	Agree	Sometimes	Yes	Sometimes	Yes	No	Yes	Yes
409	Male	21-30	Highier education (avobe bachelor)	Single	Student	Nuclear	<5	<20,000	Rural area	Less accurate	More Positive	Less frequent	Yes	Don't know	Yes	Yes	Don't know	Don't know	Agree	Agree	Agree	Agree	Agree	Undecided	Yes	Yes	Sometimes	Yes	No	Yes	Yes
410	Male	21-30	Bachelor	Single	Student	Nuclear	<5	<20,000	Urban area	More accurate	More Positive	Less frequent	Yes	Yes	Yes	Yes	No	No	Agree	Agree	Agree	Agree	Agree	Agree	Sometimes	Yes	Sometimes	Yes	No	Yes	Yes
411	Male	12-20	Bachelor	Single	Student	Nuclear	<5	<20,000	Rural area	More accurate	More Positive	Less frequent	Yes	No	Yes	Yes	Don't know	No	Agree	Agree	Agree	Agree	Agree	Undecided	Sometimes	Yes	Sometimes	Yes	Yes	Yes	Yes
412	Male	12-20	Bachelor	Single	Student	Nuclear	<5	<20,000	Rural area	More accurate	More Positive	Less frequent	Yes	No	Yes	Yes	No	No	Agree	Agree	Agree	Agree	Agree	Agree	Yes	Yes	Yes	Yes	No	Sometimes	Yes
413	Male	21-30	Bachelor	Single	Non-govt. empolyee	Nuclear	<5	<20,000	Urban area	More accurate	More Positive	Less frequent	Yes	No	Yes	Yes	Yes	No	Agree	Agree	Agree	Agree	Agree	Agree	Sometimes	Yes	Yes	Yes	No	Yes	Yes
414	Female	21-30	Intermediate (11-12)	Single	Student	Nuclear	≥5	<20,000	Urban area	More accurate	More Positive	Less frequent	Yes	Yes	Yes	Yes	Yes	No	Agree	Agree	Agree	Agree	Agree	Agree	Sometimes	Yes	Yes	Yes	No	Yes	Yes
415	Female	21-30	Intermediate (11-12)	Single	Student	Nuclear	≥5	<20,000	Urban area	More accurate	More Positive	Less frequent	Yes	Yes	Yes	Yes	Yes	No	Agree	Agree	Agree	Agree	Agree	Agree	Sometimes	Yes	Yes	Yes	No	Yes	Yes
416	Female	21-30	Bachelor	Single	Student	Nuclear	<5	<20,000	Rural area	More accurate	More Positive	Less frequent	Yes	No	Yes	Yes	Yes	No	Agree	Agree	Agree	Agree	Agree	Agree	Sometimes	Yes	No	Yes	No	Sometimes	Yes
417	Female	12-20	Bachelor	Single	Student	Nuclear	≥5	<20,000	Urban area	More accurate	More Positive	Less frequent	Yes	No	Yes	Yes	Yes	No	Agree	Agree	Agree	Agree	Agree	Agree	Sometimes	Yes	No	Yes	Yes	Yes	Yes
418	Female	21-30	Bachelor	Single	Student	Nuclear	<5	<20,000	Urban area	More accurate	More Positive	Less frequent	Yes	Don't know	Yes	Yes	No	No	Agree	Agree	Agree	Agree	Agree	Agree	Sometimes	Yes	Sometimes	Yes	No	Sometimes	Sometimes
419	Female	21-30	Bachelor	Single	Student	Nuclear	≥5	<20,000	Rural area	More accurate	More Positive	Less frequent	Yes	Yes	Yes	Yes	Don't know	No	Agree	Agree	Agree	Undecided	Agree	Agree	Yes	Yes	Sometimes	Yes	Yes	Yes	Sometimes
420	Female	21-30	Bachelor	Single	Student	Nuclear	<5	<20,000	Urban area	More accurate	More Positive	Less frequent	Yes	Yes	Yes	Yes	Don't know	No	Agree	Agree	Agree	Agree	Agree	Agree	Sometimes	Yes	Yes	Yes	No	Yes	Yes
421	Female	21-30	Bachelor	Single	Student	Nuclear	≥5	<20,000	Rural area	More accurate	More Positive	Less frequent	Yes	No	Yes	Yes	Yes	No	Agree	Agree	Agree	Agree	Agree	Agree	Sometimes	Yes	No	Yes	Yes	Yes	Sometimes
422	Female	12-20	Bachelor	Single	Student	Nuclear	<5	<20,000	Urban area	More accurate	More Positive	Less frequent	Yes	Yes	Yes	Yes	No	No	Agree	Agree	Agree	Agree	Undecided	Agree	Sometimes	Yes	Sometimes	Sometimes	No	Sometimes	Sometimes
423	Female	21-30	Bachelor	Single	Student	Nuclear	<5	<20,000	Rural area	More accurate	More Positive	Less frequent	Yes	Yes	Yes	Yes	No	No	Agree	Agree	Agree	Agree	Agree	Agree	Yes	Yes	Yes	Yes	No	Yes	Sometimes
424	Female	12-20	Bachelor	Single	Student	Nuclear	<5	<20,000	Rural area	More accurate	More Positive	Less frequent	Yes	No	Yes	Yes	No	No	Agree	Agree	Agree	Agree	Agree	Agree	Yes	Yes	Sometimes	Yes	No	Yes	Yes
425	Female	21-30	Highier education (avobe bachelor)	Single	Student	Nuclear	<5	<20,000	Rural area	More accurate	More Positive	Less frequent	Yes	No	Yes	Yes	No	No	Agree	Agree	Agree	Agree	Agree	Agree	Yes	Yes	Sometimes	Yes	No	Yes	Yes
426	Female	12-20	Bachelor	Single	Student	Nuclear	<5	<20,000	Urban area	More accurate	More Positive	Less frequent	Yes	No	Yes	Yes	Yes	No	Agree	Agree	Agree	Agree	Agree	Agree	Yes	Yes	No	Yes	No	Sometimes	Yes
427	Female	12-20	Bachelor	Single	Student	Nuclear	<5	<20,000	Rural area	More accurate	More Positive	Less frequent	Yes	No	Yes	Yes	Yes	No	Agree	Agree	Agree	Agree	Agree	Agree	Yes	Yes	Sometimes	Yes	No	Yes	Yes
428	Female	21-30	Bachelor	Single	Student	Nuclear	≥5	<20,000	Rural area	More accurate	More Positive	Less frequent	Yes	No	Yes	Yes	No	No	Agree	Agree	Agree	Agree	Agree	Agree	Yes	Yes	Sometimes	Yes	No	Yes	Yes
429	Male	21-30	Bachelor	Married	Student	Nuclear	≥5	<20,000	Urban area	More accurate	More Positive	Less frequent	Yes	No	Yes	Yes	No	No	Agree	Agree	Agree	Agree	Agree	Agree	Sometimes	Yes	Sometimes	Yes	No	Sometimes	Yes
430	Male	21-30	Bachelor	Married	Non-govt. empolyee	Nuclear	<5	<20,000	Rural area	More accurate	More Positive	Less frequent	Yes	No	Yes	Yes	No	No	Agree	Agree	Agree	Agree	Agree	Agree	Yes	Yes	Sometimes	Yes	No	Yes	Yes
431	Female	21-30	Bachelor	Married	Student	Nuclear	<5	<20,000	Rural area	More accurate	More Positive	Less frequent	Yes	No	Yes	Yes	No	No	Agree	Agree	Agree	Agree	Agree	Agree	Yes	Yes	No	Yes	No	Yes	Yes
432	Female	21-30	Bachelor	Married	Student	Nuclear	<5	<20,000	Urban area	More accurate	More Positive	Less frequent	Yes	Yes	Yes	Yes	No	No	Agree	Agree	Agree	Agree	Agree	Agree	Sometimes	Yes	Sometimes	Yes	No	Yes	Sometimes
433	Female	21-30	Bachelor	Married	Unemployment	Nuclear	<5	<20,000	Rural area	More accurate	More Positive	Less frequent	No	No	Yes	Yes	No	No	Agree	Agree	Agree	Agree	Undecided	Agree	Sometimes	Yes	No	Yes	Yes	Yes	Yes
434	Male	12-20	Bachelor	Single	Student	Join	≥5	<20,000	Urban area	More accurate	More Positive	Less frequent	Yes	Yes	Yes	Yes	Yes	No	Agree	Agree	Agree	Agree	Undecided	Agree	Yes	Yes	Sometimes	Yes	No	Yes	Yes
435	Male	12-20	Bachelor	Single	Student	Join	≥5	<20,000	Urban area	More accurate	More Positive	Less frequent	Yes	No	Yes	Yes	No	No	Agree	Agree	Agree	Agree	Agree	Agree	Sometimes	Yes	Yes	Yes	No	Yes	Sometimes
436	Male	12-20	Secondary (6-10)	Single	Student	Join	≥5	<20,000	Urban area	More accurate	More Positive	Less frequent	Yes	Don't know	Yes	Yes	Yes	No	Agree	Agree	Agree	Agree	Agree	Agree	Yes	Yes	Sometimes	Sometimes	No	Sometimes	Yes
437	Male	12-20	Bachelor	Single	Student	Join	≥5	<20,000	Urban area	More accurate	More Positive	Less frequent	No	No	Yes	Yes	Don't know	No	Agree	Agree	Agree	Agree	Agree	Agree	Yes	Yes	Sometimes	Yes	No	Sometimes	Yes
438	Male	21-30	Bachelor	Single	Student	Join	≥5	<20,000	Urban area	More accurate	More Positive	Less frequent	Yes	Yes	Yes	Yes	Yes	No	Agree	Agree	Agree	Agree	Agree	Agree	Yes	Yes	Yes	Yes	No	Yes	Sometimes
439	Male	21-30	Bachelor	Single	Student	Join	≥5	<20,000	Urban area	More accurate	More Positive	Less frequent	Yes	No	Yes	Yes	No	No	Agree	Agree	Agree	Agree	Agree	Agree	Yes	Yes	Yes	Sometimes	Yes	Sometimes	Sometimes
440	Male	21-30	Intermediate (11-12)	Single	Businessman	Join	≥5	<20,000	Rural area	More accurate	More Positive	Less frequent	Yes	Yes	Yes	Yes	No	No	Agree	Agree	Agree	Agree	Agree	Agree	Yes	Yes	Yes	Yes	No	Sometimes	Yes
441	Male	12-20	Bachelor	Single	Student	Join	<5	<20,000	Urban area	More accurate	More Positive	Less frequent	Yes	Don't know	Yes	Yes	Don't know	No	Agree	Agree	Agree	Agree	Agree	Agree	No	Yes	No	No	No	No	No
442	Male	12-20	Intermediate (11-12)	Single	Student	Join	≥5	<20,000	Urban area	More accurate	More Positive	Less frequent	Yes	Yes	Yes	Yes	Yes	No	Agree	Agree	Agree	Agree	Agree	Agree	Sometimes	Yes	Sometimes	Yes	No	Yes	Yes
443	Male	12-20	Intermediate (11-12)	Single	Student	Join	<5	<20,000	Rural area	More accurate	More Positive	Less frequent	Yes	Yes	Yes	Yes	Yes	No	Agree	Agree	Agree	Undecided	Agree	Agree	Sometimes	Yes	Sometimes	Yes	No	Yes	Yes
444	Female	21-30	Bachelor	Single	Student	Join	<5	<20,000	Urban area	More accurate	More Positive	Less frequent	Yes	No	Yes	Yes	Don't know	No	Agree	Agree	Agree	Agree	Agree	Agree	Yes	Yes	Yes	Sometimes	Yes	Sometimes	No
445	Female	12-20	Bachelor	Single	Student	Join	≥5	<20,000	Urban area	More accurate	More Positive	Less frequent	Yes	No	Yes	Yes	Yes	Don't know	Agree	Agree	Agree	Agree	Agree	Agree	Yes	Yes	Sometimes	Yes	No	Yes	Yes
446	Female	21-30	Bachelor	Single	Student	Join	<5	<20,000	Urban area	More accurate	More Positive	Less frequent	Yes	No	Yes	Yes	No	No	Agree	Agree	Agree	Agree	Agree	Agree	Yes	Yes	Sometimes	Yes	No	Sometimes	Sometimes
447	Male	21-30	Bachelor	Married	Businessman	Join	≥5	<20,000	Urban area	More accurate	More Positive	Less frequent	Yes	Yes	Yes	Yes	No	No	Agree	Agree	Agree	Agree	Agree	Agree	Sometimes	Yes	Sometimes	Yes	No	Sometimes	No
448	Male	21-30	Highier education (avobe bachelor)	Married	Student	Join	<5	<20,000	Urban area	More accurate	More Positive	Less frequent	Yes	No	Yes	Yes	Yes	No	Agree	Agree	Agree	Agree	Agree	Agree	Sometimes	Yes	Sometimes	Sometimes	No	Sometimes	Sometimes
449	Male	12-20	Bachelor	Single	Student	Nuclear	<5	20,000-30,000	Rural area	More accurate	More Positive	Less frequent	Yes	Yes	Yes	Yes	Yes	Yes	Agree	Agree	Agree	Agree	Agree	Agree	Sometimes	Yes	Sometimes	Yes	No	Yes	Sometimes
450	Male	12-20	Bachelor	Single	Student	Nuclear	<5	20,000-30,000	Rural area	More accurate	More Positive	Less frequent	Yes	No	Yes	Yes	Yes	No	Agree	Agree	Agree	Undecided	Agree	Agree	Yes	Yes	Sometimes	Yes	No	Sometimes	Yes
451	Male	21-30	Bachelor	Single	Student	Nuclear	<5	20,000-30,000	Urban area	More accurate	More Positive	Less frequent	Yes	Yes	Yes	Yes	Don't know	No	Agree	Agree	Agree	Agree	Agree	Agree	Yes	Yes	Sometimes	Yes	No	Yes	Sometimes
452	Male	21-30	Bachelor	Single	Student	Nuclear	<5	20,000-30,000	Rural area	More accurate	More Positive	Less frequent	Yes	No	Yes	Yes	Yes	No	Agree	Agree	Agree	Agree	Agree	Agree	Sometimes	Yes	Yes	Yes	No	Yes	Yes
453	Male	21-30	Bachelor	Single	Student	Nuclear	<5	20,000-30,000	Rural area	More accurate	More Positive	Less frequent	Yes	No	Yes	Yes	No	No	Agree	Agree	Agree	Agree	Agree	Agree	Sometimes	Yes	Yes	Yes	No	Yes	Yes
454	Male	21-30	Bachelor	Single	Student	Nuclear	<5	20,000-30,000	Rural area	More accurate	More Positive	Less frequent	Yes	Yes	Yes	Yes	No	No	Agree	Agree	Agree	Agree	Agree	Agree	Yes	Yes	No	No	Yes	Sometimes	No
455	Male	21-30	Bachelor	Single	Student	Nuclear	<5	20,000-30,000	Rural area	More accurate	More Positive	Less frequent	Yes	No	Yes	Yes	No	No	Agree	Agree	Agree	Agree	Agree	Agree	Sometimes	Yes	Sometimes	Yes	No	Yes	Yes
456	Male	12-20	Bachelor	Single	Student	Nuclear	<5	20,000-30,000	Rural area	More accurate	More Positive	Less frequent	Yes	Yes	Yes	Yes	No	No	Agree	Agree	Agree	Agree	Agree	Agree	No	Yes	Yes	Yes	No	Yes	Yes
457	Male	21-30	Bachelor	Single	Student	Nuclear	<5	20,000-30,000	Rural area	More accurate	More Positive	Less frequent	Yes	Don't know	Yes	Yes	Don't know	No	Agree	Agree	Agree	Agree	Undecided	Agree	Yes	Yes	Sometimes	Yes	No	Yes	Yes
458	Male	12-20	Bachelor	Single	Student	Nuclear	≥5	20,000-30,000	Urban area	Less accurate	More Positive	Less frequent	Yes	Yes	Yes	Yes	Don't know	Don't know	Agree	Agree	Agree	Agree	Undecided	Agree	Sometimes	Yes	Sometimes	Yes	No	Sometimes	Sometimes
459	Male	12-20	Intermediate (11-12)	Single	Student	Nuclear	<5	20,000-30,000	Rural area	More accurate	More Positive	Less frequent	Yes	Yes	Yes	Yes	Yes	No	Agree	Agree	Agree	Agree	Undecided	Agree	Sometimes	Yes	Yes	Yes	No	Yes	Yes
460	Male	21-30	Bachelor	Single	Student	Nuclear	<5	20,000-30,000	Urban area	More accurate	More Positive	Less frequent	Yes	Yes	Yes	Yes	No	No	Agree	Agree	Agree	Agree	Agree	Agree	Yes	Yes	Yes	Yes	No	Sometimes	Yes
461	Male	21-30	Bachelor	Single	Student	Nuclear	<5	20,000-30,000	Rural area	Less accurate	More Positive	Less frequent	Yes	Don't know	Yes	Yes	No	Don't know	Agree	Agree	Agree	Agree	Undecided	Agree	No	Yes	No	Yes	No	Sometimes	Yes
462	Male	21-30	Highier education (avobe bachelor)	Single	Student	Nuclear	≥5	20,000-30,000	Urban area	More accurate	More Positive	Less frequent	Yes	Yes	Yes	Yes	No	No	Agree	Agree	Agree	Agree	Agree	Agree	Yes	Yes	Sometimes	Sometimes	No	Sometimes	Yes
463	Male	12-20	Bachelor	Single	Student	Nuclear	<5	20,000-30,000	Rural area	More accurate	More Positive	Less frequent	Yes	Yes	Yes	Yes	Yes	No	Agree	Agree	Agree	Agree	Agree	Agree	Yes	Yes	Sometimes	Yes	No	Yes	Yes
464	Male	21-30	Bachelor	Single	Non-govt. empolyee	Nuclear	<5	20,000-30,000	Rural area	More accurate	More Positive	Less frequent	Yes	Yes	Yes	Yes	No	No	Agree	Agree	Agree	Agree	Agree	Agree	Yes	Yes	Sometimes	Yes	No	Yes	Yes
465	Male	21-30	Bachelor	Single	Student	Nuclear	<5	20,000-30,000	Urban area	More accurate	More Positive	Less frequent	Yes	No	Yes	Yes	Yes	No	Agree	Agree	Agree	Agree	Agree	Agree	Yes	Yes	Sometimes	Yes	No	Yes	Yes
466	Male	21-30	Bachelor	Single	Student	Nuclear	<5	20,000-30,000	Rural area	More accurate	More Positive	Less frequent	Yes	No	Yes	Yes	No	No	Agree	Agree	Agree	Agree	Agree	Agree	Sometimes	Yes	Sometimes	Yes	No	Sometimes	Yes
467	Male	21-30	Bachelor	Single	Student	Nuclear	<5	20,000-30,000	Rural area	More accurate	More Positive	Less frequent	Yes	No	Yes	Yes	Don't know	No	Agree	Agree	Agree	Agree	Agree	Agree	Yes	Yes	Sometimes	Sometimes	Yes	Sometimes	Yes
468	Male	21-30	Bachelor	Single	Student	Nuclear	<5	20,000-30,000	Urban area	More accurate	More Positive	Less frequent	Yes	Don't know	Yes	Yes	Don't know	No	Agree	Agree	Agree	Undecided	Agree	Agree	Sometimes	Yes	Yes	Yes	Yes	Sometimes	Sometimes
469	Male	12-20	Bachelor	Single	Student	Nuclear	<5	20,000-30,000	Rural area	More accurate	More Positive	Less frequent	Yes	No	Yes	Yes	No	No	Agree	Agree	Agree	Agree	Agree	Agree	Sometimes	Yes	Yes	Yes	No	Yes	Yes
470	Male	21-30	Highier education (avobe bachelor)	Single	Student	Nuclear	<5	20,000-30,000	Urban area	More accurate	More Positive	Less frequent	Yes	Yes	Yes	Yes	Don't know	No	Agree	Agree	Agree	Agree	Agree	Agree	Sometimes	Yes	Sometimes	Yes	No	Yes	Yes
471	Female	12-20	Bachelor	Single	Student	Nuclear	<5	20,000-30,000	Rural area	More accurate	More Positive	Less frequent	Yes	No	Yes	Yes	Yes	No	Agree	Agree	Agree	Agree	Agree	Agree	Yes	Yes	Sometimes	Yes	No	Yes	Yes
472	Female	21-30	Bachelor	Single	Student	Nuclear	<5	20,000-30,000	Rural area	More accurate	More Positive	Less frequent	Yes	Yes	Yes	Yes	Yes	No	Agree	Agree	Agree	Agree	Agree	Agree	Yes	Yes	Sometimes	Yes	No	Yes	Yes
473	Female	12-20	Bachelor	Single	Student	Nuclear	<5	20,000-30,000	Urban area	More accurate	More Positive	Less frequent	Yes	No	Yes	Yes	No	No	Agree	Agree	Agree	Agree	Agree	Agree	Yes	Yes	Sometimes	Yes	No	Yes	Yes
474	Female	12-20	Bachelor	Single	Student	Nuclear	<5	20,000-30,000	Urban area	More accurate	More Positive	Less frequent	Yes	No	Yes	Yes	No	No	Agree	Agree	Agree	Agree	Agree	Agree	Yes	Yes	Sometimes	Yes	No	Yes	Yes
475	Female	12-20	Bachelor	Single	Student	Nuclear	<5	20,000-30,000	Urban area	More accurate	More Positive	Less frequent	Yes	No	Yes	Yes	No	No	Agree	Agree	Agree	Agree	Agree	Agree	Yes	Yes	Sometimes	Yes	No	Yes	Yes
476	Female	12-20	Bachelor	Single	Student	Nuclear	<5	20,000-30,000	Urban area	More accurate	More Positive	Less frequent	Yes	No	Yes	Yes	No	No	Agree	Agree	Agree	Agree	Agree	Agree	Yes	Yes	Sometimes	Yes	No	Yes	Yes
477	Female	12-20	Bachelor	Single	Student	Nuclear	≥5	20,000-30,000	Rural area	More accurate	More Positive	Less frequent	Yes	No	Yes	Yes	No	No	Agree	Agree	Agree	Agree	Agree	Agree	Yes	Yes	Sometimes	Yes	No	Yes	Yes
478	Female	12-20	Bachelor	Single	Student	Nuclear	<5	20,000-30,000	Rural area	More accurate	More Positive	Less frequent	Yes	Don't know	Yes	Yes	Yes	No	Agree	Agree	Agree	Agree	Agree	Agree	Yes	Yes	Sometimes	Yes	No	Yes	Yes
479	Female	21-30	Highier education (avobe bachelor)	Single	Student	Nuclear	<5	20,000-30,000	Urban area	More accurate	More Positive	Less frequent	Yes	No	Yes	Yes	Yes	No	Agree	Agree	Agree	Agree	Agree	Agree	Sometimes	Yes	Yes	Yes	No	Yes	Yes
480	Female	21-30	Highier education (avobe bachelor)	Single	Student	Nuclear	<5	20,000-30,000	Urban area	More accurate	More Positive	Less frequent	Yes	Yes	Yes	Yes	Don't know	No	Agree	Agree	Agree	Agree	Agree	Agree	Yes	Yes	Sometimes	Yes	No	Sometimes	Sometimes
481	Female	12-20	Intermediate (11-12)	Single	Student	Nuclear	≥5	20,000-30,000	Rural area	More accurate	More Positive	Less frequent	Yes	No	Yes	Yes	No	No	Agree	Agree	Agree	Agree	Agree	Agree	Yes	Yes	Sometimes	Yes	No	Yes	Yes
482	Female	12-20	Bachelor	Single	Student	Nuclear	<5	20,000-30,000	Rural area	More accurate	More Positive	Less frequent	Yes	Yes	Yes	Yes	No	No	Agree	Agree	Agree	Agree	Agree	Agree	Sometimes	Yes	Yes	Yes	No	Sometimes	Yes
483	Female	21-30	Highier education (avobe bachelor)	Single	Student	Nuclear	<5	20,000-30,000	Urban area	More accurate	More Positive	Less frequent	Yes	Don't know	Yes	Yes	Don't know	No	Agree	Agree	Agree	Agree	Undecided	Agree	Sometimes	Yes	Sometimes	Yes	No	Yes	Yes
484	Female	21-30	Bachelor	Single	Student	Nuclear	<5	20,000-30,000	Rural area	More accurate	More Positive	Less frequent	Yes	Yes	Yes	Yes	No	No	Agree	Agree	Agree	Agree	Undecided	Agree	Yes	Yes	Sometimes	Yes	No	Yes	Yes
485	Female	12-20	Bachelor	Single	Student	Nuclear	<5	20,000-30,000	Rural area	More accurate	More Positive	Less frequent	Yes	Don't know	Yes	Yes	Don't know	No	Agree	Agree	Agree	Agree	Agree	Agree	Yes	Yes	Sometimes	Yes	No	Yes	Yes
486	Female	>30	Highier education (avobe bachelor)	Single	Govt. employee	Nuclear	<5	20,000-30,000	Rural area	More accurate	More Positive	Less frequent	Yes	No	Yes	Yes	Yes	No	Agree	Agree	Agree	Agree	Agree	Agree	Yes	Yes	No	Sometimes	No	Yes	Yes
487	Female	21-30	Bachelor	Single	Student	Nuclear	<5	20,000-30,000	Rural area	More accurate	More Positive	Less frequent	Yes	No	Yes	Yes	No	No	Agree	Agree	Agree	Agree	Agree	Agree	Yes	Yes	Sometimes	Yes	No	Yes	Yes
488	Female	21-30	Highier education (avobe bachelor)	Single	Non-govt. empolyee	Nuclear	≥5	20,000-30,000	Rural area	More accurate	More Positive	Less frequent	Yes	Yes	Yes	Yes	No	No	Agree	Agree	Agree	Agree	Agree	Agree	Yes	Yes	Sometimes	Yes	No	Yes	No
489	Female	12-20	Bachelor	Single	Student	Nuclear	<5	20,000-30,000	Rural area	More accurate	More Positive	Less frequent	Yes	Yes	Yes	Yes	No	No	Agree	Agree	Agree	Agree	Agree	Agree	Yes	Yes	Sometimes	Yes	No	Yes	Yes
490	Female	12-20	Intermediate (11-12)	Single	Student	Nuclear	<5	20,000-30,000	Rural area	More accurate	More Positive	Less frequent	Yes	No	Yes	Yes	No	No	Agree	Agree	Agree	Agree	Agree	Agree	No	Yes	Sometimes	Yes	No	Yes	Sometimes
491	Female	21-30	Highier education (avobe bachelor)	Single	Student	Nuclear	≥5	20,000-30,000	Rural area	More accurate	More Positive	Less frequent	Yes	No	Yes	Yes	Don't know	No	Agree	Agree	Agree	Agree	Agree	Agree	Yes	Yes	Sometimes	Yes	Yes	Sometimes	Yes
492	Male	21-30	Intermediate (11-12)	Married	Student	Nuclear	<5	20,000-30,000	Rural area	More accurate	More Positive	Less frequent	Yes	Don't know	Yes	Yes	Don't know	No	Agree	Agree	Agree	Agree	Agree	Agree	Sometimes	Yes	No	Yes	No	Sometimes	Yes
493	Male	21-30	Bachelor	Married	Student	Nuclear	≥5	20,000-30,000	Rural area	More accurate	More Positive	Less frequent	Yes	Yes	Yes	Yes	No	No	Agree	Agree	Agree	Agree	Agree	Agree	Yes	Yes	Sometimes	Yes	No	Yes	Yes
494	Male	>30	Bachelor	Married	Non-govt. empolyee	Nuclear	<5	20,000-30,000	Rural area	More accurate	More Positive	Less frequent	Yes	No	Yes	Yes	No	No	Agree	Agree	Agree	Agree	Agree	Agree	Yes	Yes	Sometimes	Yes	No	Yes	Yes
495	Male	21-30	Highier education (avobe bachelor)	Married	Govt. employee	Nuclear	<5	20,000-30,000	Rural area	More accurate	More Positive	Less frequent	Yes	No	Yes	Yes	No	No	Agree	Agree	Agree	Agree	Agree	Agree	No	Yes	No	Yes	Yes	Yes	Yes
496	Female	21-30	Highier education (avobe bachelor)	Married	Govt. employee	Nuclear	<5	20,000-30,000	Urban area	More accurate	More Positive	Less frequent	Yes	Yes	Yes	Yes	Don't know	No	Agree	Agree	Agree	Agree	Agree	Agree	Sometimes	Yes	Yes	Yes	No	Sometimes	Sometimes
497	Male	21-30	Intermediate (11-12)	Single	Student	Join	≥5	20,000-30,000	Rural area	More accurate	More Positive	Less frequent	Yes	Yes	Yes	Yes	Yes	No	Agree	Agree	Agree	Agree	Agree	Agree	Yes	Yes	Sometimes	Yes	No	Yes	Yes
498	Male	21-30	Bachelor	Single	Student	Join	<5	20,000-30,000	Urban area	More accurate	More Positive	Less frequent	Yes	Yes	Yes	Yes	Yes	No	Agree	Agree	Agree	Agree	Agree	Agree	Sometimes	Yes	Sometimes	Sometimes	No	Sometimes	Sometimes
499	Male	21-30	Intermediate (11-12)	Single	Student	Join	≥5	20,000-30,000	Urban area	Less accurate	More Positive	Less frequent	Yes	Yes	Yes	Yes	Don't know	Don't know	Agree	Agree	Agree	Agree	Undecided	Agree	Sometimes	Yes	Sometimes	No	No	Sometimes	Yes
500	Male	21-30	Highier education (avobe bachelor)	Single	Student	Join	≥5	20,000-30,000	Rural area	More accurate	More Positive	Less frequent	Yes	No	Yes	Yes	Don't know	No	Agree	Agree	Agree	Undecided	Agree	Agree	Yes	Yes	Sometimes	Yes	No	Sometimes	Yes
501	Male	21-30	Bachelor	Married	Non-govt. empolyee	Join	≥5	20,000-30,000	Urban area	More accurate	More Positive	Less frequent	Yes	Yes	Yes	Yes	No	No	Agree	Agree	Agree	Agree	Agree	Agree	Yes	Yes	Sometimes	Sometimes	No	Yes	Yes
502	Male	21-30	Highier education (avobe bachelor)	Married	Businessman	Join	<5	20,000-30,000	Urban area	More accurate	More Positive	Less frequent	Yes	No	Yes	Yes	No	No	Agree	Agree	Agree	Agree	Agree	Agree	No	Yes	Sometimes	Yes	Yes	Yes	Yes
503	Female	12-20	Bachelor	Married	Student	Join	<5	20,000-30,000	Urban area	More accurate	More Positive	Less frequent	Yes	Yes	Yes	Yes	Yes	No	Agree	Agree	Agree	Agree	Agree	Agree	Sometimes	Yes	Sometimes	Yes	Yes	Yes	Yes
504	Male	21-30	Bachelor	Single	Student	Nuclear	<5	>30,000	Rural area	More accurate	More Positive	Less frequent	Yes	No	Yes	Yes	No	No	Agree	Agree	Agree	Agree	Agree	Agree	Sometimes	Yes	Sometimes	No	No	Yes	Yes
505	Male	12-20	Bachelor	Single	Student	Nuclear	<5	>30,000	Rural area	More accurate	More Positive	Less frequent	Yes	Yes	Yes	Yes	No	No	Agree	Agree	Agree	Agree	Agree	Agree	Sometimes	Yes	Sometimes	Yes	No	Yes	Yes
506	Male	21-30	Highier education (avobe bachelor)	Single	Student	Nuclear	≥5	>30,000	Rural area	More accurate	More Positive	Less frequent	Yes	No	Yes	Yes	Don't know	Don't know	Agree	Agree	Agree	Agree	Agree	Agree	Yes	Yes	Sometimes	Yes	Yes	Sometimes	Yes
507	Male	12-20	Bachelor	Single	Student	Nuclear	<5	>30,000	Rural area	More accurate	More Positive	Less frequent	Yes	Yes	Yes	Yes	Yes	No	Agree	Agree	Agree	Agree	Agree	Agree	Yes	Yes	Sometimes	Yes	No	Yes	Yes
508	Male	21-30	Bachelor	Single	Student	Nuclear	≥5	>30,000	Rural area	More accurate	More Positive	Less frequent	Yes	Don't know	Yes	Yes	Don't know	No	Agree	Agree	Agree	Agree	Agree	Agree	Sometimes	Yes	Sometimes	Yes	No	Yes	Sometimes
509	Male	12-20	Bachelor	Single	Student	Nuclear	<5	>30,000	Rural area	More accurate	More Positive	Less frequent	Yes	Yes	Yes	Yes	No	No	Agree	Agree	Agree	Agree	Undecided	Agree	Sometimes	Yes	No	Yes	No	Sometimes	Yes
510	Male	12-20	Bachelor	Single	Student	Nuclear	<5	>30,000	Rural area	More accurate	More Positive	Less frequent	Yes	Don't know	Yes	Yes	No	No	Agree	Agree	Agree	Agree	Agree	Agree	Yes	Yes	Sometimes	Yes	No	Sometimes	Yes
511	Male	21-30	Bachelor	Single	Student	Nuclear	<5	>30,000	Rural area	More accurate	More Positive	Less frequent	Yes	No	Yes	Yes	No	No	Agree	Agree	Agree	Agree	Agree	Agree	Sometimes	Yes	Sometimes	Yes	Yes	Yes	Yes
512	Male	12-20	Secondary (6-10)	Single	Student	Nuclear	<5	>30,000	Rural area	More accurate	More Positive	Less frequent	Yes	No	Yes	Yes	Don't know	Yes	Agree	Agree	Agree	Agree	Undecided	Agree	Yes	Yes	Sometimes	Yes	Yes	Sometimes	Yes
513	Male	12-20	Bachelor	Single	Student	Nuclear	<5	>30,000	Rural area	More accurate	More Positive	Less frequent	Yes	Yes	Yes	Yes	No	No	Agree	Agree	Agree	Agree	Undecided	Agree	Sometimes	Yes	No	Yes	No	Yes	Yes
514	Male	21-30	Bachelor	Single	Student	Nuclear	<5	>30,000	Urban area	More accurate	More Positive	Less frequent	Yes	No	Yes	Yes	Yes	No	Agree	Agree	Agree	Agree	Undecided	Agree	Yes	Yes	Yes	Yes	No	Sometimes	Yes
515	Male	21-30	Bachelor	Single	Student	Nuclear	<5	>30,000	Rural area	More accurate	More Positive	Less frequent	Yes	Yes	Yes	Yes	Yes	No	Agree	Agree	Agree	Agree	Agree	Agree	Sometimes	Yes	Sometimes	Yes	Yes	Yes	Yes
516	Male	12-20	Intermediate (11-12)	Single	Student	Nuclear	<5	>30,000	Urban area	More accurate	More Positive	Less frequent	Yes	Yes	Yes	Yes	No	No	Agree	Agree	Agree	Agree	Agree	Agree	Yes	Yes	Sometimes	Yes	No	Yes	Yes
517	Male	12-20	Bachelor	Single	Student	Nuclear	<5	>30,000	Rural area	More accurate	More Positive	Less frequent	Yes	Yes	Yes	Yes	No	No	Agree	Agree	Agree	Agree	Agree	Agree	Yes	Yes	Sometimes	Yes	No	Yes	Yes
518	Male	12-20	Bachelor	Single	Student	Nuclear	≥5	>30,000	Urban area	More accurate	More Positive	Less frequent	Yes	No	Yes	Yes	Yes	No	Agree	Agree	Agree	Agree	Agree	Agree	No	Yes	Yes	Yes	No	Yes	Yes
519	Male	21-30	Bachelor	Single	Student	Nuclear	<5	>30,000	Rural area	More accurate	More Positive	Less frequent	Yes	No	Yes	Yes	Don't know	No	Agree	Agree	Agree	Agree	Agree	Agree	No	Yes	Yes	Yes	No	Yes	Yes
520	Male	21-30	Bachelor	Single	Student	Nuclear	<5	>30,000	Rural area	Less accurate	More Positive	Less frequent	Yes	Don't know	Yes	Yes	Don't know	Don't know	Agree	Agree	Agree	Agree	Undecided	Agree	Sometimes	Yes	Yes	Yes	No	Yes	Yes
521	Male	21-30	Bachelor	Single	Student	Nuclear	<5	>30,000	Urban area	More accurate	More Positive	Less frequent	Yes	Yes	Yes	Yes	Yes	No	Agree	Agree	Agree	Agree	Agree	Agree	Yes	Yes	Yes	Sometimes	No	Yes	Yes
522	Male	12-20	Bachelor	Single	Student	Nuclear	<5	>30,000	Urban area	More accurate	More Positive	Less frequent	Yes	Yes	Yes	Yes	Yes	No	Agree	Agree	Agree	Agree	Agree	Agree	Sometimes	Yes	Yes	Yes	No	Yes	Yes
523	Male	12-20	Bachelor	Single	Student	Nuclear	<5	>30,000	Rural area	More accurate	More Positive	Less frequent	Yes	Yes	Yes	Yes	Don't know	No	Agree	Agree	Agree	Agree	Undecided	Agree	Yes	Yes	Sometimes	Yes	No	Yes	Yes
524	Male	12-20	Secondary (6-10)	Single	Student	Nuclear	<5	>30,000	Urban area	More accurate	More Positive	Less frequent	Yes	Yes	Yes	Yes	Don't know	No	Agree	Agree	Agree	Agree	Agree	Agree	Yes	Yes	Sometimes	Sometimes	No	Yes	Yes
525	Male	12-20	Bachelor	Single	Student	Nuclear	<5	>30,000	Rural area	More accurate	More Positive	Less frequent	Yes	No	Yes	Yes	No	No	Agree	Agree	Agree	Agree	Agree	Agree	Yes	Yes	Sometimes	Yes	No	Yes	Yes
526	Male	21-30	Highier education (avobe bachelor)	Single	Non-govt. empolyee	Nuclear	<5	>30,000	Urban area	More accurate	More Positive	Less frequent	Yes	No	Yes	Yes	No	No	Agree	Agree	Agree	Agree	Agree	Agree	Sometimes	Yes	Yes	Yes	No	Yes	Sometimes
527	Male	12-20	Bachelor	Single	Student	Nuclear	<5	>30,000	Urban area	More accurate	More Positive	Less frequent	Yes	Yes	Yes	Yes	No	No	Agree	Agree	Agree	Undecided	Agree	Agree	Sometimes	Yes	No	Yes	No	Yes	Yes
528	Male	21-30	Highier education (avobe bachelor)	Single	Student	Nuclear	<5	>30,000	Rural area	More accurate	More Positive	Less frequent	Yes	No	Yes	Yes	No	Don't know	Agree	Agree	Agree	Agree	Agree	Agree	Yes	Yes	Sometimes	Yes	No	Yes	Yes
529	Male	12-20	Bachelor	Single	Govt. employee	Nuclear	<5	>30,000	Rural area	More accurate	More Positive	Less frequent	Yes	Don't know	Yes	Yes	Yes	No	Agree	Agree	Agree	Agree	Agree	Agree	Yes	Yes	Sometimes	Yes	No	Yes	Yes
530	Male	12-20	Bachelor	Single	Student	Nuclear	<5	>30,000	Rural area	More accurate	More Positive	Less frequent	Yes	No	Yes	Yes	Don't know	No	Agree	Agree	Agree	Agree	Undecided	Agree	Yes	Yes	Sometimes	Yes	Yes	Yes	Sometimes
531	Male	>30	Highier education (avobe bachelor)	Single	Non-govt. empolyee	Nuclear	<5	>30,000	Rural area	More accurate	More Positive	Less frequent	Yes	No	Yes	Yes	Don't know	No	Agree	Agree	Agree	Agree	Agree	Agree	Yes	Yes	Sometimes	Sometimes	No	Yes	No
532	Male	21-30	Bachelor	Single	Govt. employee	Nuclear	<5	>30,000	Rural area	More accurate	More Positive	Less frequent	Yes	No	Yes	Yes	No	No	Agree	Agree	Agree	Agree	Agree	Agree	Yes	Yes	No	No	Yes	Yes	Yes
533	Male	21-30	Highier education (avobe bachelor)	Single	Student	Nuclear	<5	>30,000	Urban area	More accurate	More Positive	Less frequent	Yes	Yes	Yes	Yes	Don't know	No	Agree	Agree	Agree	Agree	Agree	Agree	Sometimes	Yes	Sometimes	Yes	No	Yes	Yes
534	Male	21-30	Bachelor	Single	Businessman	Nuclear	<5	>30,000	Rural area	More accurate	More Positive	Less frequent	Yes	No	Yes	Yes	Yes	No	Agree	Agree	Agree	Agree	Agree	Agree	Sometimes	Yes	Sometimes	Yes	No	Yes	Yes
535	Female	21-30	Bachelor	Single	Student	Nuclear	<5	>30,000	Rural area	More accurate	More Positive	Less frequent	Yes	No	Yes	Yes	Yes	No	Agree	Agree	Agree	Agree	Agree	Agree	Yes	Yes	Sometimes	Yes	No	Sometimes	Sometimes
536	Female	12-20	Bachelor	Single	Student	Nuclear	<5	>30,000	Rural area	More accurate	More Positive	Less frequent	Yes	No	Yes	Yes	Don't know	No	Agree	Agree	Agree	Agree	Undecided	Agree	Yes	Yes	Sometimes	Yes	No	Yes	Yes
537	Female	12-20	Intermediate (11-12)	Single	Student	Nuclear	<5	>30,000	Rural area	More accurate	More Positive	Less frequent	Yes	No	Yes	Yes	Yes	No	Agree	Agree	Agree	Agree	Agree	Agree	Sometimes	Yes	Sometimes	Yes	No	Sometimes	Yes
538	Female	12-20	Bachelor	Single	Student	Nuclear	<5	>30,000	Rural area	More accurate	More Positive	Less frequent	No	No	Yes	Yes	Yes	No	Agree	Agree	Agree	Agree	Agree	Agree	Yes	Yes	Sometimes	Yes	No	Sometimes	Yes
539	Female	12-20	Bachelor	Single	Student	Nuclear	<5	>30,000	Rural area	More accurate	More Positive	Less frequent	Yes	Yes	Yes	Yes	No	No	Agree	Agree	Agree	Agree	Undecided	Agree	Yes	Yes	Sometimes	Yes	No	Yes	Yes
540	Female	21-30	Intermediate (11-12)	Single	Student	Nuclear	<5	>30,000	Rural area	More accurate	More Positive	Less frequent	Yes	No	Yes	Yes	Yes	No	Agree	Agree	Agree	Agree	Agree	Agree	Yes	Yes	Sometimes	Yes	No	Yes	Yes
541	Female	12-20	Intermediate (11-12)	Single	Student	Nuclear	<5	>30,000	Rural area	More accurate	More Positive	Less frequent	Yes	No	Yes	Yes	No	No	Agree	Agree	Agree	Agree	Agree	Agree	Sometimes	Yes	Sometimes	Yes	Yes	Yes	Yes
542	Female	12-20	Bachelor	Single	Student	Nuclear	<5	>30,000	Rural area	More accurate	More Positive	Less frequent	Yes	No	Yes	Yes	Yes	No	Agree	Agree	Agree	Agree	Agree	Agree	Sometimes	Yes	Sometimes	Yes	No	Yes	Yes
543	Female	12-20	Bachelor	Single	Student	Nuclear	<5	>30,000	Urban area	More accurate	More Positive	Less frequent	Yes	No	Yes	Yes	Yes	No	Agree	Agree	Agree	Agree	Agree	Agree	No	Yes	Sometimes	Yes	No	Yes	Yes
544	Female	21-30	Bachelor	Single	Student	Nuclear	<5	>30,000	Rural area	More accurate	More Positive	Less frequent	Yes	Yes	Yes	Yes	Don't know	No	Agree	Agree	Agree	Agree	Undecided	Agree	Yes	Yes	Sometimes	Yes	No	Yes	Yes
545	Female	12-20	Secondary (6-10)	Single	Student	Nuclear	<5	>30,000	Rural area	More accurate	More Positive	Less frequent	Yes	No	Yes	Yes	No	No	Agree	Agree	Agree	Agree	Agree	Agree	Yes	Yes	Yes	Sometimes	Yes	Yes	Sometimes
546	Female	12-20	Bachelor	Single	Student	Nuclear	<5	>30,000	Rural area	More accurate	More Positive	Less frequent	No	No	Yes	Yes	Yes	No	Agree	Agree	Agree	Agree	Agree	Agree	Sometimes	Yes	Yes	Yes	No	Yes	Yes
547	Female	21-30	Bachelor	Single	Non-govt. empolyee	Nuclear	<5	>30,000	Rural area	More accurate	More Positive	Less frequent	Yes	Yes	Yes	Yes	Yes	No	Agree	Agree	Agree	Agree	Agree	Agree	Yes	Yes	Sometimes	Yes	No	Yes	Yes
548	Female	21-30	Bachelor	Single	Student	Nuclear	≥5	>30,000	Rural area	More accurate	More Positive	Less frequent	Yes	No	Yes	Yes	Don't know	Don't know	Agree	Agree	Agree	Agree	Agree	Agree	Yes	Yes	Sometimes	Yes	No	Yes	Yes
549	Female	21-30	Bachelor	Single	Student	Nuclear	<5	>30,000	Rural area	More accurate	More Positive	Less frequent	Yes	No	Yes	Yes	Yes	No	Agree	Agree	Agree	Agree	Agree	Agree	Yes	Yes	Yes	Yes	No	No	Yes
550	Female	21-30	Bachelor	Single	Student	Nuclear	≥5	>30,000	Rural area	More accurate	More Positive	Less frequent	Yes	Don't know	Yes	Yes	Don't know	No	Agree	Agree	Agree	Agree	Undecided	Agree	Sometimes	Yes	Sometimes	Yes	Yes	Sometimes	Yes
551	Female	21-30	Bachelor	Single	Student	Nuclear	<5	>30,000	Rural area	More accurate	More Positive	Less frequent	Yes	Yes	Yes	Yes	No	No	Agree	Agree	Agree	Agree	Agree	Agree	Yes	Yes	Sometimes	Yes	No	Yes	Yes
552	Female	12-20	Intermediate (11-12)	Single	Student	Nuclear	<5	>30,000	Rural area	More accurate	More Positive	Less frequent	Yes	Don't know	Yes	Yes	Don't know	No	Agree	Agree	Agree	Agree	Agree	Agree	Yes	Yes	Yes	Yes	No	Sometimes	Yes
553	Female	12-20	Intermediate (11-12)	Single	Student	Nuclear	<5	>30,000	Rural area	More accurate	More Positive	Less frequent	Yes	Don't know	Yes	Yes	Yes	No	Agree	Agree	Agree	Agree	Agree	Agree	Yes	Yes	Yes	Yes	No	Sometimes	Yes
554	Female	12-20	Bachelor	Single	Student	Nuclear	≥5	>30,000	Rural area	More accurate	More Positive	Less frequent	Yes	Yes	Yes	Yes	No	No	Agree	Agree	Agree	Agree	Agree	Agree	Yes	Yes	No	Yes	No	Yes	Yes
555	Female	21-30	Intermediate (11-12)	Single	Student	Nuclear	≥5	>30,000	Rural area	More accurate	More Positive	Less frequent	Yes	No	Yes	Yes	Yes	No	Agree	Agree	Agree	Agree	Agree	Agree	Yes	Yes	No	Yes	No	Yes	Yes
556	Female	21-30	Bachelor	Single	Student	Nuclear	<5	>30,000	Rural area	More accurate	More Positive	Less frequent	Yes	No	Yes	Yes	No	No	Agree	Agree	Agree	Agree	Agree	Agree	Sometimes	Yes	Yes	Yes	No	Yes	Yes
557	Female	12-20	Bachelor	Single	Student	Nuclear	<5	>30,000	Rural area	More accurate	More Positive	Less frequent	Yes	No	Yes	Yes	Yes	No	Agree	Agree	Agree	Agree	Agree	Agree	Sometimes	Yes	Sometimes	Yes	No	Yes	Yes
558	Female	21-30	Bachelor	Single	Student	Nuclear	<5	>30,000	Rural area	More accurate	More Positive	Less frequent	Yes	Yes	Yes	Yes	Yes	No	Agree	Agree	Agree	Agree	Agree	Agree	Yes	Yes	Sometimes	Yes	No	Yes	Yes
559	Female	21-30	Highier education (avobe bachelor)	Single	Govt. employee	Nuclear	<5	>30,000	Rural area	More accurate	More Positive	Less frequent	Yes	Yes	Yes	Yes	No	No	Agree	Agree	Agree	Agree	Agree	Agree	Sometimes	Yes	Yes	Yes	No	Yes	Yes
560	Female	12-20	Bachelor	Single	Student	Nuclear	<5	>30,000	Rural area	More accurate	More Positive	Less frequent	Yes	Don't know	Yes	Yes	Don't know	No	Agree	Agree	Agree	Agree	Agree	Agree	Yes	Yes	No	Yes	No	Yes	Yes
561	Female	12-20	Bachelor	Single	Student	Nuclear	<5	>30,000	Rural area	More accurate	More Positive	Less frequent	Yes	Yes	Yes	Yes	Don't know	No	Agree	Agree	Agree	Agree	Undecided	Agree	Yes	Yes	Sometimes	Yes	No	Yes	Yes
562	Female	21-30	Bachelor	Single	Student	Nuclear	<5	>30,000	Rural area	More accurate	More Positive	Less frequent	Yes	No	Yes	Yes	No	No	Agree	Agree	Agree	Agree	Agree	Agree	Sometimes	Yes	Sometimes	Yes	No	Yes	Yes
563	Male	>30	Highier education (avobe bachelor)	Married	Govt. employee	Nuclear	<5	>30,000	Rural area	More accurate	More Positive	Less frequent	Yes	No	Yes	Yes	No	No	Agree	Agree	Agree	Agree	Agree	Agree	No	Yes	Sometimes	Yes	No	Sometimes	Yes
564	Male	21-30	Bachelor	Married	Non-govt. empolyee	Nuclear	<5	>30,000	Rural area	More accurate	More Positive	Less frequent	Yes	Yes	Yes	Yes	Yes	No	Agree	Agree	Agree	Agree	Agree	Agree	Yes	Yes	Sometimes	Yes	No	Yes	Yes
565	Male	>30	Highier education (avobe bachelor)	Married	Non-govt. empolyee	Nuclear	<5	>30,000	Rural area	More accurate	More Positive	Less frequent	Yes	Yes	Yes	Yes	No	No	Agree	Agree	Agree	Agree	Agree	Agree	Yes	Yes	Yes	Yes	No	Yes	Sometimes
566	Male	12-20	Bachelor	Married	Student	Nuclear	≥5	>30,000	Urban area	More accurate	More Positive	Less frequent	Yes	Yes	Yes	Yes	No	No	Agree	Agree	Agree	Agree	Agree	Agree	Yes	Yes	Sometimes	No	No	Sometimes	Sometimes
567	Male	21-30	Bachelor	Married	Non-govt. empolyee	Nuclear	<5	>30,000	Rural area	More accurate	More Positive	Less frequent	Yes	No	Yes	Yes	Yes	No	Agree	Agree	Agree	Agree	Agree	Agree	Sometimes	Yes	Sometimes	Yes	Yes	Yes	Yes
568	Male	21-30	Highier education (avobe bachelor)	Married	Non-govt. empolyee	Nuclear	<5	>30,000	Rural area	More accurate	More Positive	Less frequent	Yes	No	Yes	Yes	Yes	No	Agree	Agree	Agree	Agree	Agree	Agree	Yes	Yes	Sometimes	Yes	No	Yes	Yes
569	Male	21-30	Highier education (avobe bachelor)	Married	Govt. employee	Nuclear	≥5	>30,000	Rural area	More accurate	More Positive	Less frequent	Yes	No	Yes	Yes	No	No	Agree	Agree	Agree	Agree	Agree	Agree	Sometimes	Yes	Sometimes	Sometimes	Yes	Sometimes	Sometimes
570	Male	>30	Highier education (avobe bachelor)	Married	Govt. employee	Nuclear	<5	>30,000	Rural area	More accurate	More Positive	Less frequent	Yes	Yes	Yes	Yes	No	No	Agree	Agree	Agree	Agree	Agree	Agree	Yes	Yes	Sometimes	Yes	No	Yes	Yes
571	Male	21-30	Highier education (avobe bachelor)	Married	Non-govt. empolyee	Nuclear	<5	>30,000	Rural area	More accurate	More Positive	Less frequent	Yes	Yes	Yes	Yes	Don't know	No	Agree	Agree	Agree	Agree	Agree	Agree	Sometimes	Yes	Yes	Sometimes	Yes	Yes	Yes
572	Male	>30	Highier education (avobe bachelor)	Married	Non-govt. empolyee	Nuclear	<5	>30,000	Rural area	More accurate	More Positive	Less frequent	Yes	No	Yes	Yes	Don't know	Don't know	Agree	Agree	Agree	Undecided	Agree	Agree	Yes	Yes	Sometimes	Sometimes	No	Yes	Yes
573	Male	12-20	Bachelor	Married	Student	Nuclear	≥5	>30,000	Rural area	More accurate	More Positive	Less frequent	Yes	Yes	Yes	Yes	No	No	Agree	Agree	Agree	Agree	Agree	Agree	Yes	Yes	Sometimes	Yes	No	Yes	Yes
574	Male	21-30	Highier education (avobe bachelor)	Married	Student	Nuclear	<5	>30,000	Rural area	More accurate	More Positive	Less frequent	Yes	No	Yes	Yes	Yes	No	Agree	Agree	Agree	Agree	Agree	Agree	No	Yes	Yes	Sometimes	No	Sometimes	Sometimes
575	Male	21-30	Highier education (avobe bachelor)	Married	Non-govt. empolyee	Nuclear	<5	>30,000	Rural area	More accurate	More Positive	Less frequent	Yes	Yes	Yes	Yes	Don't know	No	Agree	Agree	Agree	Agree	Agree	Agree	Yes	Yes	Sometimes	Yes	No	Yes	Yes
576	Female	21-30	Highier education (avobe bachelor)	Married	Non-govt. empolyee	Nuclear	<5	>30,000	Rural area	More accurate	More Positive	Less frequent	Yes	Don't know	Yes	Yes	No	No	Agree	Agree	Agree	Agree	Agree	Agree	Sometimes	Yes	No	Yes	No	Sometimes	Yes
577	Female	>30	Secondary (6-10)	Married	Housewife	Nuclear	<5	>30,000	Rural area	More accurate	More Positive	Less frequent	Yes	Don't know	Yes	Yes	No	No	Agree	Agree	Agree	Agree	Agree	Agree	Sometimes	Yes	Yes	Yes	No	Yes	Yes
578	Female	>30	Highier education (avobe bachelor)	Married	Govt. employee	Nuclear	<5	>30,000	Rural area	Less accurate	More Positive	Less frequent	Yes	Yes	Yes	Yes	Don't know	Don't know	Agree	Agree	Agree	Agree	Undecided	Agree	Yes	Yes	Sometimes	Yes	No	Yes	Yes
579	Male	12-20	Bachelor	Single	Student	Join	≥5	>30,000	Rural area	More accurate	More Positive	Less frequent	Yes	No	Yes	Yes	Don't know	No	Agree	Agree	Agree	Agree	Agree	Agree	Yes	Yes	No	Yes	No	Yes	Yes
580	Male	21-30	Intermediate (11-12)	Single	Student	Join	≥5	>30,000	Urban area	More accurate	More Positive	Less frequent	Yes	Yes	Yes	Yes	No	No	Agree	Agree	Agree	Agree	Agree	Agree	Sometimes	Yes	Sometimes	Yes	No	Yes	Yes
581	Male	21-30	Highier education (avobe bachelor)	Single	Govt. employee	Join	≥5	>30,000	Rural area	More accurate	More Positive	Less frequent	Yes	Yes	Yes	Yes	Yes	No	Agree	Agree	Agree	Agree	Agree	Agree	Sometimes	Yes	Yes	Yes	Yes	Sometimes	Yes
582	Male	21-30	Highier education (avobe bachelor)	Single	Student	Join	<5	>30,000	Urban area	More accurate	More Positive	Less frequent	Yes	Yes	Yes	Yes	No	No	Agree	Agree	Agree	Agree	Agree	Agree	Yes	Yes	Sometimes	Yes	No	Yes	Yes
583	Male	21-30	Highier education (avobe bachelor)	Single	Student	Join	≥5	>30,000	Rural area	More accurate	More Positive	Less frequent	Yes	No	Yes	Yes	No	No	Agree	Agree	Agree	Agree	Agree	Agree	Yes	Yes	Sometimes	Yes	Yes	Yes	Sometimes
584	Male	21-30	Highier education (avobe bachelor)	Single	Non-govt. empolyee	Join	≥5	>30,000	Urban area	More accurate	More Positive	Less frequent	Yes	Yes	Yes	Yes	Yes	No	Agree	Agree	Agree	Agree	Undecided	Agree	Sometimes	Yes	Sometimes	Yes	Yes	Yes	Yes
585	Male	21-30	Highier education (avobe bachelor)	Single	Non-govt. empolyee	Join	≥5	>30,000	Urban area	More accurate	More Positive	Less frequent	Yes	Yes	Yes	Yes	Yes	No	Agree	Agree	Agree	Agree	Undecided	Agree	Sometimes	Yes	Sometimes	Yes	Yes	Yes	Yes
586	Male	21-30	Highier education (avobe bachelor)	Single	Govt. employee	Join	≥5	>30,000	Rural area	More accurate	More Positive	Less frequent	Yes	Yes	Yes	Yes	No	No	Agree	Agree	Agree	Agree	Agree	Agree	Yes	Yes	No	Yes	No	Yes	Yes
587	Male	21-30	Highier education (avobe bachelor)	Single	Unemployment	Join	≥5	>30,000	Urban area	More accurate	More Positive	Less frequent	Yes	No	Yes	Yes	No	No	Agree	Agree	Agree	Agree	Agree	Agree	Yes	Yes	Sometimes	Yes	No	Yes	Yes
588	Male	21-30	Highier education (avobe bachelor)	Single	Non-govt. empolyee	Join	≥5	>30,000	Urban area	More accurate	More Positive	Less frequent	Yes	Yes	Yes	Yes	Yes	No	Agree	Agree	Agree	Agree	Agree	Agree	Yes	Yes	Yes	Sometimes	No	No	Sometimes
589	Male	21-30	Highier education (avobe bachelor)	Single	Student	Join	≥5	>30,000	Urban area	More accurate	More Positive	Less frequent	Yes	Yes	Yes	Yes	No	No	Agree	Agree	Agree	Agree	Agree	Agree	Yes	Yes	Sometimes	Yes	No	Yes	Yes
590	Female	12-20	Bachelor	Single	Student	Join	≥5	>30,000	Urban area	More accurate	More Positive	Less frequent	Yes	No	Yes	Yes	No	No	Agree	Agree	Agree	Agree	Agree	Agree	Yes	Yes	Yes	Sometimes	No	Sometimes	Sometimes
591	Male	21-30	Highier education (avobe bachelor)	Married	Non-govt. empolyee	Join	≥5	>30,000	Rural area	More accurate	More Positive	Less frequent	Yes	Yes	Yes	Yes	Don't know	No	Agree	Agree	Agree	Agree	Agree	Agree	No	Yes	Yes	Yes	No	Yes	Yes
592	Male	>30	Bachelor	Married	Non-govt. empolyee	Join	≥5	>30,000	Rural area	More accurate	More Positive	Less frequent	Yes	Yes	Yes	Yes	Don't know	No	Agree	Agree	Agree	Agree	Agree	Agree	Yes	Yes	Sometimes	Yes	No	Yes	Yes
593	Male	>30	Highier education (avobe bachelor)	Married	Non-govt. empolyee	Join	≥5	>30,000	Rural area	More accurate	More Positive	Less frequent	Yes	No	Yes	Yes	No	No	Agree	Agree	Agree	Agree	Agree	Agree	Yes	Yes	Sometimes	Yes	No	Yes	Yes
594	Male	21-30	Highier education (avobe bachelor)	Married	Student	Join	<5	>30,000	Rural area	More accurate	More Positive	Less frequent	Yes	No	Yes	Yes	No	No	Agree	Agree	Agree	Agree	Agree	Agree	Yes	Yes	Sometimes	Yes	No	Yes	Yes
595	Male	>30	Highier education (avobe bachelor)	Married	Govt. employee	Join	<5	>30,000	Urban area	More accurate	More Positive	Less frequent	Yes	No	Yes	Yes	Yes	No	Agree	Agree	Agree	Agree	Agree	Agree	Yes	Yes	Yes	Sometimes	No	Sometimes	Sometimes
596	Female	21-30	Highier education (avobe bachelor)	Married	Govt. employee	Join	≥5	>30,000	Rural area	More accurate	More Positive	Less frequent	Yes	No	Yes	Yes	No	No	Agree	Agree	Agree	Agree	Agree	Agree	Yes	Yes	Sometimes	No	Yes	Yes	Yes
597	Female	21-30	Highier education (avobe bachelor)	Married	Housewife	Join	≥5	>30,000	Rural area	More accurate	More Positive	Less frequent	Yes	Yes	Yes	Yes	Yes	No	Agree	Agree	Agree	Agree	Agree	Agree	Sometimes	Yes	Sometimes	Yes	Yes	Yes	Yes
598	Female	21-30	Highier education (avobe bachelor)	Married	Non-govt. empolyee	Join	<5	>30,000	Rural area	More accurate	More Positive	Less frequent	Yes	Yes	Yes	Yes	Yes	No	Agree	Agree	Agree	Agree	Agree	Agree	Yes	Yes	Sometimes	Yes	No	Yes	Yes
599	Female	21-30	Highier education (avobe bachelor)	Married	Student	Join	≥5	>30,000	Rural area	More accurate	More Positive	Less frequent	Yes	Yes	Yes	Yes	Don't know	No	Agree	Agree	Agree	Agree	Agree	Agree	Yes	Yes	Sometimes	Yes	No	Yes	Yes
600	Female	21-30	Highier education (avobe bachelor)	Married	Govt. employee	Join	<5	>30,000	Rural area	More accurate	More Positive	Less frequent	Yes	No	Yes	Yes	Yes	No	Agree	Agree	Agree	Agree	Agree	Agree	Yes	Yes	No	Yes	No	Sometimes	Yes
601	Female	21-30	Bachelor	Married	Student	Join	≥5	>30,000	Rural area	More accurate	More Positive	Less frequent	Yes	No	Yes	Yes	No	No	Agree	Agree	Agree	Agree	Agree	Agree	Yes	Yes	Sometimes	Yes	No	Yes	Yes
602	Female	21-30	Highier education (avobe bachelor)	Married	Non-govt. empolyee	Join	<5	>30,000	Rural area	More accurate	More Positive	Less frequent	Yes	No	Yes	Yes	No	No	Agree	Agree	Agree	Agree	Agree	Agree	Yes	Yes	Sometimes	Yes	No	Yes	Yes
603	Male	21-30	Bachelor	Single	Student	Nuclear	<5	<20,000	Urban area	Less accurate	More Positive	Less frequent	Yes	Don't know	Yes	Yes	Don't know	Don't know	Agree	Undecided	Agree	Agree	Agree	Agree	No	No	Sometimes	Yes	No	Sometimes	Yes
604	Female	12-20	Intermediate (11-12)	Single	Student	Nuclear	<5	>30,000	Rural area	More accurate	More Positive	Less frequent	Yes	Yes	Yes	Yes	No	No	Agree	Agree	Agree	Agree	Agree	Agree	No	No	No	No	No	Yes	No
605	Male	21-30	Highier education (avobe bachelor)	Married	Non-govt. empolyee	Join	≥5	>30,000	Rural area	More accurate	More Positive	Less frequent	Yes	Yes	Yes	Yes	Yes	No	Agree	Agree	Agree	Agree	Agree	Agree	No	No	No	Yes	No	Yes	Yes
606	Male	21-30	Bachelor	Single	Student	Nuclear	≥5	<20,000	Urban area	More accurate	More Positive	Less frequent	Yes	No	Yes	Yes	No	No	Agree	Agree	Agree	Agree	Agree	Agree	Yes	Sometimes	Sometimes	Yes	No	Yes	Yes
607	Male	21-30	Highier education (avobe bachelor)	Single	Non-govt. empolyee	Nuclear	≥5	<20,000	Urban area	More accurate	More Positive	Less frequent	Yes	Yes	Yes	Yes	No	No	Agree	Agree	Agree	Agree	Agree	Agree	Yes	Sometimes	Yes	Sometimes	Yes	Sometimes	Yes
608	Male	21-30	Highier education (avobe bachelor)	Single	Non-govt. empolyee	Nuclear	≥5	<20,000	Urban area	More accurate	More Positive	Less frequent	Yes	Yes	Yes	Yes	No	No	Agree	Agree	Agree	Agree	Agree	Agree	Yes	Sometimes	Yes	Sometimes	Yes	Sometimes	Yes
609	Male	21-30	Bachelor	Single	Student	Nuclear	<5	<20,000	Urban area	More accurate	More Positive	Less frequent	Yes	No	Yes	Yes	No	No	Agree	Agree	Agree	Agree	Agree	Agree	Sometimes	Sometimes	Sometimes	No	Yes	Yes	Yes
610	Male	21-30	Highier education (avobe bachelor)	Single	Student	Nuclear	≥5	<20,000	Urban area	More accurate	More Positive	Less frequent	Yes	No	Yes	Yes	No	No	Agree	Agree	Agree	Agree	Agree	Agree	Yes	Sometimes	Yes	Yes	No	Yes	Sometimes
611	Female	21-30	Bachelor	Single	Student	Nuclear	<5	<20,000	Rural area	More accurate	More Positive	Less frequent	Yes	No	Yes	Yes	Yes	No	Agree	Agree	Agree	Agree	Agree	Agree	Sometimes	Sometimes	Sometimes	Yes	No	Sometimes	Yes
612	Female	12-20	Bachelor	Single	Student	Nuclear	≥5	<20,000	Rural area	Less accurate	More Positive	Less frequent	Yes	Yes	Yes	Yes	Don't know	Don't know	Agree	Agree	Agree	Agree	Agree	Agree	Yes	Sometimes	Sometimes	Yes	No	Yes	Yes
613	Female	12-20	Bachelor	Single	Student	Nuclear	<5	<20,000	Urban area	More accurate	More Positive	Less frequent	Yes	No	Yes	Yes	Yes	No	Agree	Agree	Agree	Agree	Agree	Agree	Yes	Sometimes	Yes	Yes	No	Yes	Sometimes
614	Male	>30	Highier education (avobe bachelor)	Married	Non-govt. empolyee	Nuclear	<5	<20,000	Rural area	More accurate	More Positive	Less frequent	Yes	No	Yes	Yes	Yes	No	Agree	Agree	Agree	Agree	Agree	Agree	Sometimes	Sometimes	Sometimes	Sometimes	No	No	No
615	Male	21-30	Bachelor	Single	Student	Join	≥5	<20,000	Urban area	More accurate	More Positive	Less frequent	Yes	Yes	Yes	Yes	Don't know	No	Agree	Agree	Agree	Agree	Undecided	Agree	Yes	Sometimes	No	Yes	Yes	Yes	Yes
616	Male	12-20	Bachelor	Single	Student	Join	≥5	<20,000	Rural area	More accurate	More Positive	Less frequent	Yes	Yes	Yes	Yes	Yes	No	Agree	Agree	Agree	Agree	Agree	Agree	Sometimes	Sometimes	No	Yes	No	Yes	Yes
617	Male	>30	Highier education (avobe bachelor)	Married	Businessman	Join	<5	<20,000	Rural area	More accurate	More Positive	Less frequent	Yes	Yes	Yes	Yes	Yes	No	Agree	Agree	Agree	Agree	Undecided	Agree	No	Sometimes	Sometimes	Sometimes	Yes	Sometimes	Sometimes
618	Male	21-30	Bachelor	Single	Student	Nuclear	<5	20,000-30,000	Rural area	Less accurate	More Positive	Less frequent	Yes	Yes	Yes	Yes	Don't know	Don't know	Agree	Agree	Agree	Agree	Undecided	Agree	No	Sometimes	Sometimes	Yes	No	Sometimes	Yes
619	Male	12-20	Intermediate (11-12)	Single	Student	Nuclear	<5	20,000-30,000	Urban area	More accurate	More Positive	Less frequent	Yes	No	Yes	Yes	No	No	Agree	Agree	Agree	Agree	Agree	Agree	Sometimes	Sometimes	Yes	Yes	No	Yes	Sometimes
620	Female	12-20	Intermediate (11-12)	Single	Student	Nuclear	<5	20,000-30,000	Rural area	More accurate	More Positive	Less frequent	Yes	Don't know	Yes	Yes	Yes	Don't know	Agree	Agree	Agree	Agree	Undecided	Agree	Sometimes	Sometimes	No	Yes	No	No	No
621	Male	21-30	Highier education (avobe bachelor)	Single	Student	Join	≥5	20,000-30,000	Rural area	More accurate	More Positive	Less frequent	Yes	Yes	Yes	Yes	No	No	Agree	Agree	Agree	Agree	Agree	Agree	Yes	Sometimes	Yes	Yes	No	Yes	Yes
622	Male	21-30	Highier education (avobe bachelor)	Single	Non-govt. empolyee	Join	≥5	20,000-30,000	Rural area	More accurate	More Positive	Less frequent	Yes	Yes	Yes	Yes	No	No	Agree	Agree	Agree	Agree	Agree	Agree	Sometimes	Sometimes	Sometimes	Sometimes	Yes	Yes	Yes
623	Male	21-30	Bachelor	Single	Student	Nuclear	<5	>30,000	Rural area	More accurate	More Positive	Less frequent	Yes	Yes	Yes	Yes	Don't know	No	Agree	Agree	Agree	Agree	Agree	Agree	Sometimes	Sometimes	Sometimes	Yes	Yes	Yes	Yes
624	Male	21-30	Bachelor	Single	Non-govt. empolyee	Nuclear	<5	>30,000	Rural area	More accurate	More Positive	Less frequent	Yes	Yes	Yes	Yes	No	No	Agree	Agree	Agree	Agree	Agree	Agree	Sometimes	Sometimes	Sometimes	Yes	No	Yes	Yes
625	Male	12-20	Intermediate (11-12)	Single	Student	Nuclear	≥5	>30,000	Rural area	More accurate	More Positive	Less frequent	Yes	Yes	Yes	Yes	Yes	Don't know	Agree	Agree	Agree	Agree	Undecided	Agree	Sometimes	Sometimes	Sometimes	Yes	No	Yes	Yes
626	Female	12-20	Intermediate (11-12)	Single	Student	Nuclear	≥5	>30,000	Urban area	More accurate	More Positive	Less frequent	Yes	No	Yes	Yes	No	No	Agree	Agree	Agree	Agree	Agree	Agree	Sometimes	Sometimes	Sometimes	Yes	No	Sometimes	Yes
627	Female	12-20	Bachelor	Single	Student	Nuclear	<5	>30,000	Rural area	More accurate	More Positive	Less frequent	Yes	Yes	Yes	Yes	No	No	Agree	Agree	Agree	Agree	Agree	Agree	Sometimes	Sometimes	No	Yes	No	Yes	Yes
628	Female	12-20	Intermediate (11-12)	Single	Student	Nuclear	<5	>30,000	Rural area	More accurate	More Positive	Less frequent	Yes	No	Yes	Yes	No	No	Agree	Agree	Agree	Agree	Agree	Agree	Sometimes	Sometimes	Sometimes	Yes	No	Yes	Yes
629	Female	12-20	Bachelor	Single	Student	Nuclear	<5	>30,000	Rural area	More accurate	More Positive	Less frequent	Yes	No	Yes	Yes	Don't know	No	Agree	Agree	Agree	Agree	Undecided	Agree	Yes	Sometimes	Yes	Yes	No	Yes	Yes
630	Female	21-30	Highier education (avobe bachelor)	Single	Non-govt. empolyee	Nuclear	<5	>30,000	Rural area	More accurate	More Positive	Less frequent	Yes	No	Yes	Yes	No	No	Agree	Agree	Agree	Agree	Agree	Agree	Yes	Sometimes	Yes	Yes	No	Yes	Yes
631	Male	>30	Highier education (avobe bachelor)	Married	Businessman	Nuclear	<5	>30,000	Urban area	More accurate	More Positive	Less frequent	Yes	Yes	Yes	Yes	No	No	Agree	Agree	Agree	Agree	Agree	Agree	Sometimes	Sometimes	Yes	Yes	No	Yes	Yes
632	Male	21-30	Highier education (avobe bachelor)	Single	Non-govt. empolyee	Join	≥5	>30,000	Rural area	More accurate	More Positive	Less frequent	Yes	Yes	Yes	Yes	No	No	Agree	Agree	Agree	Agree	Agree	Agree	Sometimes	Sometimes	No	Yes	No	Sometimes	Sometimes
633	Male	12-20	Bachelor	Single	Student	Join	≥5	>30,000	Rural area	More accurate	More Positive	Less frequent	Yes	No	Yes	Yes	No	No	Agree	Agree	Agree	Agree	Agree	Agree	Sometimes	Sometimes	No	Yes	No	Yes	Yes
634	Female	21-30	Highier education (avobe bachelor)	Single	Non-govt. empolyee	Join	≥5	>30,000	Urban area	More accurate	More Positive	Less frequent	Yes	Yes	Yes	Yes	No	No	Agree	Agree	Agree	Agree	Undecided	Agree	Yes	Sometimes	Yes	Yes	Yes	Yes	Sometimes
635	Female	21-30	Highier education (avobe bachelor)	Single	Non-govt. empolyee	Join	≥5	>30,000	Rural area	More accurate	More Positive	Less frequent	Yes	Yes	Yes	Yes	No	No	Agree	Agree	Agree	Agree	Agree	Agree	Yes	Sometimes	Sometimes	Yes	No	Yes	Yes
636	Male	>30	Highier education (avobe bachelor)	Married	Govt. employee	Join	≥5	>30,000	Urban area	More accurate	More Positive	Less frequent	Yes	No	Yes	Yes	Don't know	No	Agree	Agree	Agree	Agree	Agree	Agree	Sometimes	Sometimes	Sometimes	Yes	No	Sometimes	No
637	Male	21-30	Bachelor	Single	Student	Nuclear	<5	<20,000	Urban area	Less accurate	More Positive	More frequent	Yes	Don't know	Yes	Yes	Don't know	Don't know	Agree	Agree	Agree	Agree	Agree	Agree	Yes	Yes	Yes	Yes	No	Yes	Yes
638	Male	12-20	Bachelor	Single	Student	Nuclear	<5	<20,000	Urban area	More accurate	More Positive	More frequent	Yes	No	Yes	Yes	Don't know	Yes	Agree	Agree	Agree	Agree	Agree	Agree	Yes	Yes	Sometimes	Yes	Yes	Yes	Yes
639	Male	12-20	Intermediate (11-12)	Single	Student	Nuclear	≥5	<20,000	Rural area	More accurate	More Positive	More frequent	Yes	Yes	Yes	Yes	Yes	Yes	Agree	Agree	Agree	Agree	Agree	Agree	Yes	Yes	Yes	Yes	Yes	Yes	Yes
640	Male	12-20	Intermediate (11-12)	Single	Student	Nuclear	<5	<20,000	Rural area	More accurate	More Positive	More frequent	Yes	Yes	Yes	Yes	Yes	Yes	Agree	Agree	Agree	Agree	Agree	Agree	Yes	Yes	Yes	Yes	Yes	Yes	Yes
641	Male	21-30	Intermediate (11-12)	Single	Non-govt. empolyee	Nuclear	<5	<20,000	Rural area	More accurate	More Positive	More frequent	Yes	Yes	Yes	Yes	Yes	No	Agree	Agree	Agree	Agree	Agree	Agree	Yes	Yes	Yes	Yes	Yes	Yes	Yes
642	Male	12-20	Bachelor	Single	Student	Nuclear	<5	<20,000	Urban area	More accurate	More Positive	More frequent	Yes	Yes	Yes	Yes	No	No	Agree	Agree	Agree	Agree	Agree	Agree	Yes	Yes	Yes	Yes	No	Yes	Yes
643	Male	12-20	Bachelor	Single	Student	Nuclear	≥5	<20,000	Urban area	More accurate	More Positive	More frequent	Yes	Yes	Yes	Yes	No	No	Agree	Agree	Agree	Agree	Agree	Agree	Yes	Yes	Yes	Yes	No	Yes	Yes
644	Male	21-30	Bachelor	Single	Student	Nuclear	<5	<20,000	Rural area	More accurate	More Positive	More frequent	Yes	Yes	Yes	Yes	Don't know	No	Agree	Agree	Agree	Agree	Agree	Agree	Yes	Yes	Yes	Yes	No	Yes	Yes
645	Male	12-20	Bachelor	Single	Student	Nuclear	<5	<20,000	Urban area	More accurate	More Positive	More frequent	Yes	No	Yes	Yes	Yes	No	Agree	Agree	Agree	Agree	Agree	Agree	Yes	Yes	Yes	Yes	Yes	Yes	Yes
646	Male	12-20	Bachelor	Single	Student	Nuclear	<5	<20,000	Urban area	More accurate	More Positive	More frequent	No	No	Yes	Yes	Yes	No	Agree	Agree	Agree	Agree	Agree	Agree	Yes	Yes	Yes	Yes	No	Yes	Yes
647	Male	21-30	Bachelor	Single	Student	Nuclear	<5	<20,000	Urban area	More accurate	More Positive	More frequent	Yes	Yes	Yes	Yes	Yes	No	Agree	Agree	Agree	Agree	Agree	Agree	Yes	Yes	Yes	Yes	Yes	Yes	Yes
648	Male	21-30	Bachelor	Single	Student	Nuclear	<5	<20,000	Rural area	More accurate	More Positive	More frequent	Yes	No	Yes	Yes	No	No	Agree	Agree	Agree	Agree	Agree	Agree	Yes	Yes	Yes	Yes	No	Yes	Yes
649	Male	21-30	Bachelor	Single	Student	Nuclear	<5	<20,000	Rural area	More accurate	More Positive	More frequent	Yes	Yes	Yes	Yes	Yes	No	Agree	Agree	Agree	Agree	Agree	Agree	Yes	Yes	Yes	No	Yes	Yes	Yes
650	Male	21-30	Bachelor	Single	Student	Nuclear	<5	<20,000	Urban area	Less accurate	More Positive	More frequent	Yes	Yes	Yes	Yes	Don't know	Yes	Agree	Agree	Agree	Agree	Agree	Agree	Yes	Yes	Yes	Yes	No	Yes	Yes
651	Male	12-20	Bachelor	Single	Student	Nuclear	<5	<20,000	Urban area	More accurate	More Positive	More frequent	Yes	No	Yes	Yes	Yes	No	Agree	Agree	Agree	Agree	Agree	Agree	Yes	Yes	Yes	Yes	No	Yes	Yes
652	Male	12-20	Bachelor	Single	Student	Nuclear	<5	<20,000	Urban area	More accurate	More Positive	More frequent	Yes	No	Yes	Yes	Don't know	No	Agree	Agree	Agree	Agree	Agree	Agree	Yes	Yes	Yes	Yes	Yes	Yes	Yes
653	Male	21-30	Highier education (avobe bachelor)	Single	Student	Nuclear	<5	<20,000	Urban area	More accurate	More Positive	More frequent	Yes	Yes	Yes	Yes	No	No	Agree	Agree	Agree	Agree	Agree	Agree	Yes	Yes	Yes	Yes	Yes	Yes	Yes
654	Male	12-20	Bachelor	Single	Student	Nuclear	<5	<20,000	Urban area	Less accurate	More Positive	More frequent	Yes	Yes	Yes	Yes	No	Yes	Agree	Agree	Agree	Agree	Agree	Agree	Yes	Yes	Yes	Yes	Yes	Yes	Yes
655	Male	21-30	Bachelor	Single	Student	Nuclear	<5	<20,000	Urban area	More accurate	More Positive	More frequent	Yes	No	Yes	Yes	No	No	Agree	Agree	Agree	Agree	Agree	Agree	Yes	Yes	Yes	Yes	Yes	Yes	Yes
656	Male	21-30	Highier education (avobe bachelor)	Single	Student	Nuclear	<5	<20,000	Urban area	More accurate	More Positive	More frequent	Yes	Yes	Yes	Yes	No	No	Agree	Agree	Agree	Agree	Agree	Agree	Yes	Yes	Yes	Yes	No	Yes	Yes
657	Male	21-30	Highier education (avobe bachelor)	Single	Student	Nuclear	<5	<20,000	Rural area	More accurate	More Positive	More frequent	Yes	Yes	Yes	Yes	Yes	Yes	Agree	Agree	Agree	Agree	Agree	Agree	Yes	Yes	Yes	Yes	Yes	Yes	Yes
658	Male	21-30	Bachelor	Single	Student	Nuclear	<5	<20,000	Urban area	Less accurate	More Positive	More frequent	Yes	Yes	Yes	Yes	Don't know	Don't know	Agree	Agree	Agree	Agree	Agree	Agree	Yes	Yes	Yes	Yes	No	Yes	Yes
659	Male	12-20	Bachelor	Single	Student	Nuclear	<5	<20,000	Urban area	More accurate	More Positive	More frequent	Yes	No	Yes	Yes	Yes	No	Agree	Agree	Agree	Agree	Agree	Agree	Yes	Yes	Yes	Yes	No	Yes	Yes
660	Male	21-30	Bachelor	Single	Non-govt. empolyee	Nuclear	≥5	<20,000	Urban area	More accurate	More Positive	More frequent	Yes	No	Yes	Yes	No	No	Agree	Agree	Agree	Agree	Agree	Agree	Yes	Yes	Yes	Yes	No	Yes	Yes
661	Male	12-20	Bachelor	Single	Student	Nuclear	<5	<20,000	Urban area	More accurate	More Positive	More frequent	Yes	No	Yes	Yes	No	No	Agree	Agree	Agree	Agree	Agree	Agree	Yes	Yes	Yes	Yes	No	Yes	Yes
662	Male	12-20	Intermediate (11-12)	Single	Student	Nuclear	<5	<20,000	Urban area	More accurate	More Positive	More frequent	Yes	No	Yes	Yes	Yes	No	Agree	Agree	Agree	Agree	Agree	Agree	Yes	Yes	Yes	Yes	Yes	Yes	No
663	Male	21-30	Bachelor	Single	Student	Nuclear	<5	<20,000	Urban area	More accurate	More Positive	More frequent	Yes	No	Yes	Yes	No	No	Agree	Agree	Agree	Agree	Agree	Agree	Yes	Yes	Sometimes	Yes	Yes	Yes	Yes
664	Male	21-30	Bachelor	Single	Non-govt. empolyee	Nuclear	<5	<20,000	Rural area	More accurate	More Positive	More frequent	Yes	Yes	Yes	Yes	Yes	Don't know	Agree	Agree	Agree	Agree	Agree	Agree	Yes	Yes	Sometimes	Yes	Yes	Yes	Yes
665	Male	12-20	Bachelor	Single	Student	Nuclear	<5	<20,000	Urban area	More accurate	More Positive	More frequent	Yes	No	Yes	Yes	No	No	Agree	Agree	Agree	Agree	Agree	Agree	Sometimes	Yes	Yes	Yes	Yes	Yes	Yes
666	Male	21-30	Bachelor	Single	Student	Nuclear	<5	<20,000	Rural area	More accurate	More Positive	More frequent	Yes	No	Yes	Yes	No	No	Agree	Agree	Agree	Agree	Agree	Agree	Yes	Yes	Yes	Yes	No	Yes	Yes
667	Male	21-30	Highier education (avobe bachelor)	Single	Student	Nuclear	<5	<20,000	Rural area	More accurate	More Positive	More frequent	Yes	Don't know	Yes	Yes	No	No	Agree	Agree	Agree	Agree	Agree	Agree	Yes	Yes	Yes	Yes	No	Yes	Yes
668	Male	21-30	Highier education (avobe bachelor)	Single	Student	Nuclear	≥5	<20,000	Rural area	More accurate	More Positive	More frequent	Yes	No	Yes	Yes	No	No	Agree	Agree	Agree	Agree	Agree	Agree	Yes	Yes	Yes	Yes	Yes	Yes	Yes
669	Male	12-20	Intermediate (11-12)	Single	Student	Nuclear	<5	<20,000	Urban area	More accurate	More Positive	More frequent	Yes	Yes	Yes	Yes	Don't know	No	Agree	Agree	Agree	Agree	Agree	Agree	Yes	Yes	Yes	Yes	Yes	Yes	Yes
670	Male	12-20	Intermediate (11-12)	Single	Student	Nuclear	<5	<20,000	Urban area	More accurate	More Positive	More frequent	Yes	Yes	Yes	Yes	No	No	Agree	Agree	Agree	Agree	Agree	Agree	Yes	Yes	Yes	Yes	Yes	Yes	Yes
671	Male	21-30	Highier education (avobe bachelor)	Single	Student	Nuclear	<5	<20,000	Rural area	More accurate	More Positive	More frequent	Yes	No	Yes	Yes	Don't know	Don't know	Agree	Agree	Agree	Agree	Agree	Agree	Yes	Yes	Yes	Yes	Yes	Yes	Yes
672	Male	21-30	Bachelor	Single	Student	Nuclear	<5	<20,000	Rural area	More accurate	More Positive	More frequent	Yes	Yes	Yes	Yes	No	No	Agree	Agree	Agree	Agree	Agree	Agree	Yes	Yes	Yes	Yes	No	Yes	Yes
673	Male	>30	Highier education (avobe bachelor)	Single	Student	Nuclear	<5	<20,000	Rural area	More accurate	More Positive	More frequent	Yes	Yes	Yes	Yes	Yes	Don't know	Agree	Agree	Agree	Agree	Agree	Agree	Yes	Yes	Yes	Yes	Yes	Yes	Yes
674	Male	21-30	Bachelor	Single	Student	Nuclear	<5	<20,000	Rural area	More accurate	More Positive	More frequent	Yes	Yes	Yes	Yes	No	No	Agree	Agree	Agree	Agree	Undecided	Agree	Yes	Yes	Yes	Yes	Yes	Yes	Yes
675	Female	12-20	Bachelor	Single	Student	Nuclear	<5	<20,000	Rural area	More accurate	More Positive	More frequent	Yes	Yes	Yes	Yes	Yes	No	Agree	Agree	Agree	Agree	Agree	Agree	Yes	Yes	Yes	Yes	Yes	Yes	Yes
676	Female	21-30	Bachelor	Single	Student	Nuclear	<5	<20,000	Rural area	More accurate	More Positive	More frequent	Yes	No	Yes	Yes	Yes	No	Agree	Agree	Agree	Agree	Agree	Agree	Yes	Yes	Yes	Yes	No	Yes	Yes
677	Female	12-20	Bachelor	Single	Student	Nuclear	<5	<20,000	Urban area	More accurate	More Positive	More frequent	Yes	No	Yes	Yes	No	No	Agree	Agree	Agree	Agree	Agree	Agree	Yes	Yes	Yes	Yes	Yes	Yes	Yes
678	Female	12-20	Bachelor	Single	Student	Nuclear	<5	<20,000	Rural area	More accurate	More Positive	More frequent	Yes	No	Yes	Yes	No	No	Agree	Agree	Agree	Agree	Agree	Agree	Yes	Yes	Yes	Yes	Yes	Yes	Yes
679	Female	21-30	Bachelor	Single	Student	Nuclear	<5	<20,000	Rural area	More accurate	More Positive	More frequent	Yes	Yes	Yes	Yes	Yes	No	Agree	Agree	Agree	Agree	Undecided	Agree	Yes	Yes	Yes	Yes	Yes	Yes	Yes
680	Female	12-20	Bachelor	Single	Student	Nuclear	<5	<20,000	Rural area	More accurate	More Positive	More frequent	Yes	No	Yes	Yes	Don't know	No	Agree	Agree	Agree	Agree	Agree	Agree	Yes	Yes	Yes	Yes	No	Yes	Yes
681	Female	12-20	Bachelor	Single	Student	Nuclear	<5	<20,000	Rural area	More accurate	More Positive	More frequent	Yes	Yes	Yes	Yes	No	No	Agree	Agree	Agree	Agree	Agree	Agree	Yes	Yes	Yes	Yes	No	Yes	Yes
682	Female	12-20	Bachelor	Single	Student	Nuclear	<5	<20,000	Rural area	More accurate	More Positive	More frequent	Yes	Yes	Yes	Yes	No	No	Agree	Agree	Agree	Agree	Agree	Agree	Yes	Yes	Yes	Yes	No	Yes	Yes
683	Female	12-20	Bachelor	Single	Student	Nuclear	<5	<20,000	Urban area	More accurate	More Positive	More frequent	Yes	No	Yes	Yes	Don't know	No	Agree	Agree	Agree	Agree	Undecided	Agree	Yes	Yes	Yes	Yes	No	Yes	Yes
684	Female	21-30	Bachelor	Single	Student	Nuclear	<5	<20,000	Rural area	More accurate	More Positive	More frequent	Yes	Yes	Yes	Yes	Don't know	No	Agree	Agree	Agree	Agree	Agree	Agree	Yes	Yes	Sometimes	Yes	Yes	Yes	Yes
685	Female	>30	Highier education (avobe bachelor)	Single	Student	Nuclear	<5	<20,000	Rural area	More accurate	More Positive	More frequent	Yes	Yes	Yes	Yes	No	No	Agree	Agree	Agree	Agree	Agree	Agree	Yes	Yes	Yes	Yes	Yes	Yes	Yes
686	Female	21-30	Bachelor	Single	Student	Nuclear	<5	<20,000	Rural area	More accurate	More Positive	More frequent	Yes	No	Yes	Yes	Don't know	No	Agree	Agree	Agree	Agree	Undecided	Agree	Yes	Yes	Yes	Yes	No	Yes	Yes
687	Female	21-30	Bachelor	Single	Student	Nuclear	≥5	<20,000	Urban area	More accurate	More Positive	More frequent	Yes	No	Yes	Yes	No	No	Agree	Agree	Agree	Agree	Agree	Agree	Yes	Yes	Yes	Yes	Yes	Yes	Yes
688	Female	21-30	Highier education (avobe bachelor)	Single	Non-govt. empolyee	Nuclear	<5	<20,000	Rural area	More accurate	More Positive	More frequent	Yes	Yes	Yes	Yes	Don't know	No	Agree	Agree	Agree	Undecided	Agree	Agree	Yes	Yes	Yes	Yes	Yes	Yes	Yes
689	Female	12-20	Bachelor	Single	Student	Nuclear	<5	<20,000	Rural area	More accurate	More Positive	More frequent	Yes	No	Yes	Yes	Don't know	No	Agree	Agree	Agree	Agree	Undecided	Agree	Yes	Yes	Yes	Yes	Yes	Yes	Yes
690	Female	21-30	Highier education (avobe bachelor)	Single	Non-govt. empolyee	Nuclear	<5	<20,000	Rural area	More accurate	More Positive	More frequent	Yes	Yes	Yes	Yes	No	No	Agree	Agree	Agree	Agree	Agree	Agree	Yes	Yes	Yes	Yes	Yes	Yes	Yes
691	Female	21-30	Highier education (avobe bachelor)	Single	Unemployment	Nuclear	<5	<20,000	Rural area	More accurate	More Positive	More frequent	Yes	No	Yes	Yes	No	No	Agree	Agree	Agree	Agree	Agree	Agree	Yes	Yes	Yes	Yes	No	Yes	Yes
692	Female	21-30	Bachelor	Single	Student	Nuclear	<5	<20,000	Urban area	More accurate	More Positive	More frequent	Yes	No	Yes	Yes	Yes	No	Agree	Agree	Agree	Agree	Agree	Agree	Yes	Yes	Yes	Yes	Yes	Yes	Yes
693	Female	21-30	Bachelor	Single	Student	Nuclear	<5	<20,000	Urban area	More accurate	More Positive	More frequent	Yes	No	Yes	Yes	Yes	No	Agree	Agree	Agree	Agree	Agree	Agree	Yes	Yes	Yes	Yes	Yes	Yes	Yes
694	Female	21-30	Highier education (avobe bachelor)	Single	Non-govt. empolyee	Nuclear	<5	<20,000	Rural area	More accurate	More Positive	More frequent	Yes	Yes	Yes	Yes	Don't know	No	Agree	Agree	Agree	Agree	Agree	Agree	Yes	Yes	Sometimes	Yes	Yes	Yes	Yes
695	Female	21-30	Bachelor	Single	Student	Nuclear	<5	<20,000	Rural area	More accurate	More Positive	More frequent	Yes	No	Yes	Yes	Yes	No	Agree	Agree	Agree	Agree	Undecided	Agree	Sometimes	Yes	Yes	Yes	Yes	Yes	Yes
696	Female	12-20	Intermediate (11-12)	Single	Student	Nuclear	<5	<20,000	Rural area	More accurate	More Positive	More frequent	Yes	No	Yes	Yes	No	No	Agree	Agree	Agree	Agree	Agree	Agree	Yes	Yes	Yes	Yes	No	Yes	Yes
697	Male	21-30	Highier education (avobe bachelor)	Married	Businessman	Nuclear	≥5	<20,000	Rural area	More accurate	More Positive	More frequent	Yes	Yes	Yes	Yes	No	No	Agree	Agree	Agree	Agree	Agree	Agree	Yes	Yes	Yes	Yes	No	Yes	Yes
698	Female	21-30	Bachelor	Married	Housewife	Nuclear	<5	<20,000	Rural area	More accurate	More Positive	More frequent	Yes	Yes	Yes	Yes	Don't know	No	Agree	Agree	Agree	Agree	Agree	Undecided	Yes	Yes	Yes	Yes	No	Yes	Yes
699	Female	>30	Highier education (avobe bachelor)	Married	Non-govt. empolyee	Nuclear	<5	<20,000	Rural area	More accurate	More Positive	More frequent	Yes	No	Yes	Yes	Yes	No	Agree	Agree	Agree	Agree	Agree	Agree	Yes	Yes	Yes	Yes	Yes	Yes	Yes
700	Male	>30	Bachelor	Divorced	Housewife	Nuclear	≥5	<20,000	Urban area	More accurate	More Positive	More frequent	Yes	Yes	Yes	Yes	Yes	Yes	Agree	Agree	Agree	Agree	Agree	Agree	Yes	Yes	Yes	Yes	Yes	Yes	Yes
701	Male	21-30	Bachelor	Single	Student	Join	<5	<20,000	Urban area	More accurate	More Positive	More frequent	Yes	Yes	Yes	Yes	Don't know	No	Agree	Agree	Agree	Agree	Agree	Agree	Yes	Yes	Yes	Yes	No	Yes	Yes
702	Male	21-30	Bachelor	Single	Student	Join	≥5	<20,000	Rural area	More accurate	More Positive	More frequent	Yes	Yes	Yes	Yes	No	No	Agree	Agree	Agree	Agree	Agree	Agree	Yes	Yes	Yes	Yes	Yes	Sometimes	Yes
703	Male	12-20	Bachelor	Single	Student	Join	<5	<20,000	Urban area	Less accurate	More Positive	More frequent	Yes	Don't know	Yes	Yes	Don't know	Don't know	Agree	Agree	Agree	Undecided	Agree	Agree	Yes	Yes	Yes	Yes	Yes	Yes	Yes
704	Male	21-30	Bachelor	Single	Student	Join	≥5	<20,000	Urban area	More accurate	More Positive	More frequent	Yes	No	Yes	Yes	Yes	No	Agree	Agree	Agree	Agree	Agree	Agree	Yes	Yes	Yes	Yes	No	Yes	Yes
705	Male	21-30	Intermediate (11-12)	Single	Businessman	Join	≥5	<20,000	Rural area	More accurate	More Positive	More frequent	Yes	Don't know	Yes	Yes	No	No	Agree	Agree	Agree	Agree	Agree	Agree	Yes	Yes	Yes	Yes	Yes	Yes	Yes
706	Male	21-30	Highier education (avobe bachelor)	Single	Student	Join	≥5	<20,000	Rural area	More accurate	More Positive	More frequent	Yes	No	Yes	Yes	Yes	No	Agree	Agree	Agree	Agree	Agree	Agree	Yes	Yes	Yes	Yes	No	Yes	Yes
707	Male	21-30	Highier education (avobe bachelor)	Single	Govt. employee	Join	<5	<20,000	Urban area	More accurate	More Positive	More frequent	Yes	Yes	Yes	Yes	No	No	Agree	Agree	Agree	Agree	Agree	Agree	Yes	Yes	Yes	Yes	Yes	Yes	Yes
708	Male	12-20	Bachelor	Single	Student	Join	≥5	<20,000	Urban area	More accurate	More Positive	More frequent	Yes	Yes	Yes	Yes	No	No	Agree	Agree	Agree	Agree	Undecided	Agree	Yes	Yes	Yes	Sometimes	Yes	Yes	Yes
709	Male	21-30	Highier education (avobe bachelor)	Single	Student	Join	≥5	<20,000	Urban area	More accurate	More Positive	More frequent	Yes	No	Yes	Yes	No	No	Agree	Agree	Agree	Agree	Agree	Agree	Yes	Yes	Yes	Yes	Yes	Yes	Yes
710	Male	12-20	Intermediate (11-12)	Single	Student	Join	≥5	<20,000	Urban area	More accurate	More Positive	More frequent	Yes	No	Yes	Yes	Yes	No	Agree	Agree	Agree	Agree	Undecided	Agree	Yes	Yes	Yes	Yes	No	Yes	Yes
711	Male	21-30	Highier education (avobe bachelor)	Single	Student	Join	<5	<20,000	Urban area	More accurate	More Positive	More frequent	Yes	No	Yes	Yes	Yes	No	Agree	Agree	Agree	Agree	Agree	Agree	Yes	Yes	Yes	Yes	Yes	Yes	Yes
712	Male	21-30	Highier education (avobe bachelor)	Single	Student	Join	≥5	<20,000	Urban area	More accurate	More Positive	More frequent	Yes	No	Yes	Yes	No	No	Agree	Agree	Agree	Agree	Agree	Agree	Yes	Yes	Yes	Yes	Yes	Yes	Yes
713	Male	21-30	Highier education (avobe bachelor)	Single	Non-govt. empolyee	Join	≥5	<20,000	Urban area	More accurate	More Positive	More frequent	Yes	Yes	Yes	Yes	Don't know	No	Agree	Agree	Agree	Agree	Agree	Agree	Yes	Yes	Yes	Yes	No	Yes	Yes
714	Female	12-20	Bachelor	Single	Student	Join	<5	<20,000	Urban area	More accurate	More Positive	More frequent	Yes	No	Yes	Yes	Don't know	No	Agree	Agree	Agree	Agree	Undecided	Agree	Yes	Yes	Yes	Yes	No	Yes	Yes
715	Female	21-30	Bachelor	Single	Student	Join	≥5	<20,000	Urban area	More accurate	More Positive	More frequent	Yes	Yes	Yes	Yes	Yes	Yes	Agree	Agree	Agree	Agree	Agree	Agree	Yes	Yes	Yes	Yes	No	Yes	Yes
716	Male	>30	Highier education (avobe bachelor)	Married	Non-govt. empolyee	Join	≥5	<20,000	Rural area	More accurate	More Positive	More frequent	Yes	No	Yes	Yes	No	No	Agree	Agree	Agree	Agree	Agree	Agree	Yes	Yes	Sometimes	Yes	Yes	Yes	Yes
717	Male	12-20	Bachelor	Married	Student	Join	≥5	<20,000	Rural area	More accurate	More Positive	More frequent	Yes	Yes	Yes	Yes	No	No	Agree	Agree	Agree	Agree	Agree	Agree	Yes	Yes	Yes	Yes	No	Yes	Yes
718	Female	21-30	Bachelor	Married	Student	Join	<5	<20,000	Urban area	More accurate	More Positive	More frequent	Yes	Yes	Yes	Yes	Yes	Yes	Agree	Agree	Agree	Agree	Agree	Agree	Yes	Yes	Yes	Yes	No	Yes	Yes
719	Male	12-20	Bachelor	Single	Student	Nuclear	<5	20,000-30,000	Rural area	More accurate	More Positive	More frequent	Yes	Don't know	Yes	Yes	Yes	No	Agree	Agree	Agree	Agree	Agree	Agree	Yes	Yes	Yes	Yes	No	Yes	Yes
720	Male	21-30	Bachelor	Single	Student	Nuclear	<5	20,000-30,000	Rural area	More accurate	More Positive	More frequent	Yes	No	Yes	Yes	Yes	No	Agree	Agree	Agree	Agree	Undecided	Agree	Yes	Yes	Yes	Yes	No	Yes	Yes
721	Male	21-30	Bachelor	Single	Student	Nuclear	<5	20,000-30,000	Urban area	More accurate	More Positive	More frequent	Yes	Yes	Yes	Yes	No	No	Agree	Agree	Agree	Agree	Undecided	Agree	Yes	Yes	Yes	Yes	No	Yes	Yes
722	Male	21-30	Bachelor	Single	Student	Nuclear	<5	20,000-30,000	Rural area	More accurate	More Positive	More frequent	Yes	No	Yes	Yes	Yes	Don't know	Agree	Agree	Agree	Agree	Agree	Agree	Yes	Yes	Yes	Yes	No	Yes	Yes
723	Male	21-30	Bachelor	Single	Student	Nuclear	≥5	20,000-30,000	Urban area	More accurate	More Positive	More frequent	No	No	Yes	Yes	Yes	No	Agree	Agree	Agree	Agree	Agree	Agree	Yes	Yes	Yes	Yes	Yes	Yes	Yes
724	Male	21-30	Bachelor	Single	Student	Nuclear	<5	20,000-30,000	Rural area	Less accurate	More Positive	More frequent	No	Yes	Yes	Yes	No	No	Agree	Agree	Agree	Agree	Agree	Agree	Yes	Yes	Yes	Yes	Yes	Yes	Yes
725	Male	21-30	Bachelor	Single	Student	Nuclear	<5	20,000-30,000	Rural area	More accurate	More Positive	More frequent	Yes	No	Yes	Yes	Yes	No	Agree	Agree	Agree	Agree	Agree	Agree	Yes	Yes	Yes	Yes	No	Yes	Yes
726	Male	21-30	Highier education (avobe bachelor)	Single	Unemployment	Nuclear	≥5	20,000-30,000	Rural area	More accurate	More Positive	More frequent	Yes	Yes	Yes	Yes	Don't know	No	Agree	Agree	Agree	Agree	Agree	Agree	Yes	Yes	Yes	Yes	Yes	Yes	Yes
727	Male	12-20	Bachelor	Single	Student	Nuclear	<5	20,000-30,000	Urban area	More accurate	More Positive	More frequent	Yes	No	Yes	Yes	Yes	No	Agree	Agree	Agree	Agree	Agree	Agree	Yes	Yes	Yes	No	Yes	Yes	Yes
728	Male	21-30	Bachelor	Single	Student	Nuclear	≥5	20,000-30,000	Rural area	More accurate	More Positive	More frequent	Yes	No	Yes	Yes	No	No	Agree	Agree	Agree	Agree	Agree	Agree	Yes	Yes	Yes	Yes	Yes	Yes	Yes
729	Male	21-30	Intermediate (11-12)	Single	Student	Nuclear	≥5	20,000-30,000	Rural area	More accurate	More Positive	More frequent	Yes	No	Yes	Yes	No	No	Agree	Agree	Agree	Agree	Agree	Agree	Yes	Yes	Yes	Yes	Yes	Yes	Yes
730	Male	12-20	Intermediate (11-12)	Single	Student	Nuclear	<5	20,000-30,000	Urban area	More accurate	More Positive	More frequent	Yes	No	Yes	Yes	Yes	No	Agree	Agree	Agree	Agree	Agree	Agree	Yes	Yes	Yes	Yes	No	Yes	Yes
731	Male	21-30	Bachelor	Single	Student	Nuclear	<5	20,000-30,000	Rural area	More accurate	More Positive	More frequent	Yes	Yes	Yes	Yes	Yes	No	Agree	Agree	Agree	Agree	Agree	Agree	Yes	Yes	Yes	Yes	Yes	Yes	Sometimes
732	Male	12-20	Bachelor	Single	Student	Nuclear	<5	20,000-30,000	Urban area	More accurate	More Positive	More frequent	Yes	Don't know	Yes	Yes	Don't know	No	Agree	Agree	Agree	Agree	Agree	Agree	Yes	Yes	Yes	Yes	Yes	Yes	Yes
733	Male	21-30	Bachelor	Single	Student	Nuclear	<5	20,000-30,000	Rural area	Less accurate	More Positive	More frequent	Yes	Don't know	Yes	Yes	Don't know	Don't know	Agree	Agree	Agree	Agree	Agree	Agree	Yes	Yes	Yes	Yes	Yes	Yes	Yes
734	Male	21-30	Bachelor	Single	Student	Nuclear	<5	20,000-30,000	Rural area	More accurate	More Positive	More frequent	Yes	Yes	Yes	Yes	Yes	No	Agree	Agree	Agree	Agree	Agree	Agree	Yes	Yes	Yes	Sometimes	Yes	Yes	Yes
735	Male	21-30	Bachelor	Single	Student	Nuclear	<5	20,000-30,000	Urban area	Less accurate	More Positive	More frequent	No	Yes	Yes	Yes	No	No	Agree	Agree	Agree	Agree	Agree	Agree	Yes	Yes	Yes	Yes	Yes	Yes	Yes
736	Male	21-30	Bachelor	Single	Student	Nuclear	<5	20,000-30,000	Urban area	More accurate	More Positive	More frequent	Yes	No	Yes	Yes	Yes	No	Agree	Agree	Agree	Undecided	Agree	Agree	Yes	Yes	Sometimes	Yes	Yes	Yes	Yes
737	Male	12-20	Bachelor	Single	Student	Nuclear	<5	20,000-30,000	Urban area	More accurate	More Positive	More frequent	Yes	No	Yes	Yes	No	No	Agree	Agree	Agree	Agree	Agree	Agree	Yes	Yes	Yes	Yes	Yes	Yes	Yes
738	Male	12-20	Bachelor	Single	Student	Nuclear	≥5	20,000-30,000	Urban area	More accurate	More Positive	More frequent	Yes	Don't know	Yes	Yes	Yes	No	Agree	Agree	Agree	Agree	Agree	Agree	Yes	Yes	Yes	Yes	No	Yes	Yes
739	Male	12-20	Bachelor	Single	Student	Nuclear	<5	20,000-30,000	Rural area	More accurate	More Positive	More frequent	Yes	No	Yes	Yes	No	No	Agree	Agree	Agree	Agree	Agree	Agree	Yes	Yes	Yes	Yes	No	Yes	Yes
740	Male	21-30	Bachelor	Single	Student	Nuclear	<5	20,000-30,000	Rural area	More accurate	More Positive	More frequent	Yes	No	Yes	Yes	No	No	Agree	Agree	Agree	Agree	Agree	Agree	Yes	Yes	Yes	Yes	Yes	Yes	Yes
741	Male	12-20	Intermediate (11-12)	Single	Student	Nuclear	<5	20,000-30,000	Rural area	More accurate	More Positive	More frequent	Yes	No	Yes	Yes	Don't know	No	Agree	Agree	Agree	Agree	Agree	Agree	Yes	Yes	Yes	Yes	No	Yes	Yes
742	Male	21-30	Bachelor	Single	Student	Nuclear	≥5	20,000-30,000	Urban area	More accurate	More Positive	More frequent	Yes	No	Yes	Yes	No	No	Agree	Agree	Agree	Agree	Agree	Agree	Yes	Yes	Yes	Yes	No	Yes	Yes
743	Male	21-30	Highier education (avobe bachelor)	Single	Student	Nuclear	<5	20,000-30,000	Rural area	More accurate	More Positive	More frequent	Yes	Yes	Yes	Yes	Don't know	No	Agree	Agree	Agree	Agree	Agree	Agree	Yes	Yes	Yes	Yes	Yes	Yes	Yes
744	Male	21-30	Highier education (avobe bachelor)	Single	Student	Nuclear	<5	20,000-30,000	Urban area	More accurate	More Positive	More frequent	Yes	Yes	Yes	Yes	No	No	Agree	Agree	Agree	Agree	Agree	Agree	Yes	Yes	Yes	Yes	Yes	Yes	Yes
745	Male	21-30	Bachelor	Single	Unemployment	Nuclear	<5	20,000-30,000	Urban area	More accurate	More Positive	More frequent	No	No	Yes	Yes	No	No	Agree	Agree	Agree	Agree	Agree	Agree	Yes	Yes	Sometimes	Yes	Yes	Yes	Yes
746	Male	21-30	Highier education (avobe bachelor)	Single	Student	Nuclear	<5	20,000-30,000	Rural area	More accurate	More Positive	More frequent	Yes	Yes	Yes	Yes	No	No	Agree	Agree	Agree	Agree	Agree	Agree	Yes	Yes	Yes	Yes	Yes	Yes	Yes
747	Male	21-30	Bachelor	Single	Student	Nuclear	<5	20,000-30,000	Rural area	More accurate	More Positive	More frequent	Yes	No	Yes	Yes	Don't know	No	Agree	Agree	Agree	Undecided	Agree	Agree	Yes	Yes	Yes	Yes	No	Yes	Yes
748	Male	12-20	Bachelor	Single	Student	Nuclear	<5	20,000-30,000	Rural area	More accurate	More Positive	More frequent	Yes	No	Yes	Yes	Yes	No	Agree	Agree	Agree	Agree	Agree	Agree	Yes	Yes	Yes	Yes	Yes	Yes	Yes
749	Female	12-20	Bachelor	Single	Student	Nuclear	≥5	20,000-30,000	Rural area	More accurate	More Positive	More frequent	Yes	No	Yes	Yes	Yes	Don't know	Agree	Agree	Agree	Agree	Undecided	Agree	Yes	Yes	Yes	Yes	Yes	Yes	Yes
750	Female	12-20	Intermediate (11-12)	Single	Student	Nuclear	<5	20,000-30,000	Rural area	More accurate	More Positive	More frequent	No	No	Yes	Yes	Don't know	No	Agree	Agree	Agree	Agree	Agree	Agree	Yes	Yes	Yes	Yes	Yes	Yes	Yes
751	Female	21-30	Highier education (avobe bachelor)	Single	Student	Nuclear	≥5	20,000-30,000	Urban area	More accurate	More Positive	More frequent	No	No	Yes	Yes	Yes	No	Agree	Agree	Agree	Agree	Agree	Agree	Yes	Yes	Yes	Yes	No	Yes	Yes
752	Female	21-30	Highier education (avobe bachelor)	Single	Student	Nuclear	<5	20,000-30,000	Rural area	More accurate	More Positive	More frequent	Yes	Yes	Yes	Yes	Don't know	No	Agree	Agree	Agree	Agree	Undecided	Agree	Yes	Yes	Yes	Yes	No	Yes	Yes
753	Female	21-30	Bachelor	Single	Student	Nuclear	≥5	20,000-30,000	Rural area	More accurate	More Positive	More frequent	Yes	No	Yes	Yes	Yes	No	Agree	Agree	Agree	Agree	Agree	Agree	Yes	Yes	Yes	Yes	No	Yes	Yes
754	Female	12-20	Bachelor	Single	Student	Nuclear	<5	20,000-30,000	Rural area	More accurate	More Positive	More frequent	Yes	Yes	Yes	Yes	Yes	No	Agree	Agree	Agree	Agree	Agree	Agree	Yes	Yes	Yes	Yes	No	Yes	Yes
755	Female	12-20	Bachelor	Single	Student	Nuclear	<5	20,000-30,000	Rural area	More accurate	More Positive	More frequent	Yes	Yes	Yes	Yes	Yes	No	Agree	Agree	Agree	Agree	Agree	Agree	Yes	Yes	Yes	Yes	No	Yes	Yes
756	Female	12-20	Bachelor	Single	Student	Nuclear	<5	20,000-30,000	Rural area	More accurate	More Positive	More frequent	Yes	No	Yes	Yes	Yes	No	Agree	Agree	Agree	Agree	Agree	Agree	Yes	Yes	Yes	Yes	Yes	Yes	Yes
757	Female	21-30	Bachelor	Single	Student	Nuclear	<5	20,000-30,000	Urban area	More accurate	More Positive	More frequent	Yes	No	Yes	Yes	Yes	No	Agree	Agree	Agree	Agree	Agree	Agree	Yes	Yes	Yes	Yes	Yes	Yes	Yes
758	Female	12-20	Bachelor	Single	Student	Nuclear	<5	20,000-30,000	Rural area	More accurate	More Positive	More frequent	Yes	Don't know	Yes	Yes	Don't know	No	Agree	Agree	Agree	Agree	Agree	Agree	Yes	Yes	Yes	Yes	No	Yes	Yes
759	Female	21-30	Bachelor	Single	Student	Nuclear	<5	20,000-30,000	Rural area	More accurate	More Positive	More frequent	Yes	Yes	Yes	Yes	No	No	Agree	Agree	Agree	Agree	Agree	Agree	Yes	Yes	Yes	Yes	Yes	Yes	Yes
760	Female	12-20	Bachelor	Single	Student	Nuclear	<5	20,000-30,000	Rural area	More accurate	More Positive	More frequent	Yes	No	Yes	Yes	Don't know	No	Agree	Agree	Agree	Agree	Undecided	Agree	Yes	Yes	Yes	Yes	No	Yes	Yes
761	Female	12-20	Bachelor	Single	Student	Nuclear	≥5	20,000-30,000	Rural area	More accurate	More Positive	More frequent	Yes	Yes	Yes	Yes	No	No	Agree	Agree	Agree	Agree	Agree	Agree	Yes	Yes	Yes	Yes	No	Yes	Yes
762	Female	12-20	Bachelor	Single	Student	Nuclear	<5	20,000-30,000	Rural area	More accurate	More Positive	More frequent	Yes	Don't know	Yes	Yes	Yes	No	Agree	Agree	Agree	Agree	Agree	Agree	Yes	Yes	Sometimes	Yes	Yes	Yes	Yes
763	Female	12-20	Intermediate (11-12)	Single	Student	Nuclear	<5	20,000-30,000	Rural area	More accurate	More Positive	More frequent	Yes	Don't know	Yes	Yes	Yes	No	Agree	Agree	Agree	Agree	Agree	Agree	Yes	Yes	Yes	Yes	Yes	Yes	Yes
764	Female	12-20	Intermediate (11-12)	Single	Student	Nuclear	<5	20,000-30,000	Rural area	More accurate	More Positive	More frequent	Yes	No	Yes	Yes	Yes	No	Agree	Agree	Agree	Agree	Agree	Agree	Yes	Yes	Yes	Yes	Yes	Yes	Yes
765	Female	21-30	Bachelor	Single	Student	Nuclear	<5	20,000-30,000	Urban area	More accurate	More Positive	More frequent	Yes	No	Yes	Yes	Yes	No	Agree	Agree	Agree	Agree	Agree	Agree	Yes	Yes	Yes	Yes	No	Yes	Yes
766	Female	21-30	Bachelor	Single	Student	Nuclear	≥5	20,000-30,000	Urban area	More accurate	More Positive	More frequent	Yes	Yes	Yes	Yes	Yes	No	Agree	Agree	Agree	Agree	Agree	Agree	Yes	Yes	Yes	Yes	Yes	Yes	Yes
767	Female	12-20	Bachelor	Single	Student	Nuclear	<5	20,000-30,000	Rural area	More accurate	More Positive	More frequent	Yes	Yes	Yes	Yes	Yes	No	Agree	Agree	Agree	Agree	Agree	Agree	Yes	Yes	No	Yes	Yes	Yes	Yes
768	Female	12-20	Intermediate (11-12)	Single	Student	Nuclear	<5	20,000-30,000	Rural area	More accurate	More Positive	More frequent	Yes	Yes	Yes	Yes	Don't know	No	Agree	Agree	Agree	Agree	Agree	Agree	Yes	Yes	Yes	Yes	Yes	Yes	Yes
769	Female	21-30	Bachelor	Single	Student	Nuclear	<5	20,000-30,000	Rural area	More accurate	More Positive	More frequent	Yes	No	Yes	Yes	No	No	Agree	Agree	Agree	Agree	Agree	Agree	Yes	Yes	Yes	Yes	No	Yes	Yes
770	Female	21-30	Bachelor	Single	Student	Nuclear	≥5	20,000-30,000	Rural area	More accurate	More Positive	More frequent	Yes	No	Yes	Yes	No	No	Agree	Agree	Agree	Agree	Agree	Agree	Yes	Yes	Yes	Yes	No	Yes	Yes
771	Female	12-20	Bachelor	Single	Student	Nuclear	<5	20,000-30,000	Rural area	Less accurate	More Positive	More frequent	Yes	Yes	Yes	Yes	Don't know	Don't know	Agree	Agree	Agree	Agree	Undecided	Agree	Yes	Yes	Yes	Yes	No	Yes	Yes
772	Female	21-30	Highier education (avobe bachelor)	Single	Student	Nuclear	<5	20,000-30,000	Urban area	More accurate	More Positive	More frequent	Yes	Don't know	Yes	Yes	No	No	Agree	Agree	Agree	Agree	Agree	Agree	Yes	Yes	Yes	Yes	Yes	Yes	Yes
773	Female	21-30	Bachelor	Single	Student	Nuclear	<5	20,000-30,000	Rural area	More accurate	More Positive	More frequent	Yes	No	Yes	Yes	No	No	Agree	Agree	Agree	Agree	Agree	Agree	Yes	Yes	Sometimes	Yes	Yes	Yes	Yes
774	Female	21-30	Highier education (avobe bachelor)	Single	Unemployment	Nuclear	<5	20,000-30,000	Urban area	More accurate	More Positive	More frequent	Yes	Yes	Yes	Yes	No	No	Agree	Agree	Agree	Agree	Agree	Agree	Yes	Yes	Yes	Yes	Yes	Yes	Yes
775	Female	21-30	Bachelor	Single	Student	Nuclear	<5	20,000-30,000	Rural area	More accurate	More Positive	More frequent	Yes	No	Yes	Yes	Don't know	No	Agree	Agree	Agree	Agree	Agree	Agree	Yes	Yes	Yes	Yes	No	Yes	Yes
776	Female	21-30	Highier education (avobe bachelor)	Single	Student	Nuclear	≥5	20,000-30,000	Rural area	More accurate	More Positive	More frequent	Yes	Yes	Yes	Yes	No	No	Agree	Agree	Agree	Agree	Agree	Agree	Yes	Yes	Sometimes	Yes	Yes	Yes	Yes
777	Female	12-20	Bachelor	Single	Student	Nuclear	<5	20,000-30,000	Rural area	More accurate	More Positive	More frequent	Yes	No	Yes	Yes	Yes	No	Agree	Agree	Agree	Agree	Agree	Agree	Yes	Yes	Sometimes	Yes	Yes	Yes	Yes
778	Female	12-20	Bachelor	Single	Student	Nuclear	<5	20,000-30,000	Urban area	More accurate	More Positive	More frequent	Yes	No	Yes	Yes	No	No	Agree	Agree	Agree	Agree	Agree	Agree	Yes	Yes	Yes	Yes	Yes	Yes	Yes
779	Female	12-20	Bachelor	Single	Student	Nuclear	<5	20,000-30,000	Rural area	More accurate	More Positive	More frequent	Yes	No	Yes	Yes	No	No	Agree	Agree	Agree	Agree	Undecided	Agree	Yes	Yes	Yes	Yes	No	Yes	Yes
780	Female	12-20	Bachelor	Single	Student	Nuclear	<5	20,000-30,000	Urban area	More accurate	More Positive	More frequent	Yes	No	Yes	Yes	Yes	No	Agree	Agree	Agree	Agree	Agree	Agree	Yes	Yes	Yes	Yes	No	Yes	Yes
781	Female	12-20	Bachelor	Single	Student	Nuclear	<5	20,000-30,000	Rural area	More accurate	More Positive	More frequent	Yes	Yes	Yes	Yes	Don't know	No	Agree	Agree	Agree	Agree	Agree	Agree	Yes	Yes	Yes	Yes	No	Yes	Yes
782	Female	12-20	Bachelor	Single	Student	Nuclear	<5	20,000-30,000	Rural area	More accurate	More Positive	More frequent	Yes	No	Yes	Yes	No	No	Agree	Agree	Agree	Agree	Agree	Agree	Yes	Yes	Yes	Yes	No	Yes	Yes
783	Female	12-20	Bachelor	Single	Student	Nuclear	<5	20,000-30,000	Rural area	More accurate	More Positive	More frequent	Yes	No	Yes	Yes	No	No	Agree	Agree	Agree	Agree	Agree	Agree	Yes	Yes	Yes	Yes	No	Yes	Yes
784	Male	21-30	Highier education (avobe bachelor)	Married	Govt. employee	Nuclear	<5	20,000-30,000	Urban area	More accurate	More Positive	More frequent	Yes	Yes	Yes	Yes	No	No	Agree	Agree	Agree	Agree	Agree	Agree	Yes	Yes	Yes	Yes	Yes	Yes	Yes
785	Male	>30	Highier education (avobe bachelor)	Married	Non-govt. empolyee	Nuclear	<5	20,000-30,000	Rural area	More accurate	More Positive	More frequent	Yes	Yes	Yes	Yes	Yes	No	Agree	Agree	Agree	Agree	Agree	Agree	Yes	Yes	Sometimes	Yes	Yes	Yes	Yes
786	Male	21-30	Bachelor	Married	Businessman	Nuclear	<5	20,000-30,000	Rural area	More accurate	More Positive	More frequent	Yes	No	Yes	Yes	Yes	No	Agree	Agree	Agree	Agree	Agree	Agree	Yes	Yes	Yes	Yes	Yes	Yes	Yes
787	Male	>30	Highier education (avobe bachelor)	Married	Non-govt. empolyee	Nuclear	<5	20,000-30,000	Rural area	More accurate	More Positive	More frequent	Yes	No	Yes	Yes	No	No	Agree	Agree	Agree	Agree	Agree	Agree	Yes	Yes	Yes	Yes	Yes	Yes	Yes
788	Male	21-30	Highier education (avobe bachelor)	Married	Non-govt. empolyee	Nuclear	<5	20,000-30,000	Rural area	More accurate	More Positive	More frequent	Yes	Don't know	Yes	Yes	No	No	Agree	Agree	Agree	Agree	Agree	Agree	Yes	Yes	Yes	Yes	No	Yes	Yes
789	Female	21-30	Bachelor	Married	Non-govt. empolyee	Nuclear	<5	20,000-30,000	Rural area	More accurate	More Positive	More frequent	Yes	Yes	Yes	Yes	No	No	Agree	Agree	Agree	Agree	Agree	Agree	Yes	Yes	Yes	Yes	No	Yes	Yes
790	Male	21-30	Bachelor	Single	Student	Join	≥5	20,000-30,000	Urban area	More accurate	More Positive	More frequent	Yes	No	Yes	Yes	No	No	Agree	Agree	Agree	Agree	Undecided	Agree	Yes	Yes	Yes	Yes	No	Yes	Yes
791	Male	12-20	Bachelor	Single	Student	Join	≥5	20,000-30,000	Rural area	More accurate	More Positive	More frequent	Yes	No	Yes	Yes	Yes	No	Agree	Agree	Agree	Agree	Agree	Agree	Yes	Yes	Sometimes	Yes	Yes	Yes	Yes
792	Male	12-20	Bachelor	Single	Student	Join	≥5	20,000-30,000	Urban area	Less accurate	More Positive	More frequent	Yes	Yes	Yes	Yes	No	Yes	Agree	Agree	Agree	Agree	Agree	Agree	Yes	Yes	Yes	Yes	Yes	Yes	Yes
793	Male	21-30	Bachelor	Single	Student	Join	≥5	20,000-30,000	Urban area	More accurate	More Positive	More frequent	Yes	No	Yes	Yes	Don't know	No	Agree	Agree	Agree	Agree	Agree	Agree	Yes	Yes	Yes	Yes	No	Yes	Yes
794	Male	21-30	Highier education (avobe bachelor)	Single	Unemployment	Join	≥5	20,000-30,000	Urban area	More accurate	More Positive	More frequent	Yes	No	Yes	Yes	Yes	No	Agree	Agree	Agree	Agree	Agree	Agree	Yes	Yes	Yes	Yes	Yes	Yes	Yes
795	Male	12-20	Bachelor	Single	Student	Join	≥5	20,000-30,000	Rural area	More accurate	More Positive	More frequent	Yes	No	Yes	Yes	Yes	No	Agree	Agree	Agree	Agree	Agree	Agree	Yes	Yes	Yes	Yes	Yes	Yes	Yes
796	Male	21-30	Highier education (avobe bachelor)	Single	Govt. employee	Join	<5	20,000-30,000	Urban area	More accurate	More Positive	More frequent	Yes	No	Yes	Yes	No	No	Agree	Agree	Agree	Agree	Agree	Agree	Yes	Yes	Yes	Yes	Yes	Yes	Yes
797	Male	21-30	Highier education (avobe bachelor)	Single	Non-govt. empolyee	Join	≥5	20,000-30,000	Rural area	More accurate	More Positive	More frequent	Yes	No	Yes	Yes	Yes	No	Agree	Agree	Agree	Agree	Agree	Agree	Yes	Yes	Sometimes	Yes	Yes	Yes	Yes
798	Male	>30	Bachelor	Single	Non-govt. empolyee	Join	≥5	20,000-30,000	Urban area	More accurate	More Positive	More frequent	Yes	Yes	Yes	Yes	Don't know	No	Agree	Agree	Agree	Agree	Undecided	Agree	Yes	Yes	Yes	Yes	Yes	Yes	Yes
799	Male	12-20	Intermediate (11-12)	Single	Student	Join	<5	20,000-30,000	Rural area	Less accurate	More Positive	More frequent	Yes	Yes	Yes	Yes	Don't know	Don't know	Agree	Agree	Agree	Agree	Agree	Agree	Yes	Yes	Yes	Yes	Yes	Yes	Yes
800	Female	21-30	Bachelor	Single	Student	Join	≥5	20,000-30,000	Urban area	More accurate	More Positive	More frequent	Yes	No	Yes	Yes	Yes	No	Agree	Agree	Agree	Agree	Agree	Agree	Yes	Yes	Yes	Yes	No	Yes	Yes
801	Female	21-30	Bachelor	Single	Non-govt. empolyee	Join	<5	20,000-30,000	Rural area	More accurate	More Positive	More frequent	Yes	Yes	Yes	Yes	Yes	No	Agree	Agree	Agree	Agree	Agree	Agree	Yes	Yes	Yes	Yes	Yes	Yes	Yes
802	Female	21-30	Highier education (avobe bachelor)	Single	Student	Join	≥5	20,000-30,000	Rural area	More accurate	More Positive	More frequent	Yes	No	Yes	Yes	Don't know	No	Agree	Agree	Agree	Agree	Agree	Agree	Yes	Yes	Yes	Yes	Yes	Yes	Yes
803	Female	21-30	Highier education (avobe bachelor)	Single	Non-govt. empolyee	Join	≥5	20,000-30,000	Rural area	Less accurate	More Positive	More frequent	Yes	Yes	Yes	Yes	Don't know	Yes	Agree	Agree	Agree	Agree	Agree	Agree	Yes	Yes	Yes	Yes	Yes	Yes	Sometimes
804	Male	21-30	Highier education (avobe bachelor)	Married	Govt. employee	Join	<5	20,000-30,000	Rural area	More accurate	More Positive	More frequent	Yes	Yes	Yes	Yes	Don't know	No	Agree	Agree	Agree	Agree	Agree	Agree	Yes	Yes	Yes	Yes	No	Yes	Yes
805	Female	21-30	Bachelor	Married	Student	Join	≥5	20,000-30,000	Urban area	More accurate	More Positive	More frequent	Yes	No	Yes	Yes	No	No	Agree	Agree	Agree	Agree	Agree	Agree	Yes	Yes	Yes	Yes	No	Yes	Yes
806	Female	21-30	Highier education (avobe bachelor)	Married	Student	Join	≥5	20,000-30,000	Rural area	More accurate	More Positive	More frequent	Yes	Yes	Yes	Yes	No	No	Agree	Agree	Agree	Agree	Agree	Agree	Yes	Yes	Yes	Yes	No	Yes	Yes
807	Male	21-30	Bachelor	Single	Student	Nuclear	<5	>30,000	Rural area	More accurate	More Positive	More frequent	Yes	No	Yes	Yes	No	No	Agree	Agree	Agree	Agree	Agree	Agree	Yes	Yes	Yes	Yes	No	Yes	Yes
808	Male	21-30	Bachelor	Single	Student	Nuclear	<5	>30,000	Rural area	More accurate	More Positive	More frequent	Yes	Yes	Yes	Yes	Don't know	No	Agree	Agree	Agree	Agree	Agree	Agree	Yes	Yes	Yes	Yes	No	Yes	Yes
809	Male	12-20	Bachelor	Single	Student	Nuclear	<5	>30,000	Rural area	More accurate	More Positive	More frequent	Yes	Don't know	Yes	Yes	No	No	Agree	Agree	Agree	Agree	Agree	Agree	Yes	Yes	Yes	Yes	Yes	Yes	Yes
810	Male	21-30	Bachelor	Single	Non-govt. empolyee	Nuclear	<5	>30,000	Rural area	More accurate	More Positive	More frequent	Yes	Yes	Yes	Yes	Yes	Don't know	Agree	Agree	Agree	Agree	Agree	Agree	Yes	Yes	Yes	Yes	No	Yes	Yes
811	Male	21-30	Highier education (avobe bachelor)	Single	Student	Nuclear	<5	>30,000	Urban area	More accurate	More Positive	More frequent	Yes	Yes	Yes	Yes	No	No	Agree	Agree	Agree	Agree	Agree	Agree	Yes	Yes	Yes	Yes	Yes	Yes	Yes
812	Male	12-20	Bachelor	Single	Student	Nuclear	<5	>30,000	Rural area	More accurate	More Positive	More frequent	Yes	Yes	Yes	Yes	No	No	Agree	Agree	Agree	Agree	Agree	Agree	Yes	Yes	No	Yes	Yes	Yes	Yes
813	Male	21-30	Bachelor	Single	Student	Nuclear	<5	>30,000	Rural area	More accurate	More Positive	More frequent	Yes	Yes	Yes	Yes	Yes	No	Agree	Agree	Agree	Agree	Agree	Agree	Yes	Yes	Yes	Yes	Yes	Yes	Yes
814	Male	12-20	Bachelor	Single	Student	Nuclear	<5	>30,000	Rural area	More accurate	More Positive	More frequent	Yes	No	Yes	Yes	Yes	No	Agree	Agree	Agree	Agree	Agree	Agree	Yes	Yes	Yes	Yes	Yes	Yes	Sometimes
815	Male	21-30	Bachelor	Single	Student	Nuclear	<5	>30,000	Rural area	Less accurate	More Positive	More frequent	Yes	Yes	Yes	Yes	Don't know	Don't know	Agree	Agree	Agree	Agree	Agree	Agree	Yes	Yes	Yes	Yes	No	Yes	Yes
816	Male	21-30	Highier education (avobe bachelor)	Single	Student	Nuclear	<5	>30,000	Urban area	More accurate	More Positive	More frequent	Yes	Yes	Yes	Yes	Yes	No	Agree	Agree	Agree	Agree	Agree	Agree	Yes	Yes	Yes	Yes	Yes	Yes	Yes
817	Male	21-30	Bachelor	Single	Student	Nuclear	<5	>30,000	Rural area	Less accurate	More Positive	More frequent	Yes	Yes	Yes	Yes	Don't know	Don't know	Agree	Agree	Agree	Agree	Agree	Agree	Yes	Yes	Yes	Yes	Yes	Yes	Yes
818	Male	12-20	Bachelor	Single	Student	Nuclear	<5	>30,000	Rural area	More accurate	More Positive	More frequent	Yes	Yes	Yes	Yes	Don't know	No	Agree	Agree	Agree	Agree	Agree	Agree	Yes	Yes	Yes	Yes	No	Yes	Yes
819	Male	12-20	Bachelor	Single	Student	Nuclear	<5	>30,000	Rural area	More accurate	More Positive	More frequent	Yes	Yes	Yes	Yes	No	No	Agree	Agree	Agree	Agree	Agree	Agree	Yes	Yes	Sometimes	Yes	Yes	Yes	Yes
820	Male	21-30	Intermediate (11-12)	Single	Student	Nuclear	<5	>30,000	Urban area	More accurate	More Positive	More frequent	Yes	Yes	Yes	Yes	Don't know	No	Agree	Agree	Agree	Agree	Agree	Agree	Yes	Yes	Yes	Yes	Yes	Yes	Yes
821	Male	21-30	Bachelor	Single	Student	Nuclear	<5	>30,000	Rural area	More accurate	More Positive	More frequent	Yes	Yes	Yes	Yes	Yes	No	Agree	Agree	Agree	Agree	Agree	Agree	Yes	Yes	Yes	Yes	Yes	Yes	Yes
822	Male	12-20	Bachelor	Single	Student	Nuclear	≥5	>30,000	Rural area	More accurate	More Positive	More frequent	Yes	Yes	Yes	Yes	Yes	No	Agree	Agree	Agree	Agree	Agree	Agree	Yes	Yes	Sometimes	Yes	Yes	Yes	Yes
823	Male	12-20	Intermediate (11-12)	Single	Student	Nuclear	<5	>30,000	Rural area	More accurate	More Positive	More frequent	Yes	No	Yes	Yes	Yes	No	Agree	Agree	Agree	Agree	Agree	Agree	Yes	Yes	Yes	Yes	No	Yes	Yes
824	Male	21-30	Bachelor	Single	Student	Nuclear	≥5	>30,000	Urban area	More accurate	More Positive	More frequent	Yes	Yes	Yes	Yes	No	No	Agree	Agree	Agree	Agree	Undecided	Agree	Yes	Yes	Yes	Sometimes	Yes	Yes	Yes
825	Male	21-30	Intermediate (11-12)	Single	Student	Nuclear	<5	>30,000	Rural area	More accurate	More Positive	More frequent	Yes	No	Yes	Yes	Don't know	No	Agree	Agree	Agree	Agree	Agree	Agree	Yes	Yes	Yes	Yes	No	Yes	Yes
826	Male	21-30	Intermediate (11-12)	Single	Student	Nuclear	<5	>30,000	Rural area	More accurate	More Positive	More frequent	Yes	No	Yes	Yes	Don't know	No	Agree	Agree	Agree	Agree	Agree	Agree	Yes	Yes	Yes	Yes	No	Yes	Yes
827	Male	21-30	Bachelor	Single	Student	Nuclear	<5	>30,000	Rural area	More accurate	More Positive	More frequent	Yes	No	Yes	Yes	No	No	Agree	Agree	Agree	Agree	Agree	Agree	Yes	Yes	Yes	Yes	No	Yes	Yes
828	Male	21-30	Highier education (avobe bachelor)	Single	Non-govt. empolyee	Nuclear	<5	>30,000	Rural area	More accurate	More Positive	More frequent	Yes	Yes	Yes	Yes	Yes	No	Agree	Agree	Agree	Agree	Agree	Agree	Yes	Yes	Yes	Yes	No	Yes	Yes
829	Male	21-30	Highier education (avobe bachelor)	Single	Non-govt. empolyee	Nuclear	<5	>30,000	Rural area	More accurate	More Positive	More frequent	Yes	Yes	Yes	Yes	No	No	Agree	Agree	Agree	Agree	Agree	Agree	Yes	Yes	Yes	Yes	No	Yes	Yes
830	Male	21-30	Bachelor	Single	Businessman	Nuclear	<5	>30,000	Rural area	More accurate	More Positive	More frequent	Yes	No	Yes	Yes	Yes	No	Agree	Agree	Agree	Agree	Agree	Agree	Yes	Yes	Yes	Yes	Yes	Yes	Yes
831	Male	21-30	Bachelor	Single	Student	Nuclear	≥5	>30,000	Rural area	More accurate	More Positive	More frequent	Yes	No	Yes	Yes	No	No	Agree	Agree	Agree	Agree	Agree	Agree	Yes	Yes	Yes	Yes	No	Yes	Yes
832	Male	21-30	Intermediate (11-12)	Single	Student	Nuclear	<5	>30,000	Rural area	More accurate	More Positive	More frequent	Yes	No	Yes	Yes	Don't know	No	Agree	Agree	Agree	Agree	Agree	Agree	Yes	Yes	Yes	Yes	No	Yes	Yes
833	Male	12-20	Bachelor	Single	Student	Nuclear	<5	>30,000	Rural area	More accurate	More Positive	More frequent	Yes	Yes	Yes	Yes	Yes	No	Agree	Agree	Agree	Agree	Undecided	Agree	Yes	Yes	Yes	Yes	No	Yes	Yes
834	Male	21-30	Bachelor	Single	Student	Nuclear	≥5	>30,000	Rural area	More accurate	More Positive	More frequent	Yes	Yes	Yes	Yes	No	No	Agree	Agree	Agree	Agree	Agree	Agree	Yes	Yes	Yes	Yes	Yes	Yes	Yes
835	Male	21-30	Bachelor	Single	Student	Nuclear	<5	>30,000	Rural area	More accurate	More Positive	More frequent	Yes	No	Yes	Yes	No	No	Agree	Agree	Agree	Agree	Agree	Agree	Yes	Yes	Yes	Yes	Yes	Yes	Yes
836	Male	12-20	Intermediate (11-12)	Single	Student	Nuclear	<5	>30,000	Rural area	Less accurate	More Positive	More frequent	Yes	Yes	Yes	Yes	No	Yes	Agree	Agree	Agree	Agree	Agree	Agree	Yes	Yes	Yes	Yes	Yes	Yes	Yes
837	Male	21-30	Bachelor	Single	Student	Nuclear	<5	>30,000	Rural area	More accurate	More Positive	More frequent	Yes	No	Yes	Yes	Don't know	No	Agree	Agree	Agree	Agree	Agree	Agree	Yes	Yes	Yes	Yes	Yes	Yes	Yes
838	Male	21-30	Highier education (avobe bachelor)	Single	Non-govt. empolyee	Nuclear	<5	>30,000	Rural area	More accurate	More Positive	More frequent	Yes	Yes	Yes	Yes	Yes	No	Agree	Agree	Agree	Agree	Agree	Agree	Yes	Yes	Yes	Yes	Yes	Yes	Yes
839	Male	21-30	Bachelor	Single	Student	Nuclear	≥5	>30,000	Urban area	More accurate	More Positive	More frequent	Yes	No	Yes	Yes	Yes	Yes	Agree	Agree	Agree	Agree	Agree	Agree	Yes	Yes	Yes	Yes	Yes	Yes	Yes
840	Male	>30	Bachelor	Single	Govt. employee	Nuclear	≥5	>30,000	Rural area	More accurate	More Positive	More frequent	Yes	No	Yes	Yes	Yes	No	Agree	Agree	Agree	Agree	Agree	Agree	Yes	Yes	Yes	Yes	Yes	Yes	Yes
841	Male	21-30	Bachelor	Single	Student	Nuclear	<5	>30,000	Rural area	More accurate	More Positive	More frequent	Yes	Yes	Yes	Yes	Yes	No	Agree	Agree	Agree	Agree	Agree	Agree	Yes	Yes	Yes	Yes	Yes	Yes	Yes
842	Male	21-30	Highier education (avobe bachelor)	Single	Student	Nuclear	<5	>30,000	Rural area	More accurate	More Positive	More frequent	Yes	Yes	Yes	Yes	No	No	Agree	Agree	Agree	Agree	Agree	Agree	Yes	Yes	Yes	Yes	No	Yes	Yes
843	Male	21-30	Highier education (avobe bachelor)	Single	Unemployment	Nuclear	<5	>30,000	Rural area	More accurate	More Positive	More frequent	Yes	Yes	Yes	Yes	No	No	Agree	Agree	Agree	Agree	Agree	Agree	Yes	Yes	Yes	Yes	Yes	Yes	Yes
844	Male	21-30	Bachelor	Single	Student	Nuclear	≥5	>30,000	Urban area	More accurate	More Positive	More frequent	Yes	No	Yes	Yes	Don't know	No	Agree	Agree	Agree	Agree	Agree	Agree	Yes	Yes	Yes	Yes	No	Yes	Yes
845	Male	21-30	Bachelor	Single	Non-govt. empolyee	Nuclear	<5	>30,000	Rural area	More accurate	More Positive	More frequent	Yes	No	Yes	Yes	No	No	Agree	Agree	Agree	Agree	Agree	Agree	Yes	Yes	Yes	Yes	No	Yes	Yes
846	Male	21-30	Highier education (avobe bachelor)	Single	Non-govt. empolyee	Nuclear	<5	>30,000	Rural area	More accurate	More Positive	More frequent	Yes	No	Yes	Yes	Yes	No	Agree	Agree	Agree	Agree	Agree	Agree	Yes	Yes	Yes	Yes	No	Yes	Yes
847	Male	21-30	Highier education (avobe bachelor)	Single	Non-govt. empolyee	Nuclear	<5	>30,000	Rural area	More accurate	More Positive	More frequent	Yes	Yes	Yes	Yes	Don't know	No	Agree	Agree	Agree	Undecided	Agree	Agree	Yes	Yes	Yes	Yes	Yes	Yes	Yes
848	Male	21-30	Bachelor	Single	Non-govt. empolyee	Nuclear	<5	>30,000	Rural area	More accurate	More Positive	More frequent	Yes	No	Yes	Yes	No	No	Agree	Agree	Agree	Agree	Agree	Agree	Sometimes	Yes	Yes	Yes	Yes	Yes	Yes
849	Male	12-20	Bachelor	Single	Student	Nuclear	<5	>30,000	Rural area	More accurate	More Positive	More frequent	Yes	No	Yes	Yes	Don't know	No	Agree	Agree	Agree	Agree	Undecided	Agree	Yes	Yes	Yes	Yes	Yes	Sometimes	Yes
850	Male	>30	Highier education (avobe bachelor)	Single	Non-govt. empolyee	Nuclear	<5	>30,000	Rural area	More accurate	More Positive	More frequent	Yes	No	Yes	Yes	No	No	Agree	Agree	Agree	Agree	Agree	Agree	Yes	Yes	Yes	Yes	No	Yes	Yes
851	Male	21-30	Highier education (avobe bachelor)	Single	Student	Nuclear	<5	>30,000	Rural area	More accurate	More Positive	More frequent	Yes	Yes	Yes	Yes	Don't know	No	Agree	Agree	Agree	Agree	Undecided	Agree	Yes	Yes	Yes	Yes	Yes	Yes	Yes
852	Male	21-30	Highier education (avobe bachelor)	Single	Student	Nuclear	<5	>30,000	Rural area	More accurate	More Positive	More frequent	Yes	Yes	Yes	Yes	Yes	No	Agree	Agree	Agree	Agree	Undecided	Agree	Yes	Yes	Yes	Yes	No	Yes	Yes
853	Male	21-30	Bachelor	Single	Non-govt. empolyee	Nuclear	<5	>30,000	Rural area	More accurate	More Positive	More frequent	Yes	Yes	Yes	Yes	Don't know	No	Agree	Agree	Agree	Agree	Agree	Agree	Yes	Yes	Yes	Yes	Yes	Yes	Sometimes
854	Male	21-30	Highier education (avobe bachelor)	Single	Non-govt. empolyee	Nuclear	<5	>30,000	Rural area	More accurate	More Positive	More frequent	Yes	No	Yes	Yes	No	No	Agree	Agree	Agree	Agree	Agree	Agree	Yes	Yes	Yes	Yes	Yes	Yes	Yes
855	Male	21-30	Bachelor	Single	Student	Nuclear	<5	>30,000	Rural area	More accurate	More Positive	More frequent	Yes	No	Yes	Yes	No	No	Agree	Agree	Agree	Agree	Agree	Agree	Yes	Yes	Yes	Yes	Yes	Yes	Yes
856	Male	21-30	Bachelor	Single	Non-govt. empolyee	Nuclear	<5	>30,000	Rural area	More accurate	More Positive	More frequent	Yes	No	Yes	Yes	No	No	Agree	Agree	Agree	Agree	Agree	Agree	Yes	Yes	Yes	Yes	No	Yes	Yes
857	Male	12-20	Bachelor	Single	Student	Nuclear	<5	>30,000	Rural area	More accurate	More Positive	More frequent	Yes	Yes	Yes	Yes	Yes	No	Agree	Agree	Agree	Agree	Agree	Agree	Yes	Yes	Yes	Yes	No	Yes	Yes
858	Male	21-30	Highier education (avobe bachelor)	Single	Non-govt. empolyee	Nuclear	<5	>30,000	Rural area	More accurate	More Positive	More frequent	Yes	Yes	Yes	Yes	Yes	No	Agree	Agree	Agree	Agree	Agree	Agree	Yes	Yes	Yes	Yes	No	Yes	Yes
859	Male	21-30	Highier education (avobe bachelor)	Single	Govt. employee	Nuclear	<5	>30,000	Rural area	More accurate	More Positive	More frequent	Yes	No	Yes	Yes	No	No	Agree	Agree	Agree	Agree	Agree	Agree	Yes	Yes	Yes	Yes	No	Yes	Yes
860	Male	21-30	Highier education (avobe bachelor)	Single	Student	Nuclear	<5	>30,000	Rural area	More accurate	More Positive	More frequent	Yes	No	Yes	Yes	Don't know	No	Agree	Agree	Agree	Agree	Agree	Agree	Yes	Yes	Yes	Yes	Yes	Yes	Yes
861	Female	12-20	Bachelor	Single	Student	Nuclear	<5	>30,000	Rural area	More accurate	More Positive	More frequent	Yes	Yes	Yes	Yes	Yes	No	Agree	Agree	Agree	Agree	Agree	Agree	Yes	Yes	Yes	Yes	No	Yes	Yes
862	Female	21-30	Bachelor	Single	Student	Nuclear	≥5	>30,000	Rural area	More accurate	More Positive	More frequent	Yes	No	Yes	Yes	Don't know	No	Agree	Agree	Agree	Agree	Agree	Agree	Yes	Yes	No	Yes	Yes	Yes	Yes
863	Female	21-30	Bachelor	Single	Student	Nuclear	<5	>30,000	Rural area	More accurate	More Positive	More frequent	Yes	No	Yes	Yes	Yes	No	Agree	Agree	Agree	Agree	Agree	Agree	Yes	Yes	Yes	Yes	No	Yes	Yes
864	Female	12-20	Intermediate (11-12)	Single	Student	Nuclear	<5	>30,000	Rural area	More accurate	More Positive	More frequent	Yes	No	Yes	Yes	Yes	No	Agree	Agree	Agree	Agree	Agree	Agree	Yes	Yes	Yes	Yes	Yes	Yes	Yes
865	Female	21-30	Bachelor	Single	Student	Nuclear	<5	>30,000	Urban area	More accurate	More Positive	More frequent	Yes	No	Yes	Yes	No	No	Agree	Agree	Agree	Agree	Agree	Agree	Yes	Yes	Yes	Yes	Yes	Yes	Yes
866	Female	12-20	Bachelor	Single	Student	Nuclear	<5	>30,000	Rural area	More accurate	More Positive	More frequent	Yes	Yes	Yes	Yes	Yes	No	Agree	Agree	Agree	Agree	Agree	Agree	Yes	Yes	Yes	Yes	No	Yes	Yes
867	Female	12-20	Bachelor	Single	Student	Nuclear	≥5	>30,000	Rural area	More accurate	More Positive	More frequent	Yes	Yes	Yes	Yes	Don't know	No	Agree	Agree	Agree	Agree	Undecided	Agree	Yes	Yes	Yes	Yes	No	Yes	Yes
868	Female	12-20	Bachelor	Single	Student	Nuclear	<5	>30,000	Rural area	More accurate	More Positive	More frequent	Yes	Yes	Yes	Yes	Yes	No	Agree	Agree	Agree	Agree	Undecided	Agree	Yes	Yes	Yes	Yes	Yes	Yes	Yes
869	Female	21-30	Bachelor	Single	Student	Nuclear	<5	>30,000	Rural area	More accurate	More Positive	More frequent	Yes	No	Yes	Yes	Don't know	No	Agree	Agree	Agree	Agree	Undecided	Agree	Yes	Yes	Yes	Yes	No	Yes	Yes
870	Female	21-30	Bachelor	Single	Student	Nuclear	<5	>30,000	Rural area	More accurate	More Positive	More frequent	Yes	No	Yes	Yes	Yes	No	Agree	Agree	Agree	Agree	Agree	Agree	Yes	Yes	Yes	Yes	No	Yes	Yes
871	Female	12-20	Bachelor	Single	Student	Nuclear	<5	>30,000	Rural area	More accurate	More Positive	More frequent	Yes	No	Yes	Yes	No	No	Agree	Agree	Agree	Agree	Agree	Agree	Yes	Yes	Yes	Yes	Yes	Yes	Yes
872	Female	12-20	Bachelor	Single	Student	Nuclear	<5	>30,000	Rural area	More accurate	More Positive	More frequent	Yes	No	Yes	Yes	Yes	No	Agree	Agree	Agree	Agree	Agree	Agree	Yes	Yes	Yes	Yes	Yes	Yes	Yes
873	Female	12-20	Bachelor	Single	Student	Nuclear	<5	>30,000	Rural area	More accurate	More Positive	More frequent	Yes	Yes	Yes	Yes	Yes	No	Agree	Agree	Agree	Agree	Agree	Agree	Yes	Yes	Yes	Yes	No	Yes	Yes
874	Female	12-20	Bachelor	Single	Student	Nuclear	<5	>30,000	Urban area	More accurate	More Positive	More frequent	Yes	Yes	Yes	Yes	No	No	Agree	Agree	Agree	Agree	Agree	Agree	Yes	Yes	Yes	Yes	No	Yes	Yes
875	Female	21-30	Bachelor	Single	Student	Nuclear	≥5	>30,000	Rural area	More accurate	More Positive	More frequent	Yes	Yes	Yes	Yes	Don't know	No	Agree	Agree	Agree	Agree	Agree	Agree	Yes	Yes	Yes	Yes	No	Yes	Yes
876	Female	12-20	Bachelor	Single	Student	Nuclear	≥5	>30,000	Rural area	More accurate	More Positive	More frequent	Yes	Yes	Yes	Yes	Yes	No	Agree	Agree	Agree	Agree	Agree	Agree	Yes	Yes	No	Yes	Yes	Yes	Yes
877	Female	21-30	Bachelor	Single	Student	Nuclear	<5	>30,000	Rural area	Less accurate	More Positive	More frequent	Yes	Yes	Yes	Yes	No	Don't know	Agree	Agree	Agree	Agree	Undecided	Agree	Yes	Yes	Sometimes	Yes	Yes	Yes	Yes
878	Female	21-30	Bachelor	Single	Student	Nuclear	<5	>30,000	Rural area	More accurate	More Positive	More frequent	Yes	No	Yes	Yes	No	No	Agree	Agree	Agree	Agree	Agree	Agree	Yes	Yes	Yes	Yes	No	Yes	Yes
879	Female	12-20	Bachelor	Single	Student	Nuclear	<5	>30,000	Rural area	More accurate	More Positive	More frequent	Yes	Yes	Yes	Yes	Don't know	No	Agree	Agree	Agree	Agree	Agree	Agree	Yes	Yes	Yes	Yes	Yes	Yes	Yes
880	Female	21-30	Bachelor	Single	Student	Nuclear	<5	>30,000	Rural area	More accurate	More Positive	More frequent	Yes	Yes	Yes	Yes	Yes	No	Agree	Agree	Agree	Agree	Agree	Agree	No	Yes	Yes	Yes	Yes	Yes	Yes
881	Female	21-30	Highier education (avobe bachelor)	Single	Student	Nuclear	≥5	>30,000	Rural area	More accurate	More Positive	More frequent	Yes	Yes	Yes	Yes	No	No	Agree	Agree	Agree	Agree	Undecided	Agree	Yes	Yes	Yes	Yes	No	Yes	Yes
882	Female	21-30	Highier education (avobe bachelor)	Single	Student	Nuclear	<5	>30,000	Rural area	Less accurate	More Positive	More frequent	No	Yes	Yes	Yes	Yes	Don't know	Agree	Agree	Agree	Agree	Agree	Agree	Yes	Yes	Sometimes	Yes	Yes	Yes	Yes
883	Female	21-30	Bachelor	Single	Student	Nuclear	<5	>30,000	Urban area	More accurate	More Positive	More frequent	Yes	Don't know	Yes	Yes	Don't know	No	Agree	Agree	Agree	Agree	Undecided	Agree	Yes	Yes	Yes	Yes	Yes	Yes	Yes
884	Female	21-30	Bachelor	Single	Student	Nuclear	≥5	>30,000	Urban area	More accurate	More Positive	More frequent	Yes	No	Yes	Yes	Yes	No	Agree	Agree	Agree	Agree	Agree	Agree	Yes	Yes	Yes	Yes	Yes	Yes	Yes
885	Female	12-20	Bachelor	Single	Student	Nuclear	<5	>30,000	Urban area	More accurate	More Positive	More frequent	Yes	No	Yes	Yes	No	No	Agree	Agree	Agree	Undecided	Agree	Agree	Yes	Yes	Yes	Yes	No	Yes	Yes
886	Female	21-30	Bachelor	Single	Student	Nuclear	<5	>30,000	Rural area	More accurate	More Positive	More frequent	Yes	No	Yes	Yes	No	No	Agree	Agree	Agree	Agree	Agree	Agree	Yes	Yes	Yes	Yes	No	Yes	Yes
887	Female	12-20	Bachelor	Single	Student	Nuclear	<5	>30,000	Rural area	More accurate	More Positive	More frequent	Yes	Yes	Yes	Yes	Yes	No	Agree	Agree	Agree	Agree	Agree	Agree	Yes	Yes	Yes	Yes	Yes	Yes	Yes
888	Female	21-30	Highier education (avobe bachelor)	Single	Govt. employee	Nuclear	≥5	>30,000	Rural area	More accurate	More Positive	More frequent	Yes	No	Yes	Yes	No	No	Agree	Agree	Agree	Agree	Agree	Agree	Yes	Yes	Yes	Yes	No	Yes	Yes
889	Female	21-30	Bachelor	Single	Non-govt. empolyee	Nuclear	<5	>30,000	Rural area	More accurate	More Positive	More frequent	Yes	Yes	Yes	Yes	No	No	Agree	Agree	Agree	Agree	Agree	Agree	Yes	Yes	Sometimes	Yes	Yes	Yes	Yes
890	Female	21-30	Highier education (avobe bachelor)	Single	Student	Nuclear	≥5	>30,000	Rural area	More accurate	More Positive	More frequent	Yes	No	Yes	Yes	No	Yes	Agree	Agree	Agree	Agree	Agree	Agree	Yes	Yes	Yes	Yes	Yes	Yes	Yes
891	Female	12-20	Bachelor	Single	Student	Nuclear	≥5	>30,000	Urban area	More accurate	More Positive	More frequent	Yes	No	Yes	Yes	Don't know	No	Agree	Agree	Agree	Agree	Agree	Agree	Yes	Yes	Yes	Yes	No	Yes	Yes
892	Female	21-30	Bachelor	Single	Student	Nuclear	<5	>30,000	Rural area	More accurate	More Positive	More frequent	Yes	No	Yes	Yes	Don't know	No	Agree	Agree	Agree	Agree	Undecided	Agree	Yes	Yes	Yes	Yes	No	Yes	Yes
893	Female	21-30	Bachelor	Single	Student	Nuclear	<5	>30,000	Rural area	More accurate	More Positive	More frequent	Yes	Yes	Yes	Yes	Yes	Don't know	Agree	Agree	Agree	Agree	Agree	Agree	Yes	Yes	Yes	Yes	Yes	Yes	Yes
894	Female	21-30	Highier education (avobe bachelor)	Single	Student	Nuclear	<5	>30,000	Rural area	More accurate	More Positive	More frequent	Yes	No	Yes	Yes	Don't know	No	Agree	Agree	Agree	Agree	Agree	Agree	Yes	Yes	Yes	Yes	No	Yes	Yes
895	Female	21-30	Highier education (avobe bachelor)	Single	Govt. employee	Nuclear	≥5	>30,000	Urban area	More accurate	More Positive	More frequent	Yes	No	Yes	Yes	Yes	No	Agree	Agree	Agree	Agree	Agree	Agree	Yes	Yes	Yes	Yes	Yes	Yes	Yes
896	Female	21-30	Highier education (avobe bachelor)	Single	Non-govt. empolyee	Nuclear	<5	>30,000	Rural area	More accurate	More Positive	More frequent	Yes	No	Yes	Yes	No	No	Agree	Agree	Agree	Agree	Agree	Agree	Yes	Yes	Sometimes	Yes	Yes	Yes	Yes
897	Female	21-30	Highier education (avobe bachelor)	Single	Govt. employee	Nuclear	<5	>30,000	Urban area	More accurate	More Positive	More frequent	Yes	No	Yes	Yes	Yes	Don't know	Agree	Agree	Agree	Agree	Undecided	Agree	Yes	Yes	Sometimes	Yes	Yes	Yes	Yes
898	Female	12-20	Bachelor	Single	Student	Nuclear	<5	>30,000	Rural area	More accurate	More Positive	More frequent	Yes	Yes	Yes	Yes	Yes	No	Agree	Agree	Agree	Agree	Agree	Agree	Yes	Yes	Yes	Yes	No	Yes	Yes
899	Female	21-30	Highier education (avobe bachelor)	Single	Non-govt. empolyee	Nuclear	<5	>30,000	Rural area	More accurate	More Positive	More frequent	Yes	No	Yes	Yes	No	No	Agree	Agree	Agree	Agree	Agree	Agree	Yes	Yes	Sometimes	Yes	Yes	Yes	Yes
900	Female	12-20	Bachelor	Single	Student	Nuclear	<5	>30,000	Rural area	More accurate	More Positive	More frequent	Yes	Yes	Yes	Yes	No	No	Agree	Agree	Agree	Agree	Agree	Agree	Yes	Yes	Yes	Yes	No	Yes	Yes
901	Female	21-30	Highier education (avobe bachelor)	Single	Govt. employee	Nuclear	≥5	>30,000	Rural area	More accurate	More Positive	More frequent	Yes	No	Yes	Yes	No	No	Agree	Agree	Agree	Agree	Agree	Agree	Yes	Yes	Yes	Yes	No	Yes	Yes
902	Female	21-30	Bachelor	Single	Student	Nuclear	≥5	>30,000	Rural area	Less accurate	More Positive	More frequent	Yes	Yes	Yes	Yes	No	Yes	Agree	Agree	Agree	Agree	Agree	Agree	Yes	Yes	Yes	Yes	No	Yes	Yes
903	Female	21-30	Highier education (avobe bachelor)	Single	Non-govt. empolyee	Nuclear	<5	>30,000	Rural area	More accurate	More Positive	More frequent	Yes	Yes	Yes	Yes	Yes	No	Agree	Agree	Agree	Agree	Agree	Agree	Yes	Yes	Yes	Yes	Yes	Yes	Yes
904	Female	12-20	Bachelor	Single	Student	Nuclear	<5	>30,000	Rural area	More accurate	More Positive	More frequent	Yes	No	Yes	Yes	Yes	No	Agree	Agree	Agree	Agree	Agree	Agree	Yes	Yes	Sometimes	Yes	Yes	Yes	Yes
905	Female	21-30	Highier education (avobe bachelor)	Single	Student	Nuclear	≥5	>30,000	Rural area	More accurate	More Positive	More frequent	Yes	No	Yes	Yes	Yes	No	Agree	Agree	Agree	Agree	Agree	Agree	Yes	Yes	Yes	Yes	Yes	Yes	Yes
906	Female	12-20	Secondary (6-10)	Single	Student	Nuclear	<5	>30,000	Rural area	More accurate	More Positive	More frequent	Yes	No	Yes	Yes	Yes	No	Agree	Agree	Agree	Agree	Agree	Agree	Yes	Yes	Yes	Yes	No	Yes	Yes
907	Female	21-30	Highier education (avobe bachelor)	Single	Non-govt. empolyee	Nuclear	<5	>30,000	Rural area	More accurate	More Positive	More frequent	Yes	Yes	Yes	Yes	Yes	No	Agree	Agree	Agree	Agree	Agree	Agree	Yes	Yes	Yes	Yes	Yes	Yes	Yes
908	Female	12-20	Bachelor	Single	Student	Nuclear	<5	>30,000	Rural area	More accurate	More Positive	More frequent	Yes	Yes	Yes	Yes	Yes	Yes	Agree	Agree	Agree	Agree	Agree	Agree	Yes	Yes	Yes	Yes	No	Yes	Yes
909	Female	21-30	Bachelor	Single	Student	Nuclear	<5	>30,000	Urban area	More accurate	More Positive	More frequent	Yes	No	Yes	Yes	Yes	No	Agree	Agree	Agree	Agree	Agree	Agree	Yes	Yes	Yes	Yes	No	Yes	Yes
910	Female	21-30	Bachelor	Single	Student	Nuclear	<5	>30,000	Urban area	More accurate	More Positive	More frequent	Yes	No	Yes	Yes	Yes	No	Agree	Agree	Agree	Agree	Agree	Agree	Yes	Yes	Yes	Yes	No	Yes	Yes
911	Female	12-20	Secondary (6-10)	Single	Student	Nuclear	<5	>30,000	Urban area	More accurate	More Positive	More frequent	Yes	No	Yes	Yes	Yes	No	Agree	Agree	Agree	Agree	Agree	Agree	Yes	Yes	Yes	Yes	No	Yes	Yes
912	Female	21-30	Bachelor	Single	Govt. employee	Nuclear	<5	>30,000	Rural area	More accurate	More Positive	More frequent	Yes	No	Yes	Yes	No	No	Agree	Agree	Agree	Agree	Agree	Agree	Yes	Yes	Yes	Yes	Yes	Yes	Yes
913	Female	21-30	Highier education (avobe bachelor)	Single	Non-govt. empolyee	Nuclear	<5	>30,000	Rural area	More accurate	More Positive	More frequent	Yes	Yes	Yes	Yes	No	No	Agree	Agree	Agree	Agree	Agree	Agree	Yes	Yes	Yes	Yes	Yes	Yes	Yes
914	Female	21-30	Highier education (avobe bachelor)	Single	Non-govt. empolyee	Nuclear	<5	>30,000	Rural area	More accurate	More Positive	More frequent	Yes	No	Yes	Yes	No	No	Agree	Agree	Agree	Agree	Agree	Agree	Yes	Yes	Yes	Yes	Yes	Yes	Yes
915	Female	21-30	Highier education (avobe bachelor)	Single	Non-govt. empolyee	Nuclear	<5	>30,000	Urban area	More accurate	More Positive	More frequent	Yes	No	Yes	Yes	No	No	Agree	Agree	Agree	Agree	Agree	Agree	Yes	Yes	Yes	Yes	No	Yes	Yes
916	Female	21-30	Highier education (avobe bachelor)	Single	Student	Nuclear	<5	>30,000	Rural area	More accurate	More Positive	More frequent	Yes	No	Yes	Yes	Yes	No	Agree	Agree	Agree	Agree	Agree	Agree	Yes	Yes	Yes	Yes	Yes	Yes	Yes
917	Female	21-30	Highier education (avobe bachelor)	Single	Student	Nuclear	<5	>30,000	Rural area	More accurate	More Positive	More frequent	Yes	No	Yes	Yes	Yes	No	Agree	Agree	Agree	Agree	Agree	Agree	Yes	Yes	Yes	Yes	Yes	Yes	Yes
918	Female	21-30	Highier education (avobe bachelor)	Single	Student	Nuclear	<5	>30,000	Rural area	More accurate	More Positive	More frequent	Yes	No	Yes	Yes	Yes	No	Agree	Agree	Agree	Agree	Agree	Agree	Yes	Yes	Yes	Yes	Yes	Yes	Yes
919	Female	21-30	Highier education (avobe bachelor)	Single	Student	Nuclear	<5	>30,000	Rural area	More accurate	More Positive	More frequent	Yes	No	Yes	Yes	Yes	No	Agree	Agree	Agree	Agree	Agree	Agree	Yes	Yes	Yes	Yes	Yes	Yes	Yes
920	Female	21-30	Highier education (avobe bachelor)	Single	Student	Nuclear	<5	>30,000	Rural area	More accurate	More Positive	More frequent	Yes	No	Yes	Yes	Yes	No	Agree	Agree	Agree	Agree	Agree	Agree	Yes	Yes	Yes	Yes	Yes	Yes	Yes
921	Female	21-30	Highier education (avobe bachelor)	Single	Student	Nuclear	<5	>30,000	Rural area	More accurate	More Positive	More frequent	Yes	No	Yes	Yes	Yes	No	Agree	Agree	Agree	Agree	Agree	Agree	Yes	Yes	Yes	Yes	Yes	Yes	Yes
922	Female	21-30	Bachelor	Single	Student	Nuclear	<5	>30,000	Urban area	More accurate	More Positive	More frequent	Yes	No	Yes	Yes	Yes	No	Agree	Agree	Agree	Agree	Agree	Agree	Yes	Yes	Yes	Yes	Yes	Yes	Yes
923	Female	21-30	Highier education (avobe bachelor)	Single	Non-govt. empolyee	Nuclear	<5	>30,000	Rural area	More accurate	More Positive	More frequent	Yes	Yes	Yes	Yes	No	No	Agree	Agree	Agree	Agree	Agree	Agree	Yes	Yes	Yes	Yes	Yes	Yes	Yes
924	Female	21-30	Highier education (avobe bachelor)	Single	Non-govt. empolyee	Nuclear	<5	>30,000	Urban area	More accurate	More Positive	More frequent	Yes	No	Yes	Yes	No	No	Agree	Agree	Agree	Agree	Agree	Agree	Yes	Yes	Yes	Yes	Yes	Yes	Yes
925	Female	21-30	Highier education (avobe bachelor)	Single	Student	Nuclear	<5	>30,000	Rural area	More accurate	More Positive	More frequent	Yes	No	Yes	Yes	No	No	Agree	Agree	Agree	Agree	Agree	Agree	Yes	Yes	Yes	Yes	Yes	Yes	Yes
926	Male	>30	Highier education (avobe bachelor)	Married	Non-govt. empolyee	Nuclear	<5	>30,000	Rural area	More accurate	More Positive	More frequent	Yes	Yes	Yes	Yes	Don't know	No	Agree	Agree	Agree	Agree	Undecided	Agree	Yes	Yes	Yes	Yes	Yes	Yes	Yes
927	Male	21-30	Highier education (avobe bachelor)	Married	Non-govt. empolyee	Nuclear	<5	>30,000	Rural area	More accurate	More Positive	More frequent	Yes	Don't know	Yes	Yes	Don't know	No	Agree	Agree	Agree	Agree	Agree	Agree	Yes	Yes	Yes	Yes	Yes	Yes	Yes
928	Male	>30	Highier education (avobe bachelor)	Married	Non-govt. empolyee	Nuclear	<5	>30,000	Rural area	More accurate	More Positive	More frequent	Yes	Yes	Yes	Yes	No	No	Agree	Agree	Agree	Agree	Agree	Agree	Yes	Yes	Yes	Yes	No	Yes	Yes
929	Male	>30	Bachelor	Married	Govt. employee	Nuclear	<5	>30,000	Rural area	More accurate	More Positive	More frequent	Yes	No	Yes	Yes	No	No	Agree	Agree	Agree	Agree	Agree	Agree	Yes	Yes	Yes	Yes	Yes	Yes	Yes
930	Male	>30	Highier education (avobe bachelor)	Married	Govt. employee	Nuclear	<5	>30,000	Rural area	More accurate	More Positive	More frequent	Yes	Yes	Yes	Yes	No	No	Agree	Agree	Agree	Agree	Agree	Agree	Yes	Yes	Sometimes	Yes	Yes	Yes	Yes
931	Male	21-30	Highier education (avobe bachelor)	Married	Non-govt. empolyee	Nuclear	<5	>30,000	Urban area	More accurate	More Positive	More frequent	Yes	Yes	Yes	Yes	Don't know	No	Agree	Agree	Agree	Agree	Agree	Agree	Yes	Yes	Yes	Yes	Yes	Yes	Yes
932	Male	21-30	Highier education (avobe bachelor)	Married	Non-govt. empolyee	Nuclear	≥5	>30,000	Urban area	More accurate	More Positive	More frequent	Yes	No	Yes	Yes	Yes	No	Agree	Agree	Agree	Agree	Agree	Agree	Yes	Yes	Sometimes	Yes	Yes	Yes	Yes
933	Male	>30	Highier education (avobe bachelor)	Married	Non-govt. empolyee	Nuclear	<5	>30,000	Rural area	More accurate	More Positive	More frequent	Yes	No	Yes	Yes	No	No	Agree	Agree	Agree	Agree	Agree	Agree	Yes	Yes	Yes	Yes	Yes	Yes	Yes
934	Male	21-30	Highier education (avobe bachelor)	Married	Govt. employee	Nuclear	<5	>30,000	Rural area	More accurate	More Positive	More frequent	Yes	No	Yes	Yes	Yes	No	Agree	Agree	Agree	Agree	Agree	Agree	Yes	Yes	Sometimes	Yes	Yes	Yes	Yes
935	Male	>30	Highier education (avobe bachelor)	Married	Non-govt. empolyee	Nuclear	<5	>30,000	Rural area	More accurate	More Positive	More frequent	Yes	Don't know	Yes	Yes	Don't know	No	Agree	Agree	Agree	Agree	Agree	Agree	Yes	Yes	Yes	Yes	No	Yes	Yes
936	Male	>30	Highier education (avobe bachelor)	Married	Non-govt. empolyee	Nuclear	<5	>30,000	Rural area	More accurate	More Positive	More frequent	Yes	No	Yes	Yes	Yes	No	Agree	Agree	Agree	Agree	Agree	Agree	Yes	Yes	Yes	Yes	Yes	Yes	Yes
937	Male	21-30	Highier education (avobe bachelor)	Married	Non-govt. empolyee	Nuclear	<5	>30,000	Rural area	More accurate	More Positive	More frequent	Yes	No	Yes	Yes	No	No	Agree	Agree	Agree	Agree	Agree	Agree	Yes	Yes	Yes	Yes	Yes	Yes	Yes
938	Female	21-30	Bachelor	Married	Student	Nuclear	<5	>30,000	Rural area	More accurate	More Positive	More frequent	Yes	Don't know	Yes	Yes	Yes	No	Agree	Agree	Agree	Agree	Agree	Agree	Yes	Yes	Sometimes	Yes	Yes	Yes	Yes
939	Female	>30	Highier education (avobe bachelor)	Married	Non-govt. empolyee	Nuclear	<5	>30,000	Rural area	Less accurate	More Positive	More frequent	Yes	Yes	Yes	Yes	Don't know	Don't know	Agree	Agree	Agree	Agree	Undecided	Agree	Yes	Yes	Yes	Yes	No	Yes	Yes
940	Female	21-30	Highier education (avobe bachelor)	Married	Non-govt. empolyee	Nuclear	<5	>30,000	Rural area	More accurate	More Positive	More frequent	Yes	Yes	Yes	Yes	Don't know	No	Agree	Agree	Agree	Agree	Agree	Agree	Yes	Yes	Yes	Yes	Yes	Yes	Yes
941	Female	>30	Intermediate (11-12)	Married	Housewife	Nuclear	<5	>30,000	Rural area	More accurate	More Positive	More frequent	Yes	No	Yes	Yes	Don't know	No	Agree	Agree	Agree	Agree	Agree	Agree	Yes	Yes	Yes	Yes	No	Yes	Yes
942	Female	21-30	Bachelor	Married	Housewife	Nuclear	<5	>30,000	Rural area	More accurate	More Positive	More frequent	Yes	Yes	Yes	Yes	No	No	Agree	Agree	Agree	Agree	Agree	Agree	Yes	Yes	Yes	Yes	Yes	Yes	Yes
943	Female	>30	Bachelor	Married	Housewife	Nuclear	<5	>30,000	Rural area	More accurate	More Positive	More frequent	Yes	Yes	Yes	Yes	No	No	Agree	Agree	Agree	Agree	Agree	Agree	Yes	Yes	Yes	Yes	Yes	Yes	Yes
944	Female	21-30	Highier education (avobe bachelor)	Married	Housewife	Nuclear	<5	>30,000	Rural area	More accurate	More Positive	More frequent	Yes	No	Yes	Yes	Yes	No	Agree	Agree	Agree	Agree	Agree	Agree	Yes	Yes	Sometimes	Yes	Yes	Yes	Yes
945	Female	21-30	Highier education (avobe bachelor)	Married	Non-govt. empolyee	Nuclear	<5	>30,000	Urban area	More accurate	More Positive	More frequent	Yes	No	Yes	Yes	Yes	No	Agree	Agree	Agree	Agree	Agree	Agree	Yes	Yes	Yes	Yes	Yes	Yes	Yes
946	Female	21-30	Bachelor	Married	Student	Nuclear	<5	>30,000	Rural area	More accurate	More Positive	More frequent	Yes	No	Yes	Yes	No	No	Agree	Agree	Agree	Agree	Undecided	Agree	Yes	Yes	Yes	Yes	No	Yes	Yes
947	Female	>30	Highier education (avobe bachelor)	Married	Housewife	Nuclear	<5	>30,000	Rural area	More accurate	More Positive	More frequent	Yes	Yes	Yes	Yes	Yes	No	Agree	Agree	Agree	Agree	Agree	Agree	Yes	Yes	Yes	Yes	No	Yes	Yes
948	Female	21-30	Highier education (avobe bachelor)	Married	Govt. employee	Nuclear	<5	>30,000	Rural area	More accurate	More Positive	More frequent	Yes	No	Yes	Yes	Yes	No	Agree	Agree	Agree	Agree	Agree	Agree	Yes	Yes	Yes	Yes	Yes	Yes	Yes
949	Female	21-30	Highier education (avobe bachelor)	Married	Non-govt. empolyee	Nuclear	<5	>30,000	Rural area	More accurate	More Positive	More frequent	Yes	Yes	Yes	Yes	No	No	Agree	Agree	Agree	Agree	Agree	Agree	Sometimes	Yes	Yes	Yes	Yes	Yes	Yes
950	Female	21-30	Highier education (avobe bachelor)	Married	Non-govt. empolyee	Nuclear	<5	>30,000	Urban area	More accurate	More Positive	More frequent	Yes	Yes	Yes	Yes	Don't know	No	Agree	Agree	Agree	Agree	Agree	Agree	Yes	Yes	Yes	Yes	Yes	Yes	Yes
951	Female	>30	Highier education (avobe bachelor)	Married	Govt. employee	Nuclear	<5	>30,000	Rural area	More accurate	More Positive	More frequent	Yes	Yes	Yes	Yes	No	No	Agree	Agree	Agree	Agree	Agree	Agree	Yes	Yes	Yes	Yes	Yes	Yes	Yes
952	Female	12-20	Bachelor	Married	Student	Nuclear	<5	>30,000	Rural area	More accurate	More Positive	More frequent	Yes	No	Yes	Yes	No	No	Agree	Agree	Agree	Agree	Agree	Agree	Yes	Yes	Yes	Yes	Yes	Yes	Yes
953	Female	21-30	Highier education (avobe bachelor)	Married	Govt. employee	Nuclear	<5	>30,000	Urban area	More accurate	More Positive	More frequent	Yes	No	Yes	Yes	No	No	Agree	Agree	Agree	Agree	Agree	Agree	Yes	Yes	Yes	Yes	Yes	Yes	Yes
954	Female	21-30	Highier education (avobe bachelor)	Married	Housewife	Nuclear	<5	>30,000	Rural area	More accurate	More Positive	More frequent	No	No	Yes	Yes	No	No	Agree	Agree	Agree	Agree	Agree	Agree	Yes	Yes	Yes	Yes	Yes	Yes	Yes
955	Female	21-30	Bachelor	Married	Housewife	Nuclear	<5	>30,000	Rural area	More accurate	More Positive	More frequent	Yes	Yes	Yes	Yes	No	No	Agree	Agree	Agree	Agree	Agree	Agree	Yes	Yes	Sometimes	Yes	Yes	Yes	Yes
956	Female	21-30	Highier education (avobe bachelor)	Married	Non-govt. empolyee	Nuclear	<5	>30,000	Rural area	More accurate	More Positive	More frequent	Yes	No	Yes	Yes	No	No	Agree	Agree	Agree	Agree	Agree	Agree	Yes	Yes	Yes	Yes	Yes	Yes	Yes
957	Female	21-30	Highier education (avobe bachelor)	Married	Student	Nuclear	<5	>30,000	Rural area	More accurate	More Positive	More frequent	Yes	No	Yes	Yes	No	No	Agree	Agree	Agree	Agree	Agree	Agree	Yes	Yes	Yes	Yes	No	Yes	Yes
958	Female	21-30	Highier education (avobe bachelor)	Married	Govt. employee	Nuclear	<5	>30,000	Rural area	More accurate	More Positive	More frequent	Don't know	No	Yes	Yes	Yes	No	Agree	Agree	Agree	Agree	Agree	Agree	Yes	Yes	Yes	Yes	No	Yes	Yes
959	Female	21-30	Highier education (avobe bachelor)	Married	Housewife	Nuclear	<5	>30,000	Rural area	More accurate	More Positive	More frequent	Yes	Yes	Yes	Yes	No	No	Agree	Agree	Agree	Agree	Agree	Agree	Yes	Yes	Yes	Yes	Yes	Yes	Yes
960	Female	21-30	Highier education (avobe bachelor)	Married	Non-govt. empolyee	Nuclear	<5	>30,000	Urban area	More accurate	More Positive	More frequent	Yes	Yes	Yes	Yes	Yes	No	Agree	Agree	Agree	Agree	Agree	Agree	Yes	Yes	Sometimes	Yes	Yes	Yes	Yes
961	Male	21-30	Bachelor	Single	Student	Join	≥5	>30,000	Rural area	More accurate	More Positive	More frequent	Yes	No	Yes	Yes	No	No	Agree	Agree	Agree	Agree	Agree	Agree	Yes	Yes	Yes	Yes	Yes	Yes	Yes
962	Male	21-30	Highier education (avobe bachelor)	Single	Non-govt. empolyee	Join	≥5	>30,000	Rural area	Less accurate	More Positive	More frequent	Yes	Yes	Yes	Yes	Don't know	Don't know	Agree	Agree	Agree	Agree	Agree	Agree	Yes	Yes	Yes	Yes	No	Yes	Yes
963	Male	>30	Highier education (avobe bachelor)	Single	Non-govt. empolyee	Join	<5	>30,000	Rural area	More accurate	More Positive	More frequent	Yes	No	Yes	Yes	Yes	No	Agree	Agree	Agree	Agree	Agree	Agree	Yes	Yes	Sometimes	Yes	Yes	Yes	Yes
964	Male	21-30	Bachelor	Single	Student	Join	≥5	>30,000	Urban area	More accurate	More Positive	More frequent	Yes	Yes	Yes	Yes	No	No	Agree	Agree	Agree	Agree	Agree	Agree	Yes	Yes	Sometimes	Yes	Yes	Yes	Yes
965	Male	21-30	Bachelor	Single	Businessman	Join	<5	>30,000	Rural area	More accurate	More Positive	More frequent	Yes	No	Yes	Yes	No	No	Agree	Agree	Agree	Agree	Undecided	Agree	Yes	Yes	Yes	Yes	Yes	Yes	Yes
966	Male	21-30	Bachelor	Single	Non-govt. empolyee	Join	<5	>30,000	Rural area	More accurate	More Positive	More frequent	Yes	No	Yes	Yes	Yes	No	Agree	Agree	Agree	Agree	Agree	Agree	Yes	Yes	Yes	Yes	No	Yes	Yes
967	Male	21-30	Bachelor	Single	Student	Join	≥5	>30,000	Urban area	Less accurate	More Positive	More frequent	Yes	Yes	Yes	Yes	Don't know	Don't know	Agree	Agree	Agree	Agree	Undecided	Agree	Yes	Yes	Yes	Yes	No	Yes	Yes
968	Male	21-30	Bachelor	Single	Student	Join	≥5	>30,000	Urban area	More accurate	More Positive	More frequent	Yes	Yes	Yes	Yes	No	No	Agree	Agree	Agree	Agree	Agree	Agree	Yes	Yes	Yes	Yes	Yes	Yes	Yes
969	Male	12-20	Intermediate (11-12)	Single	Student	Join	<5	>30,000	Urban area	Less accurate	More Positive	More frequent	Yes	Yes	Yes	Yes	Don't know	Don't know	Agree	Agree	Agree	Agree	Undecided	Agree	Yes	Yes	Yes	Yes	No	Yes	Yes
970	Male	21-30	Bachelor	Single	Student	Join	≥5	>30,000	Urban area	More accurate	More Positive	More frequent	Yes	Yes	Yes	Yes	Yes	No	Agree	Agree	Agree	Agree	Agree	Agree	Yes	Yes	Yes	Yes	Yes	Yes	Yes
971	Male	12-20	Bachelor	Single	Student	Join	≥5	>30,000	Rural area	More accurate	More Positive	More frequent	Yes	No	Yes	Yes	Yes	No	Agree	Agree	Agree	Agree	Agree	Agree	Yes	Yes	Yes	Yes	Yes	Yes	Yes
972	Male	>30	Bachelor	Single	Govt. employee	Join	≥5	>30,000	Rural area	More accurate	More Positive	More frequent	Yes	No	Yes	Yes	Yes	No	Agree	Agree	Agree	Agree	Agree	Agree	Yes	Yes	Yes	Yes	Yes	Yes	Yes
973	Male	21-30	Bachelor	Single	Govt. employee	Join	<5	>30,000	Urban area	More accurate	More Positive	More frequent	Yes	No	Yes	Yes	Yes	No	Agree	Agree	Agree	Agree	Agree	Agree	Yes	Yes	Yes	Yes	Yes	Yes	Yes
974	Male	21-30	Highier education (avobe bachelor)	Single	Non-govt. empolyee	Join	≥5	>30,000	Rural area	More accurate	More Positive	More frequent	Yes	No	Yes	Yes	No	No	Agree	Agree	Agree	Agree	Agree	Agree	Yes	Yes	Yes	Yes	No	Yes	Yes
975	Male	>30	Highier education (avobe bachelor)	Single	Non-govt. empolyee	Join	≥5	>30,000	Urban area	Less accurate	More Positive	More frequent	No	Yes	Yes	Yes	No	No	Agree	Agree	Agree	Agree	Agree	Agree	Yes	Yes	Yes	Yes	No	Yes	Yes
976	Male	21-30	Highier education (avobe bachelor)	Single	Student	Join	≥5	>30,000	Urban area	More accurate	More Positive	More frequent	Yes	No	Yes	Yes	Yes	No	Agree	Agree	Agree	Agree	Agree	Agree	Yes	Yes	Yes	Yes	Yes	Yes	Yes
977	Male	21-30	Highier education (avobe bachelor)	Single	Non-govt. empolyee	Join	<5	>30,000	Urban area	More accurate	More Positive	More frequent	Yes	No	Yes	Yes	No	No	Agree	Agree	Agree	Agree	Agree	Agree	Yes	Yes	Yes	Yes	Yes	Yes	Yes
978	Male	21-30	Highier education (avobe bachelor)	Single	Businessman	Join	≥5	>30,000	Rural area	More accurate	More Positive	More frequent	Yes	Yes	Yes	Yes	No	No	Agree	Agree	Agree	Agree	Agree	Agree	Yes	Yes	Yes	Yes	No	Yes	Yes
979	Male	21-30	Highier education (avobe bachelor)	Single	Non-govt. empolyee	Join	≥5	>30,000	Rural area	More accurate	More Positive	More frequent	Yes	Yes	Yes	Yes	Yes	No	Agree	Agree	Agree	Agree	Agree	Agree	Yes	Yes	Yes	Yes	Yes	Yes	Yes
980	Male	21-30	Highier education (avobe bachelor)	Single	Govt. employee	Join	<5	>30,000	Urban area	More accurate	More Positive	More frequent	Yes	No	Yes	Yes	No	No	Agree	Agree	Agree	Agree	Agree	Agree	Yes	Yes	Sometimes	Yes	Yes	Yes	Yes
981	Male	21-30	Bachelor	Single	Non-govt. empolyee	Join	≥5	>30,000	Urban area	More accurate	More Positive	More frequent	Yes	Yes	Yes	Yes	No	No	Agree	Agree	Agree	Agree	Agree	Agree	Yes	Yes	Yes	Yes	No	Yes	Yes
982	Female	21-30	Highier education (avobe bachelor)	Single	Student	Join	≥5	>30,000	Rural area	More accurate	More Positive	More frequent	Yes	No	Yes	Yes	No	No	Agree	Agree	Agree	Agree	Agree	Agree	Yes	Yes	Yes	Yes	Yes	Yes	Yes
983	Female	12-20	Bachelor	Single	Student	Join	≥5	>30,000	Urban area	More accurate	More Positive	More frequent	Yes	Yes	Yes	Yes	No	No	Agree	Agree	Agree	Agree	Undecided	Agree	Yes	Yes	Yes	Yes	No	Yes	Yes
984	Female	21-30	Bachelor	Single	Student	Join	≥5	>30,000	Rural area	More accurate	More Positive	More frequent	Yes	Yes	Yes	Yes	Yes	No	Agree	Agree	Agree	Agree	Agree	Agree	Sometimes	Yes	Yes	Yes	Yes	Yes	Yes
985	Female	12-20	Bachelor	Single	Student	Join	≥5	>30,000	Rural area	More accurate	More Positive	More frequent	Yes	Yes	Yes	Yes	No	No	Agree	Agree	Agree	Agree	Agree	Agree	Yes	Yes	Yes	Yes	Yes	Yes	Yes
986	Female	12-20	Bachelor	Single	Student	Join	≥5	>30,000	Rural area	More accurate	More Positive	More frequent	Yes	No	Yes	Yes	Don't know	Don't know	Agree	Agree	Agree	Agree	Agree	Agree	Yes	Yes	Yes	Yes	Yes	Yes	Yes
987	Female	21-30	Highier education (avobe bachelor)	Single	Govt. employee	Join	<5	>30,000	Rural area	More accurate	More Positive	More frequent	Yes	No	Yes	Yes	Don't know	No	Agree	Agree	Agree	Agree	Agree	Agree	Yes	Yes	Yes	Yes	Yes	Yes	Yes
988	Female	21-30	Highier education (avobe bachelor)	Single	Govt. employee	Join	≥5	>30,000	Rural area	More accurate	More Positive	More frequent	Yes	Yes	Yes	Yes	Yes	No	Agree	Agree	Agree	Agree	Agree	Agree	Yes	Yes	Sometimes	Yes	Yes	Yes	Yes
989	Male	21-30	Bachelor	Married	Non-govt. empolyee	Join	<5	>30,000	Rural area	More accurate	More Positive	More frequent	Yes	No	Yes	Yes	Yes	No	Agree	Agree	Agree	Agree	Agree	Agree	Sometimes	Yes	Yes	Yes	Yes	Yes	Yes
990	Male	>30	Highier education (avobe bachelor)	Married	Businessman	Join	≥5	>30,000	Rural area	More accurate	More Positive	More frequent	Yes	Yes	Yes	Yes	Yes	No	Agree	Agree	Agree	Agree	Agree	Agree	Yes	Yes	Yes	Yes	Yes	Yes	Yes
991	Male	>30	Highier education (avobe bachelor)	Married	Govt. employee	Join	≥5	>30,000	Urban area	More accurate	More Positive	More frequent	Yes	Yes	Yes	Yes	Yes	No	Agree	Agree	Agree	Agree	Agree	Agree	Yes	Yes	Yes	Yes	No	Yes	Yes
992	Male	>30	Highier education (avobe bachelor)	Married	Govt. employee	Join	≥5	>30,000	Urban area	More accurate	More Positive	More frequent	Yes	Yes	Yes	Yes	Yes	No	Agree	Agree	Agree	Agree	Agree	Agree	Yes	Yes	Sometimes	Yes	Yes	Yes	Yes
993	Male	>30	Highier education (avobe bachelor)	Married	Non-govt. empolyee	Join	≥5	>30,000	Rural area	More accurate	More Positive	More frequent	Yes	Yes	Yes	Yes	No	No	Agree	Agree	Agree	Agree	Agree	Agree	Yes	Yes	Yes	Yes	No	Yes	Yes
994	Male	21-30	Highier education (avobe bachelor)	Married	Govt. employee	Join	≥5	>30,000	Rural area	More accurate	More Positive	More frequent	Yes	Yes	Yes	Yes	Yes	No	Agree	Agree	Agree	Agree	Agree	Agree	Yes	Yes	Yes	Yes	No	Yes	Yes
995	Male	>30	Highier education (avobe bachelor)	Married	Govt. employee	Join	<5	>30,000	Urban area	More accurate	More Positive	More frequent	Yes	Yes	Yes	Yes	Don't know	No	Agree	Agree	Agree	Agree	Agree	Agree	Yes	Yes	Yes	Yes	Yes	Yes	Yes
996	Male	>30	Highier education (avobe bachelor)	Married	Govt. employee	Join	≥5	>30,000	Rural area	More accurate	More Positive	More frequent	Yes	Yes	Yes	Yes	No	No	Agree	Agree	Agree	Agree	Agree	Agree	Yes	Yes	Yes	Yes	No	Yes	Yes
997	Male	>30	Highier education (avobe bachelor)	Married	Govt. employee	Join	≥5	>30,000	Rural area	More accurate	More Positive	More frequent	Yes	Yes	Yes	Yes	No	No	Agree	Agree	Agree	Agree	Agree	Agree	Yes	Yes	Yes	Yes	No	Yes	Yes
998	Male	21-30	Highier education (avobe bachelor)	Married	Non-govt. empolyee	Join	<5	>30,000	Rural area	More accurate	More Positive	More frequent	Yes	No	Yes	Yes	No	No	Agree	Agree	Agree	Agree	Agree	Agree	Yes	Yes	No	Yes	Yes	Yes	Yes
999	Male	21-30	Highier education (avobe bachelor)	Married	Govt. employee	Join	<5	>30,000	Rural area	More accurate	More Positive	More frequent	Yes	No	Yes	Yes	No	No	Agree	Agree	Agree	Agree	Agree	Agree	Sometimes	Yes	Yes	Yes	Yes	Yes	Yes
1000	Male	>30	Highier education (avobe bachelor)	Married	Non-govt. empolyee	Join	≥5	>30,000	Rural area	More accurate	More Positive	More frequent	Yes	Yes	Yes	Yes	No	No	Agree	Agree	Agree	Agree	Agree	Agree	Yes	Yes	Yes	Yes	Yes	Yes	Yes
1001	Male	>30	Bachelor	Married	Non-govt. empolyee	Join	≥5	>30,000	Rural area	More accurate	More Positive	More frequent	Yes	No	Yes	Yes	Yes	No	Agree	Agree	Agree	Agree	Agree	Agree	Yes	Yes	Yes	Yes	Yes	Yes	Yes
1002	Male	21-30	Highier education (avobe bachelor)	Married	Non-govt. empolyee	Join	≥5	>30,000	Rural area	More accurate	More Positive	More frequent	Yes	No	Yes	Yes	Yes	No	Agree	Agree	Agree	Agree	Agree	Agree	Yes	Yes	Yes	Yes	Yes	Yes	Yes
1003	Male	21-30	Bachelor	Married	Non-govt. empolyee	Join	<5	>30,000	Rural area	More accurate	More Positive	More frequent	Yes	Don't know	Yes	Yes	Don't know	No	Agree	Agree	Agree	Undecided	Agree	Agree	Yes	Yes	Yes	Yes	No	Yes	Yes
1004	Female	12-20	Bachelor	Married	Student	Join	<5	>30,000	Urban area	More accurate	More Positive	More frequent	Yes	Yes	Yes	Yes	No	No	Agree	Agree	Agree	Agree	Agree	Agree	Yes	Yes	Yes	Yes	No	Yes	Yes
1005	Female	21-30	Highier education (avobe bachelor)	Married	Non-govt. empolyee	Join	≥5	>30,000	Rural area	More accurate	More Positive	More frequent	Yes	Yes	Yes	Yes	No	No	Agree	Agree	Agree	Agree	Agree	Agree	Yes	Yes	Yes	Yes	No	Yes	Yes
1006	Female	21-30	Bachelor	Married	Housewife	Join	≥5	>30,000	Rural area	More accurate	More Positive	More frequent	Yes	Yes	Yes	Yes	Yes	Yes	Agree	Agree	Agree	Agree	Agree	Agree	Yes	Yes	No	Yes	Yes	Yes	Yes
1007	Female	21-30	Highier education (avobe bachelor)	Married	Housewife	Join	<5	>30,000	Rural area	More accurate	More Positive	More frequent	Yes	No	Yes	Yes	No	No	Agree	Agree	Agree	Agree	Agree	Agree	Sometimes	Yes	Yes	Yes	Yes	Yes	Yes
1008	Female	21-30	Highier education (avobe bachelor)	Married	Housewife	Join	≥5	>30,000	Rural area	More accurate	More Positive	More frequent	Yes	No	Yes	Yes	Yes	No	Agree	Agree	Agree	Agree	Agree	Agree	Yes	Yes	Yes	Yes	Yes	Yes	Yes
1009	Female	21-30	Highier education (avobe bachelor)	Married	Housewife	Join	<5	>30,000	Rural area	More accurate	More Positive	More frequent	Yes	Don't know	Yes	Yes	Yes	No	Agree	Agree	Agree	Agree	Agree	Agree	Yes	Yes	Sometimes	Yes	Yes	Yes	Yes
1010	Female	21-30	Highier education (avobe bachelor)	Married	Housewife	Join	<5	>30,000	Rural area	More accurate	More Positive	More frequent	Yes	No	Yes	Yes	No	No	Agree	Agree	Agree	Agree	Agree	Agree	Yes	Yes	Yes	Yes	Yes	Yes	Yes
1011	Female	>30	Highier education (avobe bachelor)	Married	Housewife	Join	≥5	>30,000	Rural area	More accurate	More Positive	More frequent	Yes	No	Yes	Yes	No	No	Agree	Agree	Agree	Agree	Agree	Agree	Yes	Yes	Yes	Yes	Yes	Yes	Yes
1012	Male	>30	Bachelor	Divorced	Businessman	Join	≥5	>30,000	Urban area	More accurate	More Positive	More frequent	Yes	Yes	Yes	Yes	Yes	Yes	Agree	Agree	Agree	Agree	Agree	Agree	Yes	Yes	Yes	Yes	Yes	Yes	Yes
1013	Male	21-30	Highier education (avobe bachelor)	Divorced	Non-govt. empolyee	Join	<5	>30,000	Rural area	More accurate	More Positive	More frequent	Yes	No	Yes	Yes	No	Yes	Agree	Agree	Agree	Agree	Agree	Agree	Yes	Yes	Yes	Yes	No	Yes	Yes
1014	Male	12-20	Bachelor	Single	Student	Nuclear	≥5	<20,000	Urban area	Less accurate	Less Positive	Less frequent	Yes	Yes	No	No	No	No	Agree	Agree	Agree	Agree	Undecided	Undecided	Yes	Yes	Yes	Yes	No	No	Yes
1015	Male	21-30	Highier education (avobe bachelor)	Single	Student	Nuclear	<5	<20,000	Urban area	Less accurate	Less Positive	Less frequent	Yes	Yes	No	No	No	No	Agree	Agree	Agree	Agree	Disagree	Agree	Yes	Yes	Yes	No	No	Yes	No
1016	Male	12-20	Intermediate (11-12)	Single	Student	Nuclear	<5	<20,000	Urban area	Less accurate	Less Positive	Less frequent	Yes	Yes	No	No	No	No	Agree	Agree	Agree	Agree	Disagree	Agree	Sometimes	Yes	Sometimes	Yes	No	Yes	Yes
1017	Male	21-30	Intermediate (11-12)	Single	Student	Nuclear	≥5	<20,000	Urban area	Less accurate	Less Positive	Less frequent	Yes	Yes	No	No	No	No	Agree	Agree	Agree	Disagree	Agree	Agree	Yes	Yes	Yes	Sometimes	No	Yes	Sometimes
1018	Male	12-20	Bachelor	Single	Student	Nuclear	<5	<20,000	Urban area	Less accurate	Less Positive	Less frequent	Yes	Yes	No	No	Don't know	No	Agree	Agree	Agree	Agree	Disagree	Agree	Yes	Yes	Yes	No	No	Yes	Yes
1019	Male	12-20	Bachelor	Single	Student	Nuclear	≥5	<20,000	Urban area	Less accurate	Less Positive	Less frequent	Yes	Yes	No	No	No	No	Agree	Disagree	Agree	Agree	Agree	Agree	Sometimes	Yes	Sometimes	Yes	No	Yes	Sometimes
1020	Male	21-30	Bachelor	Single	Student	Nuclear	<5	<20,000	Rural area	Less accurate	Less Positive	Less frequent	Yes	Yes	No	No	No	No	Agree	Agree	Agree	Agree	Disagree	Agree	Sometimes	Yes	No	Yes	No	Yes	Yes
1021	Male	21-30	Bachelor	Single	Student	Nuclear	<5	<20,000	Urban area	Less accurate	Less Positive	Less frequent	Yes	Yes	No	No	No	No	Agree	Agree	Agree	Agree	Disagree	Agree	No	Yes	Sometimes	Yes	No	Yes	Sometimes
1022	Male	21-30	Highier education (avobe bachelor)	Single	Student	Nuclear	<5	<20,000	Urban area	More accurate	Less Positive	Less frequent	Yes	No	No	No	Yes	No	Agree	Agree	Agree	Agree	Disagree	Agree	Sometimes	Yes	Yes	Yes	Yes	Sometimes	Sometimes
1023	Male	12-20	Bachelor	Single	Student	Nuclear	<5	<20,000	Urban area	Less accurate	Less Positive	Less frequent	Yes	Yes	No	No	No	No	Agree	Agree	Agree	Undecided	Undecided	Agree	Sometimes	Yes	No	Yes	No	Yes	Yes
1024	Female	21-30	Bachelor	Single	Student	Nuclear	≥5	<20,000	Urban area	Less accurate	Less Positive	Less frequent	Yes	Yes	No	No	No	No	Agree	Agree	Agree	Agree	Disagree	Agree	Yes	Yes	Yes	Sometimes	No	Yes	Yes
1025	Female	12-20	Bachelor	Single	Student	Nuclear	<5	<20,000	Rural area	Less accurate	Less Positive	Less frequent	Yes	Yes	No	No	No	No	Agree	Agree	Agree	Agree	Disagree	Agree	Yes	Yes	Yes	Sometimes	No	Yes	Yes
1026	Female	21-30	Intermediate (11-12)	Single	Student	Nuclear	<5	<20,000	Rural area	Less accurate	Less Positive	Less frequent	Yes	Yes	No	No	No	No	Agree	Agree	Agree	Agree	Disagree	Agree	Sometimes	Yes	Sometimes	Yes	No	Yes	Yes
1027	Female	21-30	Bachelor	Single	Student	Nuclear	<5	<20,000	Rural area	Less accurate	Less Positive	Less frequent	Yes	Yes	No	No	No	No	Agree	Agree	Agree	Agree	Disagree	Agree	Yes	Yes	Sometimes	Sometimes	No	Sometimes	Yes
1028	Male	21-30	Bachelor	Married	Student	Nuclear	≥5	<20,000	Urban area	Less accurate	Less Positive	Less frequent	Yes	Yes	No	No	Yes	No	Agree	Agree	Agree	Agree	Disagree	Agree	Yes	Yes	Sometimes	Sometimes	Yes	Sometimes	Yes
1029	Male	12-20	Bachelor	Single	Student	Join	≥5	<20,000	Urban area	Less accurate	Less Positive	Less frequent	Yes	No	No	No	No	Yes	Agree	Agree	Agree	Agree	Disagree	Agree	Yes	Yes	Sometimes	Yes	No	Yes	Yes
1030	Male	21-30	Bachelor	Single	Student	Join	≥5	<20,000	Urban area	Less accurate	Less Positive	Less frequent	Yes	Yes	No	No	No	No	Agree	Agree	Agree	Agree	Disagree	Agree	Yes	Yes	Sometimes	Sometimes	No	Sometimes	Sometimes
1031	Male	21-30	Highier education (avobe bachelor)	Single	Student	Join	<5	<20,000	Rural area	Less accurate	Less Positive	Less frequent	Yes	Yes	No	No	No	No	Agree	Agree	Agree	Agree	Disagree	Agree	Yes	Yes	Sometimes	Sometimes	No	Yes	Sometimes
1032	Male	21-30	Bachelor	Married	Student	Join	≥5	<20,000	Rural area	Less accurate	Less Positive	Less frequent	Yes	Yes	No	No	No	No	Agree	Agree	Agree	Agree	Disagree	Agree	Yes	Yes	Yes	Yes	No	Sometimes	Sometimes
1033	Male	12-20	Bachelor	Single	Student	Nuclear	<5	20,000-30,000	Rural area	Less accurate	Less Positive	Less frequent	Yes	Yes	No	No	No	No	Agree	Agree	Agree	Agree	Disagree	Agree	Sometimes	Yes	Sometimes	Yes	No	Sometimes	Yes
1034	Male	12-20	Bachelor	Single	Student	Nuclear	<5	20,000-30,000	Urban area	Less accurate	Less Positive	Less frequent	Yes	Yes	No	No	No	No	Agree	Agree	Agree	Disagree	Agree	Agree	Yes	Yes	Yes	Yes	No	Sometimes	Yes
1035	Male	21-30	Bachelor	Single	Student	Nuclear	<5	20,000-30,000	Rural area	Less accurate	Less Positive	Less frequent	Yes	Yes	No	No	No	No	Agree	Agree	Agree	Disagree	Agree	Agree	Sometimes	Yes	Sometimes	Yes	Yes	Sometimes	Yes
1036	Male	12-20	Bachelor	Single	Student	Nuclear	<5	20,000-30,000	Urban area	Less accurate	Less Positive	Less frequent	Yes	Yes	No	No	Yes	No	Agree	Agree	Agree	Agree	Disagree	Agree	Yes	Yes	Yes	Yes	No	Sometimes	Yes
1037	Male	12-20	Bachelor	Single	Student	Nuclear	<5	20,000-30,000	Rural area	Less accurate	Less Positive	Less frequent	Yes	Yes	No	No	No	No	Agree	Agree	Agree	Agree	Disagree	Agree	Yes	Yes	Sometimes	Yes	No	Sometimes	Yes
1038	Male	12-20	Bachelor	Single	Student	Nuclear	<5	20,000-30,000	Rural area	Less accurate	Less Positive	Less frequent	Yes	Yes	No	No	Yes	No	Agree	Agree	Agree	Agree	Agree	Disagree	Sometimes	Yes	Sometimes	Yes	No	Yes	Yes
1039	Female	21-30	Bachelor	Single	Student	Nuclear	<5	20,000-30,000	Rural area	Less accurate	Less Positive	Less frequent	Yes	Yes	No	No	No	No	Agree	Agree	Agree	Agree	Disagree	Agree	Yes	Yes	Sometimes	Yes	No	Yes	Yes
1040	Female	12-20	Bachelor	Single	Student	Nuclear	<5	20,000-30,000	Rural area	Less accurate	Less Positive	Less frequent	Yes	Yes	No	No	Yes	No	Agree	Agree	Agree	Disagree	Disagree	Agree	Sometimes	Yes	Yes	Yes	No	Yes	Yes
1041	Female	12-20	Bachelor	Single	Student	Nuclear	<5	20,000-30,000	Rural area	Less accurate	Less Positive	Less frequent	Yes	Yes	No	No	No	No	Agree	Agree	Agree	Undecided	Disagree	Agree	Yes	Yes	Sometimes	Yes	No	Sometimes	Yes
1042	Female	21-30	Bachelor	Single	Student	Nuclear	<5	20,000-30,000	Urban area	Less accurate	Less Positive	Less frequent	Yes	Yes	No	No	Yes	No	Agree	Agree	Agree	Agree	Disagree	Agree	Sometimes	Yes	No	Yes	No	Yes	Yes
1043	Female	21-30	Bachelor	Single	Student	Nuclear	<5	20,000-30,000	Urban area	Less accurate	Less Positive	Less frequent	Yes	Yes	No	No	No	No	Agree	Agree	Agree	Disagree	Agree	Agree	Yes	Yes	Sometimes	Yes	No	Yes	Yes
1044	Female	21-30	Bachelor	Single	Student	Nuclear	<5	20,000-30,000	Rural area	Less accurate	Less Positive	Less frequent	Yes	Yes	No	No	Don't know	No	Agree	Agree	Agree	Disagree	Undecided	Agree	Yes	Yes	No	Yes	No	Sometimes	Yes
1045	Female	12-20	Bachelor	Single	Student	Nuclear	<5	20,000-30,000	Rural area	Less accurate	Less Positive	Less frequent	Yes	Yes	No	No	No	No	Agree	Agree	Agree	Agree	Disagree	Agree	Yes	Yes	No	Yes	No	Yes	Yes
1046	Female	12-20	Bachelor	Single	Student	Nuclear	<5	20,000-30,000	Urban area	Less accurate	Less Positive	Less frequent	Yes	Yes	No	No	Yes	No	Agree	Agree	Agree	Agree	Disagree	Agree	Sometimes	Yes	Sometimes	Yes	No	Yes	Yes
1047	Female	12-20	Bachelor	Single	Student	Nuclear	<5	20,000-30,000	Urban area	Less accurate	Less Positive	Less frequent	Don't know	Yes	No	No	No	No	Agree	Agree	Agree	Undecided	Agree	Undecided	Sometimes	Yes	Sometimes	Yes	No	Sometimes	Yes
1048	Female	21-30	Bachelor	Single	Student	Nuclear	<5	20,000-30,000	Rural area	Less accurate	Less Positive	Less frequent	Yes	Yes	No	No	Yes	No	Agree	Agree	Agree	Agree	Disagree	Agree	Yes	Yes	Sometimes	Yes	No	Yes	Yes
1049	Female	12-20	Bachelor	Single	Student	Nuclear	<5	20,000-30,000	Rural area	Less accurate	Less Positive	Less frequent	Yes	Yes	No	No	Yes	No	Agree	Agree	Agree	Disagree	Agree	Agree	Yes	Yes	Sometimes	Yes	No	Yes	Yes
1050	Female	21-30	Bachelor	Single	Student	Nuclear	<5	20,000-30,000	Rural area	Less accurate	Less Positive	Less frequent	Yes	Yes	No	No	No	No	Agree	Agree	Agree	Agree	Disagree	Agree	Yes	Yes	Sometimes	Yes	No	Yes	Yes
1051	Female	21-30	Bachelor	Single	Student	Nuclear	<5	20,000-30,000	Rural area	Less accurate	Less Positive	Less frequent	Yes	Yes	No	No	Don't know	No	Agree	Agree	Agree	Agree	Disagree	Agree	Yes	Yes	Sometimes	Yes	No	Yes	Yes
1052	Male	>30	Highier education (avobe bachelor)	Married	Businessman	Nuclear	<5	20,000-30,000	Rural area	Less accurate	Less Positive	Less frequent	Yes	Yes	No	No	Don't know	Don't know	Disagree	Agree	Agree	Agree	Undecided	Undecided	Yes	Yes	Sometimes	Yes	No	Sometimes	Yes
1053	Male	12-20	Bachelor	Single	Student	Join	≥5	20,000-30,000	Rural area	Less accurate	Less Positive	Less frequent	Yes	Don't know	No	No	No	No	Agree	Agree	Agree	Agree	Disagree	Agree	No	Yes	No	Sometimes	No	Yes	Sometimes
1054	Male	12-20	Bachelor	Single	Student	Nuclear	<5	>30,000	Rural area	Less accurate	Less Positive	Less frequent	Yes	Yes	No	No	No	No	Agree	Agree	Agree	Undecided	Disagree	Agree	Sometimes	Yes	Sometimes	Yes	Yes	Yes	Yes
1055	Male	21-30	Highier education (avobe bachelor)	Single	Unemployment	Nuclear	≥5	>30,000	Rural area	Less accurate	Less Positive	Less frequent	Yes	Yes	No	No	No	No	Agree	Agree	Agree	Agree	Disagree	Agree	Sometimes	Yes	Yes	Yes	No	Yes	Yes
1056	Male	21-30	Highier education (avobe bachelor)	Single	Govt. employee	Nuclear	<5	>30,000	Urban area	Less accurate	Less Positive	Less frequent	Yes	Yes	No	No	No	No	Agree	Agree	Agree	Agree	Disagree	Agree	Yes	Yes	Yes	Yes	No	Sometimes	Yes
1057	Male	21-30	Bachelor	Single	Student	Nuclear	<5	>30,000	Urban area	Less accurate	Less Positive	Less frequent	Yes	Yes	No	No	No	No	Agree	Agree	Agree	Agree	Disagree	Agree	Yes	Yes	No	Yes	Yes	Yes	No
1058	Male	21-30	Highier education (avobe bachelor)	Single	Non-govt. empolyee	Nuclear	<5	>30,000	Rural area	Less accurate	Less Positive	Less frequent	Yes	Yes	No	No	No	No	Agree	Agree	Agree	Disagree	Agree	Agree	Sometimes	Yes	No	Yes	No	Yes	Yes
1059	Male	21-30	Highier education (avobe bachelor)	Single	Non-govt. empolyee	Nuclear	<5	>30,000	Rural area	Less accurate	Less Positive	Less frequent	Yes	Yes	No	No	No	No	Agree	Agree	Agree	Agree	Disagree	Agree	Sometimes	Yes	Sometimes	Sometimes	No	No	Sometimes
1060	Male	12-20	Bachelor	Single	Student	Nuclear	<5	>30,000	Rural area	Less accurate	Less Positive	Less frequent	Yes	No	No	No	Don't know	No	Agree	Disagree	Agree	Agree	Disagree	Agree	Yes	Yes	Yes	No	No	Yes	Sometimes
1061	Male	21-30	Bachelor	Single	Student	Nuclear	<5	>30,000	Rural area	Less accurate	Less Positive	Less frequent	Yes	Yes	No	No	No	No	Agree	Agree	Agree	Agree	Disagree	Agree	Yes	Yes	Yes	Yes	No	Sometimes	Yes
1062	Male	12-20	Bachelor	Single	Student	Nuclear	≥5	>30,000	Rural area	Less accurate	Less Positive	Less frequent	Yes	Yes	No	No	Don't know	No	Agree	Agree	Agree	Agree	Disagree	Agree	Sometimes	Yes	Sometimes	Yes	No	Yes	Yes
1063	Male	21-30	Bachelor	Single	Non-govt. empolyee	Nuclear	≥5	>30,000	Urban area	Less accurate	Less Positive	Less frequent	Yes	Yes	No	No	No	No	Agree	Agree	Agree	Agree	Disagree	Agree	Yes	Yes	No	Yes	No	Yes	Yes
1064	Male	21-30	Bachelor	Single	Student	Nuclear	≥5	>30,000	Rural area	More accurate	Less Positive	Less frequent	Yes	No	No	No	Yes	No	Agree	Agree	Agree	Disagree	Undecided	Agree	No	Yes	No	Yes	Yes	Yes	Yes
1065	Male	12-20	Intermediate (11-12)	Single	Student	Nuclear	<5	>30,000	Rural area	Less accurate	Less Positive	Less frequent	Yes	Yes	No	No	Yes	No	Agree	Agree	Agree	Agree	Agree	Disagree	Yes	Yes	Yes	Yes	No	Sometimes	Yes
1066	Male	12-20	Intermediate (11-12)	Single	Student	Nuclear	<5	>30,000	Rural area	Less accurate	Less Positive	Less frequent	Yes	Yes	No	No	No	No	Agree	Agree	Agree	Agree	Disagree	Agree	Yes	Yes	Yes	Yes	No	Sometimes	Sometimes
1067	Male	21-30	Bachelor	Single	Student	Nuclear	<5	>30,000	Rural area	Less accurate	Less Positive	Less frequent	Yes	Yes	No	No	No	No	Agree	Agree	Agree	Agree	Disagree	Agree	Yes	Yes	Sometimes	Yes	No	Yes	Yes
1068	Male	21-30	Bachelor	Single	Student	Nuclear	<5	>30,000	Rural area	Less accurate	Less Positive	Less frequent	Yes	Yes	No	No	No	No	Agree	Agree	Agree	Agree	Disagree	Agree	Yes	Yes	Sometimes	Yes	No	Yes	Yes
1069	Male	12-20	Bachelor	Single	Student	Nuclear	<5	>30,000	Rural area	Less accurate	Less Positive	Less frequent	Yes	Yes	No	No	Yes	No	Agree	Agree	Agree	Agree	Disagree	Agree	Sometimes	Yes	Yes	Yes	No	Yes	Yes
1070	Male	21-30	Bachelor	Single	Student	Nuclear	<5	>30,000	Rural area	Less accurate	Less Positive	Less frequent	Yes	Yes	No	No	No	No	Agree	Agree	Agree	Agree	Disagree	Agree	Yes	Yes	Sometimes	Yes	No	Sometimes	Yes
1071	Male	21-30	Bachelor	Single	Student	Nuclear	≥5	>30,000	Rural area	Less accurate	Less Positive	Less frequent	Yes	Yes	No	No	No	No	Disagree	Disagree	Agree	Agree	Agree	Agree	No	Yes	Sometimes	Yes	No	Sometimes	Sometimes
1072	Male	21-30	Bachelor	Single	Non-govt. empolyee	Nuclear	≥5	>30,000	Rural area	Less accurate	Less Positive	Less frequent	Yes	Yes	No	No	Yes	Don't know	Agree	Agree	Agree	Agree	Disagree	Agree	Yes	Yes	Sometimes	Yes	No	Yes	Yes
1073	Female	12-20	Bachelor	Single	Student	Nuclear	<5	>30,000	Rural area	Less accurate	Less Positive	Less frequent	Yes	Yes	No	No	No	No	Agree	Agree	Agree	Agree	Disagree	Agree	Sometimes	Yes	Yes	Yes	No	Yes	Yes
1074	Female	21-30	Highier education (avobe bachelor)	Single	Student	Nuclear	<5	>30,000	Rural area	Less accurate	Less Positive	Less frequent	Yes	Yes	No	No	No	No	Agree	Agree	Agree	Agree	Disagree	Agree	Yes	Yes	Sometimes	Sometimes	No	Sometimes	Yes
1075	Female	12-20	Bachelor	Single	Student	Nuclear	<5	>30,000	Rural area	Less accurate	Less Positive	Less frequent	Yes	Yes	No	No	Yes	No	Agree	Agree	Agree	Agree	Disagree	Agree	Yes	Yes	Sometimes	Yes	No	Yes	Yes
1076	Female	12-20	Bachelor	Single	Student	Nuclear	<5	>30,000	Rural area	Less accurate	Less Positive	Less frequent	Yes	No	No	No	No	No	Agree	Agree	Agree	Agree	Disagree	Agree	No	Yes	Sometimes	Yes	No	Yes	Yes
1077	Female	12-20	Intermediate (11-12)	Single	Student	Nuclear	≥5	>30,000	Urban area	Less accurate	Less Positive	Less frequent	Yes	Yes	No	No	No	No	Agree	Agree	Agree	Agree	Disagree	Agree	Yes	Yes	Sometimes	Yes	No	Yes	Yes
1078	Female	21-30	Highier education (avobe bachelor)	Single	Student	Nuclear	<5	>30,000	Rural area	Less accurate	Less Positive	Less frequent	Yes	Don't know	No	No	No	No	Agree	Agree	Agree	Agree	Disagree	Agree	Yes	Yes	Sometimes	Yes	No	Yes	Yes
1079	Female	12-20	Intermediate (11-12)	Single	Student	Nuclear	<5	>30,000	Rural area	Less accurate	Less Positive	Less frequent	Yes	Yes	No	No	No	No	Agree	Agree	Agree	Agree	Disagree	Agree	Yes	Yes	Yes	Yes	No	Yes	Sometimes
1080	Female	21-30	Bachelor	Single	Student	Nuclear	<5	>30,000	Rural area	Less accurate	Less Positive	Less frequent	Yes	Yes	No	No	Don't know	No	Agree	Agree	Agree	Agree	Disagree	Undecided	Sometimes	Yes	Sometimes	Yes	No	Yes	Yes
1081	Female	12-20	Bachelor	Single	Student	Nuclear	<5	>30,000	Rural area	Less accurate	Less Positive	Less frequent	No	Yes	No	No	No	No	Agree	Agree	Agree	Agree	Disagree	Agree	Yes	Yes	Yes	Yes	No	Sometimes	Sometimes
1082	Female	12-20	Bachelor	Single	Student	Nuclear	<5	>30,000	Urban area	More accurate	Less Positive	Less frequent	Yes	No	No	No	Yes	No	Agree	Agree	Agree	Agree	Disagree	Agree	Sometimes	Yes	Sometimes	Yes	No	Yes	Yes
1083	Female	12-20	Bachelor	Single	Student	Nuclear	<5	>30,000	Rural area	Less accurate	Less Positive	Less frequent	Yes	No	No	No	No	No	Agree	Agree	Agree	Agree	Disagree	Agree	Yes	Yes	No	Yes	No	Yes	Yes
1084	Female	21-30	Bachelor	Single	Student	Nuclear	<5	>30,000	Rural area	Less accurate	Less Positive	Less frequent	Yes	Yes	No	No	No	No	Agree	Agree	Agree	Agree	Disagree	Agree	Yes	Yes	Sometimes	Yes	No	Yes	Yes
1085	Male	>30	Highier education (avobe bachelor)	Married	Govt. employee	Nuclear	<5	>30,000	Rural area	Less accurate	Less Positive	Less frequent	Yes	Yes	No	No	No	No	Agree	Agree	Agree	Agree	Disagree	Agree	No	Yes	No	Yes	Yes	Yes	Yes
1086	Female	21-30	Highier education (avobe bachelor)	Married	Govt. employee	Nuclear	<5	>30,000	Rural area	Less accurate	Less Positive	Less frequent	Yes	Yes	No	No	No	No	Agree	Agree	Agree	Agree	Disagree	Agree	Yes	Yes	Sometimes	Yes	No	Yes	Yes
1087	Female	>30	Highier education (avobe bachelor)	Married	Non-govt. empolyee	Nuclear	<5	>30,000	Rural area	Less accurate	Less Positive	Less frequent	Yes	Yes	No	No	No	No	Agree	Agree	Agree	Disagree	Agree	Agree	Yes	Yes	No	Yes	No	Yes	No
1088	Female	>30	Bachelor	Married	Govt. employee	Nuclear	<5	>30,000	Rural area	Less accurate	Less Positive	Less frequent	Yes	Yes	No	No	Yes	No	Disagree	Agree	Agree	Agree	Agree	Disagree	No	Yes	No	No	Yes	No	No
1089	Male	12-20	Bachelor	Divorced	Student	Nuclear	<5	>30,000	Rural area	Less accurate	Less Positive	Less frequent	Yes	Yes	No	No	No	No	Agree	Agree	Agree	Agree	Disagree	Agree	Sometimes	Yes	No	Yes	Yes	Yes	Sometimes
1090	Male	21-30	Bachelor	Single	Student	Join	≥5	>30,000	Rural area	Less accurate	Less Positive	Less frequent	Yes	Yes	No	No	No	No	Agree	Agree	Agree	Agree	Disagree	Agree	Sometimes	Yes	Sometimes	Sometimes	No	Sometimes	Sometimes
1091	Male	21-30	Highier education (avobe bachelor)	Single	Govt. employee	Join	≥5	>30,000	Rural area	Less accurate	Less Positive	Less frequent	Yes	Yes	No	No	No	No	Agree	Agree	Agree	Agree	Disagree	Agree	Sometimes	Yes	Yes	Yes	No	Sometimes	Yes
1092	Male	12-20	Bachelor	Single	Student	Join	≥5	>30,000	Urban area	Less accurate	Less Positive	Less frequent	Yes	Yes	No	No	Don't know	No	Agree	Agree	Agree	Agree	Disagree	Agree	Sometimes	Yes	Yes	Sometimes	No	Yes	Yes
1093	Male	12-20	Bachelor	Single	Student	Join	≥5	>30,000	Urban area	Less accurate	Less Positive	Less frequent	Yes	Yes	No	No	No	No	Agree	Agree	Agree	Agree	Disagree	Agree	Yes	Yes	Sometimes	Yes	No	Yes	Yes
1094	Male	21-30	Bachelor	Single	Student	Join	≥5	>30,000	Rural area	Less accurate	Less Positive	Less frequent	Yes	Yes	No	No	No	No	Agree	Agree	Agree	Agree	Disagree	Agree	Yes	Yes	Yes	Sometimes	No	Yes	Yes
1095	Male	21-30	Bachelor	Single	Student	Join	≥5	>30,000	Rural area	Less accurate	Less Positive	Less frequent	Yes	Yes	No	No	No	No	Agree	Agree	Agree	Agree	Disagree	Agree	No	Yes	Sometimes	Yes	No	Yes	Yes
1096	Male	12-20	Bachelor	Single	Student	Join	≥5	>30,000	Rural area	Less accurate	Less Positive	Less frequent	No	Yes	No	No	Yes	No	Disagree	Disagree	Agree	Agree	Disagree	Disagree	Yes	Yes	Yes	Sometimes	No	Yes	Yes
1097	Male	21-30	Bachelor	Single	Govt. employee	Join	≥5	>30,000	Urban area	Less accurate	Less Positive	Less frequent	Yes	Yes	No	No	No	No	Agree	Agree	Agree	Agree	Disagree	Agree	Sometimes	Yes	Yes	Sometimes	No	Yes	Sometimes
1098	Female	21-30	Bachelor	Single	Student	Join	≥5	>30,000	Rural area	Less accurate	Less Positive	Less frequent	Yes	Yes	No	No	Don't know	No	Agree	Agree	Agree	Agree	Disagree	Agree	Yes	Yes	Sometimes	Yes	No	Yes	Yes
1099	Female	21-30	Bachelor	Single	Student	Join	≥5	>30,000	Rural area	Less accurate	Less Positive	Less frequent	Yes	Yes	No	No	Don't know	No	Agree	Agree	Agree	Agree	Disagree	Agree	Yes	Yes	Sometimes	Yes	No	Yes	Yes
1100	Male	21-30	Bachelor	Married	Student	Join	≥5	>30,000	Rural area	Less accurate	Less Positive	Less frequent	Yes	No	No	No	No	No	Undecided	Agree	Agree	Disagree	Agree	Agree	Yes	Yes	Yes	Yes	Yes	Sometimes	Sometimes
1101	Male	21-30	Bachelor	Married	Non-govt. empolyee	Join	≥5	>30,000	Rural area	Less accurate	Less Positive	Less frequent	Yes	Yes	No	No	No	No	Agree	Agree	Agree	Agree	Disagree	Agree	Yes	Yes	Yes	Yes	No	Yes	No
1102	Female	21-30	Bachelor	Married	Housewife	Join	<5	>30,000	Rural area	Less accurate	Less Positive	Less frequent	Yes	Yes	No	No	Don't know	No	Agree	Agree	Agree	Undecided	Disagree	Undecided	Sometimes	Yes	Sometimes	Yes	No	Sometimes	Yes
1103	Female	21-30	Bachelor	Married	Student	Join	<5	>30,000	Rural area	Less accurate	Less Positive	Less frequent	Yes	Yes	No	No	Don't know	No	Agree	Agree	Agree	Agree	Disagree	Agree	Sometimes	Yes	Sometimes	Yes	No	Yes	Yes
1104	Female	21-30	Bachelor	Married	Housewife	Join	≥5	>30,000	Rural area	Less accurate	Less Positive	Less frequent	Yes	Yes	No	No	No	No	Agree	Agree	Agree	Agree	Disagree	Agree	Yes	Yes	Sometimes	Yes	No	Yes	Yes
1105	Male	12-20	Intermediate (11-12)	Single	Student	Nuclear	<5	<20,000	Urban area	Less accurate	Less Positive	Less frequent	Yes	Yes	No	No	No	No	Agree	Agree	Agree	Agree	Disagree	Agree	Yes	No	No	Sometimes	No	Yes	Sometimes
1106	Male	12-20	Intermediate (11-12)	Single	Student	Nuclear	<5	<20,000	Urban area	Less accurate	Less Positive	Less frequent	Yes	Yes	No	No	No	No	Agree	Agree	Agree	Agree	Disagree	Agree	Yes	Sometimes	Sometimes	Sometimes	No	Sometimes	Sometimes
1107	Female	12-20	Bachelor	Single	Student	Nuclear	<5	<20,000	Rural area	Less accurate	Less Positive	Less frequent	Yes	Yes	No	No	No	No	Agree	Undecided	Agree	Undecided	Undecided	Agree	Yes	Sometimes	Yes	Yes	No	Sometimes	Sometimes
1108	Female	12-20	Bachelor	Single	Student	Nuclear	<5	<20,000	Rural area	Less accurate	Less Positive	Less frequent	Yes	Yes	No	No	No	No	Agree	Agree	Agree	Agree	Disagree	Agree	Sometimes	Sometimes	No	Yes	No	Yes	Yes
1109	Male	12-20	Bachelor	Single	Student	Join	<5	<20,000	Urban area	Less accurate	Less Positive	Less frequent	Yes	Yes	No	No	Don't know	Don't know	Agree	Agree	Agree	Agree	Disagree	Agree	Sometimes	Sometimes	Sometimes	No	No	Sometimes	Sometimes
1110	Male	12-20	Bachelor	Single	Student	Join	≥5	<20,000	Urban area	Less accurate	Less Positive	Less frequent	Yes	Yes	No	No	No	No	Agree	Agree	Agree	Agree	Disagree	Agree	Yes	Sometimes	Sometimes	Yes	No	Sometimes	Yes
1111	Male	21-30	Highier education (avobe bachelor)	Single	Student	Nuclear	<5	20,000-30,000	Rural area	Less accurate	Less Positive	Less frequent	Yes	Yes	No	No	No	No	Agree	Agree	Agree	Agree	Disagree	Agree	Sometimes	Sometimes	Sometimes	Yes	No	Sometimes	Yes
1112	Male	12-20	Bachelor	Single	Student	Nuclear	≥5	20,000-30,000	Urban area	Less accurate	Less Positive	Less frequent	Yes	Yes	No	No	No	No	Agree	Agree	Agree	Agree	Disagree	Agree	Sometimes	Sometimes	Sometimes	Sometimes	No	Sometimes	Yes
1113	Male	21-30	Highier education (avobe bachelor)	Single	Student	Nuclear	<5	20,000-30,000	Rural area	Less accurate	Less Positive	Less frequent	Yes	Yes	No	No	No	No	Agree	Agree	Agree	Agree	Disagree	Agree	Yes	Sometimes	Sometimes	Yes	No	Yes	Yes
1114	Male	21-30	Bachelor	Single	Student	Nuclear	<5	20,000-30,000	Rural area	Less accurate	Less Positive	Less frequent	Yes	Yes	No	No	No	No	Agree	Agree	Agree	Agree	Disagree	Agree	Yes	Sometimes	No	Yes	No	Yes	Yes
1115	Male	21-30	Bachelor	Single	Student	Nuclear	<5	>30,000	Rural area	Less accurate	Less Positive	Less frequent	Yes	Yes	No	No	No	No	Agree	Agree	Agree	Agree	Disagree	Agree	Sometimes	Sometimes	Sometimes	Yes	No	Sometimes	Yes
1116	Male	21-30	Bachelor	Single	Student	Nuclear	<5	>30,000	Rural area	Less accurate	Less Positive	Less frequent	Yes	Yes	No	No	No	No	Agree	Agree	Agree	Agree	Agree	Disagree	Sometimes	Sometimes	Yes	Yes	Yes	Sometimes	Yes
1117	Male	12-20	Bachelor	Single	Student	Nuclear	≥5	>30,000	Urban area	Less accurate	Less Positive	Less frequent	Yes	Yes	No	No	No	No	Agree	Agree	Agree	Agree	Disagree	Agree	Yes	Sometimes	Yes	Yes	No	Yes	Sometimes
1118	Female	21-30	Bachelor	Single	Student	Nuclear	<5	>30,000	Rural area	Less accurate	Less Positive	Less frequent	Yes	Yes	No	No	No	No	Agree	Agree	Agree	Agree	Disagree	Agree	Yes	Sometimes	Sometimes	Yes	Yes	Yes	Yes
1119	Female	12-20	Intermediate (11-12)	Single	Student	Nuclear	<5	>30,000	Rural area	Less accurate	Less Positive	Less frequent	Yes	Yes	No	No	No	No	Agree	Agree	Agree	Disagree	Undecided	Agree	Yes	Sometimes	Yes	Yes	No	Yes	Yes
1120	Male	>30	Highier education (avobe bachelor)	Married	Non-govt. empolyee	Nuclear	≥5	>30,000	Rural area	Less accurate	Less Positive	Less frequent	Yes	Yes	No	No	Don't know	No	Agree	Agree	Agree	Agree	Disagree	Agree	Sometimes	Sometimes	Sometimes	Yes	No	Sometimes	Yes
1121	Male	21-30	Bachelor	Single	Student	Nuclear	<5	<20,000	Rural area	Less accurate	Less Positive	More frequent	Yes	Yes	No	No	No	No	Agree	Agree	Agree	Agree	Disagree	Agree	Yes	Yes	Yes	Yes	No	Yes	Yes
1122	Male	21-30	Bachelor	Single	Student	Nuclear	≥5	<20,000	Urban area	Less accurate	Less Positive	More frequent	Yes	Yes	No	No	Don't know	No	Agree	Agree	Agree	Agree	Disagree	Agree	Yes	Yes	Yes	Yes	No	Yes	Yes
1123	Male	21-30	Highier education (avobe bachelor)	Single	Student	Nuclear	<5	<20,000	Rural area	Less accurate	Less Positive	More frequent	Yes	Yes	No	No	No	No	Agree	Agree	Agree	Agree	Disagree	Agree	Yes	Yes	Yes	Yes	Yes	Yes	Yes
1124	Male	12-20	Bachelor	Single	Student	Nuclear	≥5	<20,000	Urban area	Less accurate	Less Positive	More frequent	Yes	Yes	No	No	No	No	Agree	Agree	Agree	Agree	Disagree	Agree	Yes	Yes	Yes	Yes	Yes	Yes	Yes
1125	Male	21-30	Intermediate (11-12)	Single	Businessman	Nuclear	<5	<20,000	Rural area	Less accurate	Less Positive	More frequent	Yes	Yes	No	No	No	No	Agree	Agree	Agree	Agree	Disagree	Agree	Yes	Yes	Yes	Yes	No	Yes	Yes
1126	Male	21-30	Highier education (avobe bachelor)	Single	Student	Nuclear	<5	<20,000	Urban area	Less accurate	Less Positive	More frequent	Yes	Yes	No	No	No	Don't know	Agree	Agree	Agree	Agree	Disagree	Agree	Yes	Yes	Yes	Yes	No	Yes	Yes
1127	Male	21-30	Bachelor	Single	Student	Nuclear	≥5	<20,000	Urban area	Less accurate	Less Positive	More frequent	Yes	Yes	No	No	Yes	No	Agree	Agree	Agree	Agree	Disagree	Agree	Yes	Yes	Yes	Yes	Yes	Yes	Yes
1128	Male	21-30	Bachelor	Single	Student	Nuclear	<5	<20,000	Rural area	Less accurate	Less Positive	More frequent	Yes	Don't know	No	No	No	No	Disagree	Agree	Agree	Agree	Disagree	Agree	Yes	Yes	Yes	Yes	No	Yes	Yes
1129	Male	12-20	Intermediate (11-12)	Single	Student	Nuclear	<5	<20,000	Rural area	Less accurate	Less Positive	More frequent	Yes	No	No	No	No	No	Agree	Agree	Agree	Agree	Disagree	Agree	Yes	Yes	Yes	Yes	No	Yes	Yes
1130	Male	21-30	Intermediate (11-12)	Single	Student	Nuclear	≥5	<20,000	Urban area	Less accurate	Less Positive	More frequent	Yes	Yes	No	No	No	No	Agree	Agree	Agree	Agree	Disagree	Agree	Yes	Yes	Yes	Yes	No	Yes	Yes
1131	Male	21-30	Bachelor	Single	Student	Nuclear	<5	<20,000	Urban area	Less accurate	Less Positive	More frequent	Yes	Yes	No	No	No	No	Agree	Agree	Agree	Disagree	Disagree	Disagree	Yes	Yes	Yes	Yes	No	Yes	Yes
1132	Male	21-30	Highier education (avobe bachelor)	Single	Student	Nuclear	<5	<20,000	Rural area	Less accurate	Less Positive	More frequent	Yes	Yes	No	No	No	No	Agree	Agree	Agree	Agree	Disagree	Agree	Yes	Yes	Yes	Yes	No	Yes	Yes
1133	Male	21-30	Bachelor	Single	Student	Nuclear	<5	<20,000	Urban area	Less accurate	Less Positive	More frequent	Yes	Yes	No	No	No	No	Agree	Agree	Agree	Agree	Disagree	Agree	Yes	Yes	Yes	Yes	Yes	Yes	Yes
1134	Male	12-20	Bachelor	Single	Student	Nuclear	<5	<20,000	Rural area	Less accurate	Less Positive	More frequent	Yes	No	No	No	No	No	Agree	Agree	Agree	Agree	Disagree	Agree	Sometimes	Yes	Yes	Yes	Yes	Yes	Yes
1135	Female	12-20	Bachelor	Single	Student	Nuclear	<5	<20,000	Rural area	Less accurate	Less Positive	More frequent	Yes	Yes	No	No	Don't know	No	Agree	Agree	Agree	Agree	Disagree	Agree	Yes	Yes	Yes	Yes	No	Yes	Yes
1136	Female	12-20	Bachelor	Single	Student	Nuclear	<5	<20,000	Rural area	Less accurate	Less Positive	More frequent	Yes	Yes	No	No	Yes	No	Agree	Agree	Agree	Agree	Disagree	Agree	Yes	Yes	Yes	Yes	No	Yes	Yes
1137	Female	12-20	Intermediate (11-12)	Single	Student	Nuclear	≥5	<20,000	Rural area	Less accurate	Less Positive	More frequent	Yes	Don't know	No	No	Don't know	No	Agree	Agree	Agree	Agree	Disagree	Agree	Sometimes	Yes	Yes	Yes	Yes	Yes	Yes
1138	Female	21-30	Bachelor	Single	Student	Nuclear	<5	<20,000	Rural area	Less accurate	Less Positive	More frequent	Yes	Yes	No	No	No	No	Agree	Agree	Agree	Agree	Disagree	Agree	Yes	Yes	Yes	Yes	No	Yes	Yes
1139	Female	12-20	Bachelor	Single	Student	Nuclear	<5	<20,000	Rural area	Less accurate	Less Positive	More frequent	Yes	Yes	No	No	Yes	No	Agree	Agree	Agree	Agree	Disagree	Agree	Yes	Yes	Yes	Yes	No	Yes	Yes
1140	Female	12-20	Bachelor	Single	Student	Nuclear	<5	<20,000	Urban area	Less accurate	Less Positive	More frequent	Yes	Yes	No	No	No	No	Agree	Agree	Agree	Agree	Disagree	Agree	Yes	Yes	Yes	Yes	Yes	Yes	Yes
1141	Female	21-30	Bachelor	Single	Student	Nuclear	<5	<20,000	Rural area	Less accurate	Less Positive	More frequent	Yes	Yes	No	No	No	No	Agree	Agree	Agree	Agree	Disagree	Agree	Yes	Yes	Yes	Yes	No	Yes	Yes
1142	Female	12-20	Bachelor	Single	Student	Nuclear	<5	<20,000	Rural area	Less accurate	Less Positive	More frequent	Yes	Yes	No	No	No	No	Agree	Agree	Agree	Agree	Disagree	Agree	Yes	Yes	Yes	Yes	Yes	Yes	Yes
1143	Female	12-20	Bachelor	Single	Student	Nuclear	<5	<20,000	Rural area	Less accurate	Less Positive	More frequent	Yes	Yes	No	No	No	No	Agree	Agree	Agree	Disagree	Disagree	Agree	Yes	Yes	Yes	Yes	Yes	Yes	Yes
1144	Female	12-20	Bachelor	Single	Student	Nuclear	<5	<20,000	Urban area	Less accurate	Less Positive	More frequent	Yes	Yes	No	No	No	No	Agree	Agree	Agree	Agree	Disagree	Agree	Yes	Yes	Yes	Yes	Yes	Yes	Yes
1145	Female	21-30	Bachelor	Single	Student	Nuclear	<5	<20,000	Rural area	Less accurate	Less Positive	More frequent	Yes	Yes	No	No	No	No	Agree	Agree	Agree	Agree	Disagree	Agree	Yes	Yes	Yes	Yes	No	Yes	Yes
1146	Male	21-30	Bachelor	Married	Student	Nuclear	<5	<20,000	Rural area	Less accurate	Less Positive	More frequent	Yes	Yes	No	No	No	No	Agree	Agree	Agree	Agree	Disagree	Agree	Yes	Yes	Yes	Yes	No	Yes	Yes
1147	Male	>30	Bachelor	Married	Non-govt. empolyee	Nuclear	<5	<20,000	Urban area	Less accurate	Less Positive	More frequent	Yes	Yes	No	No	No	No	Agree	Agree	Agree	Disagree	Disagree	Agree	Yes	Yes	Yes	Yes	Yes	Yes	Yes
1148	Male	21-30	Bachelor	Married	Non-govt. empolyee	Nuclear	<5	<20,000	Rural area	Less accurate	Less Positive	More frequent	Don't know	Yes	No	No	No	No	Agree	Agree	Agree	Agree	Disagree	Disagree	Yes	Yes	Yes	Yes	Yes	Yes	Yes
1149	Female	21-30	Bachelor	Married	Student	Nuclear	≥5	<20,000	Rural area	Less accurate	Less Positive	More frequent	Yes	Yes	No	No	No	No	Agree	Agree	Agree	Agree	Disagree	Disagree	Yes	Yes	Yes	Yes	Yes	Yes	Yes
1150	Male	21-30	Bachelor	Single	Student	Join	<5	<20,000	Rural area	Less accurate	Less Positive	More frequent	Yes	Yes	No	No	Don't know	No	Agree	Agree	Agree	Agree	Disagree	Agree	Sometimes	Yes	Yes	Yes	Yes	Yes	Yes
1151	Male	>30	Highier education (avobe bachelor)	Single	Businessman	Join	<5	<20,000	Urban area	Less accurate	Less Positive	More frequent	Yes	Yes	No	No	No	No	Agree	Agree	Agree	Agree	Disagree	Agree	Yes	Yes	Yes	Yes	No	Yes	Yes
1152	Male	12-20	Bachelor	Single	Student	Join	≥5	<20,000	Urban area	Less accurate	Less Positive	More frequent	Yes	Yes	No	No	No	No	Agree	Agree	Agree	Agree	Agree	Disagree	Yes	Yes	Sometimes	Yes	Yes	Yes	Yes
1153	Female	12-20	Intermediate (11-12)	Single	Student	Join	≥5	<20,000	Rural area	Less accurate	Less Positive	More frequent	Yes	Yes	No	No	Don't know	No	Agree	Agree	Agree	Agree	Disagree	Agree	Yes	Yes	Yes	Yes	No	Yes	Yes
1154	Male	21-30	Bachelor	Married	Businessman	Join	≥5	<20,000	Urban area	Less accurate	Less Positive	More frequent	Yes	Yes	No	No	No	No	Agree	Agree	Agree	Agree	Disagree	Agree	Yes	Yes	Yes	Yes	No	Yes	Yes
1155	Male	12-20	Bachelor	Single	Student	Nuclear	<5	20,000-30,000	Urban area	Less accurate	Less Positive	More frequent	Yes	Yes	No	No	No	No	Agree	Agree	Agree	Agree	Disagree	Agree	No	Yes	Yes	Yes	Yes	Yes	Yes
1156	Male	12-20	Bachelor	Single	Student	Nuclear	≥5	20,000-30,000	Urban area	Less accurate	Less Positive	More frequent	Yes	Yes	No	No	No	No	Agree	Agree	Agree	Agree	Disagree	Agree	Yes	Yes	Yes	Yes	No	Yes	Yes
1157	Male	12-20	Bachelor	Single	Student	Nuclear	<5	20,000-30,000	Rural area	Less accurate	Less Positive	More frequent	Yes	Yes	No	No	No	No	Agree	Agree	Agree	Agree	Disagree	Agree	Yes	Yes	Yes	Yes	Yes	Yes	Yes
1158	Male	21-30	Bachelor	Single	Student	Nuclear	<5	20,000-30,000	Rural area	Less accurate	Less Positive	More frequent	Yes	Yes	No	No	No	No	Agree	Agree	Agree	Agree	Disagree	Disagree	Yes	Yes	Yes	Yes	Yes	Yes	Yes
1159	Male	21-30	Bachelor	Single	Student	Nuclear	≥5	20,000-30,000	Urban area	Less accurate	Less Positive	More frequent	Yes	Yes	No	No	Yes	No	Agree	Agree	Agree	Agree	Disagree	Agree	Yes	Yes	Yes	Yes	No	Yes	Yes
1160	Male	21-30	Bachelor	Single	Student	Nuclear	<5	20,000-30,000	Rural area	Less accurate	Less Positive	More frequent	Yes	Yes	No	No	No	No	Agree	Agree	Agree	Agree	Disagree	Agree	Yes	Yes	Yes	Yes	Yes	Yes	Yes
1161	Male	21-30	Bachelor	Single	Student	Nuclear	<5	20,000-30,000	Urban area	Less accurate	Less Positive	More frequent	Yes	Yes	No	No	Yes	Yes	Agree	Agree	Agree	Agree	Disagree	Agree	Yes	Yes	Yes	Yes	No	Yes	Yes
1162	Male	21-30	Bachelor	Single	Student	Nuclear	<5	20,000-30,000	Rural area	Less accurate	Less Positive	More frequent	Yes	Yes	No	No	No	No	Agree	Agree	Agree	Disagree	Agree	Agree	Yes	Yes	Yes	Sometimes	Yes	Yes	Yes
1163	Male	12-20	Bachelor	Single	Student	Nuclear	<5	20,000-30,000	Rural area	Less accurate	Less Positive	More frequent	Yes	Yes	No	No	No	No	Agree	Agree	Agree	Agree	Disagree	Agree	Sometimes	Yes	Yes	Yes	Yes	Yes	Yes
1164	Male	21-30	Bachelor	Single	Student	Nuclear	<5	20,000-30,000	Rural area	Less accurate	Less Positive	More frequent	Yes	Yes	No	No	No	No	Agree	Agree	Agree	Agree	Disagree	Agree	Yes	Yes	Sometimes	Yes	Yes	Yes	Yes
1165	Male	21-30	Bachelor	Single	Student	Nuclear	≥5	20,000-30,000	Urban area	Less accurate	Less Positive	More frequent	Yes	No	No	No	No	No	Agree	Agree	Agree	Disagree	Agree	Agree	Yes	Yes	Yes	Yes	Yes	Yes	Yes
1166	Male	21-30	Bachelor	Single	Student	Nuclear	<5	20,000-30,000	Rural area	More accurate	Less Positive	More frequent	Yes	No	No	No	Yes	No	Agree	Agree	Agree	Agree	Disagree	Agree	Yes	Yes	Yes	Yes	No	Yes	Yes
1167	Male	21-30	Bachelor	Single	Govt. employee	Nuclear	<5	20,000-30,000	Rural area	Less accurate	Less Positive	More frequent	Yes	Yes	No	No	No	Don't know	Agree	Agree	Agree	Agree	Disagree	Agree	Yes	Yes	Yes	Yes	No	Yes	Yes
1168	Male	21-30	Highier education (avobe bachelor)	Single	Govt. employee	Nuclear	<5	20,000-30,000	Rural area	Less accurate	Less Positive	More frequent	Yes	Yes	No	No	No	No	Agree	Agree	Agree	Agree	Disagree	Agree	Yes	Yes	Yes	Yes	No	Yes	Yes
1169	Male	21-30	Bachelor	Single	Student	Nuclear	<5	20,000-30,000	Rural area	Less accurate	Less Positive	More frequent	Yes	Yes	No	No	No	No	Agree	Agree	Agree	Disagree	Agree	Agree	Yes	Yes	Sometimes	Yes	Yes	Yes	Yes
1170	Female	12-20	Intermediate (11-12)	Single	Student	Nuclear	<5	20,000-30,000	Rural area	Less accurate	Less Positive	More frequent	Yes	Yes	No	No	No	No	Agree	Agree	Agree	Agree	Disagree	Agree	Yes	Yes	Yes	Yes	No	Yes	Yes
1171	Female	12-20	Bachelor	Single	Student	Nuclear	<5	20,000-30,000	Rural area	Less accurate	Less Positive	More frequent	Yes	Yes	No	No	Yes	No	Agree	Agree	Agree	Agree	Disagree	Agree	Yes	Yes	Yes	Yes	No	Yes	Yes
1172	Female	12-20	Bachelor	Single	Student	Nuclear	<5	20,000-30,000	Rural area	Less accurate	Less Positive	More frequent	Yes	Yes	No	No	No	No	Agree	Agree	Agree	Agree	Disagree	Agree	Yes	Yes	Sometimes	Yes	Yes	Yes	Yes
1173	Female	12-20	Intermediate (11-12)	Single	Student	Nuclear	<5	20,000-30,000	Rural area	Less accurate	Less Positive	More frequent	Yes	Yes	No	No	Don't know	No	Agree	Agree	Agree	Agree	Disagree	Agree	Yes	Yes	Yes	Yes	No	Yes	Yes
1174	Female	12-20	Bachelor	Single	Student	Nuclear	<5	20,000-30,000	Urban area	Less accurate	Less Positive	More frequent	Yes	Yes	No	No	No	No	Agree	Agree	Agree	Agree	Disagree	Agree	Yes	Yes	Yes	Yes	No	Yes	Yes
1175	Female	21-30	Bachelor	Single	Student	Nuclear	≥5	20,000-30,000	Rural area	Less accurate	Less Positive	More frequent	Yes	Yes	No	No	No	No	Agree	Agree	Agree	Disagree	Disagree	Agree	Yes	Yes	Yes	Yes	Yes	Yes	Yes
1176	Female	21-30	Bachelor	Single	Student	Nuclear	<5	20,000-30,000	Rural area	Less accurate	Less Positive	More frequent	Yes	Yes	No	No	No	No	Agree	Agree	Agree	Undecided	Disagree	Disagree	Yes	Yes	Yes	Yes	No	Yes	Yes
1177	Female	12-20	Bachelor	Single	Student	Nuclear	<5	20,000-30,000	Urban area	Less accurate	Less Positive	More frequent	Yes	No	No	No	No	No	Agree	Agree	Agree	Agree	Disagree	Agree	Yes	Yes	Yes	Yes	No	Yes	Yes
1178	Female	21-30	Highier education (avobe bachelor)	Single	Student	Nuclear	≥5	20,000-30,000	Rural area	Less accurate	Less Positive	More frequent	Yes	Yes	No	No	Don't know	No	Agree	Agree	Agree	Agree	Disagree	Agree	Yes	Yes	Sometimes	Yes	Yes	Yes	Yes
1179	Female	21-30	Bachelor	Married	Housewife	Nuclear	<5	20,000-30,000	Rural area	Less accurate	Less Positive	More frequent	Yes	Yes	No	No	No	No	Agree	Agree	Agree	Undecided	Disagree	Agree	Yes	Yes	Yes	Yes	No	Yes	Yes
1180	Female	12-20	Bachelor	Married	Student	Nuclear	≥5	20,000-30,000	Rural area	Less accurate	Less Positive	More frequent	Yes	Yes	No	No	No	No	Agree	Agree	Agree	Undecided	Undecided	Undecided	Yes	Yes	Yes	Yes	Yes	Yes	Yes
1181	Female	21-30	Intermediate (11-12)	Divorced	Housewife	Nuclear	<5	20,000-30,000	Rural area	Less accurate	Less Positive	More frequent	Yes	Yes	No	No	No	No	Agree	Agree	Agree	Disagree	Agree	Agree	Yes	Yes	Yes	Yes	Yes	Yes	Yes
1182	Male	21-30	Highier education (avobe bachelor)	Single	Student	Join	≥5	20,000-30,000	Rural area	Less accurate	Less Positive	More frequent	Yes	Yes	No	No	Yes	No	Agree	Agree	Agree	Agree	Disagree	Agree	Yes	Yes	Yes	Yes	Yes	Yes	Yes
1183	Male	21-30	Bachelor	Single	Student	Join	<5	20,000-30,000	Rural area	Less accurate	Less Positive	More frequent	Yes	Yes	No	No	No	No	Agree	Agree	Agree	Agree	Disagree	Agree	Yes	Yes	Yes	Yes	No	Yes	Yes
1184	Male	12-20	Bachelor	Single	Student	Join	≥5	20,000-30,000	Urban area	Less accurate	Less Positive	More frequent	Yes	Yes	No	No	No	No	Agree	Agree	Agree	Agree	Disagree	Agree	Yes	Yes	Yes	Yes	No	Yes	Yes
1185	Male	21-30	Bachelor	Single	Student	Join	≥5	20,000-30,000	Urban area	Less accurate	Less Positive	More frequent	Yes	Yes	No	No	No	No	Agree	Agree	Agree	Agree	Disagree	Agree	Yes	Yes	Yes	Yes	No	Yes	Yes
1186	Male	>30	Highier education (avobe bachelor)	Married	Govt. employee	Join	<5	20,000-30,000	Rural area	Less accurate	Less Positive	More frequent	Yes	Yes	No	No	Yes	No	Agree	Agree	Agree	Agree	Disagree	Agree	Yes	Yes	Yes	Yes	No	Yes	Yes
1187	Male	21-30	Bachelor	Single	Non-govt. empolyee	Nuclear	<5	>30,000	Rural area	Less accurate	Less Positive	More frequent	Yes	Yes	No	No	No	No	Agree	Agree	Agree	Agree	Disagree	Agree	Yes	Yes	Sometimes	Yes	Yes	Yes	Yes
1188	Male	21-30	Bachelor	Single	Student	Nuclear	<5	>30,000	Rural area	Less accurate	Less Positive	More frequent	Yes	Yes	No	No	No	No	Agree	Agree	Agree	Agree	Disagree	Agree	Yes	Yes	Sometimes	Yes	Yes	Yes	Yes
1189	Male	12-20	Bachelor	Single	Student	Nuclear	<5	>30,000	Rural area	Less accurate	Less Positive	More frequent	Yes	No	No	No	Yes	Don't know	Agree	Agree	Agree	Undecided	Undecided	Agree	Yes	Yes	Yes	Yes	Yes	Yes	Yes
1190	Male	21-30	Highier education (avobe bachelor)	Single	Student	Nuclear	≥5	>30,000	Urban area	Less accurate	Less Positive	More frequent	Yes	No	No	No	No	No	Agree	Agree	Agree	Agree	Disagree	Agree	Yes	Yes	Yes	Yes	Yes	Yes	Yes
1191	Male	21-30	Bachelor	Single	Student	Nuclear	<5	>30,000	Rural area	Less accurate	Less Positive	More frequent	Yes	Yes	No	No	No	No	Agree	Agree	Agree	Agree	Disagree	Agree	Yes	Yes	Yes	Yes	No	Yes	Yes
1192	Male	12-20	Bachelor	Single	Student	Nuclear	<5	>30,000	Rural area	Less accurate	Less Positive	More frequent	Yes	Yes	No	No	No	No	Agree	Agree	Agree	Agree	Disagree	Agree	Yes	Yes	Yes	Yes	No	Yes	Yes
1193	Male	12-20	Bachelor	Single	Student	Nuclear	<5	>30,000	Rural area	Less accurate	Less Positive	More frequent	Yes	Yes	No	No	Yes	No	Agree	Agree	Agree	Agree	Disagree	Agree	Yes	Yes	Yes	Yes	Yes	Yes	Yes
1194	Male	21-30	Bachelor	Single	Student	Nuclear	<5	>30,000	Rural area	Less accurate	Less Positive	More frequent	Yes	Yes	No	No	No	No	Agree	Agree	Agree	Agree	Disagree	Agree	Yes	Yes	Yes	Yes	No	Yes	Yes
1195	Male	12-20	Bachelor	Single	Student	Nuclear	<5	>30,000	Rural area	Less accurate	Less Positive	More frequent	Yes	Yes	No	No	Don't know	Don't know	Agree	Agree	Agree	Agree	Disagree	Agree	Yes	Yes	Yes	Yes	No	Yes	Yes
1196	Male	21-30	Bachelor	Single	Student	Nuclear	<5	>30,000	Urban area	Less accurate	Less Positive	More frequent	No	Yes	No	No	No	No	Agree	Agree	Agree	Agree	Disagree	Agree	Yes	Yes	Yes	Yes	No	Yes	Yes
1197	Male	21-30	Intermediate (11-12)	Single	Student	Nuclear	<5	>30,000	Rural area	Less accurate	Less Positive	More frequent	Yes	Don't know	No	No	No	No	Agree	Agree	Agree	Agree	Disagree	Agree	Yes	Yes	Yes	Yes	No	Yes	Yes
1198	Male	21-30	Highier education (avobe bachelor)	Single	Govt. employee	Nuclear	<5	>30,000	Rural area	Less accurate	Less Positive	More frequent	Yes	Yes	No	No	No	No	Agree	Agree	Agree	Disagree	Disagree	Agree	Yes	Yes	Yes	Yes	Yes	Yes	Yes
1199	Male	21-30	Bachelor	Single	Student	Nuclear	≥5	>30,000	Rural area	Less accurate	Less Positive	More frequent	Yes	No	No	No	No	No	Agree	Agree	Agree	Agree	Disagree	Agree	Yes	Yes	Yes	Yes	Yes	Yes	Yes
1200	Male	21-30	Bachelor	Single	Student	Nuclear	≥5	>30,000	Urban area	Less accurate	Less Positive	More frequent	Yes	Yes	No	No	No	No	Agree	Agree	Agree	Agree	Disagree	Agree	Yes	Yes	Yes	Yes	Yes	Yes	Yes
1201	Male	12-20	Bachelor	Single	Student	Nuclear	<5	>30,000	Rural area	Less accurate	Less Positive	More frequent	Yes	Yes	No	No	No	No	Agree	Agree	Agree	Agree	Disagree	Agree	Yes	Yes	Yes	Yes	Yes	Yes	Yes
1202	Male	21-30	Bachelor	Single	Non-govt. empolyee	Nuclear	<5	>30,000	Rural area	Less accurate	Less Positive	More frequent	Yes	Yes	No	No	Yes	No	Agree	Agree	Agree	Agree	Disagree	Agree	Yes	Yes	Yes	Yes	No	Yes	Yes
1203	Male	12-20	Bachelor	Single	Student	Nuclear	<5	>30,000	Rural area	Less accurate	Less Positive	More frequent	Yes	Yes	No	No	Don't know	No	Agree	Agree	Agree	Agree	Disagree	Agree	Yes	Yes	Yes	Yes	No	Yes	Yes
1204	Male	>30	Intermediate (11-12)	Single	Unemployment	Nuclear	<5	>30,000	Rural area	Less accurate	Less Positive	More frequent	Yes	Yes	No	No	No	No	Agree	Agree	Agree	Agree	Disagree	Agree	Yes	Yes	Yes	Yes	No	Yes	Yes
1205	Male	21-30	Bachelor	Single	Student	Nuclear	<5	>30,000	Rural area	Less accurate	Less Positive	More frequent	Yes	Yes	No	No	No	No	Agree	Agree	Agree	Agree	Disagree	Agree	Yes	Yes	Yes	Yes	Yes	Yes	Yes
1206	Male	21-30	Bachelor	Single	Student	Nuclear	<5	>30,000	Rural area	Less accurate	Less Positive	More frequent	Yes	Yes	No	No	No	No	Undecided	Agree	Agree	Agree	Agree	Undecided	Yes	Yes	Yes	Yes	No	Yes	Yes
1207	Female	21-30	Highier education (avobe bachelor)	Single	Student	Nuclear	<5	>30,000	Rural area	Less accurate	Less Positive	More frequent	Yes	No	No	No	No	No	Agree	Agree	Agree	Agree	Disagree	Agree	Sometimes	Yes	Yes	Yes	Yes	Yes	Yes
1208	Female	21-30	Bachelor	Single	Student	Nuclear	<5	>30,000	Rural area	Less accurate	Less Positive	More frequent	Yes	Yes	No	No	Yes	No	Agree	Agree	Agree	Agree	Disagree	Agree	Yes	Yes	Yes	Yes	Yes	Yes	Yes
1209	Female	12-20	Bachelor	Single	Student	Nuclear	<5	>30,000	Rural area	Less accurate	Less Positive	More frequent	Yes	No	No	No	No	No	Agree	Agree	Agree	Agree	Disagree	Agree	Yes	Yes	Yes	Yes	No	Yes	Yes
1210	Female	21-30	Bachelor	Single	Student	Nuclear	<5	>30,000	Rural area	Less accurate	Less Positive	More frequent	Yes	Yes	No	No	No	No	Agree	Agree	Disagree	Disagree	Agree	Disagree	Yes	Yes	Yes	Yes	No	Yes	Yes
1211	Female	12-20	Bachelor	Single	Student	Nuclear	<5	>30,000	Rural area	Less accurate	Less Positive	More frequent	Yes	Yes	No	No	No	No	Agree	Agree	Agree	Agree	Disagree	Agree	Yes	Yes	Yes	Yes	No	Yes	Yes
1212	Female	21-30	Bachelor	Single	Student	Nuclear	<5	>30,000	Rural area	Less accurate	Less Positive	More frequent	Yes	Yes	No	No	No	No	Agree	Agree	Agree	Agree	Disagree	Agree	Yes	Yes	Yes	Yes	Yes	Yes	Yes
1213	Female	21-30	Intermediate (11-12)	Single	Student	Nuclear	<5	>30,000	Rural area	Less accurate	Less Positive	More frequent	Yes	Yes	No	No	No	No	Agree	Agree	Agree	Agree	Disagree	Agree	Yes	Yes	Yes	Yes	No	Yes	Yes
1214	Female	12-20	Bachelor	Single	Student	Nuclear	<5	>30,000	Rural area	Less accurate	Less Positive	More frequent	Yes	Yes	No	No	No	No	Agree	Agree	Agree	Agree	Disagree	Agree	Yes	Yes	Yes	Yes	No	Yes	Yes
1215	Female	21-30	Highier education (avobe bachelor)	Single	Student	Nuclear	<5	>30,000	Rural area	Less accurate	Less Positive	More frequent	Yes	Yes	No	No	Don't know	No	Agree	Agree	Agree	Disagree	Disagree	Agree	Yes	Yes	Yes	Yes	Yes	Yes	Yes
1216	Female	12-20	Bachelor	Single	Student	Nuclear	≥5	>30,000	Rural area	Less accurate	Less Positive	More frequent	Yes	Yes	No	No	Don't know	No	Agree	Agree	Agree	Agree	Undecided	Undecided	Yes	Yes	Yes	Yes	No	Yes	Yes
1217	Female	21-30	Bachelor	Single	Student	Nuclear	≥5	>30,000	Rural area	Less accurate	Less Positive	More frequent	Yes	Yes	No	No	No	No	Agree	Agree	Agree	Disagree	Agree	Agree	Yes	Yes	Yes	Yes	Yes	Yes	Yes
1218	Female	21-30	Highier education (avobe bachelor)	Single	Student	Nuclear	<5	>30,000	Rural area	Less accurate	Less Positive	More frequent	Yes	Yes	No	No	No	No	Agree	Agree	Agree	Agree	Disagree	Agree	Yes	Yes	Yes	Yes	No	Yes	Yes
1219	Female	12-20	Intermediate (11-12)	Single	Student	Nuclear	<5	>30,000	Rural area	Less accurate	Less Positive	More frequent	Yes	Yes	No	No	No	No	Agree	Agree	Agree	Agree	Disagree	Agree	Yes	Yes	Sometimes	Yes	Yes	Yes	Yes
1220	Female	12-20	Bachelor	Single	Student	Nuclear	<5	>30,000	Rural area	Less accurate	Less Positive	More frequent	Yes	Yes	No	No	No	No	Agree	Agree	Agree	Agree	Disagree	Agree	Yes	Yes	Yes	Yes	No	Yes	Yes
1221	Female	12-20	Bachelor	Single	Student	Nuclear	≥5	>30,000	Rural area	Less accurate	Less Positive	More frequent	Yes	Yes	No	No	No	No	Agree	Agree	Agree	Agree	Disagree	Agree	Yes	Yes	Yes	Yes	Yes	Yes	Yes
1222	Female	21-30	Bachelor	Single	Student	Nuclear	<5	>30,000	Rural area	Less accurate	Less Positive	More frequent	Yes	Yes	No	No	Yes	No	Agree	Agree	Agree	Agree	Disagree	Agree	Yes	Yes	Yes	Yes	No	Yes	Yes
1223	Female	21-30	Bachelor	Single	Student	Nuclear	<5	>30,000	Rural area	Less accurate	Less Positive	More frequent	Yes	Yes	No	No	No	No	Agree	Agree	Agree	Agree	Disagree	Agree	Yes	Yes	Yes	Yes	Yes	Yes	Yes
1224	Female	12-20	Intermediate (11-12)	Single	Student	Nuclear	<5	>30,000	Rural area	Less accurate	Less Positive	More frequent	Yes	Yes	No	No	Yes	No	Agree	Agree	Agree	Agree	Disagree	Agree	Yes	Yes	Yes	Yes	Yes	Yes	Yes
1225	Female	21-30	Bachelor	Single	Student	Nuclear	<5	>30,000	Rural area	Less accurate	Less Positive	More frequent	Yes	Yes	No	No	No	No	Agree	Agree	Agree	Agree	Disagree	Agree	Yes	Yes	Yes	Yes	No	Yes	Yes
1226	Female	21-30	Bachelor	Single	Non-govt. empolyee	Nuclear	<5	>30,000	Rural area	Less accurate	Less Positive	More frequent	Yes	Yes	No	No	No	No	Agree	Agree	Agree	Agree	Disagree	Agree	Yes	Yes	Yes	Yes	No	Yes	Yes
1227	Female	21-30	Highier education (avobe bachelor)	Single	Non-govt. empolyee	Nuclear	<5	>30,000	Rural area	Less accurate	Less Positive	More frequent	Yes	Yes	No	No	Don't know	No	Agree	Agree	Agree	Agree	Disagree	Agree	Yes	Yes	Yes	Yes	Yes	Yes	Yes
1228	Female	12-20	Bachelor	Single	Student	Nuclear	<5	>30,000	Rural area	Less accurate	Less Positive	More frequent	Yes	Yes	No	No	Yes	No	Agree	Agree	Agree	Agree	Disagree	Agree	Yes	Yes	Yes	Yes	No	Yes	Yes
1229	Male	21-30	Highier education (avobe bachelor)	Married	Non-govt. empolyee	Nuclear	<5	>30,000	Rural area	Less accurate	Less Positive	More frequent	Yes	Yes	No	No	Yes	No	Agree	Agree	Agree	Disagree	Agree	Agree	Yes	Yes	Sometimes	Yes	Yes	Yes	Yes
1230	Male	>30	Bachelor	Married	Businessman	Nuclear	≥5	>30,000	Rural area	Less accurate	Less Positive	More frequent	Yes	Yes	No	No	No	No	Agree	Agree	Agree	Agree	Disagree	Disagree	Yes	Yes	Yes	Yes	Yes	Yes	Yes
1231	Male	>30	Highier education (avobe bachelor)	Married	Unemployment	Nuclear	≥5	>30,000	Rural area	Less accurate	Less Positive	More frequent	Yes	Yes	No	No	No	No	Agree	Agree	Agree	Agree	Disagree	Agree	Yes	Yes	Yes	Yes	Yes	Yes	Yes
1232	Female	21-30	Bachelor	Married	Student	Nuclear	<5	>30,000	Rural area	Less accurate	Less Positive	More frequent	Yes	Yes	No	No	No	No	Agree	Agree	Agree	Agree	Disagree	Agree	Yes	Yes	Yes	Yes	No	Yes	Yes
1233	Female	12-20	Intermediate (11-12)	Married	Student	Nuclear	<5	>30,000	Rural area	Less accurate	Less Positive	More frequent	Yes	Yes	No	No	No	No	Agree	Agree	Agree	Disagree	Disagree	Agree	Yes	Yes	Yes	Yes	No	Yes	Yes
1234	Female	21-30	Highier education (avobe bachelor)	Married	Govt. employee	Nuclear	<5	>30,000	Urban area	Less accurate	Less Positive	More frequent	Yes	Yes	No	No	No	No	Agree	Agree	Agree	Agree	Disagree	Agree	Yes	Yes	Yes	Yes	Yes	Yes	Yes
1235	Male	21-30	Bachelor	Single	Student	Join	<5	>30,000	Rural area	Less accurate	Less Positive	More frequent	Yes	Yes	No	No	Don't know	Don't know	Agree	Agree	Agree	Agree	Disagree	Agree	Yes	Yes	Sometimes	Yes	Yes	Yes	Yes
1236	Male	12-20	Intermediate (11-12)	Single	Student	Join	≥5	>30,000	Rural area	Less accurate	Less Positive	More frequent	Yes	Yes	No	No	No	Yes	Agree	Agree	Agree	Agree	Disagree	Agree	Yes	Yes	Yes	Yes	No	Yes	Yes
1237	Male	21-30	Highier education (avobe bachelor)	Single	Govt. employee	Join	≥5	>30,000	Rural area	Less accurate	Less Positive	More frequent	Yes	Yes	No	No	No	No	Agree	Agree	Agree	Agree	Disagree	Agree	Yes	Yes	Yes	Yes	Yes	Yes	Yes
1238	Male	21-30	Bachelor	Single	Student	Join	≥5	>30,000	Urban area	Less accurate	Less Positive	More frequent	Yes	Yes	No	No	No	No	Agree	Agree	Agree	Agree	Disagree	Disagree	Yes	Yes	Yes	Yes	No	Yes	Yes
1239	Male	>30	Highier education (avobe bachelor)	Married	Non-govt. empolyee	Join	≥5	>30,000	Urban area	Less accurate	Less Positive	More frequent	Yes	Yes	No	No	No	No	Agree	Agree	Agree	Agree	Disagree	Agree	Yes	Yes	Yes	Yes	Yes	Yes	Yes
1240	Male	21-30	Highier education (avobe bachelor)	Married	Non-govt. empolyee	Join	≥5	>30,000	Rural area	Less accurate	Less Positive	More frequent	Yes	Yes	No	No	No	No	Agree	Agree	Agree	Disagree	Disagree	Agree	Yes	Yes	Yes	Yes	Yes	Yes	Yes
1241	Male	21-30	Highier education (avobe bachelor)	Married	Non-govt. empolyee	Join	≥5	>30,000	Rural area	Less accurate	Less Positive	More frequent	Yes	Yes	No	No	No	No	Agree	Agree	Agree	Agree	Disagree	Agree	Yes	Yes	Yes	Yes	Yes	Yes	Yes
1242	Male	>30	Highier education (avobe bachelor)	Married	Non-govt. empolyee	Join	<5	>30,000	Rural area	Less accurate	Less Positive	More frequent	Yes	Yes	No	No	Don't know	No	Undecided	Agree	Agree	Undecided	Agree	Agree	Yes	Yes	Yes	Yes	Yes	Yes	Yes
1243	Female	21-30	Highier education (avobe bachelor)	Married	Non-govt. empolyee	Join	≥5	>30,000	Rural area	Less accurate	Less Positive	More frequent	Don't know	Yes	No	No	No	No	Agree	Agree	Agree	Agree	Disagree	Agree	Yes	Yes	Yes	Yes	Yes	Yes	Yes
1244	Male	12-20	Bachelor	Divorced	Govt. employee	Join	≥5	>30,000	Urban area	Less accurate	Less Positive	More frequent	No	Yes	No	No	No	No	Agree	Agree	Agree	Disagree	Disagree	Agree	Yes	Yes	Yes	Yes	Yes	Yes	Yes
1245	Male	21-30	Bachelor	Single	Student	Nuclear	<5	<20,000	Rural area	Less accurate	More Positive	Less frequent	Yes	Yes	No	No	No	No	Agree	Agree	Agree	Agree	Agree	Agree	Yes	Yes	Yes	Sometimes	No	Yes	Yes
1246	Male	12-20	Bachelor	Single	Student	Nuclear	<5	<20,000	Rural area	Less accurate	More Positive	Less frequent	Yes	No	No	No	No	No	Agree	Agree	Agree	Agree	Agree	Agree	Yes	Yes	Sometimes	Yes	No	Yes	Yes
1247	Male	12-20	Bachelor	Single	Student	Nuclear	<5	<20,000	Rural area	Less accurate	More Positive	Less frequent	Yes	Yes	No	No	Don't know	No	Agree	Agree	Agree	Agree	Undecided	Agree	Yes	Yes	No	Yes	No	Sometimes	Yes
1248	Male	21-30	Bachelor	Single	Student	Nuclear	<5	<20,000	Urban area	Less accurate	More Positive	Less frequent	Yes	Yes	No	No	No	No	Agree	Agree	Agree	Agree	Agree	Agree	Yes	Yes	Sometimes	Yes	No	Sometimes	Yes
1249	Male	21-30	Intermediate (11-12)	Single	Businessman	Nuclear	<5	<20,000	Rural area	Less accurate	More Positive	Less frequent	Yes	Yes	No	No	Don't know	No	Agree	Agree	Agree	Agree	Agree	Agree	Yes	Yes	Yes	Yes	No	Sometimes	Sometimes
1250	Male	12-20	Bachelor	Single	Student	Nuclear	≥5	<20,000	Urban area	Less accurate	More Positive	Less frequent	Yes	Yes	No	No	No	No	Agree	Agree	Agree	Agree	Agree	Agree	Sometimes	Yes	Sometimes	Yes	Yes	Yes	Yes
1251	Male	21-30	Bachelor	Single	Student	Nuclear	<5	<20,000	Urban area	Less accurate	More Positive	Less frequent	Yes	Yes	No	No	No	No	Agree	Agree	Agree	Agree	Agree	Agree	Sometimes	Yes	Yes	Yes	No	Yes	Yes
1252	Male	21-30	Bachelor	Single	Non-govt. empolyee	Nuclear	≥5	<20,000	Urban area	Less accurate	More Positive	Less frequent	Yes	Yes	No	No	Yes	No	Agree	Agree	Agree	Agree	Agree	Agree	Yes	Yes	Sometimes	Yes	No	Yes	Yes
1253	Male	12-20	Bachelor	Single	Student	Nuclear	≥5	<20,000	Rural area	Less accurate	More Positive	Less frequent	Yes	Yes	No	No	Don't know	Don't know	Agree	Agree	Agree	Agree	Agree	Agree	Yes	Yes	Sometimes	Yes	No	Sometimes	Yes
1254	Male	21-30	Bachelor	Single	Student	Nuclear	<5	<20,000	Rural area	Less accurate	More Positive	Less frequent	Yes	Yes	No	No	No	No	Agree	Agree	Agree	Agree	Agree	Agree	Sometimes	Yes	Sometimes	Sometimes	No	Sometimes	Yes
1255	Male	21-30	Bachelor	Single	Student	Nuclear	<5	<20,000	Urban area	Less accurate	More Positive	Less frequent	Yes	Yes	No	No	No	No	Agree	Agree	Agree	Agree	Agree	Agree	No	Yes	No	Yes	No	Yes	Yes
1256	Male	21-30	Bachelor	Single	Student	Nuclear	<5	<20,000	Rural area	Less accurate	More Positive	Less frequent	Yes	Yes	No	No	No	No	Agree	Agree	Agree	Agree	Agree	Agree	Yes	Yes	No	Yes	No	Yes	Yes
1257	Male	12-20	Bachelor	Single	Student	Nuclear	<5	<20,000	Urban area	Less accurate	More Positive	Less frequent	Yes	Yes	No	No	No	No	Agree	Agree	Agree	Agree	Agree	Agree	No	Yes	No	Yes	No	Yes	Yes
1258	Male	21-30	Bachelor	Single	Student	Nuclear	<5	<20,000	Rural area	Less accurate	More Positive	Less frequent	Yes	Yes	No	No	No	No	Agree	Agree	Agree	Agree	Agree	Agree	Yes	Yes	Sometimes	Yes	No	Yes	Yes
1259	Male	21-30	Highier education (avobe bachelor)	Single	Student	Nuclear	≥5	<20,000	Rural area	Less accurate	More Positive	Less frequent	Yes	No	No	No	No	No	Agree	Agree	Agree	Agree	Agree	Agree	Sometimes	Yes	No	Yes	No	Sometimes	Sometimes
1260	Female	12-20	Intermediate (11-12)	Single	Student	Nuclear	<5	<20,000	Rural area	Less accurate	More Positive	Less frequent	Yes	Yes	No	No	No	No	Agree	Agree	Agree	Agree	Agree	Agree	Yes	Yes	Sometimes	Yes	No	Yes	Yes
1261	Female	12-20	Intermediate (11-12)	Single	Student	Nuclear	<5	<20,000	Rural area	Less accurate	More Positive	Less frequent	Yes	Yes	No	No	No	No	Agree	Agree	Agree	Agree	Undecided	Agree	Yes	Yes	Yes	Yes	No	Sometimes	Yes
1262	Female	12-20	Bachelor	Single	Student	Nuclear	<5	<20,000	Urban area	Less accurate	More Positive	Less frequent	Yes	Yes	No	No	No	No	Agree	Agree	Agree	Agree	Agree	Agree	Yes	Yes	Yes	Yes	No	Sometimes	Yes
1263	Female	21-30	Bachelor	Single	Student	Nuclear	≥5	<20,000	Urban area	Less accurate	More Positive	Less frequent	Yes	Yes	No	No	No	No	Agree	Agree	Agree	Undecided	Agree	Agree	Yes	Yes	Sometimes	Sometimes	No	Sometimes	Sometimes
1264	Female	21-30	Highier education (avobe bachelor)	Single	Student	Nuclear	<5	<20,000	Urban area	Less accurate	More Positive	Less frequent	Yes	Yes	No	No	No	No	Agree	Agree	Agree	Agree	Agree	Agree	Yes	Yes	Sometimes	Yes	No	Yes	Yes
1265	Male	>30	Bachelor	Married	Non-govt. empolyee	Nuclear	<5	<20,000	Rural area	Less accurate	More Positive	Less frequent	Yes	Yes	No	No	No	Yes	Agree	Agree	Agree	Undecided	Agree	Agree	Yes	Yes	Sometimes	Yes	No	Yes	Yes
1266	Male	12-20	Intermediate (11-12)	Single	Student	Join	≥5	<20,000	Urban area	Less accurate	More Positive	Less frequent	Yes	Yes	No	No	Yes	No	Agree	Agree	Agree	Agree	Undecided	Agree	Sometimes	Yes	Sometimes	Yes	No	Sometimes	Sometimes
1267	Male	21-30	Bachelor	Single	Student	Join	<5	<20,000	Urban area	Less accurate	More Positive	Less frequent	Yes	Yes	No	No	No	No	Agree	Agree	Agree	Agree	Agree	Agree	Yes	Yes	Yes	Yes	No	Sometimes	Yes
1268	Male	21-30	Bachelor	Single	Student	Join	≥5	<20,000	Urban area	Less accurate	More Positive	Less frequent	Yes	Yes	No	No	No	No	Agree	Agree	Agree	Agree	Agree	Agree	No	Yes	No	Yes	No	Sometimes	Sometimes
1269	Male	21-30	Bachelor	Single	Student	Join	<5	<20,000	Urban area	Less accurate	More Positive	Less frequent	Yes	Yes	No	No	No	No	Agree	Agree	Agree	Agree	Agree	Agree	Yes	Yes	Sometimes	Yes	No	Yes	Yes
1270	Male	21-30	Bachelor	Single	Student	Join	≥5	<20,000	Rural area	Less accurate	More Positive	Less frequent	Yes	Yes	No	No	Don't know	No	Agree	Agree	Agree	Agree	Agree	Agree	Yes	Yes	Yes	Yes	No	Yes	Sometimes
1271	Male	21-30	Bachelor	Married	Student	Join	≥5	<20,000	Rural area	Less accurate	More Positive	Less frequent	Yes	Yes	No	No	No	No	Agree	Agree	Agree	Agree	Agree	Agree	Yes	Yes	No	Yes	No	Yes	Yes
1272	Male	21-30	Bachelor	Single	Student	Nuclear	<5	20,000-30,000	Rural area	Less accurate	More Positive	Less frequent	Yes	Yes	No	No	No	No	Agree	Agree	Agree	Agree	Agree	Agree	Yes	Yes	Sometimes	Yes	No	Yes	Yes
1273	Male	21-30	Bachelor	Single	Student	Nuclear	<5	20,000-30,000	Rural area	Less accurate	More Positive	Less frequent	Yes	Yes	No	No	No	No	Agree	Agree	Agree	Agree	Agree	Agree	Yes	Yes	Sometimes	Yes	No	Yes	Yes
1274	Male	12-20	Bachelor	Single	Student	Nuclear	<5	20,000-30,000	Rural area	Less accurate	More Positive	Less frequent	Yes	Yes	No	No	Yes	No	Agree	Agree	Agree	Agree	Agree	Agree	Yes	Yes	No	Sometimes	Yes	Sometimes	Sometimes
1275	Male	21-30	Bachelor	Single	Student	Nuclear	<5	20,000-30,000	Rural area	Less accurate	More Positive	Less frequent	Yes	Yes	No	No	No	No	Agree	Agree	Agree	Agree	Undecided	Agree	Yes	Yes	Sometimes	Yes	No	Yes	Yes
1276	Male	12-20	Bachelor	Single	Student	Nuclear	<5	20,000-30,000	Urban area	Less accurate	More Positive	Less frequent	Yes	Yes	No	No	No	No	Agree	Agree	Agree	Agree	Agree	Agree	Yes	Yes	Yes	Yes	No	Sometimes	Yes
1277	Male	21-30	Bachelor	Single	Student	Nuclear	<5	20,000-30,000	Rural area	Less accurate	More Positive	Less frequent	Yes	Yes	No	No	Don't know	No	Agree	Agree	Agree	Agree	Agree	Agree	Yes	Yes	No	Yes	No	Yes	Yes
1278	Male	12-20	Bachelor	Single	Student	Nuclear	≥5	20,000-30,000	Urban area	Less accurate	More Positive	Less frequent	No	Yes	No	No	Yes	No	Agree	Agree	Agree	Agree	Agree	Agree	Sometimes	Yes	Yes	Yes	No	Yes	Yes
1279	Male	21-30	Bachelor	Single	Student	Nuclear	<5	20,000-30,000	Urban area	Less accurate	More Positive	Less frequent	Yes	Don't know	No	No	No	No	Agree	Agree	Agree	Agree	Agree	Agree	Sometimes	Yes	Sometimes	Sometimes	No	Sometimes	Yes
1280	Female	21-30	Highier education (avobe bachelor)	Single	Non-govt. empolyee	Nuclear	<5	20,000-30,000	Rural area	Less accurate	More Positive	Less frequent	Yes	Yes	No	No	Don't know	Don't know	Agree	Agree	Agree	Agree	Undecided	Agree	Yes	Yes	Sometimes	Yes	No	Yes	Yes
1281	Female	21-30	Bachelor	Single	Student	Nuclear	<5	20,000-30,000	Urban area	Less accurate	More Positive	Less frequent	Yes	Yes	No	No	No	No	Agree	Agree	Agree	Agree	Agree	Agree	Yes	Yes	No	Yes	No	Yes	Yes
1282	Female	21-30	Bachelor	Single	Student	Nuclear	<5	20,000-30,000	Rural area	Less accurate	More Positive	Less frequent	Yes	Yes	No	No	No	No	Agree	Agree	Agree	Agree	Agree	Agree	Yes	Yes	Sometimes	Yes	No	Yes	Yes
1283	Female	21-30	Bachelor	Single	Student	Nuclear	<5	20,000-30,000	Rural area	Less accurate	More Positive	Less frequent	Yes	Yes	No	No	Yes	No	Agree	Agree	Agree	Agree	Agree	Agree	Yes	Yes	Sometimes	Yes	No	Yes	Yes
1284	Female	21-30	Bachelor	Single	Unemployment	Nuclear	≥5	20,000-30,000	Rural area	Less accurate	More Positive	Less frequent	Yes	Yes	No	No	No	No	Agree	Agree	Agree	Agree	Agree	Agree	Yes	Yes	Sometimes	Yes	No	Yes	Yes
1285	Female	21-30	Highier education (avobe bachelor)	Single	Student	Nuclear	≥5	20,000-30,000	Urban area	Less accurate	More Positive	Less frequent	Yes	Yes	No	No	No	No	Agree	Agree	Agree	Agree	Agree	Agree	Sometimes	Yes	Yes	Yes	No	Yes	Yes
1286	Female	21-30	Highier education (avobe bachelor)	Single	Student	Nuclear	≥5	20,000-30,000	Urban area	Less accurate	More Positive	Less frequent	Yes	Yes	No	No	No	No	Agree	Agree	Agree	Agree	Agree	Agree	Sometimes	Yes	Yes	Yes	No	Yes	Yes
1287	Female	21-30	Highier education (avobe bachelor)	Single	Unemployment	Nuclear	<5	20,000-30,000	Rural area	Less accurate	More Positive	Less frequent	Yes	Yes	No	No	Don't know	No	Agree	Agree	Agree	Agree	Agree	Agree	Sometimes	Yes	Sometimes	Yes	No	Yes	Yes
1288	Female	21-30	Highier education (avobe bachelor)	Married	Non-govt. empolyee	Nuclear	<5	20,000-30,000	Rural area	Less accurate	More Positive	Less frequent	Yes	Yes	No	No	No	No	Agree	Agree	Agree	Agree	Agree	Agree	Yes	Yes	No	Yes	No	Yes	Yes
1289	Male	21-30	Highier education (avobe bachelor)	Single	Unemployment	Join	≥5	20,000-30,000	Urban area	Less accurate	More Positive	Less frequent	Yes	Yes	No	No	No	No	Agree	Agree	Agree	Agree	Agree	Agree	Yes	Yes	Yes	Sometimes	No	Sometimes	Yes
1290	Male	21-30	Bachelor	Single	Govt. employee	Join	<5	20,000-30,000	Rural area	Less accurate	More Positive	Less frequent	Yes	Yes	No	No	No	No	Agree	Agree	Agree	Agree	Agree	Agree	Yes	Yes	Sometimes	Sometimes	Yes	Yes	No
1291	Male	21-30	Bachelor	Single	Businessman	Join	≥5	20,000-30,000	Rural area	Less accurate	More Positive	Less frequent	Yes	No	No	No	No	No	Agree	Agree	Agree	Agree	Agree	Agree	Yes	Yes	Sometimes	Yes	Yes	Sometimes	Yes
1292	Female	12-20	Bachelor	Single	Student	Join	≥5	20,000-30,000	Rural area	Less accurate	More Positive	Less frequent	Yes	Yes	No	No	No	No	Agree	Agree	Agree	Agree	Agree	Agree	Yes	Yes	Sometimes	Yes	No	Yes	Yes
1293	Female	12-20	Bachelor	Single	Student	Join	≥5	20,000-30,000	Rural area	Less accurate	More Positive	Less frequent	Yes	No	No	No	No	No	Agree	Agree	Agree	Agree	Agree	Agree	Yes	Yes	Sometimes	Yes	No	Yes	Yes
1294	Female	12-20	Bachelor	Single	Student	Join	≥5	20,000-30,000	Urban area	Less accurate	More Positive	Less frequent	Yes	Yes	No	No	No	No	Agree	Agree	Agree	Agree	Undecided	Agree	Yes	Yes	Yes	Yes	No	Sometimes	Yes
1295	Male	>30	Intermediate (11-12)	Married	Businessman	Join	≥5	20,000-30,000	Urban area	Less accurate	More Positive	Less frequent	Yes	Yes	No	No	No	No	Agree	Agree	Agree	Agree	Agree	Agree	No	Yes	Yes	Yes	No	Yes	Yes
1296	Male	21-30	Highier education (avobe bachelor)	Married	Govt. employee	Join	≥5	20,000-30,000	Urban area	Less accurate	More Positive	Less frequent	Yes	Yes	No	No	No	No	Agree	Agree	Agree	Agree	Undecided	Agree	Yes	Yes	Sometimes	Yes	No	Yes	Yes
1297	Male	21-30	Highier education (avobe bachelor)	Married	Non-govt. empolyee	Join	≥5	20,000-30,000	Urban area	Less accurate	More Positive	Less frequent	Yes	Yes	No	No	No	No	Agree	Agree	Agree	Agree	Agree	Agree	Sometimes	Yes	Sometimes	Yes	No	Sometimes	Yes
1298	Female	>30	Highier education (avobe bachelor)	Married	Non-govt. empolyee	Join	≥5	20,000-30,000	Rural area	Less accurate	More Positive	Less frequent	Yes	Yes	No	No	No	No	Agree	Agree	Agree	Agree	Agree	Agree	Yes	Yes	Sometimes	Yes	No	Yes	Yes
1299	Male	21-30	Bachelor	Single	Student	Nuclear	<5	>30,000	Rural area	Less accurate	More Positive	Less frequent	Yes	Yes	No	No	No	No	Agree	Agree	Agree	Agree	Agree	Agree	Yes	Yes	Yes	Yes	No	Yes	Sometimes
1300	Male	12-20	Intermediate (11-12)	Single	Student	Nuclear	<5	>30,000	Urban area	Less accurate	More Positive	Less frequent	Yes	Yes	No	No	No	No	Agree	Agree	Agree	Agree	Agree	Agree	Yes	Yes	Sometimes	Yes	Yes	Yes	Sometimes
1301	Male	12-20	Bachelor	Single	Student	Nuclear	≥5	>30,000	Rural area	Less accurate	More Positive	Less frequent	Yes	Yes	No	No	Yes	No	Agree	Agree	Agree	Agree	Undecided	Agree	Yes	Yes	Sometimes	Yes	No	Sometimes	Yes
1302	Male	21-30	Bachelor	Single	Student	Nuclear	≥5	>30,000	Urban area	Less accurate	More Positive	Less frequent	No	Yes	No	No	Yes	No	Agree	Agree	Agree	Agree	Undecided	Agree	No	Yes	No	Yes	No	Yes	Yes
1303	Male	12-20	Intermediate (11-12)	Single	Student	Nuclear	<5	>30,000	Rural area	Less accurate	More Positive	Less frequent	Yes	Yes	No	No	No	No	Agree	Agree	Agree	Agree	Undecided	Agree	Yes	Yes	Sometimes	Yes	No	Yes	Yes
1304	Male	12-20	Bachelor	Single	Student	Nuclear	<5	>30,000	Rural area	Less accurate	More Positive	Less frequent	Yes	Yes	No	No	No	No	Agree	Agree	Agree	Agree	Undecided	Agree	Yes	Yes	Sometimes	Yes	No	Yes	Yes
1305	Male	12-20	Bachelor	Single	Student	Nuclear	<5	>30,000	Rural area	Less accurate	More Positive	Less frequent	Yes	Yes	No	No	No	No	Agree	Agree	Agree	Agree	Agree	Agree	Yes	Yes	Sometimes	Yes	No	Yes	Yes
1306	Male	21-30	Bachelor	Single	Student	Nuclear	<5	>30,000	Rural area	Less accurate	More Positive	Less frequent	Yes	Yes	No	No	Don't know	No	Agree	Agree	Agree	Agree	Agree	Agree	Sometimes	Yes	No	No	No	Yes	Sometimes
1307	Male	>30	Highier education (avobe bachelor)	Single	Non-govt. empolyee	Nuclear	<5	>30,000	Rural area	Less accurate	More Positive	Less frequent	Yes	Yes	No	No	No	No	Agree	Agree	Agree	Agree	Agree	Agree	Yes	Yes	Sometimes	Yes	No	Yes	Yes
1308	Male	21-30	Bachelor	Single	Non-govt. empolyee	Nuclear	<5	>30,000	Rural area	Less accurate	More Positive	Less frequent	Yes	Yes	No	No	Don't know	No	Agree	Agree	Agree	Agree	Agree	Agree	Yes	Yes	Sometimes	Yes	No	Yes	Yes
1309	Male	21-30	Highier education (avobe bachelor)	Single	Non-govt. empolyee	Nuclear	<5	>30,000	Rural area	Less accurate	More Positive	Less frequent	Yes	Yes	No	No	No	No	Agree	Agree	Agree	Agree	Agree	Agree	Sometimes	Yes	Yes	Yes	No	Yes	Yes
1310	Male	21-30	Bachelor	Single	Businessman	Nuclear	<5	>30,000	Rural area	Less accurate	More Positive	Less frequent	No	Yes	No	No	No	No	Agree	Agree	Agree	Agree	Agree	Agree	Sometimes	Yes	No	Yes	Yes	Yes	Sometimes
1311	Male	21-30	Bachelor	Single	Unemployment	Nuclear	<5	>30,000	Rural area	Less accurate	More Positive	Less frequent	Yes	Yes	No	No	Yes	No	Agree	Agree	Agree	Agree	Agree	Agree	Yes	Yes	Sometimes	Yes	No	Yes	Yes
1312	Male	12-20	Intermediate (11-12)	Single	Student	Nuclear	<5	>30,000	Rural area	Less accurate	More Positive	Less frequent	Yes	Yes	No	No	Don't know	No	Agree	Agree	Agree	Agree	Undecided	Agree	Yes	Yes	Sometimes	Yes	No	Yes	Yes
1313	Male	12-20	Bachelor	Single	Student	Nuclear	≥5	>30,000	Rural area	Less accurate	More Positive	Less frequent	Yes	Yes	No	No	No	No	Agree	Agree	Agree	Agree	Agree	Agree	Sometimes	Yes	Sometimes	Yes	No	Yes	Yes
1314	Male	12-20	Secondary (6-10)	Single	Student	Nuclear	≥5	>30,000	Rural area	Less accurate	More Positive	Less frequent	Yes	No	No	No	No	No	Agree	Agree	Agree	Agree	Agree	Agree	Yes	Yes	Sometimes	Yes	No	Yes	Yes
1315	Male	12-20	Intermediate (11-12)	Single	Student	Nuclear	<5	>30,000	Rural area	Less accurate	More Positive	Less frequent	Yes	Yes	No	No	No	No	Agree	Agree	Agree	Agree	Agree	Agree	No	Yes	No	Yes	No	Sometimes	Yes
1316	Male	12-20	Bachelor	Single	Student	Nuclear	<5	>30,000	Rural area	Less accurate	More Positive	Less frequent	Yes	Yes	No	No	Yes	Yes	Agree	Agree	Agree	Agree	Undecided	Agree	Yes	Yes	Sometimes	Yes	No	Yes	Yes
1317	Male	21-30	Bachelor	Single	Student	Nuclear	<5	>30,000	Rural area	Less accurate	More Positive	Less frequent	Yes	Yes	No	No	No	No	Agree	Agree	Agree	Agree	Agree	Agree	Yes	Yes	Sometimes	Sometimes	No	Yes	Yes
1318	Male	21-30	Bachelor	Single	Non-govt. empolyee	Nuclear	<5	>30,000	Rural area	Less accurate	More Positive	Less frequent	Yes	Yes	No	No	No	No	Agree	Agree	Agree	Agree	Agree	Agree	Yes	Yes	Sometimes	Yes	No	Yes	Yes
1319	Male	12-20	Intermediate (11-12)	Single	Non-govt. empolyee	Nuclear	≥5	>30,000	Rural area	Less accurate	More Positive	Less frequent	Yes	Yes	No	No	No	No	Agree	Agree	Agree	Agree	Agree	Agree	Yes	Yes	No	Sometimes	No	Sometimes	Sometimes
1320	Male	21-30	Highier education (avobe bachelor)	Single	Non-govt. empolyee	Nuclear	<5	>30,000	Urban area	Less accurate	More Positive	Less frequent	Yes	Yes	No	No	No	No	Agree	Agree	Agree	Agree	Agree	Agree	Yes	Yes	Sometimes	Yes	No	Yes	Yes
1321	Male	12-20	Intermediate (11-12)	Single	Student	Nuclear	<5	>30,000	Rural area	Less accurate	More Positive	Less frequent	Yes	Yes	No	No	No	No	Agree	Agree	Agree	Agree	Undecided	Agree	Yes	Yes	Sometimes	Yes	No	Yes	Yes
1322	Male	21-30	Bachelor	Single	Student	Nuclear	<5	>30,000	Rural area	Less accurate	More Positive	Less frequent	Yes	Yes	No	No	No	No	Agree	Agree	Agree	Agree	Agree	Agree	Sometimes	Yes	Sometimes	Yes	No	Yes	Yes
1323	Male	12-20	Bachelor	Single	Student	Nuclear	<5	>30,000	Rural area	Less accurate	More Positive	Less frequent	Yes	Yes	No	No	Yes	No	Agree	Agree	Agree	Agree	Agree	Agree	Sometimes	Yes	Yes	Yes	No	Yes	Yes
1324	Male	21-30	Highier education (avobe bachelor)	Single	Non-govt. empolyee	Nuclear	<5	>30,000	Urban area	Less accurate	More Positive	Less frequent	Yes	Yes	No	No	No	No	Agree	Agree	Agree	Agree	Agree	Agree	Sometimes	Yes	Yes	Yes	No	Yes	Yes
1325	Male	21-30	Bachelor	Single	Non-govt. empolyee	Nuclear	≥5	>30,000	Rural area	Less accurate	More Positive	Less frequent	Yes	Yes	No	No	No	No	Agree	Agree	Agree	Agree	Agree	Agree	Yes	Yes	Sometimes	Yes	No	Yes	Yes
1326	Male	21-30	Highier education (avobe bachelor)	Single	Non-govt. empolyee	Nuclear	≥5	>30,000	Rural area	Less accurate	More Positive	Less frequent	Yes	Yes	No	No	No	No	Agree	Agree	Agree	Agree	Agree	Agree	Sometimes	Yes	Sometimes	Yes	Yes	Yes	Yes
1327	Male	21-30	Highier education (avobe bachelor)	Single	Govt. employee	Nuclear	<5	>30,000	Rural area	Less accurate	More Positive	Less frequent	Yes	Yes	No	No	No	Don't know	Agree	Agree	Agree	Agree	Undecided	Agree	Sometimes	Yes	Sometimes	Yes	No	Sometimes	Yes
1328	Female	12-20	Intermediate (11-12)	Single	Student	Nuclear	<5	>30,000	Rural area	Less accurate	More Positive	Less frequent	Yes	Yes	No	No	Yes	No	Agree	Agree	Agree	Agree	Agree	Agree	Sometimes	Yes	Yes	Yes	No	Yes	Yes
1329	Female	21-30	Bachelor	Single	Student	Nuclear	<5	>30,000	Rural area	Less accurate	More Positive	Less frequent	Yes	Don't know	No	No	Don't know	No	Agree	Agree	Agree	Agree	Undecided	Agree	Yes	Yes	Sometimes	Yes	No	Yes	Yes
1330	Female	>30	Highier education (avobe bachelor)	Single	Non-govt. empolyee	Nuclear	≥5	>30,000	Rural area	Less accurate	More Positive	Less frequent	Yes	Yes	No	No	Don't know	No	Agree	Agree	Agree	Agree	Agree	Agree	Sometimes	Yes	Sometimes	Yes	No	Sometimes	Yes
1331	Female	12-20	Bachelor	Single	Student	Nuclear	<5	>30,000	Rural area	Less accurate	More Positive	Less frequent	Yes	Yes	No	No	No	No	Agree	Agree	Agree	Agree	Agree	Agree	Yes	Yes	Sometimes	Yes	No	Yes	Yes
1332	Female	12-20	Bachelor	Single	Student	Nuclear	<5	>30,000	Rural area	Less accurate	More Positive	Less frequent	Yes	Yes	No	No	No	No	Agree	Agree	Agree	Agree	Undecided	Agree	Yes	Yes	Yes	No	Yes	Sometimes	Yes
1333	Female	21-30	Bachelor	Single	Student	Nuclear	≥5	>30,000	Urban area	Less accurate	More Positive	Less frequent	Yes	No	No	No	No	No	Agree	Agree	Agree	Agree	Undecided	Agree	Sometimes	Yes	Sometimes	Sometimes	No	Sometimes	Yes
1334	Female	21-30	Bachelor	Single	Student	Nuclear	<5	>30,000	Rural area	Less accurate	More Positive	Less frequent	Yes	Yes	No	No	Don't know	No	Agree	Agree	Agree	Agree	Agree	Undecided	Sometimes	Yes	Sometimes	Yes	Yes	Yes	Yes
1335	Female	21-30	Bachelor	Single	Unemployment	Nuclear	<5	>30,000	Rural area	Less accurate	More Positive	Less frequent	Yes	Yes	No	No	No	No	Agree	Agree	Agree	Agree	Agree	Agree	Yes	Yes	No	Yes	No	Yes	Yes
1336	Female	21-30	Bachelor	Single	Student	Nuclear	≥5	>30,000	Rural area	Less accurate	More Positive	Less frequent	Yes	Yes	No	No	No	No	Agree	Agree	Agree	Agree	Agree	Agree	Yes	Yes	Sometimes	Sometimes	No	Yes	Yes
1337	Female	21-30	Bachelor	Single	Student	Nuclear	<5	>30,000	Rural area	Less accurate	More Positive	Less frequent	Yes	Yes	No	No	No	No	Agree	Agree	Agree	Agree	Agree	Agree	Yes	Yes	Sometimes	Yes	No	Yes	Yes
1338	Female	12-20	Intermediate (11-12)	Single	Student	Nuclear	<5	>30,000	Rural area	Less accurate	More Positive	Less frequent	Yes	Yes	No	No	No	No	Agree	Agree	Agree	Agree	Undecided	Agree	Yes	Yes	No	Yes	No	Yes	Yes
1339	Female	21-30	Bachelor	Single	Student	Nuclear	<5	>30,000	Rural area	Less accurate	More Positive	Less frequent	Yes	Yes	No	No	No	No	Agree	Agree	Agree	Agree	Agree	Agree	No	Yes	Sometimes	Yes	No	Sometimes	Yes
1340	Female	21-30	Bachelor	Single	Student	Nuclear	<5	>30,000	Rural area	Less accurate	More Positive	Less frequent	Yes	Yes	No	No	No	No	Agree	Agree	Agree	Agree	Agree	Agree	Yes	Yes	Sometimes	Yes	No	Sometimes	Sometimes
1341	Female	21-30	Highier education (avobe bachelor)	Single	Businessman	Nuclear	<5	>30,000	Rural area	Less accurate	More Positive	Less frequent	Yes	Yes	No	No	No	No	Agree	Agree	Agree	Agree	Agree	Agree	Yes	Yes	Sometimes	Yes	No	Yes	Yes
1342	Female	12-20	Bachelor	Single	Student	Nuclear	<5	>30,000	Rural area	Less accurate	More Positive	Less frequent	Yes	Yes	No	No	No	No	Agree	Agree	Agree	Agree	Agree	Agree	Yes	Yes	Sometimes	Yes	No	Yes	Yes
1343	Female	21-30	Highier education (avobe bachelor)	Single	Non-govt. empolyee	Nuclear	≥5	>30,000	Rural area	Less accurate	More Positive	Less frequent	Yes	No	No	No	No	No	Agree	Agree	Agree	Agree	Agree	Agree	Yes	Yes	Yes	Yes	No	Sometimes	Yes
1344	Male	>30	Highier education (avobe bachelor)	Married	Non-govt. empolyee	Nuclear	<5	>30,000	Rural area	Less accurate	More Positive	Less frequent	Yes	Yes	No	No	No	No	Agree	Agree	Agree	Agree	Agree	Agree	Yes	Yes	Yes	Yes	No	Sometimes	Yes
1345	Male	>30	Highier education (avobe bachelor)	Married	Non-govt. empolyee	Nuclear	<5	>30,000	Rural area	Less accurate	More Positive	Less frequent	Yes	Yes	No	No	Don't know	No	Agree	Agree	Agree	Agree	Agree	Agree	Sometimes	Yes	Sometimes	Yes	Yes	Yes	Yes
1346	Male	>30	Highier education (avobe bachelor)	Married	Non-govt. empolyee	Nuclear	<5	>30,000	Rural area	Less accurate	More Positive	Less frequent	Yes	Yes	No	No	No	No	Agree	Agree	Agree	Agree	Agree	Agree	Yes	Yes	Sometimes	Yes	No	Yes	Yes
1347	Male	21-30	Highier education (avobe bachelor)	Married	Non-govt. empolyee	Nuclear	<5	>30,000	Rural area	Less accurate	More Positive	Less frequent	Yes	Yes	No	No	No	No	Agree	Agree	Agree	Agree	Agree	Agree	Yes	Yes	Sometimes	Yes	No	Yes	Yes
1348	Male	>30	Highier education (avobe bachelor)	Married	Non-govt. empolyee	Nuclear	<5	>30,000	Rural area	Less accurate	More Positive	Less frequent	Yes	Yes	No	No	No	No	Agree	Agree	Agree	Agree	Agree	Agree	Yes	Yes	Yes	Yes	No	Sometimes	Yes
1349	Female	21-30	Highier education (avobe bachelor)	Married	Student	Nuclear	<5	>30,000	Rural area	Less accurate	More Positive	Less frequent	Yes	Yes	No	No	Don't know	Don't know	Agree	Agree	Agree	Agree	Agree	Agree	Yes	Yes	Sometimes	Yes	No	Yes	Yes
1350	Female	>30	Highier education (avobe bachelor)	Married	Housewife	Nuclear	<5	>30,000	Rural area	Less accurate	More Positive	Less frequent	Yes	Yes	No	No	No	No	Agree	Agree	Agree	Agree	Agree	Agree	Sometimes	Yes	Sometimes	Yes	No	Yes	Yes
1351	Female	>30	Highier education (avobe bachelor)	Married	Govt. employee	Nuclear	<5	>30,000	Rural area	Less accurate	More Positive	Less frequent	Yes	Yes	No	No	No	No	Agree	Agree	Agree	Agree	Agree	Agree	Sometimes	Yes	Sometimes	Yes	Yes	Yes	Yes
1352	Female	>30	Highier education (avobe bachelor)	Married	Govt. employee	Nuclear	<5	>30,000	Rural area	Less accurate	More Positive	Less frequent	Yes	Yes	No	No	No	No	Agree	Agree	Agree	Agree	Agree	Agree	Yes	Yes	Yes	Yes	No	Yes	No
1353	Female	21-30	Bachelor	Married	Student	Nuclear	<5	>30,000	Rural area	Less accurate	More Positive	Less frequent	Yes	No	No	No	No	No	Agree	Agree	Agree	Agree	Agree	Agree	Yes	Yes	Sometimes	Sometimes	No	Yes	Yes
1354	Female	21-30	Highier education (avobe bachelor)	Married	Housewife	Nuclear	<5	>30,000	Rural area	Less accurate	More Positive	Less frequent	Yes	Yes	No	No	No	No	Agree	Agree	Agree	Agree	Agree	Agree	Sometimes	Yes	Sometimes	Yes	Yes	Yes	Yes
1355	Female	21-30	Highier education (avobe bachelor)	Married	Housewife	Nuclear	≥5	>30,000	Rural area	Less accurate	More Positive	Less frequent	Yes	No	No	No	No	No	Agree	Agree	Agree	Agree	Agree	Agree	Yes	Yes	Sometimes	Yes	No	Yes	Yes
1356	Female	>30	Highier education (avobe bachelor)	Married	Housewife	Nuclear	<5	>30,000	Rural area	Less accurate	More Positive	Less frequent	Yes	Yes	No	No	Yes	No	Agree	Agree	Agree	Agree	Agree	Agree	Yes	Yes	Sometimes	Yes	No	Yes	No
1357	Male	21-30	Bachelor	Single	Student	Join	≥5	>30,000	Rural area	Less accurate	More Positive	Less frequent	Yes	Yes	No	No	No	No	Agree	Agree	Agree	Agree	Agree	Agree	Yes	Yes	Sometimes	Yes	No	Sometimes	Yes
1358	Male	21-30	Bachelor	Single	Student	Join	≥5	>30,000	Rural area	Less accurate	More Positive	Less frequent	Yes	Yes	No	No	Don't know	No	Agree	Agree	Agree	Agree	Undecided	Agree	Sometimes	Yes	Sometimes	Yes	No	Yes	Yes
1359	Male	21-30	Bachelor	Single	Non-govt. empolyee	Join	≥5	>30,000	Urban area	Less accurate	More Positive	Less frequent	Yes	Yes	No	No	Yes	No	Agree	Agree	Agree	Agree	Agree	Agree	Yes	Yes	Yes	Yes	No	Sometimes	Sometimes
1360	Male	21-30	Highier education (avobe bachelor)	Single	Non-govt. empolyee	Join	≥5	>30,000	Rural area	Less accurate	More Positive	Less frequent	Yes	Yes	No	No	No	No	Agree	Agree	Agree	Agree	Agree	Agree	Sometimes	Yes	Yes	Yes	Yes	Yes	Sometimes
1361	Male	21-30	Highier education (avobe bachelor)	Single	Non-govt. empolyee	Join	≥5	>30,000	Rural area	Less accurate	More Positive	Less frequent	Yes	Yes	No	No	No	No	Agree	Agree	Agree	Agree	Agree	Agree	Sometimes	Yes	Yes	Yes	Yes	Yes	Sometimes
1362	Female	21-30	Intermediate (11-12)	Single	Student	Join	≥5	>30,000	Rural area	Less accurate	More Positive	Less frequent	Yes	Don't know	No	No	Yes	No	Agree	Agree	Agree	Agree	Agree	Agree	Sometimes	Yes	Sometimes	Yes	Yes	Yes	Yes
1363	Female	12-20	Bachelor	Single	Student	Join	≥5	>30,000	Urban area	Less accurate	More Positive	Less frequent	Yes	Yes	No	No	No	No	Agree	Agree	Agree	Agree	Agree	Agree	Yes	Yes	Sometimes	Yes	Yes	Sometimes	Sometimes
1364	Male	21-30	Bachelor	Married	Student	Join	≥5	>30,000	Rural area	Less accurate	More Positive	Less frequent	Yes	Yes	No	No	No	No	Agree	Agree	Agree	Undecided	Agree	Agree	Yes	Yes	Sometimes	Yes	No	Yes	Yes
1365	Male	>30	Bachelor	Married	Businessman	Join	<5	>30,000	Rural area	Less accurate	More Positive	Less frequent	Yes	Yes	No	No	Don't know	No	Agree	Agree	Agree	Agree	Undecided	Agree	Sometimes	Yes	Sometimes	Yes	Yes	Sometimes	Yes
1366	Female	21-30	Bachelor	Married	Student	Join	<5	>30,000	Urban area	Less accurate	More Positive	Less frequent	Yes	Yes	No	No	No	No	Agree	Agree	Agree	Agree	Agree	Agree	Yes	Yes	Yes	Yes	No	Sometimes	Yes
1367	Female	21-30	Highier education (avobe bachelor)	Married	Non-govt. empolyee	Join	≥5	>30,000	Rural area	Less accurate	More Positive	Less frequent	Yes	Yes	No	No	No	No	Agree	Agree	Agree	Agree	Agree	Agree	Yes	Yes	Sometimes	Yes	No	Sometimes	Sometimes
1368	Male	12-20	Bachelor	Single	Student	Nuclear	<5	<20,000	Urban area	Less accurate	More Positive	Less frequent	Yes	Yes	No	No	No	No	Agree	Agree	Agree	Agree	Agree	Agree	No	No	No	No	Yes	Sometimes	Sometimes
1369	Male	21-30	Highier education (avobe bachelor)	Single	Student	Nuclear	<5	<20,000	Urban area	Less accurate	More Positive	Less frequent	Yes	Yes	No	No	No	No	Agree	Agree	Agree	Agree	Agree	Agree	Sometimes	Sometimes	Sometimes	Yes	Yes	Yes	Yes
1370	Male	12-20	Intermediate (11-12)	Single	Student	Nuclear	<5	<20,000	Rural area	Less accurate	More Positive	Less frequent	Yes	Yes	No	No	No	No	Agree	Agree	Agree	Agree	Agree	Agree	Yes	Sometimes	Sometimes	Yes	No	Sometimes	Yes
1371	Male	12-20	Bachelor	Single	Student	Nuclear	<5	<20,000	Urban area	Less accurate	More Positive	Less frequent	Yes	Yes	No	No	No	No	Agree	Agree	Agree	Agree	Undecided	Agree	No	Sometimes	No	No	No	No	No
1372	Female	21-30	Intermediate (11-12)	Single	Student	Nuclear	<5	<20,000	Urban area	Less accurate	More Positive	Less frequent	Don't know	Don't know	No	No	No	No	Agree	Agree	Agree	Agree	Agree	Agree	Sometimes	Sometimes	Sometimes	Yes	No	Sometimes	Yes
1373	Male	12-20	Bachelor	Single	Student	Join	<5	<20,000	Urban area	Less accurate	More Positive	Less frequent	Yes	Yes	No	No	No	No	Agree	Agree	Agree	Agree	Agree	Agree	Sometimes	Sometimes	Sometimes	Sometimes	No	Sometimes	Sometimes
1374	Male	12-20	Bachelor	Single	Student	Nuclear	<5	20,000-30,000	Rural area	Less accurate	More Positive	Less frequent	Yes	Yes	No	No	Don't know	No	Agree	Agree	Agree	Agree	Agree	Agree	Sometimes	Sometimes	Sometimes	Yes	No	Sometimes	Sometimes
1375	Male	21-30	Bachelor	Single	Student	Nuclear	<5	20,000-30,000	Rural area	Less accurate	More Positive	Less frequent	Yes	Yes	No	No	Yes	No	Agree	Agree	Agree	Agree	Agree	Agree	Yes	Sometimes	No	Yes	No	Sometimes	Yes
1376	Male	21-30	Bachelor	Married	Non-govt. empolyee	Nuclear	<5	20,000-30,000	Rural area	Less accurate	More Positive	Less frequent	Yes	Yes	No	No	No	No	Agree	Agree	Agree	Agree	Agree	Agree	Sometimes	Sometimes	Sometimes	Yes	Yes	Sometimes	Yes
1377	Female	21-30	Intermediate (11-12)	Married	Student	Nuclear	<5	20,000-30,000	Rural area	Less accurate	More Positive	Less frequent	Yes	Yes	No	No	No	No	Agree	Agree	Agree	Undecided	Agree	Agree	Sometimes	Sometimes	No	Yes	Yes	Sometimes	Yes
1378	Female	12-20	Bachelor	Single	Student	Join	≥5	20,000-30,000	Urban area	Less accurate	More Positive	Less frequent	Yes	Yes	No	No	No	No	Agree	Agree	Agree	Agree	Agree	Agree	Yes	Sometimes	No	Yes	No	Yes	Yes
1379	Male	21-30	Bachelor	Single	Non-govt. empolyee	Nuclear	≥5	>30,000	Urban area	Less accurate	More Positive	Less frequent	Yes	Yes	No	No	Don't know	No	Agree	Agree	Agree	Agree	Undecided	Agree	Sometimes	Sometimes	Sometimes	Sometimes	No	Yes	Sometimes
1380	Male	21-30	Bachelor	Single	Student	Nuclear	<5	>30,000	Rural area	Less accurate	More Positive	Less frequent	Yes	Don't know	No	No	No	No	Agree	Agree	Agree	Agree	Agree	Agree	Sometimes	Sometimes	Yes	Yes	Yes	Yes	Yes
1381	Male	21-30	Bachelor	Single	Govt. employee	Join	≥5	>30,000	Urban area	Less accurate	More Positive	Less frequent	Yes	Yes	No	No	Yes	No	Agree	Agree	Agree	Agree	Agree	Agree	Yes	Sometimes	Sometimes	Yes	Yes	Sometimes	Yes
1382	Male	>30	Bachelor	Married	Non-govt. empolyee	Join	≥5	>30,000	Rural area	Less accurate	More Positive	Less frequent	Yes	Yes	No	No	Yes	No	Agree	Agree	Agree	Agree	Agree	Agree	Yes	Sometimes	Yes	Yes	Yes	Sometimes	Yes
1383	Male	21-30	Highier education (avobe bachelor)	Married	Govt. employee	Join	≥5	>30,000	Urban area	Less accurate	More Positive	Less frequent	No	Yes	No	No	No	No	Agree	Agree	Agree	Agree	Agree	Agree	Yes	Sometimes	Sometimes	Yes	No	Sometimes	Yes
1384	Male	21-30	Intermediate (11-12)	Single	Non-govt. empolyee	Nuclear	<5	<20,000	Rural area	Less accurate	More Positive	More frequent	Yes	Yes	No	No	No	No	Agree	Agree	Agree	Agree	Agree	Agree	Yes	Yes	Yes	Yes	Yes	Yes	Yes
1385	Male	21-30	Bachelor	Single	Student	Nuclear	≥5	<20,000	Urban area	Less accurate	More Positive	More frequent	No	No	No	No	Yes	No	Agree	Agree	Agree	Agree	Agree	Agree	Sometimes	Yes	Yes	Yes	Yes	Yes	Yes
1386	Male	21-30	Bachelor	Single	Businessman	Nuclear	<5	<20,000	Rural area	Less accurate	More Positive	More frequent	Yes	Yes	No	No	No	No	Agree	Agree	Agree	Agree	Agree	Agree	Yes	Yes	Sometimes	Yes	Yes	Yes	Yes
1387	Male	21-30	Bachelor	Single	Student	Nuclear	<5	<20,000	Rural area	Less accurate	More Positive	More frequent	Yes	No	No	No	No	No	Agree	Agree	Agree	Agree	Undecided	Agree	Yes	Yes	Yes	Yes	No	Yes	Yes
1388	Male	21-30	Bachelor	Single	Student	Nuclear	<5	<20,000	Urban area	Less accurate	More Positive	More frequent	Yes	Yes	No	No	No	No	Agree	Agree	Agree	Agree	Agree	Undecided	Yes	Yes	Yes	Yes	No	Yes	Yes
1389	Male	21-30	Bachelor	Single	Student	Nuclear	<5	<20,000	Urban area	Less accurate	More Positive	More frequent	Yes	Yes	No	No	No	No	Agree	Agree	Agree	Agree	Agree	Agree	Yes	Yes	Yes	Yes	Yes	Yes	Yes
1390	Male	21-30	Bachelor	Single	Student	Nuclear	<5	<20,000	Urban area	Less accurate	More Positive	More frequent	Yes	Yes	No	No	No	No	Agree	Agree	Agree	Agree	Agree	Agree	Yes	Yes	Yes	Yes	No	Yes	Yes
1391	Male	12-20	Bachelor	Single	Student	Nuclear	<5	<20,000	Rural area	Less accurate	More Positive	More frequent	Yes	Yes	No	No	No	No	Agree	Agree	Agree	Agree	Agree	Agree	Yes	Yes	Yes	Yes	Yes	Yes	Yes
1392	Male	21-30	Bachelor	Single	Student	Nuclear	<5	<20,000	Rural area	Less accurate	More Positive	More frequent	No	No	No	No	No	No	Agree	Agree	Agree	Agree	Agree	Agree	Yes	Yes	Yes	Yes	No	Yes	Yes
1393	Male	12-20	Bachelor	Single	Student	Nuclear	<5	<20,000	Urban area	Less accurate	More Positive	More frequent	Yes	Yes	No	No	No	No	Agree	Agree	Agree	Agree	Agree	Agree	Yes	Yes	Yes	Yes	Yes	Sometimes	Yes
1394	Male	21-30	Bachelor	Single	Unemployment	Nuclear	<5	<20,000	Urban area	Less accurate	More Positive	More frequent	Yes	Yes	No	No	No	No	Agree	Agree	Agree	Agree	Agree	Agree	Yes	Yes	Yes	Yes	No	Yes	Yes
1395	Male	21-30	Bachelor	Single	Student	Nuclear	<5	<20,000	Rural area	Less accurate	More Positive	More frequent	Yes	Yes	No	No	Yes	No	Agree	Agree	Agree	Agree	Agree	Agree	Yes	Yes	Yes	Yes	Yes	Yes	Yes
1396	Male	21-30	Bachelor	Single	Student	Nuclear	<5	<20,000	Rural area	Less accurate	More Positive	More frequent	Yes	No	No	No	No	No	Agree	Agree	Agree	Agree	Agree	Agree	Yes	Yes	Yes	Yes	No	Yes	Yes
1397	Male	12-20	Intermediate (11-12)	Single	Student	Nuclear	<5	<20,000	Urban area	Less accurate	More Positive	More frequent	Yes	Yes	No	No	No	No	Agree	Agree	Agree	Agree	Agree	Agree	Yes	Yes	Yes	Yes	Yes	Yes	Yes
1398	Male	21-30	Highier education (avobe bachelor)	Single	Student	Nuclear	≥5	<20,000	Urban area	Less accurate	More Positive	More frequent	Yes	Yes	No	No	No	No	Agree	Agree	Agree	Agree	Agree	Agree	Sometimes	Yes	Yes	Yes	Yes	Yes	Yes
1399	Male	21-30	Bachelor	Single	Student	Nuclear	<5	<20,000	Rural area	Less accurate	More Positive	More frequent	No	No	No	No	Yes	Yes	Agree	Agree	Agree	Agree	Agree	Agree	Yes	Yes	Yes	Yes	Yes	Yes	Yes
1400	Male	21-30	Bachelor	Single	Student	Nuclear	<5	<20,000	Rural area	Less accurate	More Positive	More frequent	Yes	Yes	No	No	Don't know	No	Agree	Agree	Agree	Agree	Agree	Agree	Yes	Yes	Sometimes	Yes	Yes	Yes	Yes
1401	Male	21-30	Bachelor	Single	Student	Nuclear	<5	<20,000	Rural area	Less accurate	More Positive	More frequent	Yes	Yes	No	No	No	No	Agree	Agree	Agree	Agree	Agree	Agree	Sometimes	Yes	Yes	Yes	Yes	Yes	Yes
1402	Male	21-30	Highier education (avobe bachelor)	Single	Non-govt. empolyee	Nuclear	<5	<20,000	Rural area	Less accurate	More Positive	More frequent	Yes	Yes	No	No	Don't know	No	Agree	Agree	Agree	Agree	Agree	Agree	Yes	Yes	Yes	Yes	Yes	Yes	Yes
1403	Male	21-30	Intermediate (11-12)	Single	Student	Nuclear	<5	<20,000	Urban area	Less accurate	More Positive	More frequent	Yes	Yes	No	No	No	No	Agree	Agree	Agree	Agree	Agree	Agree	Yes	Yes	Yes	Yes	No	Yes	Yes
1404	Female	12-20	Bachelor	Single	Student	Nuclear	<5	<20,000	Rural area	Less accurate	More Positive	More frequent	Yes	Don't know	No	No	No	No	Agree	Agree	Agree	Agree	Agree	Agree	Yes	Yes	Yes	Yes	No	Yes	Yes
1405	Female	21-30	Highier education (avobe bachelor)	Single	Student	Nuclear	<5	<20,000	Rural area	Less accurate	More Positive	More frequent	Yes	Yes	No	No	No	No	Agree	Agree	Agree	Agree	Agree	Agree	Yes	Yes	Yes	Yes	Yes	Yes	Yes
1406	Female	12-20	Bachelor	Single	Student	Nuclear	≥5	<20,000	Rural area	Less accurate	More Positive	More frequent	Yes	Yes	No	No	No	No	Agree	Agree	Agree	Agree	Agree	Agree	Yes	Yes	Yes	Yes	No	Yes	Yes
1407	Female	21-30	Bachelor	Single	Student	Nuclear	<5	<20,000	Rural area	Less accurate	More Positive	More frequent	Yes	Yes	No	No	No	No	Agree	Agree	Agree	Agree	Agree	Agree	Yes	Yes	Yes	Yes	No	Yes	Yes
1408	Female	21-30	Bachelor	Single	Student	Nuclear	<5	<20,000	Rural area	Less accurate	More Positive	More frequent	Yes	Yes	No	No	No	No	Agree	Agree	Agree	Agree	Agree	Agree	Yes	Yes	Yes	Yes	No	Yes	Yes
1409	Female	12-20	Bachelor	Single	Student	Nuclear	<5	<20,000	Rural area	Less accurate	More Positive	More frequent	Yes	Yes	No	No	No	No	Agree	Agree	Agree	Agree	Agree	Agree	Yes	Yes	Yes	Yes	Yes	Yes	Yes
1410	Male	21-30	Bachelor	Married	Student	Nuclear	≥5	<20,000	Rural area	Less accurate	More Positive	More frequent	Yes	Yes	No	No	Yes	No	Agree	Agree	Agree	Agree	Undecided	Agree	Yes	Yes	Yes	Yes	Yes	Yes	Yes
1411	Male	21-30	Highier education (avobe bachelor)	Married	Student	Nuclear	<5	<20,000	Rural area	Less accurate	More Positive	More frequent	Yes	Yes	No	No	No	No	Agree	Agree	Agree	Agree	Agree	Agree	Yes	Yes	Yes	Sometimes	Yes	Yes	Yes
1412	Female	21-30	Highier education (avobe bachelor)	Married	Govt. employee	Nuclear	<5	<20,000	Rural area	Less accurate	More Positive	More frequent	Yes	Yes	No	No	No	No	Agree	Agree	Agree	Agree	Agree	Agree	Sometimes	Yes	Yes	Yes	Yes	Yes	Yes
1413	Female	21-30	Bachelor	Married	Housewife	Nuclear	<5	<20,000	Rural area	Less accurate	More Positive	More frequent	Yes	Yes	No	No	No	No	Agree	Agree	Agree	Agree	Agree	Agree	Yes	Yes	Yes	Yes	Yes	Yes	Yes
1414	Male	21-30	Bachelor	Single	Student	Join	≥5	<20,000	Urban area	Less accurate	More Positive	More frequent	Yes	Yes	No	No	No	No	Agree	Agree	Agree	Agree	Agree	Agree	Yes	Yes	Yes	Yes	Yes	Yes	Yes
1415	Male	21-30	Intermediate (11-12)	Single	Non-govt. empolyee	Join	≥5	<20,000	Urban area	Less accurate	More Positive	More frequent	Yes	Yes	No	No	No	Yes	Agree	Agree	Agree	Agree	Undecided	Agree	Yes	Yes	Yes	Yes	Yes	Yes	Yes
1416	Male	12-20	Intermediate (11-12)	Single	Student	Join	<5	<20,000	Rural area	Less accurate	More Positive	More frequent	Yes	Yes	No	No	No	No	Agree	Agree	Agree	Agree	Agree	Agree	Yes	Yes	Yes	Yes	No	Yes	Yes
1417	Female	12-20	Bachelor	Single	Student	Join	<5	<20,000	Rural area	Less accurate	More Positive	More frequent	Yes	Yes	No	No	No	No	Agree	Agree	Agree	Agree	Agree	Agree	Yes	Yes	Yes	Yes	No	Yes	Yes
1418	Female	21-30	Bachelor	Single	Student	Join	≥5	<20,000	Rural area	Less accurate	More Positive	More frequent	Yes	No	No	No	No	No	Agree	Agree	Agree	Agree	Agree	Agree	Yes	Yes	Yes	Yes	Yes	Yes	Yes
1419	Male	12-20	Bachelor	Married	Student	Join	≥5	<20,000	Urban area	Less accurate	More Positive	More frequent	Yes	Yes	No	No	No	No	Agree	Agree	Agree	Agree	Agree	Agree	Yes	Yes	Yes	Yes	Yes	Yes	Yes
1420	Male	21-30	Bachelor	Married	Student	Join	<5	<20,000	Rural area	Less accurate	More Positive	More frequent	Yes	Yes	No	No	No	No	Agree	Agree	Agree	Agree	Agree	Agree	Yes	Yes	Yes	Yes	No	Yes	Yes
1421	Male	21-30	Intermediate (11-12)	Single	Student	Nuclear	≥5	20,000-30,000	Urban area	Less accurate	More Positive	More frequent	Yes	Yes	No	No	No	No	Agree	Agree	Agree	Agree	Agree	Agree	Yes	Yes	Yes	Yes	Yes	Yes	Yes
1422	Male	12-20	Bachelor	Single	Student	Nuclear	<5	20,000-30,000	Rural area	Less accurate	More Positive	More frequent	Yes	Yes	No	No	Don't know	No	Agree	Agree	Agree	Agree	Undecided	Agree	Yes	Yes	Yes	Yes	No	Yes	Yes
1423	Male	21-30	Intermediate (11-12)	Single	Student	Nuclear	<5	20,000-30,000	Rural area	Less accurate	More Positive	More frequent	Yes	Yes	No	No	No	No	Agree	Agree	Agree	Agree	Agree	Agree	Yes	Yes	Yes	Yes	No	Yes	Yes
1424	Male	12-20	Bachelor	Single	Student	Nuclear	<5	20,000-30,000	Rural area	Less accurate	More Positive	More frequent	Yes	Yes	No	No	Yes	No	Agree	Agree	Agree	Agree	Agree	Agree	Yes	Yes	Yes	Yes	Yes	Yes	Yes
1425	Male	21-30	Bachelor	Single	Student	Nuclear	<5	20,000-30,000	Rural area	Less accurate	More Positive	More frequent	Yes	Yes	No	No	No	Don't know	Agree	Agree	Agree	Agree	Undecided	Agree	Yes	Yes	Yes	Yes	No	Yes	Yes
1426	Male	12-20	Bachelor	Single	Student	Nuclear	<5	20,000-30,000	Urban area	Less accurate	More Positive	More frequent	Yes	Yes	No	No	No	No	Agree	Agree	Agree	Agree	Agree	Agree	Yes	Yes	Yes	Yes	No	Yes	Yes
1427	Male	21-30	Bachelor	Single	Student	Nuclear	<5	20,000-30,000	Urban area	Less accurate	More Positive	More frequent	Yes	Yes	No	No	No	No	Agree	Agree	Agree	Agree	Agree	Agree	Yes	Yes	Yes	Yes	No	Yes	Yes
1428	Male	21-30	Bachelor	Single	Student	Nuclear	<5	20,000-30,000	Rural area	Less accurate	More Positive	More frequent	Yes	Yes	No	No	Don't know	Yes	Agree	Agree	Agree	Agree	Agree	Agree	Yes	Yes	Yes	Yes	Yes	Yes	Yes
1429	Male	21-30	Bachelor	Single	Student	Nuclear	<5	20,000-30,000	Urban area	Less accurate	More Positive	More frequent	Yes	Yes	No	No	No	No	Agree	Agree	Agree	Agree	Agree	Agree	Yes	Yes	Yes	Yes	No	Yes	Yes
1430	Male	21-30	Highier education (avobe bachelor)	Single	Student	Nuclear	<5	20,000-30,000	Rural area	Less accurate	More Positive	More frequent	Yes	Yes	No	No	No	No	Agree	Agree	Agree	Agree	Agree	Agree	Yes	Yes	Sometimes	Yes	Yes	Yes	Yes
1431	Male	21-30	Bachelor	Single	Student	Nuclear	<5	20,000-30,000	Rural area	Less accurate	More Positive	More frequent	Yes	Yes	No	No	Yes	No	Agree	Agree	Agree	Agree	Agree	Agree	Yes	Yes	Yes	Yes	Yes	Yes	Yes
1432	Male	21-30	Bachelor	Single	Student	Nuclear	<5	20,000-30,000	Rural area	Less accurate	More Positive	More frequent	Yes	Yes	No	No	No	No	Agree	Agree	Agree	Agree	Agree	Agree	Yes	Yes	Yes	Yes	Yes	Yes	Yes
1433	Male	21-30	Bachelor	Single	Student	Nuclear	≥5	20,000-30,000	Rural area	Less accurate	More Positive	More frequent	Yes	Yes	No	No	Yes	No	Agree	Agree	Agree	Agree	Agree	Agree	Yes	Yes	Yes	Yes	Yes	Yes	Yes
1434	Male	21-30	Bachelor	Single	Student	Nuclear	<5	20,000-30,000	Rural area	Less accurate	More Positive	More frequent	Yes	Yes	No	No	No	No	Agree	Agree	Agree	Agree	Agree	Agree	Yes	Yes	Yes	Yes	No	Yes	Yes
1435	Male	12-20	Bachelor	Single	Student	Nuclear	<5	20,000-30,000	Urban area	Less accurate	More Positive	More frequent	Yes	Yes	No	No	No	No	Agree	Agree	Agree	Agree	Agree	Agree	Yes	Yes	Yes	Yes	Yes	Yes	Yes
1436	Male	12-20	Bachelor	Single	Student	Nuclear	<5	20,000-30,000	Urban area	Less accurate	More Positive	More frequent	Yes	Yes	No	No	No	No	Agree	Agree	Agree	Agree	Agree	Agree	Yes	Yes	Sometimes	Yes	Yes	Yes	Yes
1437	Male	12-20	Bachelor	Single	Student	Nuclear	≥5	20,000-30,000	Urban area	Less accurate	More Positive	More frequent	Yes	Yes	No	No	No	No	Agree	Agree	Agree	Agree	Agree	Agree	Yes	Yes	Yes	Yes	No	Yes	Yes
1438	Male	12-20	Intermediate (11-12)	Single	Student	Nuclear	<5	20,000-30,000	Rural area	Less accurate	More Positive	More frequent	Yes	Yes	No	No	No	No	Agree	Agree	Agree	Agree	Agree	Agree	Yes	Yes	Yes	Yes	Yes	Yes	Yes
1439	Male	21-30	Highier education (avobe bachelor)	Single	Non-govt. empolyee	Nuclear	<5	20,000-30,000	Rural area	Less accurate	More Positive	More frequent	Yes	Yes	No	No	Yes	No	Agree	Agree	Agree	Agree	Agree	Agree	Yes	Yes	Yes	Yes	Yes	Yes	Yes
1440	Male	12-20	Bachelor	Single	Student	Nuclear	<5	20,000-30,000	Rural area	Less accurate	More Positive	More frequent	Yes	Yes	No	No	No	No	Agree	Agree	Agree	Agree	Agree	Agree	Yes	Yes	Yes	Yes	No	Yes	Yes
1441	Male	21-30	Highier education (avobe bachelor)	Single	Student	Nuclear	<5	20,000-30,000	Rural area	Less accurate	More Positive	More frequent	Yes	Yes	No	No	No	No	Agree	Agree	Agree	Agree	Undecided	Agree	Yes	Yes	Yes	Yes	Yes	Yes	Yes
1442	Male	21-30	Bachelor	Single	Student	Nuclear	<5	20,000-30,000	Rural area	Less accurate	More Positive	More frequent	Yes	Yes	No	No	Don't know	No	Agree	Agree	Agree	Agree	Agree	Agree	Yes	Yes	Yes	Yes	No	Yes	Yes
1443	Male	21-30	Bachelor	Single	Student	Nuclear	<5	20,000-30,000	Rural area	Less accurate	More Positive	More frequent	Yes	Yes	No	No	No	No	Agree	Agree	Agree	Agree	Agree	Agree	Yes	Yes	Yes	Yes	Yes	Yes	Yes
1444	Male	12-20	Bachelor	Single	Student	Nuclear	<5	20,000-30,000	Rural area	Less accurate	More Positive	More frequent	Yes	Yes	No	No	Yes	No	Agree	Agree	Agree	Agree	Agree	Agree	Yes	Yes	Yes	Yes	Yes	Yes	Yes
1445	Male	12-20	Intermediate (11-12)	Single	Student	Nuclear	<5	20,000-30,000	Urban area	Less accurate	More Positive	More frequent	Yes	Yes	No	No	No	No	Agree	Agree	Agree	Agree	Agree	Agree	Yes	Yes	Yes	Yes	Yes	Yes	Yes
1446	Male	12-20	Intermediate (11-12)	Single	Student	Nuclear	<5	20,000-30,000	Urban area	Less accurate	More Positive	More frequent	No	No	No	No	Yes	No	Agree	Agree	Agree	Agree	Agree	Agree	Yes	Yes	Yes	Yes	No	Yes	Yes
1447	Male	21-30	Highier education (avobe bachelor)	Single	Student	Nuclear	<5	20,000-30,000	Urban area	Less accurate	More Positive	More frequent	Yes	Yes	No	No	No	No	Agree	Agree	Agree	Agree	Agree	Agree	Yes	Yes	Yes	Yes	Yes	Yes	Yes
1448	Male	21-30	Bachelor	Single	Student	Nuclear	<5	20,000-30,000	Rural area	Less accurate	More Positive	More frequent	Yes	Yes	No	No	No	No	Agree	Agree	Agree	Agree	Agree	Agree	Yes	Yes	Yes	Yes	No	Yes	Yes
1449	Male	21-30	Highier education (avobe bachelor)	Single	Govt. employee	Nuclear	<5	20,000-30,000	Rural area	Less accurate	More Positive	More frequent	Yes	Yes	No	No	No	No	Agree	Agree	Agree	Agree	Agree	Agree	Yes	Yes	Yes	Yes	Yes	Yes	Yes
1450	Female	12-20	Bachelor	Single	Student	Nuclear	<5	20,000-30,000	Urban area	Less accurate	More Positive	More frequent	Yes	No	No	No	No	No	Agree	Agree	Agree	Agree	Agree	Agree	Yes	Yes	Yes	Yes	No	Yes	Yes
1451	Female	12-20	Intermediate (11-12)	Single	Student	Nuclear	<5	20,000-30,000	Urban area	Less accurate	More Positive	More frequent	Yes	Yes	No	No	No	No	Agree	Agree	Agree	Agree	Agree	Agree	Yes	Yes	Yes	Yes	No	Yes	Yes
1452	Female	21-30	Bachelor	Single	Student	Nuclear	<5	20,000-30,000	Rural area	Less accurate	More Positive	More frequent	Yes	Yes	No	No	No	No	Agree	Agree	Agree	Agree	Agree	Agree	Sometimes	Yes	Yes	Yes	Yes	Yes	Yes
1453	Female	21-30	Highier education (avobe bachelor)	Single	Non-govt. empolyee	Nuclear	<5	20,000-30,000	Rural area	Less accurate	More Positive	More frequent	Yes	Yes	No	No	No	No	Agree	Agree	Agree	Agree	Agree	Agree	Yes	Yes	Yes	Yes	No	Yes	Yes
1454	Female	21-30	Bachelor	Single	Student	Nuclear	<5	20,000-30,000	Rural area	Less accurate	More Positive	More frequent	Yes	Yes	No	No	No	No	Agree	Agree	Agree	Agree	Agree	Agree	Yes	Yes	Yes	Yes	No	Yes	Yes
1455	Female	21-30	Bachelor	Single	Student	Nuclear	<5	20,000-30,000	Rural area	Less accurate	More Positive	More frequent	Yes	Yes	No	No	No	No	Agree	Agree	Agree	Agree	Agree	Agree	Yes	Yes	Yes	Yes	Yes	Yes	Yes
1456	Female	>30	Bachelor	Single	Non-govt. empolyee	Nuclear	<5	20,000-30,000	Rural area	Less accurate	More Positive	More frequent	Yes	Don't know	No	No	No	No	Agree	Agree	Agree	Agree	Agree	Agree	Yes	Yes	No	Yes	Yes	Yes	Yes
1457	Female	21-30	Bachelor	Single	Student	Nuclear	<5	20,000-30,000	Rural area	Less accurate	More Positive	More frequent	Yes	Yes	No	No	Yes	No	Agree	Agree	Agree	Agree	Agree	Agree	Yes	Yes	Yes	Yes	Yes	Yes	Yes
1458	Female	12-20	Bachelor	Single	Student	Nuclear	<5	20,000-30,000	Rural area	Less accurate	More Positive	More frequent	Yes	Yes	No	No	Yes	No	Agree	Agree	Agree	Agree	Undecided	Agree	Yes	Yes	Yes	Yes	No	Yes	Yes
1459	Female	21-30	Bachelor	Single	Student	Nuclear	<5	20,000-30,000	Rural area	Less accurate	More Positive	More frequent	Yes	Yes	No	No	Yes	No	Agree	Agree	Agree	Agree	Agree	Agree	Yes	Yes	Sometimes	Yes	Yes	Yes	Yes
1460	Female	21-30	Bachelor	Single	Student	Nuclear	≥5	20,000-30,000	Urban area	Less accurate	More Positive	More frequent	Yes	Yes	No	No	Yes	No	Agree	Agree	Agree	Agree	Agree	Agree	Yes	Yes	Yes	Yes	No	Yes	Yes
1461	Female	12-20	Bachelor	Single	Student	Nuclear	<5	20,000-30,000	Rural area	Less accurate	More Positive	More frequent	Yes	Yes	No	No	No	No	Agree	Agree	Agree	Agree	Agree	Agree	Yes	Yes	Yes	Yes	No	Yes	Yes
1462	Female	12-20	Bachelor	Single	Student	Nuclear	<5	20,000-30,000	Rural area	Less accurate	More Positive	More frequent	Yes	Yes	No	No	No	No	Agree	Agree	Agree	Agree	Agree	Agree	Yes	Yes	Yes	Yes	No	Yes	Yes
1463	Female	21-30	Highier education (avobe bachelor)	Single	Govt. employee	Nuclear	<5	20,000-30,000	Urban area	Less accurate	More Positive	More frequent	Yes	Yes	No	No	No	No	Agree	Agree	Agree	Agree	Agree	Agree	Yes	Yes	Yes	Yes	Yes	Yes	Yes
1464	Female	21-30	Bachelor	Single	Student	Nuclear	<5	20,000-30,000	Rural area	Less accurate	More Positive	More frequent	Yes	Yes	No	No	No	No	Agree	Agree	Agree	Agree	Agree	Agree	Yes	Yes	Yes	Yes	No	Yes	Yes
1465	Female	21-30	Bachelor	Single	Student	Nuclear	<5	20,000-30,000	Rural area	Less accurate	More Positive	More frequent	Yes	Yes	No	No	No	No	Agree	Agree	Agree	Agree	Agree	Agree	Yes	Yes	Yes	Yes	No	Yes	Yes
1466	Female	21-30	Highier education (avobe bachelor)	Single	Non-govt. empolyee	Nuclear	<5	20,000-30,000	Rural area	Less accurate	More Positive	More frequent	Yes	Yes	No	No	No	No	Agree	Agree	Agree	Agree	Agree	Agree	Yes	Yes	Yes	Yes	Yes	Yes	Yes
1467	Female	>30	Bachelor	Single	Student	Nuclear	<5	20,000-30,000	Rural area	Less accurate	More Positive	More frequent	Yes	Yes	No	No	No	No	Agree	Agree	Agree	Agree	Agree	Agree	Yes	Yes	Yes	Yes	No	Yes	Yes
1468	Male	>30	Highier education (avobe bachelor)	Married	Govt. employee	Nuclear	<5	20,000-30,000	Rural area	Less accurate	More Positive	More frequent	Yes	Yes	No	No	Yes	No	Agree	Agree	Agree	Agree	Agree	Agree	Yes	Yes	Yes	Yes	Yes	Yes	Yes
1469	Male	>30	Bachelor	Married	Non-govt. empolyee	Nuclear	<5	20,000-30,000	Rural area	Less accurate	More Positive	More frequent	Yes	Yes	No	No	No	No	Agree	Agree	Agree	Agree	Agree	Agree	Yes	Yes	Sometimes	Yes	Yes	Yes	Yes
1470	Male	21-30	Highier education (avobe bachelor)	Married	Non-govt. empolyee	Nuclear	<5	20,000-30,000	Rural area	Less accurate	More Positive	More frequent	Yes	Yes	No	No	No	No	Agree	Agree	Agree	Agree	Agree	Agree	Yes	Yes	Sometimes	Yes	Yes	Yes	Yes
1471	Male	>30	Intermediate (11-12)	Married	Govt. employee	Nuclear	<5	20,000-30,000	Rural area	Less accurate	More Positive	More frequent	Yes	Yes	No	No	No	No	Agree	Agree	Agree	Agree	Agree	Undecided	Yes	Yes	Yes	Yes	No	Yes	Yes
1472	Female	21-30	Highier education (avobe bachelor)	Married	Housewife	Nuclear	<5	20,000-30,000	Urban area	Less accurate	More Positive	More frequent	Yes	Yes	No	No	No	No	Agree	Agree	Agree	Agree	Agree	Agree	Yes	Yes	Yes	Yes	No	Yes	Yes
1473	Male	21-30	Bachelor	Single	Student	Join	<5	20,000-30,000	Rural area	Less accurate	More Positive	More frequent	Yes	Yes	No	No	Yes	No	Agree	Agree	Agree	Agree	Agree	Agree	Yes	Yes	Yes	Yes	No	Yes	Yes
1474	Male	21-30	Bachelor	Single	Student	Join	≥5	20,000-30,000	Rural area	Less accurate	More Positive	More frequent	Yes	Yes	No	No	No	No	Agree	Agree	Agree	Agree	Agree	Agree	Yes	Yes	Yes	Yes	No	Yes	Yes
1475	Male	>30	Highier education (avobe bachelor)	Single	Businessman	Join	<5	20,000-30,000	Rural area	Less accurate	More Positive	More frequent	Yes	No	No	No	No	No	Agree	Agree	Agree	Agree	Agree	Agree	Yes	Yes	Yes	Yes	Yes	Yes	Yes
1476	Male	21-30	Intermediate (11-12)	Single	Student	Join	≥5	20,000-30,000	Rural area	Less accurate	More Positive	More frequent	Yes	Yes	No	No	No	No	Agree	Agree	Agree	Agree	Agree	Agree	Yes	Yes	Yes	Yes	No	Yes	Yes
1477	Male	21-30	Bachelor	Single	Non-govt. empolyee	Join	≥5	20,000-30,000	Rural area	Less accurate	More Positive	More frequent	Yes	Yes	No	No	No	No	Agree	Agree	Agree	Agree	Agree	Agree	Yes	Yes	Yes	Yes	Yes	Yes	Yes
1478	Female	21-30	Bachelor	Single	Student	Join	≥5	20,000-30,000	Rural area	Less accurate	More Positive	More frequent	Yes	Yes	No	No	No	No	Agree	Agree	Agree	Agree	Agree	Agree	Yes	Yes	Yes	Yes	No	Yes	Yes
1479	Female	21-30	Bachelor	Single	Student	Join	≥5	20,000-30,000	Rural area	Less accurate	More Positive	More frequent	Yes	Yes	No	No	No	No	Agree	Agree	Agree	Agree	Agree	Agree	Yes	Yes	Yes	Yes	Yes	Yes	Yes
1480	Male	>30	Highier education (avobe bachelor)	Married	Businessman	Join	<5	20,000-30,000	Rural area	Less accurate	More Positive	More frequent	Yes	Yes	No	No	No	No	Agree	Agree	Agree	Agree	Agree	Agree	Yes	Yes	Yes	Yes	Yes	Yes	Yes
1481	Male	>30	Bachelor	Married	Non-govt. empolyee	Join	<5	20,000-30,000	Rural area	Less accurate	More Positive	More frequent	Yes	Yes	No	No	No	No	Agree	Agree	Agree	Agree	Undecided	Agree	Yes	Yes	Sometimes	Yes	Yes	Yes	Yes
1482	Female	21-30	Bachelor	Married	Housewife	Join	≥5	20,000-30,000	Urban area	Less accurate	More Positive	More frequent	Yes	Yes	No	No	No	No	Agree	Agree	Agree	Undecided	Agree	Agree	Yes	Yes	Yes	Yes	Yes	Yes	Yes
1483	Female	21-30	Bachelor	Married	Housewife	Join	<5	20,000-30,000	Rural area	Less accurate	More Positive	More frequent	Yes	Yes	No	No	No	No	Agree	Agree	Agree	Agree	Agree	Agree	Yes	Yes	Yes	Yes	No	Yes	Yes
1484	Male	21-30	Bachelor	Single	Student	Nuclear	≥5	>30,000	Rural area	Less accurate	More Positive	More frequent	Yes	Yes	No	No	No	No	Agree	Agree	Agree	Agree	Agree	Agree	Yes	Yes	Yes	Yes	No	Yes	Yes
1485	Male	21-30	Bachelor	Single	Student	Nuclear	≥5	>30,000	Rural area	Less accurate	More Positive	More frequent	Yes	Yes	No	No	Yes	No	Agree	Agree	Agree	Agree	Agree	Agree	Yes	Yes	Yes	Yes	Yes	Yes	Yes
1486	Male	12-20	Bachelor	Single	Student	Nuclear	<5	>30,000	Rural area	Less accurate	More Positive	More frequent	Yes	Yes	No	No	Yes	No	Agree	Agree	Agree	Agree	Agree	Agree	Yes	Yes	Yes	Yes	No	Yes	Yes
1487	Male	21-30	Bachelor	Single	Student	Nuclear	<5	>30,000	Rural area	Less accurate	More Positive	More frequent	Yes	Yes	No	No	No	No	Agree	Agree	Agree	Agree	Agree	Agree	Yes	Yes	Yes	Yes	No	Yes	Yes
1488	Male	12-20	Bachelor	Single	Student	Nuclear	<5	>30,000	Rural area	Less accurate	More Positive	More frequent	Yes	Yes	No	No	No	No	Agree	Agree	Agree	Agree	Agree	Agree	Yes	Yes	Yes	Yes	No	Yes	Yes
1489	Male	21-30	Highier education (avobe bachelor)	Single	Govt. employee	Nuclear	<5	>30,000	Rural area	Less accurate	More Positive	More frequent	Yes	Yes	No	No	Yes	No	Agree	Agree	Agree	Agree	Agree	Agree	Yes	Yes	No	Yes	Yes	Yes	Yes
1490	Male	12-20	Bachelor	Single	Student	Nuclear	<5	>30,000	Rural area	Less accurate	More Positive	More frequent	Yes	Yes	No	No	No	No	Agree	Agree	Agree	Agree	Agree	Agree	Yes	Yes	Yes	Yes	No	Yes	Yes
1491	Male	12-20	Bachelor	Single	Student	Nuclear	<5	>30,000	Rural area	Less accurate	More Positive	More frequent	Yes	Yes	No	No	No	No	Agree	Agree	Agree	Agree	Agree	Agree	Yes	Yes	Yes	Yes	Yes	Yes	Yes
1492	Male	21-30	Bachelor	Single	Unemployment	Nuclear	<5	>30,000	Rural area	Less accurate	More Positive	More frequent	Yes	Yes	No	No	No	No	Agree	Agree	Agree	Agree	Agree	Agree	Yes	Yes	Yes	Yes	No	Yes	Yes
1493	Male	>30	Bachelor	Single	Govt. employee	Nuclear	<5	>30,000	Rural area	Less accurate	More Positive	More frequent	Yes	Yes	No	No	No	No	Agree	Agree	Agree	Agree	Agree	Agree	Yes	Yes	Yes	Yes	No	Yes	Yes
1494	Male	21-30	Intermediate (11-12)	Single	Student	Nuclear	<5	>30,000	Rural area	Less accurate	More Positive	More frequent	Yes	Yes	No	No	No	No	Agree	Agree	Agree	Agree	Agree	Agree	Yes	Yes	Sometimes	Yes	Yes	Yes	Yes
1495	Male	21-30	Bachelor	Single	Student	Nuclear	<5	>30,000	Urban area	Less accurate	More Positive	More frequent	Yes	Yes	No	No	No	No	Agree	Agree	Agree	Agree	Agree	Agree	Yes	Yes	Yes	Yes	Yes	Yes	Yes
1496	Male	21-30	Bachelor	Single	Student	Nuclear	<5	>30,000	Rural area	Less accurate	More Positive	More frequent	Yes	Yes	No	No	No	No	Agree	Agree	Agree	Agree	Agree	Agree	Yes	Yes	Yes	Yes	Yes	Yes	Yes
1497	Male	12-20	Secondary (6-10)	Single	Student	Nuclear	<5	>30,000	Rural area	Less accurate	More Positive	More frequent	Yes	Yes	No	No	Don't know	No	Agree	Agree	Agree	Agree	Agree	Agree	Yes	Yes	Yes	Yes	No	Yes	Yes
1498	Male	21-30	Highier education (avobe bachelor)	Single	Govt. employee	Nuclear	<5	>30,000	Rural area	Less accurate	More Positive	More frequent	Yes	Yes	No	No	No	No	Agree	Agree	Agree	Agree	Agree	Agree	Yes	Yes	Yes	Yes	Yes	Yes	Yes
1499	Male	21-30	Bachelor	Single	Student	Nuclear	<5	>30,000	Rural area	Less accurate	More Positive	More frequent	Yes	Yes	No	No	Yes	No	Agree	Agree	Agree	Agree	Agree	Agree	Yes	Yes	Yes	Yes	Yes	Yes	Yes
1500	Male	21-30	Bachelor	Single	Non-govt. empolyee	Nuclear	<5	>30,000	Rural area	Less accurate	More Positive	More frequent	Yes	Yes	No	No	No	No	Agree	Agree	Agree	Agree	Agree	Agree	Yes	Yes	Yes	Yes	No	Yes	Yes
1501	Male	21-30	Bachelor	Single	Student	Nuclear	<5	>30,000	Rural area	Less accurate	More Positive	More frequent	Yes	Yes	No	No	No	No	Agree	Agree	Agree	Agree	Agree	Agree	Yes	Yes	No	Yes	Yes	Yes	Yes
1502	Male	21-30	Highier education (avobe bachelor)	Single	Non-govt. empolyee	Nuclear	<5	>30,000	Rural area	Less accurate	More Positive	More frequent	Yes	Yes	No	No	No	No	Agree	Agree	Agree	Agree	Agree	Agree	Yes	Yes	Yes	Yes	Yes	Yes	Yes
1503	Male	12-20	Bachelor	Single	Student	Nuclear	≥5	>30,000	Rural area	Less accurate	More Positive	More frequent	Yes	Yes	No	No	Yes	No	Agree	Agree	Agree	Agree	Agree	Agree	Yes	Yes	Yes	Yes	No	Yes	Yes
1504	Male	21-30	Bachelor	Single	Student	Nuclear	≥5	>30,000	Urban area	Less accurate	More Positive	More frequent	Yes	Yes	No	No	Yes	No	Agree	Agree	Agree	Agree	Agree	Agree	Yes	Yes	Yes	Yes	No	Yes	Yes
1505	Male	12-20	Bachelor	Single	Student	Nuclear	<5	>30,000	Rural area	Less accurate	More Positive	More frequent	Yes	Yes	No	No	No	No	Agree	Agree	Agree	Agree	Agree	Agree	No	Yes	Yes	Yes	Yes	Yes	Yes
1506	Male	21-30	Bachelor	Single	Student	Nuclear	<5	>30,000	Rural area	Less accurate	More Positive	More frequent	Yes	Yes	No	No	No	No	Agree	Agree	Agree	Agree	Agree	Agree	Yes	Yes	Yes	Yes	No	Yes	Yes
1507	Male	21-30	Bachelor	Single	Non-govt. empolyee	Nuclear	<5	>30,000	Rural area	Less accurate	More Positive	More frequent	Yes	Yes	No	No	No	No	Agree	Agree	Agree	Agree	Agree	Agree	Yes	Yes	Sometimes	Yes	Yes	Yes	Yes
1508	Male	21-30	Bachelor	Single	Student	Nuclear	<5	>30,000	Rural area	Less accurate	More Positive	More frequent	Yes	Yes	No	No	No	No	Agree	Agree	Agree	Agree	Undecided	Agree	Yes	Yes	Yes	Yes	No	Yes	Yes
1509	Male	21-30	Bachelor	Single	Student	Nuclear	<5	>30,000	Rural area	Less accurate	More Positive	More frequent	Yes	Yes	No	No	No	No	Agree	Agree	Agree	Agree	Agree	Agree	Yes	Yes	Yes	Yes	Yes	Yes	Yes
1510	Male	>30	Bachelor	Single	Non-govt. empolyee	Nuclear	<5	>30,000	Rural area	Less accurate	More Positive	More frequent	Yes	Yes	No	No	No	No	Agree	Agree	Agree	Agree	Agree	Agree	Yes	Yes	Yes	Yes	Yes	Yes	Yes
1511	Male	21-30	Highier education (avobe bachelor)	Single	Non-govt. empolyee	Nuclear	<5	>30,000	Rural area	More accurate	More Positive	More frequent	Yes	No	No	No	Yes	No	Agree	Agree	Agree	Agree	Agree	Agree	Yes	Yes	Yes	Yes	Yes	Yes	Yes
1512	Male	21-30	Bachelor	Single	Student	Nuclear	<5	>30,000	Rural area	Less accurate	More Positive	More frequent	Yes	Yes	No	No	Don't know	No	Agree	Agree	Agree	Agree	Agree	Agree	Yes	Yes	Yes	Yes	Yes	Yes	Yes
1513	Male	21-30	Highier education (avobe bachelor)	Single	Non-govt. empolyee	Nuclear	<5	>30,000	Rural area	Less accurate	More Positive	More frequent	Yes	Yes	No	No	No	No	Agree	Agree	Agree	Agree	Agree	Agree	Yes	Yes	Yes	Yes	No	Yes	Yes
1514	Male	21-30	Highier education (avobe bachelor)	Single	Govt. employee	Nuclear	<5	>30,000	Rural area	Less accurate	More Positive	More frequent	Yes	Yes	No	No	No	No	Agree	Agree	Agree	Agree	Agree	Agree	Yes	Yes	Yes	Yes	Yes	Yes	Yes
1515	Male	21-30	Highier education (avobe bachelor)	Single	Businessman	Nuclear	≥5	>30,000	Urban area	Less accurate	More Positive	More frequent	Yes	Yes	No	No	No	No	Agree	Agree	Agree	Agree	Agree	Agree	Yes	Yes	Yes	Yes	No	Yes	Yes
1516	Female	12-20	Bachelor	Single	Student	Nuclear	<5	>30,000	Rural area	Less accurate	More Positive	More frequent	Yes	Yes	No	No	No	No	Agree	Agree	Agree	Agree	Agree	Agree	Yes	Yes	Sometimes	Yes	Yes	Yes	Yes
1517	Female	12-20	Bachelor	Single	Student	Nuclear	<5	>30,000	Rural area	Less accurate	More Positive	More frequent	Yes	Yes	No	No	No	No	Agree	Agree	Agree	Agree	Agree	Agree	Yes	Yes	Yes	Yes	No	Yes	Yes
1518	Female	12-20	Bachelor	Single	Student	Nuclear	<5	>30,000	Rural area	Less accurate	More Positive	More frequent	Yes	Yes	No	No	No	No	Agree	Agree	Agree	Agree	Agree	Agree	Yes	Yes	Yes	Yes	No	Yes	Yes
1519	Female	12-20	Intermediate (11-12)	Single	Student	Nuclear	<5	>30,000	Rural area	Less accurate	More Positive	More frequent	Yes	Yes	No	No	No	No	Agree	Agree	Agree	Agree	Agree	Agree	Yes	Yes	Yes	Yes	Yes	Yes	Yes
1520	Female	12-20	Bachelor	Single	Student	Nuclear	<5	>30,000	Rural area	Less accurate	More Positive	More frequent	Yes	Yes	No	No	No	No	Agree	Agree	Agree	Agree	Agree	Agree	Yes	Yes	Yes	Yes	No	Yes	Yes
1521	Female	12-20	Bachelor	Single	Student	Nuclear	<5	>30,000	Rural area	Less accurate	More Positive	More frequent	Yes	Yes	No	No	No	No	Agree	Agree	Agree	Agree	Agree	Agree	Yes	Yes	Yes	Yes	No	Yes	Yes
1522	Female	12-20	Bachelor	Single	Student	Nuclear	<5	>30,000	Rural area	Less accurate	More Positive	More frequent	Yes	Yes	No	No	Don't know	Yes	Agree	Agree	Agree	Agree	Agree	Agree	Yes	Yes	Yes	Yes	No	Yes	Yes
1523	Female	21-30	Bachelor	Single	Student	Nuclear	<5	>30,000	Urban area	Less accurate	More Positive	More frequent	Yes	Yes	No	No	Don't know	No	Agree	Agree	Agree	Agree	Undecided	Agree	Yes	Yes	Yes	Yes	Yes	Yes	Yes
1524	Female	12-20	Bachelor	Single	Student	Nuclear	<5	>30,000	Rural area	Less accurate	More Positive	More frequent	Yes	Yes	No	No	No	No	Agree	Agree	Agree	Agree	Agree	Agree	Yes	Yes	Yes	Yes	Yes	Yes	Yes
1525	Female	12-20	Bachelor	Single	Student	Nuclear	<5	>30,000	Rural area	Less accurate	More Positive	More frequent	Yes	Yes	No	No	No	No	Agree	Agree	Agree	Agree	Agree	Agree	Yes	Yes	Yes	Yes	No	Yes	Yes
1526	Female	21-30	Bachelor	Single	Student	Nuclear	<5	>30,000	Rural area	Less accurate	More Positive	More frequent	Yes	Don't know	No	No	No	No	Agree	Agree	Agree	Agree	Agree	Agree	Yes	Yes	Yes	Yes	No	Yes	Yes
1527	Female	12-20	Bachelor	Single	Student	Nuclear	<5	>30,000	Rural area	Less accurate	More Positive	More frequent	Yes	Yes	No	No	No	No	Agree	Agree	Agree	Agree	Agree	Agree	Yes	Yes	Sometimes	Yes	Yes	Yes	Yes
1528	Female	12-20	Intermediate (11-12)	Single	Student	Nuclear	<5	>30,000	Rural area	Less accurate	More Positive	More frequent	Yes	Yes	No	No	Yes	No	Agree	Agree	Agree	Agree	Agree	Agree	Yes	Yes	Yes	Yes	No	Yes	Yes
1529	Female	21-30	Bachelor	Single	Student	Nuclear	<5	>30,000	Urban area	Less accurate	More Positive	More frequent	Yes	Yes	No	No	No	No	Agree	Agree	Agree	Agree	Undecided	Agree	Yes	Yes	Yes	Yes	No	Yes	Yes
1530	Female	21-30	Bachelor	Single	Student	Nuclear	<5	>30,000	Rural area	Less accurate	More Positive	More frequent	Yes	Yes	No	No	No	No	Agree	Agree	Agree	Agree	Agree	Agree	Sometimes	Yes	Yes	Yes	Yes	Yes	Yes
1531	Female	12-20	Bachelor	Single	Student	Nuclear	<5	>30,000	Rural area	Less accurate	More Positive	More frequent	Yes	Yes	No	No	No	No	Agree	Agree	Agree	Agree	Agree	Agree	Yes	Yes	Sometimes	Yes	Yes	Yes	Yes
1532	Female	12-20	Bachelor	Single	Student	Nuclear	<5	>30,000	Rural area	Less accurate	More Positive	More frequent	Yes	Yes	No	No	No	No	Agree	Agree	Agree	Agree	Agree	Agree	Yes	Yes	Sometimes	Yes	Yes	Yes	Yes
1533	Female	21-30	Highier education (avobe bachelor)	Single	Student	Nuclear	<5	>30,000	Rural area	Less accurate	More Positive	More frequent	Yes	Yes	No	No	No	No	Agree	Agree	Agree	Agree	Agree	Agree	Yes	Yes	Yes	Yes	No	Yes	Yes
1534	Female	21-30	Highier education (avobe bachelor)	Single	Govt. employee	Nuclear	≥5	>30,000	Rural area	Less accurate	More Positive	More frequent	Yes	Yes	No	No	No	No	Agree	Agree	Agree	Agree	Agree	Agree	Yes	Yes	Sometimes	Yes	Yes	Yes	Yes
1535	Female	21-30	Highier education (avobe bachelor)	Single	Student	Nuclear	<5	>30,000	Rural area	Less accurate	More Positive	More frequent	Yes	No	No	No	No	No	Agree	Agree	Agree	Agree	Agree	Agree	Yes	Yes	Yes	Yes	Yes	Yes	Yes
1536	Female	12-20	Bachelor	Single	Student	Nuclear	<5	>30,000	Rural area	Less accurate	More Positive	More frequent	Yes	Yes	No	No	No	No	Agree	Agree	Agree	Agree	Agree	Agree	Yes	Yes	Yes	Yes	Yes	Yes	Yes
1537	Female	21-30	Highier education (avobe bachelor)	Single	Non-govt. empolyee	Nuclear	<5	>30,000	Rural area	Less accurate	More Positive	More frequent	Yes	Yes	No	No	No	No	Agree	Agree	Agree	Agree	Agree	Agree	Yes	Yes	Yes	Yes	No	Yes	Yes
1538	Female	21-30	Highier education (avobe bachelor)	Single	Student	Nuclear	≥5	>30,000	Rural area	Less accurate	More Positive	More frequent	Yes	Yes	No	No	Don't know	No	Agree	Agree	Agree	Agree	Agree	Agree	Yes	Yes	Yes	Yes	No	Yes	Yes
1539	Female	>30	Highier education (avobe bachelor)	Single	Govt. employee	Nuclear	≥5	>30,000	Rural area	Less accurate	More Positive	More frequent	Yes	Yes	No	No	No	No	Agree	Agree	Agree	Agree	Agree	Agree	Yes	Yes	Yes	Yes	Yes	Yes	Yes
1540	Female	21-30	Highier education (avobe bachelor)	Single	Govt. employee	Nuclear	<5	>30,000	Urban area	Less accurate	More Positive	More frequent	Yes	Yes	No	No	No	No	Agree	Agree	Agree	Agree	Agree	Agree	Yes	Yes	Yes	Yes	Yes	Yes	Yes
1541	Female	21-30	Highier education (avobe bachelor)	Single	Govt. employee	Nuclear	<5	>30,000	Rural area	Less accurate	More Positive	More frequent	Yes	Yes	No	No	No	No	Agree	Agree	Agree	Agree	Agree	Agree	Yes	Yes	Yes	Yes	Yes	Yes	Yes
1542	Male	21-30	Highier education (avobe bachelor)	Married	Govt. employee	Nuclear	<5	>30,000	Rural area	Less accurate	More Positive	More frequent	No	Yes	No	No	No	No	Agree	Agree	Agree	Agree	Agree	Agree	Yes	Yes	Yes	Yes	No	Yes	Yes
1543	Male	>30	Highier education (avobe bachelor)	Married	Govt. employee	Nuclear	<5	>30,000	Rural area	Less accurate	More Positive	More frequent	Yes	Yes	No	No	No	No	Agree	Agree	Agree	Agree	Agree	Agree	Yes	Yes	Yes	Yes	No	Yes	Yes
1544	Male	>30	Highier education (avobe bachelor)	Married	Businessman	Nuclear	<5	>30,000	Rural area	Less accurate	More Positive	More frequent	Yes	Yes	No	No	No	No	Agree	Agree	Agree	Agree	Agree	Agree	Yes	Yes	Sometimes	Yes	Yes	Yes	Yes
1545	Male	>30	Highier education (avobe bachelor)	Married	Non-govt. empolyee	Nuclear	<5	>30,000	Rural area	Less accurate	More Positive	More frequent	Yes	Yes	No	No	No	No	Agree	Agree	Agree	Agree	Agree	Agree	Yes	Yes	Yes	Yes	Yes	Yes	Yes
1546	Male	21-30	Highier education (avobe bachelor)	Married	Non-govt. empolyee	Nuclear	<5	>30,000	Rural area	Less accurate	More Positive	More frequent	Yes	Yes	No	No	No	No	Agree	Agree	Agree	Agree	Agree	Agree	Yes	Yes	Sometimes	Yes	Yes	Yes	Yes
1547	Male	>30	Highier education (avobe bachelor)	Married	Non-govt. empolyee	Nuclear	<5	>30,000	Rural area	Less accurate	More Positive	More frequent	No	Yes	No	No	No	No	Agree	Agree	Agree	Agree	Agree	Agree	Yes	Yes	Yes	Yes	Yes	Yes	Yes
1548	Male	>30	Highier education (avobe bachelor)	Married	Non-govt. empolyee	Nuclear	<5	>30,000	Rural area	Less accurate	More Positive	More frequent	Yes	Yes	No	No	No	No	Agree	Agree	Agree	Agree	Agree	Agree	Yes	Yes	Yes	Yes	Yes	Yes	Yes
1549	Male	>30	Highier education (avobe bachelor)	Married	Non-govt. empolyee	Nuclear	<5	>30,000	Rural area	Less accurate	More Positive	More frequent	Yes	Yes	No	No	No	No	Agree	Agree	Agree	Agree	Agree	Agree	Yes	Yes	Yes	Yes	No	Yes	Yes
1550	Male	21-30	Bachelor	Married	Non-govt. empolyee	Nuclear	<5	>30,000	Rural area	Less accurate	More Positive	More frequent	Yes	Yes	No	No	No	No	Agree	Agree	Agree	Agree	Agree	Agree	Yes	Yes	Yes	Sometimes	Yes	Yes	Yes
1551	Male	21-30	Highier education (avobe bachelor)	Married	Non-govt. empolyee	Nuclear	<5	>30,000	Rural area	Less accurate	More Positive	More frequent	Yes	Yes	No	No	No	No	Agree	Agree	Agree	Agree	Agree	Agree	Yes	Yes	Yes	Yes	No	Yes	Yes
1552	Male	21-30	Bachelor	Married	Non-govt. empolyee	Nuclear	<5	>30,000	Rural area	Less accurate	More Positive	More frequent	Yes	Yes	No	No	No	No	Agree	Agree	Agree	Agree	Agree	Agree	Yes	Yes	Yes	Yes	Yes	Yes	Yes
1553	Male	>30	Highier education (avobe bachelor)	Married	Non-govt. empolyee	Nuclear	<5	>30,000	Rural area	Less accurate	More Positive	More frequent	Yes	Yes	No	No	No	No	Agree	Agree	Agree	Agree	Agree	Agree	Yes	Yes	Yes	Yes	Yes	Yes	Yes
1554	Female	21-30	Bachelor	Married	Housewife	Nuclear	<5	>30,000	Rural area	Less accurate	More Positive	More frequent	Yes	Yes	No	No	No	No	Agree	Agree	Agree	Agree	Agree	Agree	Yes	Yes	Yes	Yes	Yes	Yes	Yes
1555	Female	21-30	Highier education (avobe bachelor)	Married	Housewife	Nuclear	<5	>30,000	Rural area	Less accurate	More Positive	More frequent	Yes	Yes	No	No	Yes	No	Agree	Agree	Agree	Agree	Agree	Agree	Yes	Yes	Sometimes	Yes	Yes	Yes	Yes
1556	Female	>30	Highier education (avobe bachelor)	Married	Govt. employee	Nuclear	<5	>30,000	Rural area	Less accurate	More Positive	More frequent	Yes	Yes	No	No	Don't know	No	Agree	Agree	Agree	Agree	Agree	Agree	Yes	Yes	No	Yes	Yes	Yes	Yes
1557	Female	21-30	Highier education (avobe bachelor)	Married	Housewife	Nuclear	<5	>30,000	Rural area	Less accurate	More Positive	More frequent	No	No	No	No	No	No	Agree	Agree	Agree	Agree	Agree	Agree	Yes	Yes	Yes	Yes	No	Yes	Yes
1558	Female	21-30	Bachelor	Married	Housewife	Nuclear	<5	>30,000	Urban area	Less accurate	More Positive	More frequent	Yes	Yes	No	No	No	No	Agree	Agree	Agree	Agree	Agree	Agree	Yes	Yes	Yes	Yes	Yes	Yes	Yes
1559	Female	21-30	Bachelor	Married	Student	Nuclear	<5	>30,000	Rural area	Less accurate	More Positive	More frequent	Yes	Yes	No	No	No	No	Agree	Agree	Agree	Agree	Agree	Agree	Yes	Yes	Yes	Yes	No	Yes	Yes
1560	Female	21-30	Highier education (avobe bachelor)	Married	Housewife	Nuclear	<5	>30,000	Urban area	Less accurate	More Positive	More frequent	Yes	Yes	No	No	No	No	Agree	Agree	Agree	Agree	Agree	Agree	Yes	Yes	Yes	Yes	No	Yes	Yes
1561	Female	21-30	Highier education (avobe bachelor)	Married	Housewife	Nuclear	<5	>30,000	Rural area	Less accurate	More Positive	More frequent	Yes	Yes	No	No	No	No	Agree	Agree	Agree	Agree	Agree	Agree	Yes	Yes	Sometimes	Yes	Yes	Yes	Yes
1562	Female	21-30	Highier education (avobe bachelor)	Married	Businessman	Nuclear	<5	>30,000	Rural area	Less accurate	More Positive	More frequent	Yes	Yes	No	No	No	No	Agree	Agree	Agree	Agree	Undecided	Agree	Yes	Yes	Yes	Yes	Yes	Yes	Yes
1563	Female	21-30	Highier education (avobe bachelor)	Married	Non-govt. empolyee	Nuclear	<5	>30,000	Rural area	Less accurate	More Positive	More frequent	Yes	Yes	No	No	No	No	Agree	Agree	Agree	Agree	Agree	Agree	Yes	Yes	Sometimes	Yes	Yes	Yes	Yes
1564	Female	21-30	Highier education (avobe bachelor)	Married	Non-govt. empolyee	Nuclear	<5	>30,000	Rural area	Less accurate	More Positive	More frequent	Yes	No	No	No	Don't know	No	Agree	Agree	Agree	Agree	Agree	Agree	Yes	Yes	Yes	Yes	Yes	Yes	Yes
1565	Male	21-30	Highier education (avobe bachelor)	Single	Businessman	Join	≥5	>30,000	Rural area	Less accurate	More Positive	More frequent	Yes	Yes	No	No	No	No	Agree	Agree	Agree	Agree	Agree	Agree	Yes	Yes	Yes	Yes	Yes	Yes	Yes
1566	Male	21-30	Highier education (avobe bachelor)	Single	Student	Join	≥5	>30,000	Rural area	Less accurate	More Positive	More frequent	Yes	Yes	No	No	No	No	Agree	Agree	Agree	Agree	Agree	Agree	Yes	Yes	Yes	Yes	No	Yes	Yes
1567	Male	12-20	Bachelor	Single	Student	Join	≥5	>30,000	Rural area	Less accurate	More Positive	More frequent	Don't know	Yes	No	No	Yes	No	Agree	Agree	Agree	Agree	Agree	Agree	Yes	Yes	Yes	Yes	No	Yes	Yes
1568	Male	21-30	Highier education (avobe bachelor)	Single	Non-govt. empolyee	Join	<5	>30,000	Rural area	Less accurate	More Positive	More frequent	Yes	Yes	No	No	No	No	Agree	Agree	Agree	Agree	Agree	Agree	Yes	Yes	Yes	Yes	Yes	Yes	Yes
1569	Male	21-30	Highier education (avobe bachelor)	Single	Student	Join	≥5	>30,000	Rural area	Less accurate	More Positive	More frequent	Yes	Yes	No	No	Don't know	No	Agree	Agree	Agree	Agree	Agree	Agree	Yes	Yes	Sometimes	Yes	Yes	Yes	Yes
1570	Male	21-30	Bachelor	Single	Non-govt. empolyee	Join	≥5	>30,000	Rural area	Less accurate	More Positive	More frequent	Yes	Yes	No	No	No	No	Agree	Agree	Agree	Agree	Agree	Agree	Yes	Yes	Yes	Yes	Yes	Yes	Yes
1571	Male	21-30	Bachelor	Single	Non-govt. empolyee	Join	≥5	>30,000	Rural area	Less accurate	More Positive	More frequent	Yes	Yes	No	No	No	No	Agree	Agree	Agree	Agree	Agree	Agree	Yes	Yes	Yes	Yes	Yes	Yes	Yes
1572	Male	>30	Highier education (avobe bachelor)	Single	Non-govt. empolyee	Join	≥5	>30,000	Rural area	Less accurate	More Positive	More frequent	Yes	Yes	No	No	Don't know	No	Agree	Agree	Agree	Agree	Agree	Agree	Yes	Yes	Yes	Yes	Yes	Yes	Yes
1573	Female	21-30	Bachelor	Single	Student	Join	≥5	>30,000	Urban area	Less accurate	More Positive	More frequent	Yes	No	No	No	No	No	Agree	Agree	Agree	Agree	Agree	Agree	Yes	Yes	Yes	Yes	Yes	Yes	Yes
1574	Female	>30	Highier education (avobe bachelor)	Single	Non-govt. empolyee	Join	≥5	>30,000	Rural area	Less accurate	More Positive	More frequent	Yes	Yes	No	No	No	No	Agree	Agree	Agree	Agree	Agree	Agree	Yes	Yes	Yes	Sometimes	Yes	Yes	Yes
1575	Female	12-20	Bachelor	Single	Student	Join	≥5	>30,000	Urban area	More accurate	More Positive	More frequent	Yes	No	No	No	Yes	No	Agree	Agree	Agree	Agree	Agree	Agree	Yes	Yes	No	Yes	Yes	Yes	Yes
1576	Male	>30	Highier education (avobe bachelor)	Married	Non-govt. empolyee	Join	<5	>30,000	Rural area	Less accurate	More Positive	More frequent	Yes	Yes	No	No	Yes	No	Agree	Agree	Agree	Undecided	Agree	Agree	Yes	Yes	Yes	Yes	No	Yes	Yes
1577	Male	>30	Highier education (avobe bachelor)	Married	Non-govt. empolyee	Join	≥5	>30,000	Rural area	Less accurate	More Positive	More frequent	Yes	Yes	No	No	Yes	No	Agree	Agree	Agree	Agree	Agree	Agree	Yes	Yes	Yes	Yes	Yes	Yes	Yes
1578	Male	21-30	Highier education (avobe bachelor)	Married	Non-govt. empolyee	Join	≥5	>30,000	Urban area	Less accurate	More Positive	More frequent	Yes	Yes	No	No	No	No	Agree	Agree	Agree	Agree	Agree	Agree	Yes	Yes	Yes	Yes	Yes	Yes	Yes
1579	Male	>30	Highier education (avobe bachelor)	Married	Non-govt. empolyee	Join	≥5	>30,000	Rural area	Less accurate	More Positive	More frequent	Yes	Yes	No	No	No	No	Agree	Agree	Agree	Agree	Agree	Agree	Yes	Yes	Yes	Yes	Yes	Yes	Yes
1580	Male	21-30	Bachelor	Married	Non-govt. empolyee	Join	≥5	>30,000	Rural area	Less accurate	More Positive	More frequent	Yes	Yes	No	No	Don't know	No	Agree	Agree	Agree	Agree	Agree	Agree	Yes	Yes	Yes	Yes	Yes	Yes	Yes
1581	Male	>30	Bachelor	Married	Businessman	Join	≥5	>30,000	Rural area	Less accurate	More Positive	More frequent	Yes	Yes	No	No	No	No	Agree	Agree	Agree	Agree	Agree	Agree	Yes	Yes	Yes	Yes	No	Yes	Yes
1582	Male	21-30	Bachelor	Married	Non-govt. empolyee	Join	<5	>30,000	Rural area	Less accurate	More Positive	More frequent	Yes	Yes	No	No	No	No	Agree	Agree	Agree	Agree	Agree	Agree	Yes	Yes	Yes	Yes	Yes	Yes	Yes
1583	Male	>30	Bachelor	Married	Non-govt. empolyee	Join	≥5	>30,000	Rural area	Less accurate	More Positive	More frequent	Yes	Yes	No	No	No	No	Agree	Agree	Agree	Agree	Agree	Agree	Yes	Yes	Yes	Yes	No	Yes	Yes
1584	Male	>30	Bachelor	Married	Non-govt. empolyee	Join	≥5	>30,000	Rural area	Less accurate	More Positive	More frequent	Yes	Yes	No	No	No	No	Agree	Agree	Agree	Agree	Agree	Agree	Yes	Yes	Yes	Yes	Yes	Yes	Yes
1585	Male	21-30	Bachelor	Married	Non-govt. empolyee	Join	≥5	>30,000	Rural area	Less accurate	More Positive	More frequent	Yes	Yes	No	No	No	No	Agree	Agree	Agree	Agree	Agree	Agree	Yes	Yes	Yes	Yes	Yes	Yes	Yes
1586	Female	21-30	Highier education (avobe bachelor)	Married	Govt. employee	Join	<5	>30,000	Urban area	Less accurate	More Positive	More frequent	Yes	Yes	No	No	Don't know	No	Agree	Agree	Agree	Agree	Agree	Agree	Yes	Yes	Yes	Yes	Yes	Yes	Yes
1587	Female	>30	Highier education (avobe bachelor)	Married	Non-govt. empolyee	Join	≥5	>30,000	Rural area	Less accurate	More Positive	More frequent	Yes	Yes	No	No	Yes	No	Agree	Agree	Agree	Agree	Agree	Agree	Yes	Yes	Yes	Yes	Yes	Yes	Yes
1588	Female	21-30	Highier education (avobe bachelor)	Married	Non-govt. empolyee	Join	<5	>30,000	Rural area	Less accurate	More Positive	More frequent	Yes	Yes	No	No	No	No	Agree	Agree	Agree	Agree	Agree	Agree	Yes	Yes	Yes	Yes	Yes	Yes	Yes
1589	Female	21-30	Highier education (avobe bachelor)	Married	Student	Join	≥5	>30,000	Rural area	Less accurate	More Positive	More frequent	Yes	Don't know	No	No	No	No	Agree	Agree	Agree	Agree	Undecided	Agree	Yes	Yes	Yes	Yes	No	Yes	Yes
1590	Female	>30	Highier education (avobe bachelor)	Married	Non-govt. empolyee	Join	<5	>30,000	Rural area	Less accurate	More Positive	More frequent	Yes	Yes	No	No	No	No	Agree	Agree	Agree	Agree	Agree	Agree	Yes	Yes	Yes	Yes	No	Yes	Yes
1591	Female	>30	Highier education (avobe bachelor)	Married	Non-govt. empolyee	Join	≥5	>30,000	Rural area	Less accurate	More Positive	More frequent	Yes	Yes	No	No	Yes	No	Agree	Agree	Agree	Agree	Agree	Agree	Yes	Yes	Sometimes	Yes	Yes	Yes	Yes
1592	Male	12-20	Bachelor	Single	Student	Nuclear	<5	<20,000	Urban area	Less accurate	Less Positive	Less frequent	Yes	Don't know	Don't know	Don't know	Don't know	No	Agree	Agree	Agree	Agree	Disagree	Agree	Yes	Yes	Sometimes	Yes	No	Yes	Yes
1593	Male	21-30	Highier education (avobe bachelor)	Single	Student	Nuclear	<5	<20,000	Urban area	Less accurate	Less Positive	Less frequent	Yes	Yes	Don't know	Don't know	Don't know	No	Disagree	Agree	Agree	Disagree	Agree	Agree	Yes	Yes	Sometimes	Sometimes	Yes	Sometimes	Yes
1594	Male	21-30	Bachelor	Single	Student	Nuclear	<5	<20,000	Urban area	Less accurate	Less Positive	Less frequent	Yes	Yes	Don't know	Don't know	Don't know	No	Agree	Agree	Agree	Disagree	Disagree	Agree	Sometimes	Yes	Yes	Yes	No	Sometimes	Yes
1595	Male	12-20	Intermediate (11-12)	Single	Student	Nuclear	<5	<20,000	Urban area	Less accurate	Less Positive	Less frequent	Yes	Yes	Don't know	Don't know	No	No	Agree	Agree	Agree	Agree	Disagree	Agree	Sometimes	Yes	Sometimes	Yes	No	Yes	Yes
1596	Male	21-30	Bachelor	Single	Student	Nuclear	<5	<20,000	Rural area	Less accurate	Less Positive	Less frequent	Yes	Yes	Don't know	Don't know	Don't know	No	Disagree	Disagree	Disagree	Undecided	Disagree	Agree	Yes	Yes	No	No	No	No	No
1597	Male	21-30	Bachelor	Single	Student	Nuclear	<5	<20,000	Rural area	Less accurate	Less Positive	Less frequent	Yes	Yes	Don't know	Don't know	Don't know	Don't know	Agree	Agree	Agree	Undecided	Undecided	Undecided	Yes	Yes	Yes	Sometimes	No	Sometimes	Sometimes
1598	Male	21-30	Bachelor	Single	Student	Nuclear	<5	<20,000	Rural area	Less accurate	Less Positive	Less frequent	Yes	Yes	Don't know	Don't know	Don't know	Don't know	Agree	Agree	Agree	Undecided	Undecided	Undecided	Yes	Yes	Yes	Sometimes	No	Sometimes	Sometimes
1599	Male	21-30	Bachelor	Single	Student	Nuclear	<5	<20,000	Urban area	Less accurate	Less Positive	Less frequent	Yes	Don't know	Don't know	Don't know	Yes	No	Agree	Agree	Agree	Undecided	Undecided	Agree	No	Yes	Sometimes	Yes	No	Yes	Yes
1600	Male	21-30	Bachelor	Single	Student	Nuclear	<5	<20,000	Rural area	Less accurate	Less Positive	Less frequent	Yes	Yes	Don't know	Don't know	Don't know	No	Agree	Agree	Agree	Agree	Disagree	Agree	Yes	Yes	No	Yes	No	Yes	Yes
1601	Male	12-20	Bachelor	Single	Student	Nuclear	<5	<20,000	Urban area	Less accurate	Less Positive	Less frequent	Yes	Yes	Don't know	Don't know	Yes	No	Agree	Agree	Agree	Agree	Disagree	Agree	Sometimes	Yes	Yes	Yes	No	Yes	Yes
1602	Male	21-30	Intermediate (11-12)	Single	Student	Nuclear	<5	<20,000	Rural area	Less accurate	Less Positive	Less frequent	Yes	Yes	Don't know	Don't know	Don't know	No	Agree	Agree	Agree	Agree	Disagree	Agree	Sometimes	Yes	Sometimes	Yes	Yes	Yes	Yes
1603	Male	21-30	Bachelor	Single	Student	Nuclear	<5	<20,000	Rural area	Less accurate	Less Positive	Less frequent	Don't know	Don't know	Don't know	Don't know	Don't know	Don't know	Undecided	Undecided	Undecided	Undecided	Undecided	Undecided	Sometimes	Yes	Yes	Yes	No	Yes	Yes
1604	Male	12-20	Bachelor	Single	Student	Nuclear	<5	<20,000	Rural area	Less accurate	Less Positive	Less frequent	Yes	No	Don't know	Don't know	No	No	Agree	Agree	Agree	Agree	Disagree	Agree	Sometimes	Yes	No	Yes	No	Yes	Yes
1605	Female	12-20	Bachelor	Single	Student	Nuclear	<5	<20,000	Rural area	Less accurate	Less Positive	Less frequent	Yes	Yes	Don't know	Don't know	Yes	No	Agree	Agree	Agree	Agree	Disagree	Agree	Yes	Yes	Sometimes	Yes	No	Yes	Yes
1606	Female	21-30	Bachelor	Single	Student	Nuclear	<5	<20,000	Rural area	Less accurate	Less Positive	Less frequent	Yes	Don't know	Don't know	Don't know	Don't know	No	Agree	Agree	Agree	Agree	Disagree	Agree	Sometimes	Yes	Yes	Yes	No	Yes	Yes
1607	Male	21-30	Bachelor	Married	Student	Nuclear	<5	<20,000	Rural area	Less accurate	Less Positive	Less frequent	Yes	Don't know	Don't know	Don't know	Yes	No	Agree	Agree	Agree	Agree	Disagree	Agree	Sometimes	Yes	Sometimes	Yes	No	Sometimes	Yes
1608	Male	12-20	Intermediate (11-12)	Single	Student	Join	<5	<20,000	Rural area	Less accurate	Less Positive	Less frequent	Yes	Don't know	Don't know	Don't know	No	Don't know	Agree	Agree	Agree	Agree	Disagree	Agree	Yes	Yes	Sometimes	Yes	No	Yes	Yes
1609	Male	12-20	Bachelor	Single	Student	Join	≥5	<20,000	Urban area	Less accurate	Less Positive	Less frequent	Yes	Yes	Don't know	Don't know	Don't know	No	Agree	Agree	Agree	Agree	Disagree	Agree	Sometimes	Yes	Yes	Sometimes	No	Sometimes	Sometimes
1610	Male	12-20	Intermediate (11-12)	Single	Student	Nuclear	<5	20,000-30,000	Urban area	Less accurate	Less Positive	Less frequent	Yes	No	Don't know	Don't know	No	No	Agree	Agree	Agree	Agree	Disagree	Agree	Yes	Yes	Sometimes	Yes	No	Yes	Yes
1611	Male	21-30	Bachelor	Single	Student	Nuclear	<5	20,000-30,000	Rural area	Less accurate	Less Positive	Less frequent	Yes	Yes	Don't know	Don't know	Don't know	No	Agree	Agree	Agree	Agree	Disagree	Agree	Yes	Yes	Yes	Yes	No	Sometimes	Yes
1612	Male	21-30	Bachelor	Single	Student	Nuclear	<5	20,000-30,000	Rural area	Less accurate	Less Positive	Less frequent	Yes	Yes	Don't know	Don't know	Yes	No	Agree	Agree	Agree	Agree	Disagree	Disagree	Sometimes	Yes	Yes	Yes	No	Yes	Yes
1613	Male	12-20	Bachelor	Single	Student	Nuclear	<5	20,000-30,000	Rural area	Less accurate	Less Positive	Less frequent	Yes	Don't know	Don't know	Don't know	No	No	Agree	Agree	Agree	Undecided	Undecided	Agree	Yes	Yes	Yes	Sometimes	No	Yes	Yes
1614	Male	21-30	Bachelor	Single	Student	Nuclear	≥5	20,000-30,000	Rural area	Less accurate	Less Positive	Less frequent	Yes	Yes	Don't know	Don't know	Don't know	Don't know	Agree	Agree	Agree	Agree	Undecided	Undecided	Yes	Yes	Sometimes	Yes	No	Yes	Yes
1615	Male	12-20	Bachelor	Single	Student	Nuclear	<5	20,000-30,000	Urban area	Less accurate	Less Positive	Less frequent	Yes	No	Don't know	Don't know	No	No	Agree	Agree	Agree	Agree	Disagree	Agree	Yes	Yes	No	Yes	Yes	Yes	Sometimes
1616	Male	12-20	Bachelor	Single	Student	Nuclear	<5	20,000-30,000	Rural area	Less accurate	Less Positive	Less frequent	Yes	Yes	Don't know	Don't know	Don't know	No	Agree	Agree	Agree	Agree	Disagree	Agree	Yes	Yes	No	Yes	No	No	No
1617	Male	21-30	Bachelor	Single	Student	Nuclear	<5	20,000-30,000	Rural area	Less accurate	Less Positive	Less frequent	Yes	Yes	Don't know	Don't know	Don't know	No	Agree	Agree	Agree	Agree	Disagree	Agree	Yes	Yes	Sometimes	Yes	No	Yes	Yes
1618	Female	12-20	Intermediate (11-12)	Single	Student	Nuclear	<5	20,000-30,000	Rural area	Less accurate	Less Positive	Less frequent	Yes	Yes	Don't know	Don't know	Don't know	Don't know	Agree	Agree	Agree	Agree	Disagree	Agree	Sometimes	Yes	Yes	Yes	No	Yes	Yes
1619	Female	12-20	Bachelor	Single	Student	Nuclear	<5	20,000-30,000	Urban area	Less accurate	Less Positive	Less frequent	Yes	No	Don't know	Don't know	No	No	Agree	Agree	Agree	Agree	Disagree	Agree	No	Yes	Sometimes	Yes	No	Yes	Yes
1620	Female	12-20	Intermediate (11-12)	Single	Student	Nuclear	<5	20,000-30,000	Rural area	Less accurate	Less Positive	Less frequent	Yes	Yes	Don't know	Don't know	No	No	Agree	Agree	Agree	Agree	Disagree	Agree	Sometimes	Yes	Sometimes	Yes	No	Yes	Yes
1621	Female	12-20	Bachelor	Single	Student	Nuclear	<5	20,000-30,000	Urban area	Less accurate	Less Positive	Less frequent	Yes	Yes	Don't know	Don't know	No	No	Agree	Agree	Agree	Agree	Disagree	Agree	Sometimes	Yes	Sometimes	Yes	Yes	Yes	Yes
1622	Female	12-20	Bachelor	Single	Student	Nuclear	≥5	20,000-30,000	Rural area	Less accurate	Less Positive	Less frequent	Yes	Don't know	Don't know	Don't know	Yes	No	Agree	Agree	Agree	Agree	Disagree	Agree	Yes	Yes	No	Yes	No	Yes	Yes
1623	Female	12-20	Bachelor	Single	Student	Nuclear	<5	20,000-30,000	Rural area	Less accurate	Less Positive	Less frequent	Yes	Yes	Don't know	Don't know	Don't know	No	Agree	Agree	Agree	Agree	Disagree	Agree	Sometimes	Yes	No	Yes	No	Sometimes	Yes
1624	Female	12-20	Bachelor	Single	Student	Nuclear	<5	20,000-30,000	Rural area	Less accurate	Less Positive	Less frequent	Yes	Don't know	Don't know	Don't know	No	No	Agree	Agree	Agree	Agree	Disagree	Agree	Yes	Yes	Sometimes	Yes	No	Yes	Yes
1625	Female	21-30	Bachelor	Single	Student	Nuclear	<5	20,000-30,000	Rural area	Less accurate	Less Positive	Less frequent	Yes	Don't know	Don't know	Don't know	No	No	Agree	Agree	Agree	Agree	Disagree	Agree	Yes	Yes	Sometimes	Yes	No	Yes	Yes
1626	Female	12-20	Bachelor	Single	Student	Nuclear	<5	20,000-30,000	Rural area	Less accurate	Less Positive	Less frequent	Yes	Don't know	Don't know	Don't know	Don't know	Don't know	Agree	Agree	Agree	Undecided	Undecided	Agree	Sometimes	Yes	Sometimes	Yes	Yes	Yes	Yes
1627	Female	12-20	Bachelor	Single	Student	Nuclear	<5	20,000-30,000	Rural area	Less accurate	Less Positive	Less frequent	Yes	Yes	Don't know	Don't know	Don't know	Yes	Agree	Agree	Agree	Agree	Disagree	Agree	No	Yes	No	Yes	Yes	Yes	Yes
1628	Female	12-20	Bachelor	Single	Student	Nuclear	<5	20,000-30,000	Rural area	Less accurate	Less Positive	Less frequent	Yes	Don't know	Don't know	Don't know	Don't know	No	Agree	Agree	Agree	Agree	Disagree	Agree	Yes	Yes	No	Yes	No	Yes	Yes
1629	Female	12-20	Intermediate (11-12)	Single	Student	Nuclear	<5	20,000-30,000	Rural area	Less accurate	Less Positive	Less frequent	Yes	Don't know	Don't know	Don't know	Yes	No	Agree	Agree	Agree	Agree	Disagree	Agree	Yes	Yes	Sometimes	Yes	No	Yes	Yes
1630	Male	12-20	Bachelor	Single	Student	Join	≥5	20,000-30,000	Urban area	Less accurate	Less Positive	Less frequent	Yes	Don't know	Don't know	Don't know	Don't know	No	Agree	Agree	Agree	Disagree	Undecided	Agree	Sometimes	Yes	Yes	Yes	No	Yes	Yes
1631	Female	12-20	Bachelor	Single	Student	Join	≥5	20,000-30,000	Urban area	Less accurate	Less Positive	Less frequent	Yes	Yes	Don't know	Don't know	Yes	No	Agree	Agree	Agree	Agree	Disagree	Agree	Yes	Yes	No	Yes	No	Yes	Yes
1632	Male	>30	Highier education (avobe bachelor)	Married	Non-govt. empolyee	Join	≥5	20,000-30,000	Rural area	Less accurate	Less Positive	Less frequent	Yes	Don't know	Don't know	Don't know	Don't know	No	Agree	Agree	Agree	Agree	Disagree	Agree	Yes	Yes	No	Yes	Yes	Sometimes	Sometimes
1633	Male	21-30	Bachelor	Single	Student	Nuclear	≥5	>30,000	Rural area	Less accurate	Less Positive	Less frequent	Don't know	Yes	Don't know	Don't know	No	No	Agree	Agree	Agree	Undecided	Undecided	Agree	Sometimes	Yes	Sometimes	No	Yes	Sometimes	Yes
1634	Male	21-30	Bachelor	Single	Unemployment	Nuclear	<5	>30,000	Rural area	Less accurate	Less Positive	Less frequent	Yes	Yes	Don't know	Don't know	Yes	No	Agree	Agree	Agree	Disagree	Disagree	Agree	No	Yes	Sometimes	Yes	Yes	Yes	Yes
1635	Male	12-20	Bachelor	Single	Student	Nuclear	<5	>30,000	Rural area	Less accurate	Less Positive	Less frequent	Yes	Don't know	Don't know	Don't know	Don't know	Don't know	Agree	Agree	Agree	Disagree	Disagree	Agree	Sometimes	Yes	Yes	Yes	No	Sometimes	Sometimes
1636	Male	21-30	Bachelor	Single	Student	Nuclear	≥5	>30,000	Urban area	Less accurate	Less Positive	Less frequent	Yes	Yes	Don't know	Don't know	Don't know	No	Agree	Agree	Agree	Undecided	Undecided	Agree	Yes	Yes	Sometimes	Yes	No	Yes	Yes
1637	Male	12-20	Bachelor	Single	Student	Nuclear	≥5	>30,000	Rural area	Less accurate	Less Positive	Less frequent	Yes	Don't know	Don't know	Don't know	Yes	No	Agree	Agree	Agree	Agree	Disagree	Agree	Yes	Yes	Sometimes	Yes	No	Yes	Yes
1638	Male	21-30	Bachelor	Single	Student	Nuclear	<5	>30,000	Urban area	Less accurate	Less Positive	Less frequent	Yes	Don't know	Don't know	Don't know	Don't know	Don't know	Agree	Agree	Agree	Agree	Disagree	Agree	Yes	Yes	Sometimes	Yes	Yes	Sometimes	Sometimes
1639	Male	12-20	Bachelor	Single	Student	Nuclear	<5	>30,000	Urban area	Less accurate	Less Positive	Less frequent	Yes	Don't know	Don't know	Don't know	Yes	Don't know	Agree	Agree	Agree	Undecided	Undecided	Agree	Sometimes	Yes	Sometimes	Sometimes	No	Yes	Sometimes
1640	Male	>30	Highier education (avobe bachelor)	Single	Non-govt. empolyee	Nuclear	<5	>30,000	Rural area	Less accurate	Less Positive	Less frequent	Yes	Yes	Don't know	Don't know	Don't know	No	Agree	Agree	Agree	Undecided	Disagree	Agree	No	Yes	Sometimes	Sometimes	Yes	Sometimes	Sometimes
1641	Female	21-30	Highier education (avobe bachelor)	Single	Student	Nuclear	<5	>30,000	Rural area	Less accurate	Less Positive	Less frequent	Yes	Yes	Don't know	Don't know	Don't know	No	Agree	Agree	Agree	Agree	Disagree	Agree	Yes	Yes	Sometimes	Yes	No	Yes	Yes
1642	Female	21-30	Bachelor	Single	Student	Nuclear	<5	>30,000	Urban area	Less accurate	Less Positive	Less frequent	Yes	Don't know	Don't know	Don't know	No	No	Agree	Agree	Agree	Agree	Disagree	Agree	Yes	Yes	Sometimes	Yes	No	Yes	Yes
1643	Female	21-30	Bachelor	Single	Student	Nuclear	<5	>30,000	Rural area	Less accurate	Less Positive	Less frequent	Yes	Don't know	Don't know	Don't know	No	No	Agree	Agree	Agree	Agree	Disagree	Agree	Yes	Yes	Sometimes	Yes	No	Yes	Yes
1644	Female	21-30	Bachelor	Single	Student	Nuclear	<5	>30,000	Rural area	Less accurate	Less Positive	Less frequent	Yes	Yes	Don't know	Don't know	No	No	Agree	Agree	Agree	Undecided	Undecided	Agree	Sometimes	Yes	Sometimes	Yes	No	Yes	Yes
1645	Female	12-20	Bachelor	Single	Student	Nuclear	<5	>30,000	Rural area	Less accurate	Less Positive	Less frequent	Yes	Yes	Don't know	Don't know	No	No	Agree	Agree	Agree	Agree	Disagree	Agree	Sometimes	Yes	Sometimes	Yes	Yes	Yes	Yes
1646	Female	12-20	Bachelor	Single	Student	Nuclear	<5	>30,000	Rural area	Less accurate	Less Positive	Less frequent	Yes	No	Don't know	Don't know	Don't know	No	Agree	Agree	Agree	Agree	Disagree	Agree	Sometimes	Yes	No	Yes	No	Yes	Yes
1647	Female	12-20	Intermediate (11-12)	Single	Student	Nuclear	<5	>30,000	Rural area	Less accurate	Less Positive	Less frequent	Yes	Yes	Don't know	Don't know	No	No	Agree	Agree	Agree	Agree	Disagree	Agree	Sometimes	Yes	No	Yes	Yes	Yes	Yes
1648	Female	21-30	Highier education (avobe bachelor)	Single	Govt. employee	Nuclear	<5	>30,000	Rural area	Less accurate	Less Positive	Less frequent	Yes	Don't know	Don't know	Don't know	No	No	Agree	Agree	Agree	Undecided	Undecided	Agree	Yes	Yes	Sometimes	Yes	No	Sometimes	Sometimes
1649	Male	>30	Highier education (avobe bachelor)	Married	Non-govt. empolyee	Nuclear	<5	>30,000	Urban area	Less accurate	Less Positive	Less frequent	Yes	Yes	Don't know	Don't know	Don't know	No	Agree	Agree	Agree	Agree	Disagree	Agree	Sometimes	Yes	Sometimes	Yes	Yes	Yes	Yes
1650	Male	>30	Highier education (avobe bachelor)	Married	Non-govt. empolyee	Nuclear	<5	>30,000	Rural area	Less accurate	Less Positive	Less frequent	Yes	Yes	Don't know	Don't know	No	No	Agree	Agree	Agree	Agree	Disagree	Agree	No	Yes	Sometimes	Yes	Yes	Yes	No
1651	Male	21-30	Bachelor	Single	Student	Join	≥5	>30,000	Urban area	Less accurate	Less Positive	Less frequent	Yes	Yes	Don't know	Don't know	Yes	No	Agree	Agree	Agree	Undecided	Undecided	Agree	Yes	Yes	Sometimes	Sometimes	Yes	Sometimes	Yes
1652	Male	21-30	Bachelor	Single	Student	Join	≥5	>30,000	Rural area	Less accurate	Less Positive	Less frequent	Yes	No	Don't know	Don't know	No	No	Agree	Agree	Agree	Disagree	Undecided	Agree	Yes	Yes	Sometimes	Yes	No	Sometimes	Yes
1653	Male	21-30	Highier education (avobe bachelor)	Single	Businessman	Join	≥5	>30,000	Urban area	Less accurate	Less Positive	Less frequent	Yes	Yes	Don't know	Don't know	No	No	Agree	Agree	Agree	Agree	Disagree	Agree	Yes	Yes	Sometimes	Yes	No	Sometimes	Sometimes
1654	Male	>30	Highier education (avobe bachelor)	Married	Non-govt. empolyee	Join	<5	>30,000	Rural area	Less accurate	Less Positive	Less frequent	Yes	Don't know	Don't know	Don't know	No	No	Agree	Agree	Agree	Agree	Disagree	Agree	Yes	Yes	Sometimes	Yes	No	Yes	Yes
1655	Female	>30	Highier education (avobe bachelor)	Married	Govt. employee	Join	≥5	>30,000	Rural area	Less accurate	Less Positive	Less frequent	Yes	Yes	Don't know	Don't know	Don't know	No	Agree	Agree	Agree	Undecided	Undecided	Agree	Yes	Yes	Sometimes	Sometimes	No	Yes	Yes
1656	Female	>30	Bachelor	Married	Housewife	Join	≥5	>30,000	Rural area	Less accurate	Less Positive	Less frequent	Yes	Don't know	Don't know	Don't know	Don't know	No	Agree	Agree	Agree	Undecided	Undecided	Agree	Sometimes	Yes	Sometimes	Yes	No	Sometimes	Sometimes
1657	Male	21-30	Intermediate (11-12)	Single	Student	Join	<5	<20,000	Urban area	Less accurate	Less Positive	Less frequent	Don't know	Yes	Don't know	Don't know	Don't know	No	Agree	Agree	Agree	Agree	Disagree	Agree	No	No	No	No	No	Yes	Sometimes
1658	Male	21-30	Bachelor	Single	Non-govt. empolyee	Nuclear	≥5	<20,000	Urban area	Less accurate	Less Positive	Less frequent	Don't know	Yes	Don't know	Don't know	Don't know	Yes	Agree	Agree	Agree	Agree	Undecided	Undecided	Sometimes	Sometimes	Sometimes	Sometimes	No	Sometimes	Sometimes
1659	Male	12-20	Intermediate (11-12)	Single	Student	Nuclear	<5	<20,000	Urban area	Less accurate	Less Positive	Less frequent	Don't know	Don't know	Don't know	Don't know	No	No	Agree	Agree	Agree	Undecided	Undecided	Agree	Sometimes	Sometimes	Sometimes	Yes	No	Yes	Yes
1660	Male	21-30	Bachelor	Single	Student	Nuclear	<5	<20,000	Urban area	Less accurate	Less Positive	Less frequent	Yes	Don't know	Don't know	Don't know	Don't know	Don't know	Agree	Agree	Agree	Agree	Disagree	Agree	No	Sometimes	No	No	Yes	Sometimes	Sometimes
1661	Male	12-20	Bachelor	Single	Student	Nuclear	<5	<20,000	Urban area	Less accurate	Less Positive	Less frequent	Don't know	Don't know	Don't know	Don't know	Don't know	Don't know	Undecided	Undecided	Undecided	Undecided	Undecided	Undecided	Sometimes	Sometimes	Yes	Yes	No	Yes	Yes
1662	Male	21-30	Bachelor	Single	Student	Nuclear	<5	<20,000	Urban area	Less accurate	Less Positive	Less frequent	Yes	Yes	Don't know	Don't know	Don't know	Don't know	Agree	Agree	Agree	Agree	Undecided	Undecided	Yes	Sometimes	Sometimes	Yes	Yes	Yes	Yes
1663	Female	21-30	Bachelor	Single	Student	Nuclear	<5	<20,000	Rural area	Less accurate	Less Positive	Less frequent	Yes	Yes	Don't know	Don't know	No	No	Agree	Agree	Agree	Agree	Disagree	Disagree	Sometimes	Sometimes	Sometimes	Yes	No	Sometimes	Yes
1664	Male	21-30	Bachelor	Single	Student	Join	<5	<20,000	Urban area	Less accurate	Less Positive	Less frequent	Yes	Don't know	Don't know	Don't know	Don't know	Don't know	Agree	Agree	Agree	Undecided	Agree	Undecided	Sometimes	Sometimes	Sometimes	Sometimes	No	Sometimes	Sometimes
1665	Male	21-30	Bachelor	Single	Student	Join	<5	<20,000	Rural area	Less accurate	Less Positive	Less frequent	Yes	Yes	Don't know	Don't know	Don't know	Don't know	Agree	Agree	Agree	Undecided	Undecided	Disagree	Sometimes	Sometimes	Yes	Yes	No	Sometimes	Yes
1666	Male	12-20	Secondary (6-10)	Single	Student	Nuclear	≥5	20,000-30,000	Rural area	Less accurate	Less Positive	Less frequent	Yes	Don't know	Don't know	Don't know	Don't know	No	Undecided	Agree	Agree	Undecided	Undecided	Undecided	Sometimes	Sometimes	No	No	Yes	No	No
1667	Male	12-20	Bachelor	Single	Student	Nuclear	<5	20,000-30,000	Urban area	Less accurate	Less Positive	Less frequent	Yes	Don't know	Don't know	Don't know	No	No	Agree	Agree	Agree	Disagree	Disagree	Disagree	Sometimes	Sometimes	Yes	Yes	No	Sometimes	Yes
1668	Male	12-20	Secondary (6-10)	Single	Student	Join	≥5	20,000-30,000	Urban area	Less accurate	Less Positive	Less frequent	Don't know	Don't know	Don't know	Don't know	Don't know	Don't know	Undecided	Undecided	Undecided	Undecided	Undecided	Undecided	Sometimes	Sometimes	Sometimes	Sometimes	Yes	Sometimes	Yes
1669	Female	21-30	Highier education (avobe bachelor)	Single	Non-govt. empolyee	Join	≥5	20,000-30,000	Urban area	Less accurate	Less Positive	Less frequent	Yes	Don't know	Don't know	Don't know	Don't know	Don't know	Agree	Agree	Agree	Agree	Disagree	Agree	Sometimes	Sometimes	Sometimes	Yes	No	Yes	Yes
1670	Male	21-30	Bachelor	Single	Student	Nuclear	<5	>30,000	Rural area	Less accurate	Less Positive	Less frequent	Don't know	Yes	Don't know	Don't know	Don't know	No	Agree	Undecided	Agree	Undecided	Undecided	Agree	Sometimes	Sometimes	Yes	Yes	No	Yes	Sometimes
1671	Female	12-20	Intermediate (11-12)	Single	Student	Nuclear	<5	>30,000	Rural area	Less accurate	Less Positive	Less frequent	Yes	Yes	Don't know	Don't know	No	No	Agree	Agree	Agree	Agree	Disagree	Agree	Yes	Sometimes	Yes	Yes	No	Yes	Yes
1672	Male	>30	Intermediate (11-12)	Married	Businessman	Nuclear	<5	>30,000	Rural area	Less accurate	Less Positive	Less frequent	Yes	Yes	Don't know	Don't know	Don't know	Don't know	Agree	Agree	Agree	Undecided	Undecided	Agree	Sometimes	Sometimes	Sometimes	Sometimes	No	Sometimes	Sometimes
1673	Female	12-20	Bachelor	Married	Student	Nuclear	<5	>30,000	Rural area	Less accurate	Less Positive	Less frequent	Yes	Don't know	Don't know	Don't know	Don't know	Don't know	Agree	Agree	Agree	Agree	Disagree	Agree	Sometimes	Sometimes	Sometimes	Yes	No	Sometimes	Sometimes
1674	Female	21-30	Highier education (avobe bachelor)	Married	Govt. employee	Nuclear	<5	>30,000	Rural area	Less accurate	Less Positive	Less frequent	Yes	Yes	Don't know	Don't know	Yes	No	Agree	Agree	Agree	Agree	Disagree	Agree	Yes	Sometimes	Sometimes	Sometimes	No	Sometimes	Sometimes
1675	Male	21-30	Highier education (avobe bachelor)	Single	Non-govt. empolyee	Nuclear	<5	<20,000	Urban area	Less accurate	Less Positive	More frequent	Yes	Yes	Don't know	Don't know	No	No	Agree	Agree	Agree	Agree	Disagree	Agree	Yes	Yes	Yes	Yes	Yes	Yes	Yes
1676	Male	21-30	Secondary (6-10)	Single	Student	Nuclear	<5	<20,000	Rural area	Less accurate	Less Positive	More frequent	Yes	Yes	Don't know	Don't know	Don't know	Don't know	Agree	Agree	Agree	Agree	Disagree	Agree	Yes	Yes	Yes	Yes	Yes	Yes	Yes
1677	Male	>30	Highier education (avobe bachelor)	Single	Non-govt. empolyee	Nuclear	<5	<20,000	Urban area	Less accurate	Less Positive	More frequent	Yes	Don't know	Don't know	Don't know	Don't know	No	Agree	Agree	Agree	Agree	Undecided	Undecided	Yes	Yes	Yes	Yes	Yes	Sometimes	Yes
1678	Male	12-20	Intermediate (11-12)	Single	Student	Nuclear	<5	<20,000	Rural area	Less accurate	Less Positive	More frequent	Yes	No	Don't know	Don't know	Don't know	No	Agree	Agree	Agree	Disagree	Agree	Agree	Yes	Yes	Yes	Yes	No	Yes	Yes
1679	Male	21-30	Bachelor	Single	Student	Nuclear	≥5	<20,000	Rural area	Less accurate	Less Positive	More frequent	Yes	Yes	Don't know	Don't know	No	No	Agree	Agree	Agree	Agree	Disagree	Agree	Yes	Yes	Yes	Yes	Yes	Yes	Yes
1680	Female	21-30	Bachelor	Single	Student	Nuclear	<5	<20,000	Urban area	Less accurate	Less Positive	More frequent	Yes	Don't know	Don't know	Don't know	Don't know	Don't know	Agree	Agree	Agree	Undecided	Undecided	Undecided	Yes	Yes	Yes	Yes	No	Yes	Yes
1681	Female	12-20	Intermediate (11-12)	Single	Student	Nuclear	≥5	<20,000	Urban area	Less accurate	Less Positive	More frequent	Yes	Yes	Don't know	Don't know	Don't know	No	Agree	Agree	Agree	Agree	Disagree	Agree	Yes	Yes	Yes	Yes	No	Yes	Yes
1682	Female	21-30	Bachelor	Single	Student	Nuclear	≥5	<20,000	Rural area	Less accurate	Less Positive	More frequent	Yes	Yes	Don't know	Don't know	Don't know	No	Agree	Agree	Agree	Undecided	Undecided	Agree	Yes	Yes	Yes	Yes	No	Yes	Yes
1683	Female	12-20	Bachelor	Single	Student	Nuclear	<5	<20,000	Urban area	Less accurate	Less Positive	More frequent	Yes	Don't know	Don't know	Don't know	Don't know	No	Agree	Agree	Agree	Disagree	Disagree	Agree	Yes	Yes	Yes	Yes	Yes	Yes	Yes
1684	Female	21-30	Intermediate (11-12)	Single	Student	Nuclear	<5	<20,000	Urban area	Less accurate	Less Positive	More frequent	Yes	Yes	Don't know	Don't know	Yes	No	Agree	Agree	Agree	Agree	Disagree	Agree	Yes	Yes	Yes	Yes	No	Yes	Yes
1685	Female	21-30	Bachelor	Single	Student	Nuclear	<5	<20,000	Urban area	Less accurate	Less Positive	More frequent	Yes	Yes	Don't know	Don't know	Don't know	No	Agree	Agree	Agree	Agree	Disagree	Agree	Yes	Yes	Yes	Yes	No	Yes	Yes
1686	Female	12-20	Bachelor	Single	Student	Nuclear	<5	<20,000	Urban area	Less accurate	Less Positive	More frequent	Yes	Don't know	Don't know	Don't know	Don't know	No	Agree	Agree	Agree	Undecided	Undecided	Agree	Yes	Yes	Yes	Yes	No	Yes	Yes
1687	Female	12-20	Intermediate (11-12)	Single	Student	Nuclear	<5	<20,000	Rural area	Less accurate	Less Positive	More frequent	Yes	Yes	Don't know	Don't know	Don't know	No	Agree	Agree	Agree	Agree	Disagree	Agree	Yes	Yes	Yes	Yes	No	Yes	Yes
1688	Male	21-30	Intermediate (11-12)	Married	Non-govt. empolyee	Nuclear	<5	<20,000	Rural area	Less accurate	Less Positive	More frequent	Yes	Don't know	Don't know	Don't know	No	No	Agree	Agree	Agree	Agree	Disagree	Agree	Yes	Yes	Yes	Yes	Yes	Yes	Yes
1689	Male	>30	Bachelor	Single	Govt. employee	Join	≥5	<20,000	Rural area	Less accurate	Less Positive	More frequent	Don't know	Don't know	Don't know	Don't know	Don't know	Don't know	Undecided	Undecided	Undecided	Undecided	Undecided	Undecided	Yes	Yes	Yes	Yes	Yes	Yes	Yes
1690	Male	21-30	Intermediate (11-12)	Married	Businessman	Join	<5	<20,000	Urban area	Less accurate	Less Positive	More frequent	Don't know	Don't know	Don't know	Don't know	Don't know	Don't know	Undecided	Undecided	Undecided	Undecided	Undecided	Undecided	Yes	Yes	Yes	Yes	Yes	Yes	Yes
1691	Male	12-20	Intermediate (11-12)	Single	Student	Nuclear	<5	20,000-30,000	Rural area	Less accurate	Less Positive	More frequent	Don't know	Don't know	Don't know	Don't know	Don't know	No	Agree	Agree	Agree	Agree	Disagree	Agree	Yes	Yes	Yes	Yes	No	Yes	Yes
1692	Male	12-20	Bachelor	Single	Student	Nuclear	<5	20,000-30,000	Rural area	Less accurate	Less Positive	More frequent	Yes	Yes	Don't know	Don't know	No	No	Agree	Agree	Agree	Agree	Disagree	Agree	Yes	Yes	Yes	Yes	No	Yes	Yes
1693	Male	21-30	Bachelor	Single	Student	Nuclear	<5	20,000-30,000	Urban area	Less accurate	Less Positive	More frequent	Yes	Don't know	Don't know	Don't know	No	No	Agree	Agree	Agree	Agree	Disagree	Agree	Yes	Yes	Yes	Yes	No	Yes	Yes
1694	Female	12-20	Bachelor	Single	Student	Nuclear	<5	20,000-30,000	Rural area	Less accurate	Less Positive	More frequent	Yes	Yes	Don't know	Don't know	No	No	Agree	Agree	Agree	Agree	Disagree	Agree	Yes	Yes	Yes	Yes	Yes	Yes	Yes
1695	Female	12-20	Bachelor	Single	Student	Nuclear	<5	20,000-30,000	Rural area	Less accurate	Less Positive	More frequent	Yes	No	Don't know	Don't know	No	No	Agree	Agree	Agree	Agree	Disagree	Agree	Yes	Yes	Yes	Yes	No	Yes	Yes
1696	Female	12-20	Bachelor	Single	Student	Nuclear	<5	20,000-30,000	Rural area	Less accurate	Less Positive	More frequent	Yes	Yes	Don't know	Don't know	No	No	Agree	Agree	Agree	Undecided	Disagree	Disagree	Yes	Yes	Yes	Yes	Yes	Yes	Yes
1697	Female	21-30	Bachelor	Single	Student	Nuclear	<5	20,000-30,000	Rural area	Less accurate	Less Positive	More frequent	Yes	Don't know	Don't know	Don't know	Don't know	Don't know	Agree	Agree	Agree	Agree	Disagree	Agree	Yes	Yes	Yes	Yes	No	Yes	Yes
1698	Female	12-20	Bachelor	Single	Student	Nuclear	<5	20,000-30,000	Urban area	Less accurate	Less Positive	More frequent	Yes	Don't know	Don't know	Don't know	Yes	Don't know	Agree	Agree	Agree	Undecided	Agree	Undecided	Yes	Yes	Yes	Yes	No	Yes	Yes
1699	Female	12-20	Bachelor	Single	Student	Nuclear	≥5	20,000-30,000	Rural area	Less accurate	Less Positive	More frequent	Yes	Yes	Don't know	Don't know	Don't know	No	Agree	Agree	Agree	Undecided	Disagree	Agree	Sometimes	Yes	Yes	Yes	Yes	Yes	Yes
1700	Male	>30	Bachelor	Married	Govt. employee	Nuclear	<5	20,000-30,000	Urban area	Less accurate	Less Positive	More frequent	Yes	Yes	Don't know	Don't know	Don't know	No	Agree	Agree	Agree	Undecided	Undecided	Agree	Yes	Yes	Yes	Yes	No	Yes	Yes
1701	Female	21-30	Bachelor	Married	Housewife	Nuclear	<5	20,000-30,000	Rural area	Less accurate	Less Positive	More frequent	Yes	Yes	Don't know	Don't know	No	No	Agree	Agree	Agree	Agree	Disagree	Agree	Yes	Yes	Yes	Yes	Yes	Yes	Yes
1702	Male	21-30	Intermediate (11-12)	Single	Student	Join	≥5	20,000-30,000	Rural area	Less accurate	Less Positive	More frequent	Yes	Don't know	Don't know	Don't know	Don't know	No	Agree	Agree	Agree	Agree	Disagree	Agree	Yes	Yes	Yes	Yes	Yes	Yes	Yes
1703	Male	21-30	Bachelor	Single	Student	Join	≥5	20,000-30,000	Rural area	Less accurate	Less Positive	More frequent	Yes	Yes	Don't know	Don't know	No	No	Agree	Agree	Agree	Agree	Disagree	Agree	Yes	Yes	Yes	Yes	No	Yes	Yes
1704	Male	21-30	Highier education (avobe bachelor)	Single	Non-govt. empolyee	Join	≥5	20,000-30,000	Urban area	Less accurate	Less Positive	More frequent	Yes	Don't know	Don't know	Don't know	Don't know	No	Agree	Agree	Agree	Agree	Disagree	Agree	Yes	Yes	Yes	Yes	Yes	Yes	Yes
1705	Male	12-20	Intermediate (11-12)	Single	Student	Join	≥5	20,000-30,000	Urban area	Less accurate	Less Positive	More frequent	Yes	Don't know	Don't know	Don't know	No	No	Agree	Agree	Agree	Agree	Disagree	Agree	Yes	Yes	Yes	Yes	No	Yes	Yes
1706	Male	>30	Highier education (avobe bachelor)	Married	Non-govt. empolyee	Join	<5	20,000-30,000	Rural area	Less accurate	Less Positive	More frequent	Yes	Yes	Don't know	Don't know	Don't know	No	Agree	Agree	Agree	Agree	Disagree	Agree	Yes	Yes	Yes	Yes	No	Yes	Yes
1707	Male	21-30	Bachelor	Married	Non-govt. empolyee	Join	≥5	20,000-30,000	Rural area	Less accurate	Less Positive	More frequent	Don't know	Don't know	Don't know	Don't know	No	Don't know	Agree	Disagree	Agree	Agree	Agree	Disagree	Yes	Yes	Yes	Yes	No	Yes	Yes
1708	Male	21-30	Bachelor	Single	Student	Nuclear	<5	>30,000	Rural area	Less accurate	Less Positive	More frequent	Yes	Yes	Don't know	Don't know	No	No	Agree	Agree	Agree	Agree	Disagree	Agree	Yes	Yes	Yes	Sometimes	Yes	Yes	Yes
1709	Male	21-30	Bachelor	Single	Student	Nuclear	<5	>30,000	Urban area	Less accurate	Less Positive	More frequent	Yes	Don't know	Don't know	Don't know	Don't know	Don't know	Agree	Agree	Agree	Agree	Disagree	Agree	Yes	Yes	Yes	Yes	No	Yes	Yes
1710	Male	21-30	Intermediate (11-12)	Single	Student	Nuclear	<5	>30,000	Rural area	Less accurate	Less Positive	More frequent	Yes	Don't know	Don't know	Don't know	Don't know	No	Agree	Agree	Agree	Agree	Disagree	Agree	Yes	Yes	Yes	Yes	No	Yes	Yes
1711	Male	12-20	Bachelor	Single	Student	Nuclear	<5	>30,000	Urban area	Less accurate	Less Positive	More frequent	Yes	Yes	Don't know	Don't know	No	No	Agree	Agree	Agree	Agree	Disagree	Agree	Yes	Yes	Yes	Yes	No	Yes	Yes
1712	Female	21-30	Intermediate (11-12)	Single	Student	Nuclear	<5	>30,000	Rural area	Less accurate	Less Positive	More frequent	Yes	No	Don't know	Don't know	Don't know	No	Agree	Agree	Agree	Agree	Disagree	Agree	Yes	Yes	Yes	Yes	Yes	Sometimes	Yes
1713	Female	21-30	Bachelor	Single	Student	Nuclear	<5	>30,000	Rural area	Less accurate	Less Positive	More frequent	Yes	Don't know	Don't know	Don't know	Don't know	No	Agree	Agree	Agree	Agree	Undecided	Undecided	Yes	Yes	Sometimes	Yes	Yes	Yes	Yes
1714	Female	12-20	Bachelor	Single	Student	Nuclear	<5	>30,000	Rural area	Less accurate	Less Positive	More frequent	Yes	Yes	Don't know	Don't know	No	No	Agree	Agree	Agree	Agree	Disagree	Agree	Yes	Yes	Yes	Yes	No	Yes	Yes
1715	Female	12-20	Intermediate (11-12)	Single	Student	Nuclear	<5	>30,000	Rural area	Less accurate	Less Positive	More frequent	Yes	Yes	Don't know	Don't know	No	No	Agree	Agree	Agree	Agree	Disagree	Agree	Yes	Yes	Yes	Yes	No	Yes	Yes
1716	Female	21-30	Bachelor	Single	Non-govt. empolyee	Nuclear	<5	>30,000	Rural area	Less accurate	Less Positive	More frequent	Yes	Yes	Don't know	Don't know	Yes	No	Agree	Agree	Agree	Agree	Disagree	Agree	Yes	Yes	Yes	Yes	Yes	Yes	Yes
1717	Female	12-20	Bachelor	Single	Student	Nuclear	<5	>30,000	Rural area	Less accurate	Less Positive	More frequent	Yes	Yes	Don't know	Don't know	Don't know	No	Agree	Agree	Agree	Disagree	Agree	Agree	Yes	Yes	Yes	Yes	No	Yes	Yes
1718	Female	21-30	Bachelor	Single	Student	Nuclear	<5	>30,000	Rural area	Less accurate	Less Positive	More frequent	Yes	Yes	Don't know	Don't know	No	No	Agree	Agree	Agree	Agree	Disagree	Agree	Yes	Yes	Yes	Yes	Yes	Yes	Yes
1719	Female	12-20	Bachelor	Single	Student	Nuclear	<5	>30,000	Rural area	Less accurate	Less Positive	More frequent	Yes	Yes	Don't know	Don't know	No	No	Agree	Agree	Agree	Agree	Disagree	Agree	Yes	Yes	Yes	Yes	No	Yes	Yes
1720	Female	21-30	Bachelor	Single	Student	Nuclear	<5	>30,000	Rural area	Less accurate	Less Positive	More frequent	Yes	No	Don't know	Don't know	Don't know	No	Agree	Agree	Agree	Agree	Disagree	Agree	Yes	Yes	Yes	Yes	No	Yes	Yes
1721	Female	21-30	Highier education (avobe bachelor)	Single	Govt. employee	Nuclear	<5	>30,000	Urban area	Less accurate	Less Positive	More frequent	Yes	Yes	Don't know	Don't know	No	No	Agree	Agree	Agree	Agree	Disagree	Agree	Yes	Yes	Sometimes	Yes	Yes	Yes	Yes
1722	Female	21-30	Highier education (avobe bachelor)	Single	Non-govt. empolyee	Nuclear	<5	>30,000	Rural area	Less accurate	Less Positive	More frequent	Yes	Yes	Don't know	Don't know	No	No	Agree	Agree	Agree	Agree	Disagree	Agree	Yes	Yes	Sometimes	Yes	Yes	Yes	Yes
1723	Male	21-30	Highier education (avobe bachelor)	Married	Govt. employee	Nuclear	<5	>30,000	Urban area	Less accurate	Less Positive	More frequent	Yes	Yes	Don't know	Don't know	Yes	No	Agree	Agree	Agree	Agree	Disagree	Agree	Yes	Yes	Yes	Yes	Yes	Yes	Yes
1724	Male	>30	Highier education (avobe bachelor)	Married	Non-govt. empolyee	Nuclear	<5	>30,000	Rural area	Less accurate	Less Positive	More frequent	Yes	Yes	Don't know	Don't know	Don't know	No	Agree	Agree	Agree	Agree	Disagree	Agree	Yes	Yes	Yes	Yes	No	Yes	Yes
1725	Female	>30	Highier education (avobe bachelor)	Married	Non-govt. empolyee	Nuclear	<5	>30,000	Rural area	Less accurate	Less Positive	More frequent	Yes	Don't know	Don't know	Don't know	Don't know	No	Agree	Agree	Agree	Agree	Disagree	Agree	Yes	Yes	Yes	Yes	No	Yes	Yes
1726	Female	21-30	Bachelor	Married	Housewife	Nuclear	<5	>30,000	Urban area	Less accurate	Less Positive	More frequent	Yes	Yes	Don't know	Don't know	Don't know	No	Agree	Agree	Agree	Agree	Disagree	Agree	Yes	Yes	Yes	Yes	No	Yes	Yes
1727	Male	21-30	Bachelor	Single	Student	Join	≥5	>30,000	Urban area	Less accurate	Less Positive	More frequent	Yes	No	Don't know	Don't know	Don't know	No	Agree	Agree	Agree	Disagree	Agree	Agree	Yes	Yes	Yes	Yes	No	Yes	Yes
1728	Male	21-30	Bachelor	Single	Student	Join	≥5	>30,000	Rural area	Less accurate	Less Positive	More frequent	Yes	Yes	Don't know	Don't know	No	Yes	Agree	Agree	Agree	Agree	Disagree	Agree	Yes	Yes	Yes	Yes	No	Yes	Yes
1729	Male	21-30	Bachelor	Single	Student	Join	≥5	>30,000	Rural area	Less accurate	Less Positive	More frequent	Yes	No	Don't know	Don't know	No	No	Agree	Agree	Agree	Agree	Disagree	Agree	Yes	Yes	Yes	Yes	No	Yes	Yes
1730	Female	12-20	Bachelor	Single	Student	Join	≥5	>30,000	Rural area	Less accurate	Less Positive	More frequent	Yes	Don't know	Don't know	Don't know	Don't know	Don't know	Agree	Agree	Agree	Undecided	Undecided	Agree	Yes	Yes	Yes	Yes	No	Yes	Yes
1731	Female	12-20	Bachelor	Single	Student	Join	≥5	>30,000	Rural area	Less accurate	Less Positive	More frequent	Yes	Don't know	Don't know	Don't know	Yes	No	Agree	Agree	Agree	Agree	Disagree	Agree	Yes	Yes	Yes	Yes	No	Yes	Yes
1732	Male	>30	Highier education (avobe bachelor)	Married	Businessman	Join	≥5	>30,000	Rural area	Less accurate	Less Positive	More frequent	Yes	Yes	Don't know	Don't know	No	No	Agree	Agree	Agree	Agree	Disagree	Agree	Yes	Yes	Yes	Yes	No	Yes	Yes
1733	Male	21-30	Highier education (avobe bachelor)	Married	Businessman	Join	≥5	>30,000	Rural area	Less accurate	Less Positive	More frequent	Yes	Yes	Don't know	Don't know	Don't know	No	Agree	Agree	Agree	Agree	Disagree	Agree	Yes	Yes	Yes	Yes	No	Yes	Yes
1734	Female	>30	Highier education (avobe bachelor)	Married	Housewife	Join	≥5	>30,000	Rural area	Less accurate	Less Positive	More frequent	Yes	Yes	Don't know	Don't know	Don't know	No	Agree	Agree	Agree	Agree	Disagree	Agree	Yes	Yes	Yes	Yes	Yes	Yes	Yes
1735	Female	21-30	Highier education (avobe bachelor)	Married	Non-govt. empolyee	Join	<5	>30,000	Rural area	Less accurate	Less Positive	More frequent	Yes	Yes	Don't know	Don't know	No	No	Agree	Agree	Agree	Agree	Disagree	Agree	Yes	Yes	Yes	Yes	No	Yes	Yes
1736	Male	21-30	Bachelor	Single	Student	Nuclear	<5	<20,000	Rural area	Less accurate	More Positive	Less frequent	Yes	Yes	Don't know	Don't know	No	No	Agree	Agree	Agree	Agree	Undecided	Agree	Sometimes	Yes	Sometimes	Yes	No	Yes	Yes
1737	Male	12-20	Secondary (6-10)	Single	Student	Nuclear	<5	<20,000	Rural area	Less accurate	More Positive	Less frequent	Yes	Don't know	Don't know	Don't know	Don't know	No	Agree	Agree	Agree	Agree	Undecided	Agree	Yes	Yes	Yes	Yes	No	Sometimes	Yes
1738	Male	21-30	Highier education (avobe bachelor)	Single	Non-govt. empolyee	Nuclear	≥5	<20,000	Urban area	Less accurate	More Positive	Less frequent	Yes	Don't know	Don't know	Don't know	Don't know	No	Agree	Agree	Agree	Agree	Undecided	Agree	Sometimes	Yes	No	Sometimes	No	Sometimes	Yes
1739	Male	21-30	Highier education (avobe bachelor)	Single	Student	Nuclear	<5	<20,000	Urban area	Less accurate	More Positive	Less frequent	Yes	No	Don't know	Don't know	No	No	Agree	Agree	Agree	Agree	Undecided	Agree	Yes	Yes	Sometimes	Yes	No	Yes	Yes
1740	Male	12-20	Bachelor	Single	Student	Nuclear	≥5	<20,000	Urban area	Less accurate	More Positive	Less frequent	Yes	Yes	Don't know	Don't know	Don't know	No	Agree	Agree	Agree	Agree	Undecided	Agree	Sometimes	Yes	Sometimes	Sometimes	No	Yes	Yes
1741	Male	12-20	Bachelor	Single	Student	Nuclear	<5	<20,000	Urban area	Less accurate	More Positive	Less frequent	Yes	Yes	Don't know	Don't know	No	No	Agree	Agree	Agree	Agree	Agree	Agree	Sometimes	Yes	Sometimes	Yes	No	Sometimes	Sometimes
1742	Male	12-20	Bachelor	Single	Student	Nuclear	<5	<20,000	Urban area	Less accurate	More Positive	Less frequent	Yes	Yes	Don't know	Don't know	No	No	Agree	Agree	Agree	Agree	Agree	Agree	Sometimes	Yes	No	No	No	Sometimes	Sometimes
1743	Male	12-20	Bachelor	Single	Student	Nuclear	≥5	<20,000	Urban area	Less accurate	More Positive	Less frequent	Yes	No	Don't know	Don't know	No	No	Agree	Agree	Agree	Agree	Agree	Agree	No	Yes	Sometimes	Yes	No	Yes	Yes
1744	Male	21-30	Bachelor	Single	Student	Nuclear	<5	<20,000	Urban area	Less accurate	More Positive	Less frequent	Yes	Don't know	Don't know	Don't know	Don't know	No	Agree	Agree	Agree	Agree	Agree	Agree	Sometimes	Yes	Yes	Yes	No	Yes	Yes
1745	Male	21-30	Bachelor	Single	Student	Nuclear	≥5	<20,000	Urban area	Less accurate	More Positive	Less frequent	Yes	Yes	Don't know	Don't know	No	No	Agree	Agree	Agree	Agree	Agree	Agree	Sometimes	Yes	Sometimes	Yes	No	Sometimes	Sometimes
1746	Male	21-30	Highier education (avobe bachelor)	Single	Student	Nuclear	≥5	<20,000	Urban area	Less accurate	More Positive	Less frequent	Yes	Yes	Don't know	Don't know	Don't know	Don't know	Agree	Agree	Agree	Agree	Agree	Agree	Sometimes	Yes	Sometimes	Sometimes	Yes	Sometimes	Yes
1747	Male	21-30	Highier education (avobe bachelor)	Single	Unemployment	Nuclear	<5	<20,000	Rural area	Less accurate	More Positive	Less frequent	Yes	No	Don't know	Don't know	No	No	Agree	Agree	Agree	Agree	Agree	Agree	Sometimes	Yes	Sometimes	Yes	No	Yes	Yes
1748	Male	21-30	Highier education (avobe bachelor)	Single	Non-govt. empolyee	Nuclear	<5	<20,000	Urban area	Less accurate	More Positive	Less frequent	Yes	Don't know	Don't know	Don't know	No	No	Agree	Agree	Agree	Agree	Agree	Agree	Yes	Yes	Sometimes	Yes	Yes	Yes	Sometimes
1749	Female	12-20	Intermediate (11-12)	Single	Student	Nuclear	<5	<20,000	Urban area	Less accurate	More Positive	Less frequent	Yes	Yes	Don't know	Don't know	Yes	No	Agree	Agree	Agree	Agree	Agree	Agree	Yes	Yes	Sometimes	Yes	No	Sometimes	Yes
1750	Female	12-20	Bachelor	Single	Student	Nuclear	≥5	<20,000	Rural area	Less accurate	More Positive	Less frequent	Yes	Yes	Don't know	Don't know	Yes	No	Agree	Agree	Agree	Agree	Undecided	Agree	Yes	Yes	Yes	Sometimes	No	Sometimes	Yes
1751	Female	21-30	Bachelor	Single	Student	Nuclear	<5	<20,000	Urban area	Less accurate	More Positive	Less frequent	Yes	Yes	Don't know	Don't know	Don't know	Don't know	Agree	Agree	Agree	Agree	Agree	Agree	Yes	Yes	Yes	No	No	Sometimes	Yes
1752	Female	12-20	Bachelor	Single	Student	Nuclear	≥5	<20,000	Rural area	Less accurate	More Positive	Less frequent	Yes	Don't know	Don't know	Don't know	No	No	Agree	Agree	Agree	Agree	Agree	Agree	Yes	Yes	Sometimes	Yes	No	Sometimes	Sometimes
1753	Female	21-30	Bachelor	Single	Student	Nuclear	<5	<20,000	Urban area	Less accurate	More Positive	Less frequent	Yes	Yes	Don't know	Don't know	Yes	No	Agree	Agree	Agree	Agree	Agree	Agree	Sometimes	Yes	Yes	Yes	No	Yes	Yes
1754	Female	21-30	Highier education (avobe bachelor)	Single	Student	Nuclear	<5	<20,000	Rural area	Less accurate	More Positive	Less frequent	Yes	Don't know	Don't know	Don't know	Don't know	No	Agree	Agree	Agree	Agree	Agree	Agree	Yes	Yes	No	Yes	No	Sometimes	Yes
1755	Female	12-20	Bachelor	Single	Student	Nuclear	<5	<20,000	Rural area	Less accurate	More Positive	Less frequent	No	Don't know	Don't know	Don't know	Don't know	No	Agree	Agree	Agree	Agree	Agree	Agree	No	Yes	Sometimes	Yes	No	Yes	Yes
1756	Female	12-20	Bachelor	Single	Student	Nuclear	<5	<20,000	Rural area	Less accurate	More Positive	Less frequent	Yes	Don't know	Don't know	Don't know	No	No	Agree	Agree	Agree	Agree	Undecided	Agree	Sometimes	Yes	Yes	Yes	No	Yes	Yes
1757	Female	21-30	Bachelor	Married	Student	Nuclear	<5	<20,000	Urban area	Less accurate	More Positive	Less frequent	Yes	Yes	Don't know	Don't know	Don't know	No	Agree	Agree	Agree	Agree	Agree	Agree	Yes	Yes	Sometimes	Sometimes	No	Sometimes	Yes
1758	Female	21-30	Bachelor	Married	Housewife	Nuclear	<5	<20,000	Urban area	Less accurate	More Positive	Less frequent	Yes	Yes	Don't know	Don't know	Don't know	No	Agree	Agree	Agree	Agree	Agree	Agree	Sometimes	Yes	Sometimes	Sometimes	No	Yes	Yes
1759	Male	12-20	Bachelor	Single	Student	Join	≥5	<20,000	Urban area	Less accurate	More Positive	Less frequent	Yes	Don't know	Don't know	Don't know	Don't know	No	Agree	Agree	Agree	Agree	Agree	Agree	Sometimes	Yes	Sometimes	Yes	No	Yes	Yes
1760	Male	21-30	Bachelor	Single	Student	Join	≥5	<20,000	Urban area	Less accurate	More Positive	Less frequent	Yes	Yes	Don't know	Don't know	Don't know	No	Agree	Agree	Agree	Agree	Agree	Agree	Sometimes	Yes	Sometimes	Sometimes	Yes	Sometimes	Sometimes
1761	Female	21-30	Bachelor	Single	Student	Join	≥5	<20,000	Urban area	Less accurate	More Positive	Less frequent	Yes	Yes	Don't know	Don't know	Don't know	No	Agree	Agree	Agree	Agree	Agree	Agree	Sometimes	Yes	Yes	Yes	No	Yes	Yes
1762	Male	>30	Bachelor	Married	Non-govt. empolyee	Join	<5	<20,000	Rural area	Less accurate	More Positive	Less frequent	Yes	Yes	Don't know	Don't know	Don't know	Don't know	Agree	Agree	Agree	Agree	Undecided	Agree	Yes	Yes	Sometimes	Yes	No	Yes	Yes
1763	Male	21-30	Bachelor	Married	Student	Join	≥5	<20,000	Rural area	Less accurate	More Positive	Less frequent	Yes	Don't know	Don't know	Don't know	Yes	No	Agree	Agree	Agree	Undecided	Agree	Agree	Sometimes	Yes	Sometimes	Sometimes	Yes	Yes	Yes
1764	Female	>30	Bachelor	Married	Housewife	Join	<5	<20,000	Rural area	Less accurate	More Positive	Less frequent	Yes	Yes	Don't know	Don't know	Don't know	Don't know	Agree	Agree	Agree	Undecided	Agree	Agree	Yes	Yes	Sometimes	Yes	No	Yes	Yes
1765	Male	21-30	Highier education (avobe bachelor)	Single	Student	Nuclear	<5	20,000-30,000	Rural area	Less accurate	More Positive	Less frequent	Yes	Don't know	Don't know	Don't know	No	No	Agree	Agree	Agree	Agree	Agree	Agree	Yes	Yes	No	Yes	No	Yes	Yes
1766	Male	21-30	Highier education (avobe bachelor)	Single	Student	Nuclear	<5	20,000-30,000	Rural area	Less accurate	More Positive	Less frequent	Yes	Don't know	Don't know	Don't know	No	No	Agree	Agree	Agree	Agree	Agree	Agree	Yes	Yes	No	Yes	No	Yes	Yes
1767	Male	21-30	Bachelor	Single	Student	Nuclear	<5	20,000-30,000	Rural area	Less accurate	More Positive	Less frequent	Yes	Yes	Don't know	Don't know	Don't know	Don't know	Agree	Agree	Agree	Agree	Agree	Agree	Yes	Yes	Sometimes	Yes	No	Yes	Yes
1768	Male	12-20	Intermediate (11-12)	Single	Student	Nuclear	<5	20,000-30,000	Urban area	More accurate	More Positive	Less frequent	Yes	No	Don't know	Don't know	Yes	No	Agree	Agree	Agree	Agree	Agree	Agree	Yes	Yes	Sometimes	Yes	No	Sometimes	Yes
1769	Male	21-30	Intermediate (11-12)	Single	Student	Nuclear	<5	20,000-30,000	Urban area	Less accurate	More Positive	Less frequent	Yes	Yes	Don't know	Don't know	No	No	Agree	Agree	Agree	Agree	Undecided	Agree	Yes	Yes	Yes	Sometimes	No	Sometimes	Sometimes
1770	Male	21-30	Bachelor	Single	Student	Nuclear	<5	20,000-30,000	Urban area	Less accurate	More Positive	Less frequent	Yes	Don't know	Don't know	Don't know	Don't know	No	Agree	Agree	Agree	Agree	Undecided	Agree	Sometimes	Yes	Sometimes	Yes	Yes	Yes	Yes
1771	Male	12-20	Bachelor	Single	Student	Nuclear	<5	20,000-30,000	Urban area	Less accurate	More Positive	Less frequent	Yes	Don't know	Don't know	Don't know	Yes	No	Agree	Agree	Agree	Agree	Agree	Agree	Yes	Yes	Sometimes	Yes	No	Yes	Yes
1772	Male	21-30	Bachelor	Single	Student	Nuclear	<5	20,000-30,000	Urban area	Less accurate	More Positive	Less frequent	Yes	Don't know	Don't know	Don't know	Don't know	No	Agree	Agree	Agree	Agree	Agree	Agree	Sometimes	Yes	Yes	Yes	No	Sometimes	Yes
1773	Male	12-20	Bachelor	Single	Student	Nuclear	<5	20,000-30,000	Rural area	Less accurate	More Positive	Less frequent	Yes	Yes	Don't know	Don't know	Don't know	No	Agree	Agree	Agree	Agree	Agree	Agree	Sometimes	Yes	Sometimes	Yes	No	Sometimes	Sometimes
1774	Male	12-20	Bachelor	Single	Student	Nuclear	<5	20,000-30,000	Rural area	Less accurate	More Positive	Less frequent	Yes	No	Don't know	Don't know	Don't know	Don't know	Agree	Agree	Agree	Agree	Undecided	Agree	No	Yes	Sometimes	Yes	No	Sometimes	Yes
1775	Male	21-30	Bachelor	Single	Student	Nuclear	<5	20,000-30,000	Urban area	Less accurate	More Positive	Less frequent	Yes	No	Don't know	Don't know	Don't know	No	Agree	Agree	Agree	Agree	Agree	Agree	Yes	Yes	No	Yes	No	Yes	Yes
1776	Female	21-30	Highier education (avobe bachelor)	Single	Govt. employee	Nuclear	<5	20,000-30,000	Rural area	Less accurate	More Positive	Less frequent	Yes	Don't know	Don't know	Don't know	No	No	Agree	Agree	Agree	Agree	Agree	Agree	Sometimes	Yes	Sometimes	Yes	No	Yes	Yes
1777	Female	21-30	Bachelor	Single	Student	Nuclear	<5	20,000-30,000	Urban area	Less accurate	More Positive	Less frequent	Yes	Don't know	Don't know	Don't know	Don't know	No	Agree	Agree	Agree	Agree	Agree	Agree	Yes	Yes	Yes	Yes	No	Sometimes	Yes
1778	Female	12-20	Bachelor	Single	Student	Nuclear	≥5	20,000-30,000	Rural area	Less accurate	More Positive	Less frequent	Yes	Yes	Don't know	Don't know	Don't know	Don't know	Agree	Agree	Agree	Agree	Agree	Agree	Yes	Yes	Sometimes	Yes	No	Yes	Yes
1779	Male	21-30	Bachelor	Married	Non-govt. empolyee	Nuclear	<5	20,000-30,000	Urban area	Less accurate	More Positive	Less frequent	Yes	Don't know	Don't know	Don't know	No	No	Agree	Agree	Agree	Agree	Agree	Agree	Sometimes	Yes	Sometimes	Yes	Yes	Yes	Yes
1780	Male	21-30	Bachelor	Single	Student	Join	≥5	20,000-30,000	Rural area	Less accurate	More Positive	Less frequent	No	Don't know	Don't know	Don't know	Don't know	Yes	Agree	Agree	Agree	Agree	Agree	Agree	Yes	Yes	Sometimes	Yes	No	Yes	Yes
1781	Male	21-30	Bachelor	Single	Student	Join	≥5	20,000-30,000	Urban area	More accurate	More Positive	Less frequent	Yes	No	Don't know	Don't know	Yes	No	Agree	Agree	Agree	Agree	Agree	Agree	Sometimes	Yes	Yes	Yes	No	Yes	Yes
1782	Female	12-20	Intermediate (11-12)	Single	Student	Join	≥5	20,000-30,000	Urban area	More accurate	More Positive	Less frequent	Yes	No	Don't know	Don't know	Yes	No	Agree	Agree	Agree	Agree	Agree	Agree	Sometimes	Yes	Sometimes	Yes	No	Sometimes	Yes
1783	Male	21-30	Highier education (avobe bachelor)	Married	Non-govt. empolyee	Join	≥5	20,000-30,000	Rural area	Less accurate	More Positive	Less frequent	Yes	Don't know	Don't know	Don't know	No	No	Agree	Agree	Agree	Agree	Agree	Agree	Sometimes	Yes	No	Yes	No	Sometimes	Yes
1784	Male	12-20	Bachelor	Single	Student	Nuclear	<5	>30,000	Urban area	Less accurate	More Positive	Less frequent	Yes	No	Don't know	Don't know	Don't know	No	Agree	Agree	Agree	Agree	Agree	Undecided	No	Yes	No	No	No	Sometimes	Sometimes
1785	Male	12-20	Bachelor	Single	Student	Nuclear	≥5	>30,000	Urban area	Less accurate	More Positive	Less frequent	Yes	Yes	Don't know	Don't know	Yes	No	Agree	Agree	Agree	Agree	Undecided	Agree	Yes	Yes	Yes	Sometimes	No	Sometimes	Sometimes
1786	Male	12-20	Bachelor	Single	Student	Nuclear	≥5	>30,000	Urban area	Less accurate	More Positive	Less frequent	Yes	Yes	Don't know	Don't know	Don't know	Don't know	Agree	Agree	Agree	Agree	Undecided	Agree	Sometimes	Yes	Sometimes	Yes	No	Yes	Yes
1787	Male	12-20	Bachelor	Single	Student	Nuclear	<5	>30,000	Urban area	Less accurate	More Positive	Less frequent	Yes	Yes	Don't know	Don't know	Yes	No	Agree	Agree	Agree	Agree	Agree	Agree	Sometimes	Yes	Yes	Sometimes	No	Yes	Sometimes
1788	Male	21-30	Bachelor	Single	Student	Nuclear	<5	>30,000	Urban area	Less accurate	More Positive	Less frequent	Yes	Don't know	Don't know	Don't know	Don't know	Don't know	Agree	Agree	Agree	Agree	Agree	Agree	Sometimes	Yes	Sometimes	Yes	No	Sometimes	Yes
1789	Male	12-20	Bachelor	Single	Student	Nuclear	<5	>30,000	Rural area	Less accurate	More Positive	Less frequent	Yes	No	Don't know	Don't know	Don't know	Don't know	Agree	Agree	Agree	Agree	Agree	Agree	Yes	Yes	Sometimes	Yes	No	Sometimes	Yes
1790	Male	12-20	Bachelor	Single	Student	Nuclear	<5	>30,000	Rural area	Less accurate	More Positive	Less frequent	Yes	Don't know	Don't know	Don't know	Yes	No	Agree	Agree	Agree	Agree	Undecided	Agree	Yes	Yes	Sometimes	Yes	No	Yes	Sometimes
1791	Male	12-20	Bachelor	Single	Businessman	Nuclear	<5	>30,000	Rural area	Less accurate	More Positive	Less frequent	Yes	Don't know	Don't know	Don't know	Yes	No	Agree	Agree	Agree	Agree	Undecided	Agree	Sometimes	Yes	Sometimes	Yes	No	Sometimes	Sometimes
1792	Male	12-20	Intermediate (11-12)	Single	Student	Nuclear	<5	>30,000	Rural area	Less accurate	More Positive	Less frequent	Yes	Don't know	Don't know	Don't know	Don't know	Don't know	Agree	Agree	Agree	Agree	Undecided	Agree	Sometimes	Yes	Sometimes	Yes	No	Yes	Yes
1793	Male	21-30	Highier education (avobe bachelor)	Single	Student	Nuclear	<5	>30,000	Rural area	Less accurate	More Positive	Less frequent	Yes	Yes	Don't know	Don't know	Don't know	No	Agree	Agree	Agree	Agree	Agree	Agree	Sometimes	Yes	Yes	Yes	No	Yes	Yes
1794	Male	21-30	Highier education (avobe bachelor)	Single	Student	Nuclear	<5	>30,000	Rural area	Less accurate	More Positive	Less frequent	Yes	Don't know	Don't know	Don't know	Don't know	No	Agree	Agree	Agree	Agree	Agree	Agree	Sometimes	Yes	Sometimes	Yes	Yes	Yes	Yes
1795	Male	21-30	Bachelor	Single	Student	Nuclear	≥5	>30,000	Rural area	Less accurate	More Positive	Less frequent	Yes	Don't know	Don't know	Don't know	Yes	No	Agree	Agree	Agree	Undecided	Agree	Agree	No	Yes	Sometimes	Yes	No	Sometimes	Yes
1796	Male	21-30	Bachelor	Single	Student	Nuclear	<5	>30,000	Rural area	Less accurate	More Positive	Less frequent	Yes	Yes	Don't know	Don't know	No	No	Agree	Agree	Agree	Agree	Agree	Agree	Sometimes	Yes	Yes	Sometimes	No	Yes	Sometimes
1797	Male	12-20	Bachelor	Single	Student	Nuclear	<5	>30,000	Urban area	Less accurate	More Positive	Less frequent	Yes	Yes	Don't know	Don't know	Don't know	No	Agree	Agree	Agree	Agree	Agree	Agree	Yes	Yes	Sometimes	Yes	No	Sometimes	Sometimes
[truncated: 220 more rows]
